# Supplementary material for: Comparative Proteomic Analysis of Drug Shikonin Addition to Liver
Source: Research Square preprint supplement (doi:10.21203/rs.3.rs-8322459/v1), 2025-12-16
Supplement: Supplementary file 2 [file e2e2ab426aecfd7c72f77412.xlsx]

## Sheet: Proteome
Accession	ID	ProteinName	GeneName	#Peptides	bel-t2-1	bel-t2-2	bel-t2-3	bel-t3-1	bel-t3-2	bel-t3-3	hep-c1-1	hep-c1-2	hep-c1-3	hep-c2-1	bel-c1-1	hep-c2-2	hep-c2-3	hep-c3-1	hep-c3-2	hep-c3-3	hep-t1-1	hep-t1-2	hep-t1-3	hep-t2-1	hep-t2-2	bel-c1-2	hep-t2-3	hep-t3-1	hep-t3-2	hep-t3-3	7701-c1-1	7701-c1-2	7701-c1-3	7701-c2-1	7701-c2-2	7701-c2-3	bel-c1-3	7701-c3-1	7701-c3-2	7701-c3-3	7701-t1-1	7701-t1-2	7701-t1-3	7701-t2-1	7701-t2-2	7701-t2-3	7701-t3-1	7701-t3-2	7701-t3-3
P54762	EPHB1_HUMAN	Ephrin type-B receptor 1	EPHB1	7	20374.6	23690.7	19050.7	3925.34	2212.64	5848.94	22802.3	2490.74	3015.81	14186.8	98.673	648.211	3873.82	490.465	1858.81	1723.75	829.403	3582.52	691.42	1037.91	2265.2	268.305	2316.54	4815.2	667.724	4196.34	1265.4	1671.68	1200.6			163.493		240.673	8089.42		1912.39	3395.27	6891.28	983.278	975.279	1276.07	1505.43	1680.81	2295.67
P12273	PIP_HUMAN	Prolactin-inducible protein	PIP	4	11757.3	11614.4	10870.8	8466.19	8758.35	9115.42	1070.23	410.502	128.797			92.8367	94.1569	315.644	171.838	4216.31		173.097		2336.36	418.186	830.949		119.237	731.149		1151.06	859.111	856.497	589.104	617.08	415.292	880.063	1302.9	1227.94	1306.31	372.685	1330.86	1089.18			453.809	417.006	324.894	484.401
Q01105	SET_HUMAN	Protein SET	SET	36	18782.6	21911.5	19085.6	8848.42	12096.7	10850.4	80551.7	165128	158451	136299	8725.9	133360	157993	84314.1	84438.5	148835	176876	120202	113049	127241	171487	15800.9	175631	109075	85081.2	101570	149051	151265	177644	58310.8	47371.5	156024	16711.6	55822.8	190028	80891.2	83806.2	48350.6	45812.3	40542.8	42926.5	38172	66414.9	72643.2	75148.1
P30520	PURA2_HUMAN	Adenylosuccinate synthetase isozyme 2	ADSS2	44	3898.32	20187.7	33995.5	4089.09	1174.67	4520.55	37554.9	22805.9	31689.6	20684.5	4922.7	21743.5	31968.5	10058	21759.1	10047.5	19126.3	18728.9	20825.2	37104.1	22257.7		47355.8	19642.9	28378	21306.9	26003.4	30096.3	22903.7	29026.6	30358.1	6392.61	6145.01	8814.25	14821.1	12412.7	24039	12701.4	13638.6	5849.1	8875.92	6947.8	6640.19	10960	14029.7
Q92900	RENT1_HUMAN	Regulator of nonsense transcripts 1	UPF1	91	137919	95850.1	97826.9	46821.5	38764	42409.6	77230.4	63856.7	75430.4	58117.8	46982.3	53346.2	84802.8	81636.6	90479.9	96723	100193	67998.1	87838.7	77719.3	88695.1	38889	82064.9	102888	100533	123015	95697.7	195318	150681	75939	77456.8	77752	33354.8	83393.2	135992	108874	103701	92267.3	84325.4	81098.3	97980.1	110879	65665.2	66186.1	82269
P86397	HTD2_HUMAN	Hydroxyacyl-thioester dehydratase type 2, mitochondrial	HTD2	4	764.65				25262.6	290.62							917.24		3578.65				128.008	237.518						468.684												947.56				4846.72	2167.16	164.308	1331.88
P86452	ZBED6_HUMAN	Zinc finger BED domain-containing protein 6	ZBED6	15		881.858		27485.4	33663.5	988.565	25642.6	2151.46	2289.79	1037.18	252.891	165.535	1778.26	30308.3	532.939		19335.1	567.038			24186.2	19487.2	64597			310.898	495.397	22270.5	89.6473			962.838	394.3	1035.17	430.531	1473.19	651.958			164.071	9538.71	10869.7		945.308
Q9H0K1	SIK2_HUMAN	Serine/threonine-protein kinase SIK2	SIK2	24			6642.46	204.339				666.502	251.735		191.976	882.253		407.316		278.971	351.356		9943.82	1560.06	1245.44	352.044	9488.63	3010.29	984.765	4658.24	181.627	571.872	6301.02	1022.4	2720.62			698.335	30455.7	178.834	449.231	1049.31	310.349	832.527		215.096	987.433	232.275
A8MTY0	ZN724_HUMAN	Zinc finger protein 724	ZNF724	5		1664.85				57312.7											5084.02	29099.8		7012.82			714.073					91.6062				34824.4	19453	2595.47	11626.5				803.487			2359.23	4607.97	5513.54	5257.91
Q86TG7	PEG10_HUMAN	Retrotransposon-derived protein PEG10	PEG10	17		1167.39	266.946			19581	6136.47	7004.63	3236.73	2537.65	485.149	3694.24	5798.1	2683.14	5698.29	3662.78	1953.63	2585.66	3013.26	2322.34	5167.15		6840.09	7536.43	5951.49	9335.99	2528.13	6317.47	3038.19	2399.69	2154.1	1263.76		1624.96	2315.73	632.198	860.677	2711.66	2555.25	3561.24	3676.65	884.379	1643.36	3470.47	1046.4
Q9BYC9	RM20_HUMAN	39S ribosomal protein L20, mitochondrial	MRPL20	13	5320.28	4833.59	6917.02	273.792	208.372	168.287	6122.63	4284.23	30423.9	3649.47	1356.45	3443.38	5999.46	10807.4	11381.9	4385.93	1757.07	5932.6	5400.12	4450.01	6669.43	191.078	3978.68	3943.25	2271.08	5406.58	2899.61	3159.68	2931.63	556.431	340.06	1811.24		4296.79	1700.19	1858.47	5280.91	7893.68	7573.2	1025.8	4095.13	2071.58	4345.41	5879.08	4845.34
A8MWX3	WASH4_HUMAN	Putative WAS protein family homolog 4	WASH4P	6	1045.68						1086.53	811.452	911.532	814.674	1810.14	1007.71	1199.58	1142.71	2172.38	3619.72	13523.1	62328.9	737.543	525.506	286.593	577.488	712.727		1218.6		1792.41		1077.09	1480.47		1320.98	685.97			1776.46		195.63	443.081						493.604
Q9Y6D5	BIG2_HUMAN	Brefeldin A-inhibited guanine nucleotide-exchange protein 2	ARFGEF2	73	24816.5	39710.9	36273.7	11095.7	12246.4	14238.8	51842.1	65853.8	49072.7	183891	79431	147160	71775.6	259611	135199	195179	119748	166469	165907	34531.4	189893	13782.3	139757	14726.4	13920.1	60100.5	28140.1	11809	127862	44279.7	173143	12035.8	71140.1	42248.9	7185.81	14013.5	9177.4	117112	101516	4777.36	18513.6	29831.2	186153	16288.9	39060
Q9Y219	JAG2_HUMAN	Protein jagged-2	JAG2	9	368.868	327.688	357.071		166.595	138.15	195.469		504.112						28185.8	633.123		375.892	3023.53				295.043		155.241		368.016	514.347											142.642	186.181					31733.6
Q02246	CNTN2_HUMAN	Contactin-2	CNTN2	2	3265.63	419.438													152.073	471.385							214.911
O76014	KRT37_HUMAN	Keratin, type I cuticular Ha7	KRT37	4	391.975										500.214		473.526	155.802	398.743					997.609	279.711		545.529				296.425												120.453			525.436		214.921	766.02
Q969Q5	RAB24_HUMAN	Ras-related protein Rab-24	RAB24	8	2851.31	8198.79	5472.52	19505.7	3961.43	5932.44	1221.09	1530.8	1643.23	2457.09		1245.03	7653.33	1993.85	855.309	2176.5	1270.65	1297.54	3764.51	2653.56	6522.81		2055.6	3905.47	4120.74	2739.55	2445.81	31122.8	1926.36	6116.23	503.186	632.676	325.09	385.164	6435.1	567.778	2642.27	2744.12	2088	1501.87	438.036	12491.7	12893.4	484.687	13588
P50336	PPOX_HUMAN	Protoporphyrinogen oxidase	PPOX	27	12393.1	12247	17888.9	23848.3	9441.22	18411.7	11009.4	22481.1	8776.94	7595.74	6080.78	6733.62	6614.36	7960.26	6601.25	7551.55	6703.28	8172.68	8253.93	7616.87	5337.95	8000.04	7890.47	26540	10571	10921.6	1813.05	3650.76	1937.62	4999.93	2317.74	1489.38	3849.71	7234.45	2914.82	42957.9	2874.81	3589.34	4418.97	1054.47	5451.91	4386.53	4082.45	2177.99	2133.5
Q96M32	KAD7_HUMAN	Adenylate kinase 7	AK7	4	363.793		154282	217.525		192.813				264.369	342.297	239.587								126.281			251.054	594.156		11994.9		399.885	10154.7		3586.04				818.595	431.907	253.709	3371.43							5809.94
P46531	NOTC1_HUMAN	Neurogenic locus notch homolog protein 1	NOTCH1	15	16872.5	2718.69	2668.4	5974.08	992.555	3070.44	189.858	1406.91	770.104	3121.61		561.305	208.034	245.283	1732.72		63.7512	454.089	473.922				948.326	4257.8	3229.92	523.75		455.297					7173.67	698.16	213.104		963.686	2167.82	1325.03	943.267	1333.72	2139.07	11471.1	1581.18	1542.2
P32856	STX2_HUMAN	Syntaxin-2	STX2	10	4866.66	1561.25	1357.97	30183.6	11436.9	6315.7	337.411	1357.78	141.907	166.012		1007.73	241.584	207.458	10769.6	204.032	331.455	160.086	111.489	246.952	783.026	13063.4	311.397	340.582	723.422	1428.97	272.096	754.208	8274.74	310.006	1320.48	2865.24	779.628	1871.52	389.847	299.467	719.182		927.712		613.716	1737.29	337.566	1245.78	47421.7
O75817	POP7_HUMAN	Ribonuclease P protein subunit p20	POP7	5	216334						20386.9		229.925	67.599				174084	2139.57	174262	323.301		217241	370.459			25781.3	2378.02	1017.87	223049	1892.94				171907			181110				193.197	334.193			93356.5	88036.8	1698.67	98456.4
O95218	ZRAB2_HUMAN	Zinc finger Ran-binding domain-containing protein 2	ZRANB2	16	4990.66	3936.16	3374.16	12235.3	5202.41	3605.53	27080.2	40688.2	36661	38902.8	6057.38	36878	38763.1	37191.4	38236.4	37607.9	20018.7	19212.5	19356.4	18780.2	24865.3	4714.95	20544.9	22425.2	22302.2	23782.7	37582.6	38885.2	39505.4	28467.3	23610.4	24180.9	5803.09	32981.2	36943.8	36649	15810	14489.6	14814.1	8897.28	8795.7	7792	11160.5	8139.64	12379.1
Q13185	CBX3_HUMAN	Chromobox protein homolog 3	CBX3	22	36625.7	37964.2	43236.7	6288.66	6206.96	7308.55	91870.9	96422.9	80552.9	81885.5	6068.55	79240.2	87281.7	53121.4	78110.3	78344	42711	60825.9	58917.4	51701.3	85152.4		87918	55910.5	56426.3	59916.8	33897.1	37153.1	42165	19165.6	25393.5	19299.1	21224.6	42485.9	47103.9	28276.8	30631.1	13839.5	27361.2	40532.8	38419.3	38938.7	38652.1	30062.5	37354
Q17RY0	CPEB4_HUMAN	Cytoplasmic polyadenylation element-binding protein 4	CPEB4	17	214.74		269.725		760.24			2926.59	1474.88	2024.07					1668.72	1692.02	1349.36	2116.45		17507.2			1220.44	767.753	1823.7			772.747	268.247								1251.64	1269.11	1576.02	777.09	321.286	1041.82	1477.29	1092.13	672.107
O14657	TOR1B_HUMAN	Torsin-1B	TOR1B	16	30216.6	30854.5	40716.7	1085.17	2788.14	6081.11	1061.89	3350.26	20219.2	1423.46			2706.2	19339.2	1026.84	1491.06	507.907	2928.43	13295.6	2553.2	3572.1	424.334	5492.74	4245.28	2037.41	2792.59	8501.18	3999.69	6172.49	6963.86	10235.5	11013.3		1960.02	8741.8	8589.48	9045.33	12613.4	175684	36300.6	23221.9	12485	8540.82	10312.1	11903.9
P01889	HLAB_HUMAN	HLA class I histocompatibility antigen, B alpha chain	HLA-B	32	32406.4	36972.2	32974.3	40471.9	47050	47427.3	80477.4	60529.8	80277.2	74766	30403.7	48242.9	85304.3	45253.8	45274.6	48463	66354.1	32725.5	53830.9	50635.3	56928.1	23914.6	42200.8	32538.6	56813.7	37806.9	80026.1	79129.6	73016.6	105366	80287.7	77855.7	8614.96	114548	102011	90324.5	53989.8	64753.9	68846.7	83628.2	95438.7	97578	71438.4	73362.8	80589.7
P17014	ZNF12_HUMAN	Zinc finger protein 12	ZNF12	6	13274			6549.52		3847.9		228.495		726.778						262.53				99.6513	365.235						525.2	1557.4															3180.03	1349.59
Q86TI0	TBCD1_HUMAN	TBC1 domain family member 1	TBC1D1	11	1806.94			767.262		5996.24	585.239	547.045	8298.43	948.4	6431.03	855.705			656.795		1572.24		13957.6	3372.95	3031.65	6353.02		1470.82	179.048	3764.14						268.422	4520.18		9198.18			232.826	178.739	10474.6	4479.16	285.193	7826.37		5089.31
Q9P0M9	RM27_HUMAN	39S ribosomal protein L27, mitochondrial	MRPL27	4	175.241	2436.83	25604.9	6439.27	5658.12	4786.27	4501.57	5846.84	3153.64	7168.96	3152.34	3043.56		1783.51	2326.57	2568.27	6868.25		2940.51	2763.3	3369.72		2605.46	7496.92	4834.78	8207.86	6991.05	3569.11	7713.81	4346.81	5423.67	5210.53		3333.53	2916.43	3696.4	5937.8	4382.75			5537.45	4166.43	5729.55	5130.32	4541.27
Q9HD20	AT131_HUMAN	Manganese-transporting ATPase 13A1	ATP13A1	50	117868	112000	105406	89780.4	34233.9	77822.5	120830	26942.8	7709.47	5940.03	230930	16817.3	8821.73	3699.71	22318.3	4119.35	234630	9414.73	7579.72	8341.22	27464.3	24193.4	8175.67	7857.98	13762.5	4185.43	7391.59	17145.9	8527.21	13306.1	15979.9	17111.3	28451.1	10055.4	163494	12018.8	57762.1	13842.4	207650	74505.9	74358.3	73290.7	68725.5	70250.4	91561.9
P11166	GTR1_HUMAN	Solute carrier family 2, facilitated glucose transporter member 1	SLC2A1	13	39577.8	42033.3	44492.5		1081.61	1693.24	1979.78	1792.61	1692.05	2981.86	103336	2967.81	3464.94		375.223	580.179	2117.75	3645.72	3361.1	8325.22	3756.37	627.307	3614.22	591.804	808.163	838.332	4819.25	15142.5	643.975	431.399				24439.1	136.839	3202.14	16757.9	3870.75	3759.88	16850.6	1112.7	13041.5	21938.1	6051.16	3492.12
Q9BVI4	NOC4L_HUMAN	Nucleolar complex protein 4 homolog	NOC4L	24	6159.86	8504.54	9809.79	4019.31	3158.3	3479.01	10370.4	5006.64	4200.83	5084.89	4068.16	5658.28	6525.58	4517.38	11033.3	6964.36	8452.95	6298.3	10078.6	6921.07	5972.69	10544	5900.16	4483.52	6393.95	6520.09	7514.13	11922.5	13537.3	7725.96	18172	17150.8	12092.3	15017.1	7370.64	5627.88	15021.7	10824.4	13520.1	10412.9	16051.1	8960.25	13974	14824.6	17092.6
O00743	PPP6_HUMAN	Serine/threonine-protein phosphatase 6 catalytic subunit	PPP6C	21	9868.77	14960.6	22556.5	216.904	173.477	1585.62	31464.6	30087.7	19418.7	13964.6	7653.48	18794.5	21469.4	17552	13215	18962.8	13586.4	12553	15591.9	141776	150913	16709	16331.7	12092.9	10375.7	15148.9	9570.36	18214.1	118374	3460.18	11752.9	7971.71	2839.16	14346.8	12137.9	124962	8897.08	7773.3	18011.4	7582.51	16330.5	123428	89825.7	8046.46	17228.7
O14735	CDIPT_HUMAN	CDP-diacylglycerol--inositol 3-phosphatidyltransferase	CDIPT	5	14994.9	11723.4	12926.5	22896.9		16991.9	3449.09	6030.63					5030.4	2763.45	4959.72	4182.76	17577	4451.58			16070.2	12988.3	24486.4	28916.8	32116.6	31664.8	28302.3	31272.7	30227.8	90115.9	3760.61	84.8011	2610.82	167.837	30248.7	29657.8	18838.4	21141.7		30886.7	34166.1	32775.5	467.897	2946.74	3198.61
Q13137	CACO2_HUMAN	Calcium-binding and coiled-coil domain-containing protein 2	CALCOCO2	26	21129.1	25273.1	26034.1	10220.1	63148.8	79833.1	957.517	2098.32	48934.4	196.881	4504.98	560.922	1170.31	815.579	136199	883.034	440.539	904.542	1469.71	1108.14	1393.77	4056.68	12143	2295.19	3557.97	4612.4	1374.92	2281.79	9988.16	3193.12	163612	163220	1597.09	2329.52	755.363	9555.27	1955.48	10889.8	2613.7	2748.37	8062.83	8430.65	199851	916.007	4807.7
P38398	BRCA1_HUMAN	Breast cancer type 1 susceptibility protein	BRCA1	28	426.718		3321.27	3375.21			2187.39	2690.68	1524.78	15697		2561.21	1444.96	1710.65	957.787	1476.79	592.488	482.291	391.171		6066.21		1465.11	2208.11	2766.73	366.112	3664.27		536.182		488.08			12536.3		2675.11	3585.84		123.84	1833.3			3118.53	10906.3	421.968
P51692	STA5B_HUMAN	Signal transducer and activator of transcription 5B	STAT5B	42	3887.01	3634.09	8787.79	2301.49		19314.6	65504.2	64664.1	27723.6	50134.6	377.075	27263.1	30146.2	31075.7	25767.3	40018.7	23235.2	25565.9	26242.8	32513	26454	27188.6	30702.4	31667.8	40552	32259.4	19790.3	18027.5	18124.3	11666.8	13024.9	12578	333.388	15531.1	30765.5	17321.8	31548.7	29454.7	24797.9	24520	22487.4	24144.4	17173.6	28592.8	14656.1
P30876	RPB2_HUMAN	DNA-directed RNA polymerase II subunit RPB2	POLR2B	79	77058.8	41353.6	41858.4	24060	23947.3	23295.2	26132.7	24198.8	16857.4	37020.4	28271.3	29548.3	44852.1	25006.8	73661.2	23401.7	23689.7	27366	19329.4	27014.8	16679.5	8420.23	79053.3	24595.8	23771.9	54836.5	25508.3	16519.4	71058.1	12730.9	12434.6	14752	13547.9	15945.5	19428.7	18085.9	21002.6	17459.1	25764	16651.3	26884.3	18007.6	13952.1	18438.7	17108.8
Q96QK1	VPS35_HUMAN	Vacuolar protein sorting-associated protein 35	VPS35	74	132164	132429	138097	98836.1	96936.8	81335.6	62928.9	68373.9	209816	77453.6	55716.9	58651.5	67337.3	51711.5	52135.6	56375.6	70123.8	53601.7	55909.4	54496.6	69735.2	94477.3	62072.9	50326.2	63766.3	66758.8	40105.5	88178.5	85538.6	49041.4	35992.8	60677.1	36562.1	76878.8	53717.3	40182.7	32801.9	46717.3	181602	25499.2	49091.6	27146.4	30948.9	32412.1	33836.5
Q9UBQ5	EIF3K_HUMAN	Eukaryotic translation initiation factor 3 subunit K	EIF3K	19	50174.3	43722.6	44537.8	46130.8	26434.4	22144.6	26133.3	29382.8	22692.5	4078.17		11540.3	27558.9	14104	15537.7	9388.4	23636.5	16147.8	21426.7	21536.7	12465.8	10087.8	2025.42	12164.9	32100.5	4907.34	9919.74	29057.3	33363.3	3523.29	4922.76	12515.6	11365.6	7821.94	11429.3	16325.8	13038.5	8103.44	20201.1	16433.2	21074.8	19392.1	21980.4	18375.2	21138.5
Q9Y3X0	CCDC9_HUMAN	Coiled-coil domain-containing protein 9	CCDC9	21	256.451	2843.59	863.569	542.916	85444.1	295.218	1123.13	1393.31	50066.6	200.922	10288	5340.27	969.935	1955.12	8945.86	10531.3	2897.31	9711.06	5181.12	17363	5540.04	3821.06	6456.43	5401.53	5300.71	8204.43	1624.95	2597.04	2479.07	1420.25	1039.1	28844.8	5500.12	38204.4	1348.22	1297.52	2393.97	11613.3	245.903	732.678	2711.28	7409.21	15348.9	25447.8	15150.1
Q9GZV1	ANKR2_HUMAN	Ankyrin repeat domain-containing protein 2	ANKRD2	5			2531.97		1653.75	1708.52	697.158	768.876	532.246	1214.37		487.396	629.193	14584.1	352.673	693.671	551.888	576.443	680.094	755.183	2533.78	28797.6	1066.71	1085.71	1887.44	1174.34	21929.2	9871.28		12704.2	2720.59	21103.9			16965.5				27311		33700.7		44586.2	39297.8
Q709F0	ACD11_HUMAN	Acyl-CoA dehydrogenase family member 11	ACAD11	24	11454.4	9777.49	19228.5	1801.54	1642.94	1814.21	2215.55	2478.03	5029.99	454.805	7689.84	5590.8	1983.9		2287.97	9888.48	2141.3	42146.2	228.052	616.124	736.655		2114.86	11138.7	1919.32	2774.82	1640.98	2217.85	11887.4			529.381	657.328	461.943	839.254	771.585	3913.84	4035.58	5569.28	6497.13	5622	5894.03	2704.45	3433.78	3929.33
Q9H477	RBSK_HUMAN	Ribokinase	RBKS	8							2231.18	859.38			452.987	523.782		1000.56	299.34	1124.3	388.54			244.362		125.081				1229.96		586.075	518.954	1928.27	617.125	781.711		164.836	1244.82			970.61				714.9
Q9NSE4	SYIM_HUMAN	Isoleucine--tRNA ligase, mitochondrial	IARS2	52	48840.6	49683.8	46142.3	59467.5	78742	74323.3	37109.4	30381.8	24508.2	24438.7	18220.9	20492.7	23732.2	31846.8	21657.3	18752.9	26693	22313.9	33176.5	34743.9	53103.5	22316.1	34042.8	58071.4	43453.4	46157.4	46792.7	40804.1	52596.8	34852.3	48386.9	33425.7	22596.7	40347.9	54712	41407.2	67704.5	61918.8	69278.3	71503.1	74202.6	81738.6	62567.9	64052.8	59976.8
Q9HA47	UCK1_HUMAN	Uridine-cytidine kinase 1	UCK1	6	380.714					520.801	1125.89	7134.23	7642.81	521.369		781.214	1039.92	529.213	6871.51	7096.09	1051.27	1136	982.023	923.789	1727.66	293.309	897.55	2506.31	751.017		727.801	1278.74			5955.4		207.692	407.591		318.609		4878.22			6540.27	18858.1	16799.5	20112.2
Q86UE8	TLK2_HUMAN	Serine/threonine-protein kinase tousled-like 2	TLK2	22	775.318	1638.83	1282.74	222.805	3394.87	9912.48	7216.06	4609.93	39778.9	1372.17	20789.6	3009.09	2933.01	2210.19	2402.52	2833.44	4837.65	2099.1	461.334	5128.26	3759.72	500.954	2877.99	7603.47	1860.83	1598.72	3153.97	2536.75	3722.45	2309.31	4810.3	4528.77	650.286	2658.39	3588.31	2550.45	3819.32	4077.12	4080.7	2789.17	2323.37	2492.67	4229.85	3068.96	4092.03
Q69YU5	BWNIN_HUMAN	Protein BRAWNIN	BRAWNIN	6							1764.42	9117.42	2993.16	2043.57		1924.38		2624.42	1099.82	1692.62		2080.24	152.301	1129.95	658.134			700.264	917.674				772.836		1831.05			3174.35		1984.82	1865.65		746.504					25853.7
Q8NFH5	NUP35_HUMAN	Nucleoporin NUP35	NUP35	22	24779.4	22990.2	21475.8	11262.8	12927	13519.7	20123	28865.3	13587.1	13064.2	7418.19	17024	22065.1	10390	32357.4	12673.7	17723.3	16515.6	8639.1	11692	24483.5	7621.19	17890.4	43727.4	46178.8	29935.7	11669.5	5741.2	29435.6	12050.6	12247.1	11091.9	10506.3	42878.6	33615	11604.8	42971.7	29791.4	26065.4	25123.8	24145.3	26701.5	15028.4	17109.9	18116.9
Q9P215	POGK_HUMAN	Pogo transposable element with KRAB domain	POGK	13	1261	1292.83	428.157		1304.09		10388.4	14301.4							11684.3	17095.2	134.393	674.63	523.178				633.716		47660.1						4744.8	3994.2			22157.4		647.394					597.834	62744.2
Q9Y2A9	B3GN3_HUMAN	N-acetyllactosaminide beta-1,3-N-acetylglucosaminyltransferase 3	B3GNT3	4						5652.21		759.038	1031.15		1698.67								749.769	276.328		111.449																335.479	1607.96
O95239	KIF4A_HUMAN	Chromosome-associated kinesin KIF4A	KIF4A	57	37147.3	17123.8	21436.6	20479.8	16906.5	26167	20710.2	15226.5	14439.6	15068.3	4209.27	22093.4	14244.2	12814.7	11720.2	10805.6	12822.2	13608.6	25229.1	32929.9	20261.7	5171.64	27034	21700.5	48091.9	20926.6	15304.6	19096	7341.38	9883.07	11882.6	10582	15099.5	20976	18939.8	15126.2	12084.1	22389.7	23014.4	59954.6	19503.6	30799.2	21469	13928.9	24716.1
P62333	PRS10_HUMAN	26S proteasome regulatory subunit 10B	PSMC6	54	86802.6	93079.1	87069	36597	45662.2	37767.1	47858.8	45837.2	28729	45229.3	11877.8	33639.3	46611.4	34184.4	33195.6	32424.8	188143	43723.4	45200.5	46407.1	60293.5	34023.6	45998	48269.5	46956.4	63760.8	75591.5	79899.8	77592.1	54859.7	41830.7	40434	16885.1	68541.4	123368	128574	71714.5	65652.4	65772.7	73174.1	79205.3	75730.1	56680.6	64269	57482.7
P54132	BLM_HUMAN	Bloom syndrome protein	BLM	66	5299.93	60337.6	17128.7	16185.5	2172.54	19481.1	6543.14	18951.1	18623.3	25951.6	18229.6	9737.68	4596.27	19515.8	13280	3640.66	4410.11	11886.4	15416.9	13488.7	15028.4	5541.89	9310.22	10150.4	10551.5	15447	17961.3	14322.1	11247.4	1725.97	10847.6	10874.4	577.976	15011.6	14655.2	45858.7	5798.35	17127.4	18596.3	17052.1	114024	24997	13961	14208.4	33261.9
O43670	ZN207_HUMAN	BUB3-interacting and GLEBS motif-containing protein ZNF207	ZNF207	15	8389.6	6477.02	3619.79	8479.48	1590.52	8981.64	21721.6	10584.8	15720.2	17069	4160.38	21348.6	15777.1	8911.25	12675.9	20094.6	16447.6	14585.9	17127.4	9905.57	22212	4562.71	19607.3	22966.9	21164.3	23714.2	11731.1	11436.4	13006.3	7704.18	12991.3	12708.1	2521.37	11294.6	11093	10822.6	16811.6	17109.9	20354.9	15384.9	14977.4	15481.3	11680.8	11315.3	8082.93
Q6P0Q8	MAST2_HUMAN	Microtubule-associated serine/threonine-protein kinase 2	MAST2	34	8260.29	2575.83	2926.4	395.13	4321.64	1754.23	570.708		634.903	434.525	288.085	3801.63	5798.64	12405.1	4297.99	4508.3	1156.57	9602.94	5807.36	17294.7	6534.5	4239.9	5832.38	2901.6	856.788	504.272	752.984	210.061	28835.3		2969.86	4110.96	306.955	312.904	3313.2	1879.37	9125.51	1884.5	14518.6	7150.76	2090.72	1768.96	2139.5	978.232	4375.69
Q96IL0	COA8_HUMAN	Cytochrome c oxidase assembly factor 8	COA8	5								3625.39	2455.77	3158.61		1862.54		175.804							149724		435.431	8512.87																			460.861
Q9BWT3	PAPOG_HUMAN	Poly(A) polymerase gamma	PAPOLG	28	3869.08	12966.5		1532.34	3406.41	1092.26	3990.69	3842.04	1942.57	1832.92		29877.9	3739.61	293.782	1503.48	361.74	3154.25	9138.13	5451.44	21621.3	9034.48	985.683	3313.3	2565.83	1341.69	12510.2	7494.12	1954.61	4399.56		365.657			1343.94	12131	18819.1	3475.42	2040.85	1533.45	412.322	1428.84		2528.36	1495.4	1499.69
P05186	PPBT_HUMAN	Alkaline phosphatase, tissue-nonspecific isozyme	ALPL	8			18295.5	134.44			13624	125.405	4455.97	224.617	201.223	3275.26	306.829	276.508	11067.1	237.227	298.153	14720.7	2805.21	10975.5	12505.8		306.311	17407.2	388.982	1171.27				720.938							2753.48		1053.56		675.258		827.708
Q8NDH3	PEPL1_HUMAN	Probable aminopeptidase NPEPL1	NPEPL1	19	5045.35	6889.25	7483.77	2810.85	2239.91	2700.69	7360.42	5164.53	6925.9	5964.53	6740.95	5931.58	8346.65	2991.59	5748.49	3075.86	2150.02	11573.5	3873.42	5325.79	4326.01	4438.06	4568.86	2440.28	4000.26	5110.35	3154.16	61535.9	3139.43	1582.02	2210.12	2384.04	4952.66	2809.08	3707.38	4685.8	3588.5	2760.6	20099.6	7373.94		23777.9	6873.25	2870.07
Q6P6B7	ANR16_HUMAN	Ankyrin repeat domain-containing protein 16	ANKRD16	11	2282.89	2644.76		2203.57		5322.01	784.802	514.031	1427.83	548.285														5749.41											733.209		993.002		588.549			3416.93		2225.85
Q9NYJ8	TAB2_HUMAN	TGF-beta-activated kinase 1 and MAP3K7-binding protein 2	TAB2	16	2137.96	51679.3	1271.03	949.801	6747.78	623.323	3562.54	7905.45	6523.03	119.813	2111.51		2592.6	11636.4	829.531	6626.69	552.318	12508.6	9862.66	5810.7	2030.14	5964.32	1033.1	2153.3	1338.32	2700.26	1099.88	3003.48	1187.86	1696.71	2841.08	576.791	2630.17	4415.55	17068.4	4485.27	1498.8	1398.25	3201.04	2831.84	1852.84	895.511	536.798	1523.01	1645.07
Q6P2D0	ZFP1_HUMAN	Zinc finger protein 1 homolog	ZFP1	4			236.959	53881.2										2030.66	3680.97		255.193		1372.06		5878.05	138.276	921.7			721.904		456.243									513.785	635.931				1594.51
Q8IY33	MILK2_HUMAN	MICAL-like protein 2	MICALL2	25	2666.32	2134.67	5399.02	1732.6	228.262	4283.07		416.447	253.542	264.641	4847.85	149256	548.878	650.387	372.396	19169.8	2387.77	5876.86	60449.8	1686.33		556.376	943.625	907.69		471.935	550.633	467.448	587.886	12697.3	2155.91	10470.9	1330.81	45800.7	451.937	3714.8	1144.22	481.227	1879.46	2147.27	921.583	1650.8	17648.6	582.216	1062.61
Q9ULI4	KI26A_HUMAN	Kinesin-like protein KIF26A	KIF26A	14	14760.4	1046.44					4449.1	960.36		289.952	10222.3			491.458	515.495		4457.29				2008.42		806.348	4021.87	1499.79	190.16	649.214	11150.8	592.097	1275.39				3047.03		9353.68	377.95	141.961			1660.99	2558.99		2031.65	3512.12
Q14872	MTF1_HUMAN	Metal regulatory transcription factor 1	MTF1	8				547.456		1563.11					495.738					522.858			779.977	893.876			900.735					330.117			182.73	60.8595			296.632	354.285						719.761		5748.25
P17020	ZNF16_HUMAN	Zinc finger protein 16	ZNF16	7								32868.2				18306.2	2577.32		4145.62	96.3067	1359.39	2111.91	2955.19	34320.9	1375.44		1057.09	8176.84		504.022	15265.1					414.955		5967.72		18338.6							359.797	1884.45
Q5BKX5	CS054_HUMAN	UPF0692 protein C19orf54	C19orf54	3	257.818			1368.01	2492.74										303.612															100.925						1298.21
Q9H4I2	ZHX3_HUMAN	Zinc fingers and homeoboxes protein 3	ZHX3	16	485.813	398.622		294.179			240.491	1990.76	38544.9		31883.8		1592.12	2350.86	7402.14		168.972		450.373		21806.2	1336.63			426.019	1558.76	1514.31	7804.5	717.33	109.848	9002.27		5159.53	751.698	3181.98		10961.4	6294.59		5580.11		306.169	2530.2
Q8NBA8	DTWD2_HUMAN	tRNA-uridine aminocarboxypropyltransferase 2	DTWD2	8	1568.69					483.709	469.323	292.035			1112.61	383.599	464.645	387.214	263.286	553.504	301.301	466.643	300.409	332.147		133.557	929.954	569.345	644.233	609.944	241.494		225.426		19270.7			27866.6		32369.9	441.335	407.383	781.705	435.425	486.31	349.359	874.005	472.353	742.33
P08476	INHBA_HUMAN	Inhibin beta A chain	INHBA	2							805.243	396.701	4369.4	537.957		5356.65	6349.62	2446	1900.77	2118.81			1014.36					5236.57	5419.8		1920.81	8800.19	1819.73					2954.97	2501.47	1987.95
Q99766	ATP5S_HUMAN	ATP synthase subunit s, mitochondrial	DMAC2L	7	4837.63	1884.06	4946.16	15131.7	3023.33	3146.24	5384.36	601.852	1736.28	9194.02	424.734	537.905		6756.4	403.106		105.558	656.709	972.601		367.334	51389.3	280.317		775.637	574.508	686.691	1319.67	538.777		1311.47	704.231	43326.4		1712.99		6281.73	2704.78	3812.95	4159.03	4169.38	5207.01	4556.7	2872.56	2463.78
Q9UBT2	SAE2_HUMAN	SUMO-activating enzyme subunit 2	UBA2	53	20118.7	5390.38	5594.62	8052.97	4256.48	26447.5	12828.9	17265.5	24280.1	25820.6	4018.87	40793.1	28895.8	28439.4	19675.2	29825.3	39369.5	33102.8	24162.5	67570.5	34858.5	12064	39878.4	30309	35601.1	34361.2	31720.5	34084.8	46739.8	19938.5	19059.8	16954.5	10623.7	27424	23505.6	25625.1	40688.2	21722.3	24789	19735.5	17384	21817.6	32087.2	6759.28	18734.6
O43741	AAKB2_HUMAN	5-AMP-activated protein kinase subunit beta-2	PRKAB2	13	2203.12	2207.41	2765.66	406.394	455.892	273.616	747.695	580.07		622.138	2625	131.987	3908.76	219.948	343.522	1535.85		117.176	216.515		218.264	2652.67	208.412	179.527	203.293	384.443	327.368	2644.57	271.744	328.409	5126.85	363.744	2393.74	675.558	293.138	1416.11				969.647
Q9GZV5	WWTR1_HUMAN	WW domain-containing transcription regulator protein 1	WWTR1	8		1155.81	927.324	673.516		198.809	12352	752.802	1206.93	1128.53		5719.43	3149.81				1111.01	2021.72	165.314		682.596	2653.08		124.858	213.751	635.549	86.8125					1428.94		965.318	2548.54			591.359	3454.89	687.933	1681.61	2809.9	1121.33	1289.64	1754.26
P48637	GSHB_HUMAN	Glutathione synthetase	GSS	41	2728.15	3297.04	48659.3	5714.09	2093.78	10941.6	9751.96	14881.8	9166.86	20060.1	5307.72	18215.5	16551.7	54303.6	55981.9	8929.57	8285.4	5683.32	17773.5	9696.63	19097.2	44413	17576.2	8899.28	18332.6	6310.9	34422.1	15047.5	19858.5	12860.7	13406.2	32285.8	5493.89	14987.7	32898	85738.1	34569.3	13160.9	13055.2	35288.8	10689.7	36986	6036.93	14239.2	5840.68
Q9Y3L5	RAP2C_HUMAN	Ras-related protein Rap-2c	RAP2C	16	10683.4	12007.9	13000.1	5506.56	1911.43	3221.24	10731.8	4570.84	4892.01	3579.01		4340.1	4924.87	2018.17	8983.11	4257.56	4384.24	4009.11	8556.04	5008.31	4626.61		3733.03	6527.2	9530.23	5867.49	3259.41	3317.92	3302.98	12736.8	2160.21	2262.06	9328.38	4600.53	3112.96	3276.47	24348.8	10616.9	6942.11	4482.89	4428.47	3961.06	6540.48	5960.33	5582.01
Q9NZ43	USE1_HUMAN	Vesicle transport protein USE1	USE1	13	1199.15	2138.41	4617.76	3152.14	3601.19	6236.07	3201.3	3407.5	3017.34	3490.61	873.186	1255.35	3151.48	1934.85	1349.41	4606.57	6312.11	3098.25	5865.69	3742.7	3475.31	803.764	3265.24	2847.4	5744.29	3352.78	3853.77	18892.8	1131.29	1082.74	1418.66	987.366	740.063	2334.04	690.977	996.812	2219.85	5645.96	8782.34	3656.33	3565.92	6840.77	2586.54	3954.64	2121.39
Q9H4H8	FA83D_HUMAN	Protein FAM83D	FAM83D	24	1384.13	135.054		380.803	13803.1	267.038	9758.58	16183.1	13277.8	4661.15	2095.78	12930.6	17324.3	4926.34	738.524	1751.3	3710.32	11983.1	7343.49	5273.18	9986.56	1895.11	12246.8	6130.18	17431.1	3528.31	13986.5	3164.22	4115.06	1330.13	398.863			2989.48	2785.56	3375.24	8927.58	14979.3	309.676	8251.08	5699.44	2632.51	12888.3		3866.32
Q9NW82	WDR70_HUMAN	WD repeat-containing protein 70	WDR70	42	11117.4	19472	8575.39	16439.2	9509.73	5766.55	29410.9	26249.3	20248.4	15128.2	1170.35	23353.7	20729	13136.4	19101.5	19142.8	33258.9	16247.5	23721.4	22030.1	19501.9	1564.8	14474.4	18210.4	19583.6	20009.8	11500.6	14339.4	18455.5	2645.72	28357.8	25222.3	1327.74	7856.17	11056.5	9031.69	45929.3	19664.5	41190.3	49376.2	18793.2	21907.5	26778.9	50514.1	24420.7
Q9P2K8	E2AK4_HUMAN	eIF-2-alpha kinase GCN2	EIF2AK4	50	22704.7	102169	15763	15850.7	19950	31840.6	6204.04	2300.41	923.822	26167.8	2035.77	3118.97	2357.89	38470.4	34544.3	50314.4	25220.1	25718.3	29067.8	2352.85	57328.8	4149.12	4341.59	62819.5	45415.4	20255.9	32804	33057.2	28743.7	4985.42	3390.4	5689.96	2403.61	2626.86	4730.36	33603.8	25308.8	27294.7	621.06	72612.9	25970.4	97570.2	12680.4	36554.3	22867.7
P62330	ARF6_HUMAN	ADP-ribosylation factor 6	ARF6	10	30583.9	31249.8	31577.2				9017.46	230668	7177.73	6261.78	3899.62	6823.28	7841.31	3893.59	5463.34	18882.3	5722.98	4808.94	7891.42	12978.7	9409.72	5148.61	10716.9	9608.53	7203.22	2679.56	36728.4	16841.3	16364.2	7166.26	6705.85	120532	5442.72	9746.83	8172.38	9411.76	15300	12563.8	12571.7	5917.92	7520.52	7165.28	10523.3	8005.98	10923.6
Q8N5N7	RM50_HUMAN	39S ribosomal protein L50, mitochondrial	MRPL50	15	26622.9	23031.3	21809.8	10559.3	11145.3	8982.49	6720.39	11071.9	5816.97	8216.1		6593.89	9905.96	3886.26	29343.3	7499.09	8029.49	5982.79	5737.65	28591.7	7303.14	3150.09	35044.3	6735.03	3272.03	4254.07	10447.1	9915.99	3075.35	8342.95	9200.89	2414.84	1690.76	9706.57	15685.7	5638.78	10599.1	1866.57	3228.29	13327.6	15475	15358.8	10471.5	5612.09	12128.2
Q8N1G2	CMTR1_HUMAN	Cap-specific mRNA (nucleoside-2-O-)-methyltransferase 1	CMTR1	41	6729.99	6598.6	5619.49	4730.16	13766.1	8876.27	3309.05	5022.03	4075.94	7925.74	550.894	5977.94	16692.7	6140.14	8199.35	31863.2	5604.15	8216.63	12955	7506.5	10352.7	3156.14	8779.62	11830.5	11446.1	13756.5	5328.11	12264.8	7317.08	7201.1	5932.36	21362.7	1488.02	7085.81	6674.87	6556.63	40810.3	18996.2	42954.6	795.203	2992.48	3093.76	7230.21	3183.38	5297.29
P40337	VHL_HUMAN	von Hippel-Lindau disease tumor suppressor	VHL	4	910.807					3163.98	1660.76	432.481	1527.51	1477.71		1399.84	1256.14	1641.53	1117.47	1000.3	474.332								339.076		472.396	816.636			214.096	456.94		438.392	703.525
Q9HAH7	FBRS_HUMAN	Probable fibrosin-1	FBRS	7			4320.4			335.292		845.3		96.1295			216.242			4088.03	246.355	42428.8	1174.82	195.072	6361			2507.06			1818.35		2263.04				262.436	961.733		803.716	2455.86		1695.95	1979.13	1450.92	2597.01	1512.58	194.331	2199.85
Q08289	CACB2_HUMAN	Voltage-dependent L-type calcium channel subunit beta-2	CACNB2	7	261.68									658.694		272.581	365.605		313.16		1170.52	418.928			4830.61										305.308					988.489		1658.05	4005.07		2823.35		727.283
Q8WTV0	SCRB1_HUMAN	Scavenger receptor class B member 1	SCARB1	19	6731.27	3979.06	5496.3	2064.03	380.203	5814.89	10633.1	9307.43	5594.37	12291.5	681.782	1584.37	8361.31	1758.23	36999.1	1787.36	6923.37	5948.62	7318.06	7879.17	6737.85	480.783	12982.4	9542.62	11258.5	9597.77	4637.72	13145.7	6430.06	3427.96	5050.59	3323.65	2825.96	6244.26	3899.86	8955.1	17286.8	18324.8	20146.6	13296.3	11657.5	9533.05	12836.8	14706.2	12652
Q15819	UB2V2_HUMAN	Ubiquitin-conjugating enzyme E2 variant 2	UBE2V2	14	21411.4	19708.2	16550.7	11607.2	14339.9	6741.71	47933.3	45759.1	39479.2	71795.8	8247.92	66239.9	61403.7	36404.8	28476.5	53578.2	20005.4	31930.1	27000.1	31069.6	30900.1	21908.4	26306.6	17776.1	8452.25	13112	32651.8	31547.6	25482.7	18796	22870.6	15655.8	64525.4	36323.4	37356.7	17997.5	6729.39	2949.15	10674.1	5933.83	3540.63	8190.35	13408.7	10718.1	5348.66
P61024	CKS1_HUMAN	Cyclin-dependent kinases regulatory subunit 1	CKS1B	6								961.456				2660.72							108.176		724.06	79.5105		808.332	588.039		1115.36	2220.04	1312.29							577.594		1787.92				189.288		340.213
P21359	NF1_HUMAN	Neurofibromin	NF1	86	20326.9	7460.9	7782.35	10014.7	7642.59	18544.1	1462.01	4637.01	20962.8	13272.1	4274.14	5765.85	19024	16466.4	22164.9	906.869	12932.7	18081.1	11179.9	24356	9685.17	12434	5729.89	12792.6	3907.05	44899.2	11058.9	2079.49	4892.97	2824.75	81.8584		11187.5	2031.11	5480.97	5461.82	57088.3	6135.6	84615.8	7972.44	33128.6	8017.27	42292.2	2025.42	5180.28
Q712K3	UB2R2_HUMAN	Ubiquitin-conjugating enzyme E2 R2	UBE2R2	8	1702.01	500.236	4110.26	1642.06	8017.22	6612.65	8048.17	8440.04	6357.64	5912.55	535.574	6815.26	6430.33	5092.23	5138.94	5757.22	5547.26	5719.44	7317.4	6791.19	6257.6	8142.48	5358.51	7415.55	7220.5	7368.36	10782.1	24255.2	11096	5061.53	6939.68	4489.82	7790.19	8201.97	8907.39	6153.26	6519.2	1782.63	5720.03	4519.87	3808.78	4228.82	5155.04	7949.2	4534.77
Q8TCU6	PREX1_HUMAN	Phosphatidylinositol 3,4,5-trisphosphate-dependent Rac exchanger 1 protein	PREX1	16	2289.03	1239.94	4563.7	1227.23	11633.9	5748.41	526.107	1169.54	766.374	590.341			524.424	375.074			1154.18		747.842		1464.2	3745.37	3854.83	1815.34		5202.62	3625.61		10358.5		212.987	139.976	5063.93	452.777		296.12	1783.13	235.354	1254.22		2331.42	2624	821.165	610.723
Q8NF37	PCAT1_HUMAN	Lysophosphatidylcholine acyltransferase 1	LPCAT1	31	37400.7	41318.1	56206.5	44669.3	43329.3	41888.3	15641.5	54504.6	29649.1	16240.2	35659.8	32393.8	21020.7	18755.3	9153.17	10494.8	30597.1	12495.2	21132.7	26560.1	24555.4	34404	25883.7	23726.7	24267.4	33114.4	10600.6	12528.1	16146.2	16348.9	18754.7	17043.8	49370.6	14794.9	14316.3	14868.3	23373.4	28818.7	34743.6	33231.7	42646.3	34853.1	28788.8	30262.8	25158.6
P15954	COX7C_HUMAN	Cytochrome c oxidase subunit 7C, mitochondrial	COX7C	6	2871.48	6741.04	3302.65	12201.1	13779.5	15107.3	7578.38	8898.48	9888.4	8708.07		6806.92	8557	8589.75	8036.81	7191.52	7479.14	4163.72	809.206	7000.78	4894.11	9159.11	7355.67	7848.99	9874.14	10799.7	2328.06	6994.45	6708.92			628.667	656.462	4429.88	940.709	2906.17	11503.6	11100.2	4689.5	9714.67	7625.91	8813.55	1989.56	10433.3	8044.62
Q9H7M9	VISTA_HUMAN	V-type immunoglobulin domain-containing suppressor of T-cell activation	VSIR	3	2611.2		13603.3	307.59	256.861	344.666														143.078																		257.4
P52907	CAZA1_HUMAN	F-actin-capping protein subunit alpha-1	CAPZA1	29	68417.5	68785.6	63972.5	25588.3	34279.9	30599.9	61784.5	61540.7	30813.8	53174.5	38548.9	49976.6	33167.3	68737.1	74057.1	51347.8	32938.1	42215.3	47750.1	40581.8	58876.3	40202	67362.2	51137.8	56032.9	52755	64783.3	58336.7	74323.4	18794.1	27475.5	15963	35156.5	57005.6	61828.8	71899.9	36723.4	27282.6	20984.4	25886.9	34319.1	34106.8	25356.8	27089	27952
Q96GS6	AB17A_HUMAN	Alpha/beta hydrolase domain-containing protein 17A	ABHD17A	8	358.435			47410	1059.71		1542.42		1261.98				99323		92115.7	95994.6		452.206				91224.2		96954.9	97644.3	681.407	1033.24	131280	133123	123755	127469	125357		166.49		1022.03	82965.7	79929.4	82922.3	68742.6	68616.2	68698.1		1561.1
Q01459	DIAC_HUMAN	Di-N-acetylchitobiase	CTBS	7	1125.99		708.498									8717.17		95.7909	233077				25371.1		89.6482								1086.17					619.327	777.085	349.696							192.735	235.911	275278
Q05513	KPCZ_HUMAN	Protein kinase C zeta type	PRKCZ	11	1526.81	2425.02	2480.7	949.199			2300.43	4671.11	2137.69	7731.57	2226.31	1599.79	6166.93	1538.96	7111.55	1788.03	1437.35	1172.33		4307.86	5808.97	5864.82	1923.51	2741.85	1912.4	4690.3	2763.72	2966.53	7200.02	2947.08	9856.65	4778.31	5218.45	2698.05	2122.59	2601.78	6108.52	5282.7	3415.92	4869.8	9406.49	4329.74	3350.79	3418.37	3382.04
Q6UVJ0	SAS6_HUMAN	Spindle assembly abnormal protein 6 homolog	SASS6	26	4912.56	4316.5	12684.1	23877.7	19954.2	6715.82	8272.01	3525.75	8444.71	8078.83	15724.5	6683.37	1436.84	5069.96	1950	1727.62	8327.13	6701.83	9433.33	1550.45	8092.55	9055.35	7351.02	13992.3	8913.61	18248.5	11233.7	11426.6	10537.9	6454.44	6045.83	7122.25	7059.68	4979.86	4675.6	3272.54	14162.4	28836.6	30594.2	16068.3	16332.5	17926.1	19576	12226.9	13118.5
Q03405	UPAR_HUMAN	Urokinase plasminogen activator surface receptor	PLAUR	8	1632.23	2076.37	3579.46	1478.11	3339.52	4021.03	447.116	4239.09	347.72	616.366		7735.31	3195.75				1557.87	3019.9	1721.62	2158.32	2374.55		2356.16	3236.63	2798.72	2954.42	3296.5	481.186	1061.07								2992.45	2123.36	1963.89	1410.29	1304.99	1643.76	2179.81	17768.5	2323.65
O75915	PRAF3_HUMAN	PRA1 family protein 3	ARL6IP5	9	43302.2	38345.2	43927.7	596.086	19210.8	23003.5	164.101	5264.01	27858.3	1512.68	1857.5	9052.33	1690.2	3874.88	7393.74	7205.06	13631.4	18256.8	14606.2	4832.85	3328.55	656.625	18852.3	9570.07	20483.5	718.136	8826.81	1435.7	786.684	114.827	1017.47		1258.23	5602.51	4553.22	10006	10644.3	9249.83	9851.33	7939.94	7978.24	6314.32	9375.48	11178.2	7643.06
P10599	THIO_HUMAN	Thioredoxin	TXN	35	150016	214631	254912	240077	251151	235516	366472	438192	368094	406077	339948	300856	421022	340668	251566	367127	295946	300280	356168	292479	320293	318415	306210	328268	263854	329657	561505	572651	545288	4162.07	1285.28	3855.44	78446.4	339310	481231	444615	250932	244367	150544	240370	265162	275901	241772	274358	272231
Q9UHI6	DDX20_HUMAN	Probable ATP-dependent RNA helicase DDX20	DDX20	39	3662.31	5104.12	10461.9	1257.33	4475.91	4332.29	20606.3	26841.4	6859.94	46214.8	16380	25968.2	7441.85	6034.3	18620.6	7253.68	5836.15	10025.3	13882.5	23246.2	4582.15	6374.8	7526.79	16259.3	36335.7	19921.2	4798.58	6610.61	2722.7	797.59	7451.65	38806.1	12969.4	6882.06	19462.4	8199.16	7388.85	8016.93	4439.05	4293.66	6388.46	7844.82	2302.48	13972.7	2709.03
P00395	COX1_HUMAN	Cytochrome c oxidase subunit 1	MT-CO1	6	8196.86			1364.23	640.939				425.333	1594.98			302.244							486.933		185.132			1687.15				543.022			568.519		6836.08		6423.5				4329.91	3289.68	2920.42	6348.29	379.821	7968.28
P50897	PPT1_HUMAN	Palmitoyl-protein thioesterase 1	PPT1	18	51689.3	50193.9	47855.2	6149.67	6995.74	380.71	12484.3	5114.85	5503.64	7787.75	41826.2	3441.07	2205.21	3579.84	7899.9	3122.83	7203.41	9300.48	3655.47	9602.52	15204.1	15418.8	3535.81	4878.44	12643	7134.08	988.331	13006	5316.47		693.337	3432.69	13686.4	6934.99	7411.59	6737.13	8198.2	10712	9848.81	8729.28	9312.7	10210	8271.68	6289.67	7124.5
Q9BYB0	SHAN3_HUMAN	SH3 and multiple ankyrin repeat domains protein 3	SHANK3	6				4858.29	1535.22					198.622			1949.42	1529.06				1052.59										6733.35	1784.04	186.32	150.967	272.656			122.79		2698.48	802.863				202.357	404.132
Q8IXK0	PHC2_HUMAN	Polyhomeotic-like protein 2	PHC2	14	6620.55	2087.29	2131.93	6617.01			4846.85	239.872	3678.91	5623.16		122.401	9126.73	257.113	163.25		1574.03	105.462	465.834		116.857	4638.27	48410.7	6242.13		250.744					4600.98		4461.39	162.342	1844.86		4011.01	4370.5	52869.8		483.515	2849.66	1500.11	9212.83	649.341
Q9H0I2	ENKD1_HUMAN	Enkurin domain-containing protein 1	ENKD1	9	4856.62	1278.53		429.528				709.772	370.726	5867.73		1317.35		2057.57		1659.56			359.657	850.088	370.467		789.534		765.931	372.77			787.569		3649.08		39355.8				796.71		2133.75	639.634	425.568	412.066	24258.4		2941.36
Q9NTI5	PDS5B_HUMAN	Sister chromatid cohesion protein PDS5 homolog B	PDS5B	75	14040.9	10100.4	9498.01	2355.44	44510.6	35833.4	17866.8	18891.7	16014.8	14575.3	68719.3	16087.5	21669	26217	24734.8	19006.6	17841.3	13859.9	20116.7	9997.64	16194.5		11873.8	12060.1	15552.8	16675.2	26848.1	11942.2	15670.6	9753.23	10921.7	15922.3	2064.7	14369.5	12990.9	13861.7	16573.5	20105.1	19527.7	22647.4	17949.2	21211.7	13508.6	11990.6	15755.2
Q04446	GLGB_HUMAN	1,4-alpha-glucan-branching enzyme	GBE1	40	1496.47	5924.7	30841	1935.57	1553.54	1759.34	15197.4	13219.6	14820.7	21147.4	8319	19809.6	23284	21196.9	27617	28266.9	14406.3	15178.4	5644.1	20827.9	12166.8	3417.94	17853.7	8225.23	9688.27	8838.84	20082	8793.54	22913.3	6675.56	4532.36	5070.9	5512.75	6211.08	13452.3	15157.5	1826.36	7281.16	18428.8	410.683	846.129		262.55	1577.59	236.888
Q13347	EIF3I_HUMAN	Eukaryotic translation initiation factor 3 subunit I	EIF3I	45	74243.3	77632.8	85491.4	52537.2	64110.1	44243.5	74134.2	62226.7	55011.8	61520.5	24182.2	58612.9	54978.6	56721.8	58637.2	67592	59285.2	69768.7	60550.5	72530.1	81457.8	34107.3	75709.3	86629.9	67657.7	73257	69774.1	71341.4	68601.7	44069.5	40939.4	44439.6	31843.4	59627.8	63959.2	57987.6	52165.1	50071	65597.7	55786.2	57553.8	51788.4	40770.8	54569.9	54347.8
Q969M1	TM40L_HUMAN	Mitochondrial import receptor subunit TOM40B	TOMM40L	6	1069.67	2153.15	1157.88	4367.38	3300.44	3849.68	302.938				507.295		664.09	225.612	686.34		424.649		488.464				180.038	437.403					177.166									141.257	1869.38	3995.25			185.153		468.423
O60518	RNBP6_HUMAN	Ran-binding protein 6	RANBP6	50	26446.2	21869.6	15895.6	10699.7	32247.1	7457.44	17163.9	24646.4	45109.3	22415.8	19205.6	28061	44437.3	10613.5	17225.7	8078.92	12074.4	13233.4	18348.9	12442.2	25136.8	644.24	35508.7	19796.3	23131.1	27319	9928.1	13986.4	10964.4	666.426	467.192	10614.2	54880.4	1773.76	4666.2	1129.16	49172.2	2849.3	35006.7	5728.1	11522	6720.72	21525.6	7885.24	10123.7
P00738	HPT_HUMAN	Haptoglobin	HP	2		5907.9			8248.81								7272.11		250.101	197.466									3469.99			1369.66	4591.8	494.417					1250.6			5486.98	356.862		95.2313
Q15652	JHD2C_HUMAN	Probable JmjC domain-containing histone demethylation protein 2C	JMJD1C	62	1733.55		7638.57	26518.5	4281.31	10528.7	24940.3	4096.13	4113.61	2111.08	1235.09	1352.41	39061.2	1613.9	87668.9	16698.6	4193.2	2122.8	4204.34	1333.33	8924.85	1250.26	8089.44	15783	5872.35	2357.15	10987.2	4318.77	5018.94	2311.9	2452.09	6056.98	1027.86	17573.7	11335.3	4598.24	6424.62	17508.2	18405	4438.33	13362.5	10621.8	15724.4	6427.98	15716.3
Q15572	TAF1C_HUMAN	TATA box-binding protein-associated factor RNA polymerase I subunit C	TAF1C	21	86.1004		682.173	7669.82		3466.16			558.478	100.801		10075.3		13052.4	712.352		1412.52	139.363		203.354	394.756	115.389	585.763		10578.3	17884.8		87.8418	728.098	2607.86			9755.11	8909.85			1186.76	1197.96		419.439	1570.14		1006.17	234.064	472.38
Q9H3M7	TXNIP_HUMAN	Thioredoxin-interacting protein	TXNIP	13	5156.55			10759.1		1619.35	2658.33	1402.97	3538.42	6489.31		2658.63	8627.69	6753.42	4781.16	6093.13	4746.43	4432.51	5287.37	4021.25	4616.33		6404.74	4215.59	10019.5	4824.93		1358.74	1405.2								13412.7	977.357	559.332	767.757	326.249	177.89	182.423	579.563	428.834
P14868	SYDC_HUMAN	Aspartate--tRNA ligase, cytoplasmic	DARS1	76	217208	207164	153026	200631	164336	157108	163499	119637	134997	119514	80391.7	197546	210523	101215	129560	109539	113405	174392	110855	153080	85202.6	85345.9	130725	148261	165027	130062	70746.1	75547.2	64236.5	27586	50093.5	41785.8	76349.6	43617.8	45550	42935.8	55483.1	59601.5	47495.1	61044.5	41323.7	92865.5	54332.7	55493	36564.7
Q9BV57	MTND_HUMAN	1,2-dihydroxy-3-keto-5-methylthiopentene dioxygenase	ADI1	28	19407.7	11138.3	16597.5	6512.87	5330.96	3078.25	9671.22	10208.6	8828.84	9502.96		10116.6	11230.1	7427.07	10536.9	4528.37	1271.28	54878.2	5701.51	12680	2441.94		2951.21	6313.45	4362.54	2812.73	12596	11994.1	37271.6	3173.7	2381.93	2820.71		7185.92	66978.8	10613.1	6687.48	10725.6	33664.6	7974.3	6822.81	7219.89	5500.83	9515.44	11677.9
Q15717	ELAV1_HUMAN	ELAV-like protein 1	ELAVL1	46	123449	116578	139242	101430	76277.6	106062	90183.4	91749.6	80794.3	90026.6	49036.3	83074.6	84209.5	82201.4	76079.5	88435	89237.2	83838.9	91411.4	103057	100225	27319.9	87089.9	126767	103649	98758.4	68782.1	77354.9	115488	68181.2	74965.3	71271.1	36944.3	70935.7	69786.7	89865.4	62286.6	63829.8	76742.4	55743.8	56280.5	52459.5	86448.5	57134.5	51097.7
Q8WUQ7	CATIN_HUMAN	Cactin	CACTIN	20	6645.08		6198.95	6595.1	10507.6	2354.31	4473.32	2164.28	5756.69	7242.17		3630.92	6679.91	81042.6	11915	7807.15	1427.13	5723.21	3470.29	10729	6816.42	11755.1	2559.3	28751.2	10594.3	9513.91	30506.9	24088.9	9271.72	10638.6	6834.04	1222.48	364.511	1809.4	11294.8	32215.9	13099.2	12237.2	15843.6	925.366	12501.5	11693.6	1207.81	1935.88	1564.01
P52298	NCBP2_HUMAN	Nuclear cap-binding protein subunit 2	NCBP2	9	3389.21	4365.06	971.971	6466.74	6183.7	45423.8	9979.76	9381.7	7490.68	13053.9		8119.42	4961.16	5893.27	8316.65	12525.9	9007.2	12113.4	16557.2	7041.79	9134.44		9389.04	10075.9	8288.22	10590.2	6557.65	8532.85	9518.34		3145.52	1079.03	433.979	12646.9	7780.65	9589.35	5811.35	4944.73	6800.28	6915.03	9819.52	9283.73	4898.72	6149.96	6156.11
P28482	MK01_HUMAN	Mitogen-activated protein kinase 1	MAPK1	34	25782.4	20315.3	21721	79812.5	67848.4	29976.1	107819	96795.8	36717.9	58215.8	11987.4	31189.3	100956	29969.8	59873.9	37725.8	28108.2	41209.8	42412.7	97324.1	32360.6	18145.7	34325.6	41239.8	34252.2	67147.5	26686.4	27922.2	31073	7221.29	4216.27	3495.28	16494.4	64750.3	29245.2	29584.2	14625.8	28132.4	20743.6	18744.5	14019.6	13107.8	15700.3	20918.9	13944.4
Q9UPR3	SMG5_HUMAN	Protein SMG5	SMG5	19	590.184	2516.79	1984.99	519.524		3275.88	638.253	1101.66		21234.7		15595.9		637.173	2307.72		1588.94				1892.49	10826.4	142.575				4050.79	386.844	2566.62		23793.4	10628.1		1558.63	2327.13	11728	3713.57	119.401	175.749	301.946	395.414	450.465	4077.14		173.032
Q6ZU35	CRACD_HUMAN	Capping protein inhibiting regulator of actin dynamics	CRACD	17	26065.4	36685.5	3481.53	27074.8			649.452	2699.75			12427.2				343.145		2319.93				180.863	1384.8	6489.67	4011.13	135.974	4368.28		4566.05	289.383			142.445	1840.52		2115.78	279.662	641.469		60.6031	478.571	4464.61			3087.14
P63098	CANB1_HUMAN	Calcineurin subunit B type 1	PPP3R1	10	8389.57	13816.9	18313.4	8791.95	9163.7	6474.54	6795.3	7510.43	7692.24	4765.72	3829.85	7647.48	10509.2	6284.01	7192.97	6591.77	6626.05	6055.28	2713.22	3017.03	12990.3	1035.87	8288	7363.78	6259.14	6425.56	11767.5	10418	13175.7	9661.76	5785.09	4276.94	16078.8	5085.59	9910.64	9777.14	9495.18	9872.95	7943.62	11178	2907.25	8061.66	8702.12	13676.9	11585
Q6RW13	ATRAP_HUMAN	Type-1 angiotensin II receptor-associated protein	AGTRAP	4	9160.86	10862.4	10853.8		643.153				549.785		3237.92						1666.24					3370.69	437.19	1409.41			40794.7			6172.8	8431.22	8470.46	3834.31		6843	9963.16	9226.14	2298.09	9185.64	9233.64	10529.8	11090.6	7675.3	7217.11	7875.29
Q99570	PI3R4_HUMAN	Phosphoinositide 3-kinase regulatory subunit 4	PIK3R4	54	31361.2	27142.8	36184.6	29704.3	51145.5	19007.7	50099.7	22228.5	19307.5	18756.2	14877.7	22761.2	29930.9	26248.5	28269	24019.7	30399.4	26922.7	52095.2	24951.8	26477	45260.8	23201.4	20693.5	25829.6	29183	16292.4	23426.5	19027.5	17765	16552.6	29993.5	12628.4	33802.6	56586.8	27343.9	19741.1	25521.9	53602	34638.2	46551.6	44340.7	39764.9	23791.1	23510.8
Q8IVS8	GLCTK_HUMAN	Glycerate kinase	GLYCTK	6	1795.25	1822.9		6035.59	2306.68	2084.84			311.383							5436.63				597.251				2573.76				330.996					404.587		2299.24		126.174			393.189	5923.65	5833.02	583.908
Q9H9S5	FKRP_HUMAN	Fukutin-related protein	FKRP	9	1260.47	1961.45		2672.15	3994.45	3101.49	161.291				2466.01	20860.2		1528.53		830.611	15627.6	291.592	211.674	4070.11			1032.75		229.238			249.437				145.662	360.153	35719	736.926		426.295		750.511	1555.14
P02549	SPTA1_HUMAN	Spectrin alpha chain, erythrocytic 1	SPTA1	5	111.299					182.106		2708		3428.44			2558.46		4275.59	3132.61	413.046						1367.3		130.296			747.798	852.383			328.237	3875.56			283.976	342.673				1091.81	230.241	348.667	139.011
P30419	NMT1_HUMAN	Glycylpeptide N-tetradecanoyltransferase 1	NMT1	37	6658.55	2031.38	10527.2	12640.4	3638.57	13578.6	19228.3	25048.4	23703.2	21471.2	19767.7	112346	21189.7	19665.9	18432.8	19902.9	30743.4	11508.8	15239.1	15242.2	17133.9	16808	11240	11121.5	10926.4	11871	25828	24549.6	28439.6	27108.7	24115.8	27250.8	24247.1	25865.8	27133.3	24243	17503.1	11305.5	19486	7629.95	6684.56	8588.28	8776.16	6028.05	27217.7
Q6P996	PDXD1_HUMAN	Pyridoxal-dependent decarboxylase domain-containing protein 1	PDXDC1	45	5869.41	10856.4	7290.24	16704.4	14335.7	4216.26	14958	16755.3	9642.51	15383	16675.2	19011.3	12727.7	13402.1	20668.1	4943.28	21883.6	19574.9	19299.8	18007.7	24828	1761.68	14126.5	28101.1	36857.4	36095.2	29261.1	32282.2	57733	45919	12497.3	47344.9	2967.39	12413.7	39274.1	47871.7	35892.1	36632.9	34765.1	31478.4	33151.9	26471.7	29050	27075.2	22660.4
Q8TED9	AF1L1_HUMAN	Actin filament-associated protein 1-like 1	AFAP1L1	3						205.184	328.538	196.412	518.1	344.824					241.927			494.358																268.064							297.464	45.4093
Q969M7	UBE2F_HUMAN	NEDD8-conjugating enzyme UBE2F	UBE2F	6						199.768												3239.55	5699.76	1717.87				1173.31		20627.2									358.204	457.327				385.806
Q8TCG1	CIP2A_HUMAN	Protein CIP2A	CIP2A	38	297287	8547.82	8165.65	16966.6	16617.4	3297.79	7116.3	12784.1	15887.3	7782.57	4972.93	9311.17	6832.63	5746.67	18154.5	11363	2385.1	10026.4	12255.3	8657.31	9331.65		11125.6	12786.5	14882.9	15844.6	6517.51	5430.15	7405.86	7181.05	5641.95	4952.77		18627.4	6204.91	8320.32	16723.4	11748.9	7779.11	10018.2	58905	35928	12484	18829.1	6355.65
Q8TCG2	P4K2B_HUMAN	Phosphatidylinositol 4-kinase type 2-beta	PI4K2B	20	213.744		10863	23209.5			12228		2163.05	3844.71	1219.97		867.242	1261.02	6304.15	2462.2	776.807	1715.97	1198.06	342.202	387.837	15859.2	15975.9	10013.8	6954.8	2129.64	6745.4	1608.07	2460.31	3453.02		222.521	1369.86	11240.5	4352.11	11428.4	2385.42	230.387			801.572		407.879	9553.06
Q99536	VAT1_HUMAN	Synaptic vesicle membrane protein VAT-1 homolog	VAT1	44	376499	324515	311031	252128	249773	251289	67127.3	37846.9	55016.9	48237.2	132083	22400.8	47454.6	16000.8	23125	21096.3	42320.4	37014.9	41571.8	43064.8	35174.8	114889	55376.2	27218.1	36134.2	84893.2	36089.1	75061.2	46342.8	222457	30856.4	230118	199656	56496.9	51063.4	58796.5	55165.8	51686.7	68777.2	30900.5	53767.6	50040.7	58463.2	45590.8	46861.3
O95273	CCDB1_HUMAN	Cyclin-D1-binding protein 1	CCNDBP1	9	7287.15	8697.8	8099.88	8902.93	9452.21	7269.69	1238.06	628.849	481.382	279.083	3570.12	48.5495				239.152		324.39		480.015	80.446	4693.03	795.41			361.99	461.678	102.939	5087.56	403.154	295.223	362.676	8317.88	656.23	2782.57	174.861	146.914	312.665	351.287	1540.62	387.127	472.749	1700.23	185.75	1849.81
O60890	OPHN1_HUMAN	Oligophrenin-1	OPHN1	25	2541.14	2711.61	5378.35		3334.02	1224.23				935.029	395.975	10543.8	14673.2	803.888	73457.4	10463.4	9523.07	10860.3	2315.73	11801.8	333.92		9161.85		7296.91			108.27	1045.03			538.424	850.815	28297		32340.5	586.462	81.9625		968.663			1564.19	1816.66
Q9NX05	F120C_HUMAN	Constitutive coactivator of PPAR-gamma-like protein 2	FAM120C	27	867.636	389.603	1076.55			1683.12	85234	7657.77	6896.43	5608.74		69341.1	6497.57	12175.4	4064.82	7389.45	2703.71	11263.3	3310.21	2847.3	3374.66		4669.4	3844.22	5523.27	10116.6	7257.63	8461.22	7112.57	4720.8	4751.3	4772.92	504.381	5782.53	10518.8	5643.26	8134.43	22362.9	5989.47	5516.89	3294.37	8336.04	7169.66	3593.46	5170.88
O95625	ZBT11_HUMAN	Zinc finger and BTB domain-containing protein 11	ZBTB11	26	5969.06	24226.7	16992.8	8655.88	716.331	373.99	270.438	395.399	287.148	3377.01	18432.4	15925.3			216.284		1565.93	4186.75	1341.08	6351.51	21922.1	507.126	2356.22	888.613	1993	1475.17	2899.14		1079.73		2527.17	1318.33	375.066	483.08	738.509	8293.55	1972.02	1963.1	2970.47	1678.68	1833.97	3058.17	4226.71	1803.7	1947.59
Q9H2D6	TARA_HUMAN	TRIO and F-actin-binding protein	TRIOBP	34	952.196	1391.26	24156.7	1848.83	6918.92	3578.84	5859.16	3273.36	3209.09	1249.95	3474.8	5508.02	3510.81	7681.7	11222.4	7014.4	5171.11	588.111	2341.18	2472.87	4080.22	6824.69	9480.53	3317.15	1758.92	3915.08	3956.17	2023.69	1566.57	1522.49	1482.18	1811.74	3391.77	3216.04	4127.98	4031.22	8530.79	4591.49	3842.83	2351.86	1357.69	1177.89	4725.04	2692.13	693.87
Q7Z4F1	LRP10_HUMAN	Low-density lipoprotein receptor-related protein 10	LRP10	9	4561.01	153.344	1966.5	234.972	1073.86	1177.54			170.404	204.998	322.218	648.839	264.803		489.278	738.862					385.255	427.141			740.605	1218.98	581.356	357.201	395.972	602.864	624.858	555.989	627.251	563.613	397.219	252.111	554.62	1264.59	1750.18	597.92		312.896	240.226	417.807	160.029
Q8WVB6	CTF18_HUMAN	Chromosome transmission fidelity protein 18 homolog	CHTF18	43		35080.3	42302.1	442.303	2118.91	4252.7	20279.3	5204.9	5014.02	10788.2		4082.77	3339.36	2890.76	2781.74	6057.43	9069.3	17950.8	3649.1	38385.1	61937.3	939.66	4763.43	5594.75	5594.84	14661.3	2881.07	3561.23	5643.28	8824.28	14777.2	14413.1	156.702	3350.17	55761.7	4305.72	28667.2	5640.66	8118.56	5828.24	4920.14	6345.14	5061.28	10512.3	4728.03
Q9H8X2	IPPK_HUMAN	Inositol-pentakisphosphate 2-kinase	IPPK	15	128177	129520	129804	155567				2678.33		16732.2	13882.7	4994.29	12192.1	4445.21	1248.03	3812.54			29027.8	3892.27		14065.2	664.839	10292.9	264.762	692.778		665.585	595.326	507.958		508.884	570.914	465.244	179.684	950.754		2280.63	3516.73		1587.35	6666.42	1240.15	28417.9	7325.77
P0DPD7	EFMT4_HUMAN	EEF1A lysine methyltransferase 4	EEF1AKMT4	12			291.437			189.174	5820.37		439.166	595.315	5804.61		424.569	566.707	339.565	361.378	197.086	236.76	19824.5	427.996	448.205	233.138	754.165	875.28	26005.5	1762.44		280.158			332.037	3132.63		401.573	1243.51	3964.46				470.846	383.797	542.766	13230.3	5977.03	449.602
Q8TAQ5	ZN420_HUMAN	Zinc finger protein 420	ZNF420	5	23948.7	21510.2							1977.38	5699.36			7105.72		6557.27		255.688	324.786	248.683		9513.32		714.073					166.854									12827.4					1121.02		693.82
P43629	KI3L1_HUMAN	Killer cell immunoglobulin-like receptor 3DL1	KIR3DL1	3					119.554						151.733	6807.32																	118.571															523.42
Q13163	MP2K5_HUMAN	Dual specificity mitogen-activated protein kinase kinase 5	MAP2K5	7	570.275	396.214	156.013	441.737		418.569	157.541	957.949		4872.49		265.746	4696.72		663.845	1628.49	97.143										1482.43															297.297	442.046		80.0533
Q86WI1	PKHL1_HUMAN	Fibrocystin-L	PKHD1L1	3							4255.73						1566.42	1503.46	1453.15	5521.57	1687.25							5579.71				1124.23										1633.48	1848.03	672.461	727.352	848.178		1840.22
Q9BY66	KDM5D_HUMAN	Lysine-specific demethylase 5D	KDM5D	25			443.157	2024.63	660.857		3365.56	12000	1540.6	4098.87	10541.7	3660.17	1294.14	10807.2	2641	3228.85	7792.32	9254.79	1055.24	3187.48	2174.5	2140.7	18297.9	22154.7	6211.72	4420.1	330.056	5463.66	11959.3	34419.1	1482.18	116923		1106.95	6429.03	1593.13	1634.08	5677.07	11517.4	3953.23	5260.17	3743.72	2792.32	15096.6	2619.52
Q14687	GSE1_HUMAN	Genetic suppressor element 1	GSE1	33	468.632	891.316	7446.9	1590.33	6613.3	1918.34	10608.4	18346.8	15637.4	9577.19	1545.07	9390.76	17234.5	7149.91	33427.3	7057.64	6305.76	10831	311.081	10259.8	10456.8	233.572	7845.21	1856.23	9607.73	2661.44	12639.5	11753.2	22103.2		311.762	1054.12	465.331	938.429	714.461	13691.7	2031.39	2020.9	4351.68	673.97	4406.78	2649.67	1557.01	2823.34	539.569
O75896	TUSC2_HUMAN	Tumor suppressor candidate 2	TUSC2	4																				3186.93	370.336		339.39					1927.89				107.071				288.88			834.983			39340
Q8TF64	GIPC3_HUMAN	PDZ domain-containing protein GIPC3	GIPC3	10	5077.94	888.945	1512.62		1592.03		1262.33	5510.27	4676.3	7102.09	668.15	6715.93	17965	22550.7	5336.56	11091.4	4470.21	26963.5	2821.45	4827.65	5876.65	908.476	13500.8	4667.96	1453.16	1456.91							221.959		1933.53				6337.98
Q8NHZ8	CDC26_HUMAN	Anaphase-promoting complex subunit CDC26	CDC26	5				244.857				3499.93	1230.87	210.696	5005.36													342.191													182.475
Q9BY42	RTF2_HUMAN	Replication termination factor 2	RTF2	15	5771.98	1218.35	3112.45	829.182	660.665	573.983	5185.82	4826.43	3436.77	4856.93	365.865	4274.43	2062.51	2526.51	5043.19	1768.19	4568.99	6017.77	6976.07	7302.59	26311.2		7880.99	8131.29	7143.31	33439.1	5918.57	7534.56	6199.34	3367.3	3269.1	3371.34	1716.67	5228.46	4933.53	25121.4	10696.3	14580.4	13388	11873.2	16517.2	11818.1	6462.08	9750.63	7414.43
P98194	AT2C1_HUMAN	Calcium-transporting ATPase type 2C member 1	ATP2C1	31	52247.8	43779.5	43133.8	32070	36361.2	31060.5	15257.2	572891	188251	7480.55	9058.56	4998.61	556595	5608.31	2346.28	3183.04	395641	6018.39	8803.51	5814.84	22099.2	6993.3	6013.9	7652.48	7720.23	8296.34	17838.9	23270.2	9824.17	5586.73	3130.01	4365.81	6703.37	2681.54	9350.24	5362.17	13730.9	8422.84	14798.1	9431.25	8988.87	10971	7797.13	4274.75	6767.58
Q9H1C4	UN93B_HUMAN	Protein unc-93 homolog B1	UNC93B1	5	354.825		1763.29	3001.15	498.42	838.753	200.187	257.14		102.919		159.37		7702.32					201.297	68.1775				510.385	846.086	386.058	801.342	960.972	899.855	2036.72	919.903	900.888		626.331	729.972	1205.22	242.882		619.366	289.624	649.811	501.054		116.844	267.941
Q8TDY2	RBCC1_HUMAN	RB1-inducible coiled-coil protein 1	RB1CC1	40	5663.64	3043.67	1676.23	717.702	49832.1	949.594	2324.56	6406.68	13296.3	1074.96	485.908	932.342	5691.41	1955.71	5910.6	2477.03	3319.15	9676.04	7903.21	6793.34	60341	1304.08	22083.1	1368.59	6561.45	17110.7	1488.84	3657.5	3134.78	2331.31	46227.4	3317.2	24937.8	35841.2	1758.44	13193	3876.15	3345.15	7243.07	6804.33	3844.69	151.53	1710.05	2811.25	239.096
Q9UKL3	C8AP2_HUMAN	CASP8-associated protein 2	CASP8AP2	18				1253.13	12052.7		632.827	4374.41	3220.92	6885.45	387.495	5180.93	6502.38	7136.64	6193.71	10444.8	2809.94	6540.86	3262.71	5410.6	4014.94	1711.41	3152.43	1745.46	992.321	12460.5	4456.35	4766.64	4690.46	558.458	1567.25	910.438		1042.54	395.057	2180.42	849.264	4984.04	1036.05		736.17	7007.89	597.109		515.813
P15848	ARSB_HUMAN	Arylsulfatase B	ARSB	7	1574.38	1784.46	657.011	933.519				85.4669			1406.84	403.744			2657.44	2467.75	402.753	476.79		1940.85	2454.43		7354.53	540.292	1970.95	1568.48				2541.48	2249.93		303.057	295.049	377.069	1360.09	281.754		469.728	501.694				282.99
O43815	STRN_HUMAN	Striatin	STRN	42	9799.74	37932.6	9725.86	11001	2544.93	14904.5	14219.9	38197.9	15556.5	4460.87	1246.78	8181.44	13455.2	11491.3	11588.8	11286.7	12253.9	12098.2	11538.9	201264	12097.9	1391.94	8676.16	10025.5	6546.68	11573.3	5380.43	11735.4	8392.45	1263.84	3090.3	2077.01	5634.94	9992.94	9211.14	4893.15	14850.8	6005.87	17504.3	7238.41	9285.18	8279.44	10495.8	4403.35	8175.76
Q9H1C3	GL8D2_HUMAN	Glycosyltransferase 8 domain-containing protein 2	GLT8D2	7			2667.24				12799.8	155.042				5544.86	235.957			3915.08	96.6984	5652.74		6424.93			1298.89				633.358							681.021	3318.26	87.6768			213.814			606.148	378.037
Q7L5L3	GDPD3_HUMAN	Lysophospholipase D GDPD3	GDPD3	10		512.893	130.968	10498.6					207.883				11647.5	1820.92	6718.59	322.543	2166.88		579.969				5552.95		2487.63	1253.07						8270			3349.52		911.517	937.438	828.827	386.163		511.506	1993.28	1438.25	846.682
P33121	ACSL1_HUMAN	Long-chain-fatty-acid--CoA ligase 1	ACSL1	46	24667.8	25327.2	12448.4	37531.3	20533.5	12351	4688.28	15416.3	13228.2	6695.24	2803	20010.5	13536.1	7675.6	12451.1	13571	24624.6	10455.9	24031.8	14747.5	16476.6	4732.81	46862.2	16642.6	17895.1	4434.31	26038.3	73677.3	63606	14711.4	3442.57	3387.19	3797.4	35936.4	12598.8	67785.6	17678.5	13570.4	25117.1	33609.2	6562.23	15003.4	12085.4	14737.4	9341.16
Q9BYE2	TMPSD_HUMAN	Transmembrane protease serine 13	TMPRSS13	3																					430.209		981.642	920.2		894.1											449.203					368.573			247.489
P32780	TF2H1_HUMAN	General transcription factor IIH subunit 1	GTF2H1	24	8287.81	8129.32	8430.91	5597.89	1047.41	4555.83	1225.53	2148.38	9459.61	1478.89		594.867	3245.07	1209.47	1354.23	1910.63	2407.17	2211.9	894.758	3712.89	2263.15		2460.73	2010.82	2775.66	1611.55	835.226	2060.34	1257.63		2470.12	4660.8	663.815	1361.21	837.691	1140.97	3554.02	3001.9	2024.89	3391.49	2396.09	4215.81	3851.41	1483.5	1818.73
O43399	TPD54_HUMAN	Tumor protein D54	TPD52L2	38	89867.8	97505.1	99627.8	64305.7	65777.9	63449.3	46033	43060	30313.3	89137.6	89169.6	55535.1	60346.3	79340.7	101538	37671	49039.2	35748.3	25066.8	24625.2	27268.1	81663	24937.5	127023	149287	65124.4	100698	60786	93964.8	27774	31067.4	29584	56453.7	40184.4	40213	67720	22445.3	25320.7	53884	42185.6	42407.9	44679.3	38495.6	43723.2	64182.1
P08240	SRPRA_HUMAN	Signal recognition particle receptor subunit alpha	SRPRA	46	48581.6	152573	146048	22974.7	29282.5	36064.2	29180.1	25683.9	21460.2	37902.6	33037.2	28137	42254.7	17181.4	17569.4	16086.2	30113.4	23774.5	30161.1	26554.1	66956.5	40459	40806	35083.5	24405.2	41706.6	10519.8	10148.9	30670.2	1683.51	2047.63	13927	9977.14	7452.57	3622.54	7559.02	7673.22	31589.4	45931.4	27885.5	19729.9	42206.7	29978.1	19943.6	27120.8
P31641	SC6A6_HUMAN	Sodium- and chloride-dependent taurine transporter	SLC6A6	11					1961.99		445.457	2223.56		2663.29		1982.63	2899.11	1727.38	1047.24	587.62		3880.6		1483.76	837.196		855.154			599.526	2793.26	3707.8	3770.45								2191.8		22054.5	9413.89		242.59		10280.4
Q92692	NECT2_HUMAN	Nectin-2	NECTIN2	17	7656.54	6471.28	13756.5	6564.36	462.122	1431.54	3753.7	2542.7	3826.29	3038.18	4483.47	2973.57	2391.63	2566.24	3454.26	5985.92	2252.17	3576.54	1998.24	9545.14	1747.19	5592.89	1027.9	466.502	330.137	395.46	908.096	389.45	2599.48	762.913	10366.1	1516.7	4543.06	1654.16	1003.15		232.896	2499.44	1355.32	2200.71	2058.48	1944.41	1631.44	1749.97	2718.94
Q8IXU6	S35F2_HUMAN	Solute carrier family 35 member F2	SLC35F2	8	3979.84	1458.54	1028.01	1392.74	1826.69	2405.39		1524.55	560.968	668.659		904.725	407.339				927.214	244.654	872.808	949.225	2220.06		1773.65	2006.59	1735.57	1733.13		386.925	643.822						748.275	211.139	2920.34	2120.16	1146.54	2091.09	1944.81	1930.6	1504.44	846.464	641.789
Q96AD5	PLPL2_HUMAN	Patatin-like phospholipase domain-containing protein 2	PNPLA2	10	7731.04	5325.08	6845.05	1000.26	162.872	4238.14	450.121	4821.68	3830.96			1436.69	2888.66		2700.55	3711.46	682.933	3817.15	5809.09	867.928	4182.72		3831.5	5070.69	1186.54	13875.1	2155.98	1445.28	49474.7	3333.5				1097.29	229.089			5128.02	5533.47	4342.1		47.5584		4697.85	327.39
Q9NR48	ASH1L_HUMAN	Histone-lysine N-methyltransferase ASH1L	ASH1L	46	8324.44	26665.7	7368.79	2532.4	5736.08	6026.26	3443.76	4553.66	528.29	5813.19	3552.81	17355.3	11167.1	12689.5	18533.2	886.476	2182.88	7392.5		9107.66	7085.28	626.364	3050	16004.3	320.209	765.552		1423.84	2395.12		1384.39	324.82		272.934	153.795	4448.57	4878.86	688.844	10524.2	1271.06	816.727	13772.8	28124.9	9805.1	2610.89
Q9BVA1	TBB2B_HUMAN	Tubulin beta-2B chain	TUBB2B	191	1426792	1.38084e+06	1.43825e+06	546549	572579	573578	719331	869416	568726	1.11038e+06	439366	693038	746397	785339	723040	821304	947812	856968	1.18856e+06	1.29562e+06	861840	520915	926520	860649	947742	715662	1.10599e+06	974568	1.04664e+06	894226	794471	767452	676808	723196	442780	832215	805522	700546	906014	613089	579089	718088	831846	698351	672289
O75521	ECI2_HUMAN	Enoyl-CoA delta isomerase 2	ECI2	39	38322.8	37382.3	38323.6	37039.8	26668.8	12626.9	11942.5	3927.41	2985.96	2903.8	178898	4871.36	196.045	1779.78	428.515	9266.43	18711.8	1163.17	2232.69	3672.41	16665.8	125750	5616.23	4008.48	25737.5	2163.32	32846.4	31633	35058.7	32643.7	19625.2	5352.48	21824.4	13146	15034.5	42385	43265.2	39299.5	38326.2	143509	45287.9	39291.6	20051.7	29935.5	21624.7
Q9HA65	TBC17_HUMAN	TBC1 domain family member 17	TBC1D17	13	9980.13	9630.07	9868.25	3049.09				25137.2	1240.86			169.688	656.141	1289.69	599.666	841.605	2500.94	1653.99	1966.24	255.14	2836.97	834.565	9112.3	826.85	38.6661	817.514	1565.56	317.62	725.063	694.007		397.891	568.496	443.301	840.456	855.224	5482.52	5533.17	1040.06	451.948	373.966		621.396	3185.4
Q92759	TF2H4_HUMAN	General transcription factor IIH subunit 4	GTF2H4	13	8086.35	8021.95	5898.17	4238.28	4058.34	2813.88	72070.9	398.312	2433.03	1334.84	265.255		120.133			965.742	399.179		2697.88	43952.7	70079.3	10238.8	72141.3	2372.39	2552.7	3615.34	642.816	12290.8	1621.39	977.678	487.323	390.259		1221.18	1028.36	1874.49	1183.27	4406.97	2050.19	5048.12	1464.78	3375.78	1644.66	1379.95	1440.14
Q9H0E3	SP130_HUMAN	Histone deacetylase complex subunit SAP130	SAP130	20	66404.6	59702.3	65031.1		8948.71	8544.96	6663.72	29539.8	14635.9	4353.97		7586.86	16664.7	3693.72	8067.47	6781.19	701.589	2008.56	3168.99	6348.05	2789.79	683.595	4412.86	6626.51	7208.98	11462	3937.22	10053.6	6730.14	3110.06	2622.03	7167.03	643.614	313.972	3567.58	3516.22	2226.22	4830.19	3577.07	1867.29	2501.97	1220.64	283736	3343.72	2210
Q96CT2	KLH29_HUMAN	Kelch-like protein 29	KLHL29	5				74291.8			389.199		154.97		48945.1	95.3457	334.838	479.51	138.854	240.745		279.108	85.5699																333.144		1573.08								15754.3
P22570	ADRO_HUMAN	NADPH:adrenodoxin oxidoreductase, mitochondrial	FDXR	46	290920	293199	307734	133721	156425	135109	33645.3	34889	79279	104545	26248.4	29079.5	24243	18767.8	34354.8	20750	20307.8	18026	17361.5	100822	20974.8	45206.4	26280.8	25623.9	25107.2	27402	6575.65	8742.56	11082.7	2886.96	10166.5	37370.7	45128.9	8676.35	7398.36	4605.29	11837.5	9736.38	15973.1	10957.8	9890.99	9482.43	8976.93	11817.8	24218.9
Q8NEM7	SP20H_HUMAN	Transcription factor SPT20 homolog	SUPT20H	6	204.856		166.902				121.537		131.339	145.258			1316.72	1163.11	1699.18	1396.62		584.073	2519.84	131.94	603.449	2773.26	115.721		122.281			1234.61				257.893			1226.54		4822.14	156.523				283.466	102.351
Q96MH7	CE034_HUMAN	Uncharacterized protein C5orf34	C5orf34	19	1818.64		10291.8					372.653	5674.93		223.3	5846.3	6193.95	4492.15	11026			462.782		1058.58	21.9334		877.97	3040.49		91.5447	11551.3	1548.27	11069.9		133.18			4462.47		2454.63	7315.04	1643.67					449.407	7789.87	300.003
Q6ZNB6	NFXL1_HUMAN	NF-X1-type zinc finger protein NFXL1	NFXL1	32	37465.4	26131.9	19596.3	5708.84	10769.2	9613.21	5040.28	6684.53	4928.8	2292.21	8572.37	8333.8	10067.5	8205	3412.47	2848.49	6282.45	2532.18	2116.01	11308.2	17662.5	8302.01	3599.49	4534.57	6321.7	3384.44	3004.51	4027.9	3914.55	3353.1	4645.95	3165.84	4429.51	6536.99	5048.28	19064.8	6100	13510.5	6261.18	11255.1	9604.08	5909.95	2653.53	4127.15	7167.97
Q15651	HMGN3_HUMAN	High mobility group nucleosome-binding domain-containing protein 3	HMGN3	4							9835.73	1155.94	1178.88	431.527		442.675	1096.95	747.497	519.336	703.121	5309.13	6280.29	1245.73	928.411	613.428		7591.53							1271.05	1315.61	1282.11		762.884	1741.84	674.321	756.368	892.147	839.552	1473.83	864.719	2294.36	368.005	5538.61	376.878
O60662	KLH41_HUMAN	Kelch-like protein 41	KLHL41	5				546.137								4315.75								22746.8		4626.36	785.392					653.159										19736.6	243.633				4334.54
Q9UJ14	GGT7_HUMAN	Glutathione hydrolase 7	GGT7	10	285.164		3309.63		595.019		115.497	253.144	10310.2	17948.4		557.151	380.911		1513.84	1059.07			17373.1	288.641		256.177		140.127	23859.5		349.539			355.402	2391.45		242.979	858.038		311.404	173.017				11115.8	11135.2		489.111
P54652	HSP72_HUMAN	Heat shock-related 70 kDa protein 2	HSPA2	118	877056	962290	1.01454e+06	360909	670612	592618	1.04595e+06	1.01608e+06	831557	913801	137736	1.00695e+06	1.07793e+06	1.00182e+06	589300	863687	818139	658537	875597	833570	947639	470828	1.27156e+06	1.07232e+06	1.15711e+06	1.19833e+06	1.10285e+06	1.20023e+06	985739	316436	391729	503694	520019	939346	751901	748621	944276	897335	683492	607511	356395	561451	663678	650066	601276
P42345	MTOR_HUMAN	Serine/threonine-protein kinase mTOR	MTOR	100	102098	145681	79556.2	10920.1	15484.2	18639.4	20595.2	13413.8	14339.1	50537.5	2324.78	22434.8	22793.2	21160.6	37382.9	20900.5	135921	16909.3	30860.3	29382.2	29080.8	31933	780312	28161.4	21459.8	133039	66304.6	19844	86431.6	19313.2	27052.8	17535.5	30270.4	69109.4	15491.5	15105.3	31945.7	21024.8	34788.6	22053.3	28969.9	92533.8	16970.7	23703.7	21958
Q96EK5	KBP_HUMAN	KIF-binding protein	KIFBP	36	7470.19	6221.73	13969.2	30967.7	10262.4	5829.07	5083.17	24926.1	8997.65	5460.84	159.81	4037.07	5830.13	4596.15	2736.77	3961.48	5428.91	3575.38	3281.83	3125.66	2861.72	1785.15	3878.48	14655.3	3012.78	3649.41	5952.47	8295.67	4267.66	17164.9	17499.2	7897.83	2661.28	6716.7	6452.97	6947.45	17528.5	11657.3	15003.6	15219.3	20454.8	20928.4	16823.8	17194.7	17737.6
Q5J8M3	EMC4_HUMAN	ER membrane protein complex subunit 4	EMC4	7	18098.1	38072.2	24106.8	23752	21224.5	17938.7	6389.4	11065.2	7230.62	21761.8	2117.69	5164.19	6231.1	4818.77	6030.98	25372.4	11532.1	10829.2	10034.6	6961.19	4726.61	11925	8204.21	16778	12443	12530.4	6974.32	5606.66	5484.82	10261.7	13265.2	11254.9	8146.97	9008.94	8327.64	6818.06	18028.4	17924	18035.6	19998.7	25028.4	23899.4	17273	18269.7	15711.2
Q70Z53	F10C1_HUMAN	Protein FRA10AC1	FRA10AC1	9	174.898		1314.21	110929				960.332	420.028			226.06				205.12						1026.63				836.766	22621.8	684.355			317.194	642.531		271.978	573.991					467.147		341.787		3443.61
Q9H3U1	UN45A_HUMAN	Protein unc-45 homolog A	UNC45A	97	179452	157874	96307.5	111695	68994.6	64695.3	48492.4	94760.8	67339.3	37443.3	29173.2	36593.1	101367	33554.6	26052.3	81228.2	77510.5	84306.5	56040.9	91727.2	81717.7	145202	101830	51150.4	174957	72728.2	39092.5	35321.6	28459.8	19992.1	13681.1	22770.9	87493.6	22208.4	21854.2	86797.8	25215.2	20475.9	47509.4	101553	107186	111721	64963.1	15536.4	34924.4
Q15291	RBBP5_HUMAN	Retinoblastoma-binding protein 5	RBBP5	26	5897.79	1772.35	989.716	6719.35	6363.22	6467.74	29361.6	8416.99	8319.19	9219.3	2293.34	8938.69	6980.3	136639	129228	117100	8763.6	6457.87	16876	10889.1	9793.5	21933.9	39931.7	15540.7	10373.5	12187.3	82961.4	74874.8	66009	6608.56	3618.86	1321.51	1593.07	4028.46	20567.4	13740.8	16441.9	8783.67	6763.18	5534.08	7324.14	10204.5	28349.3	9153.84	8833.07
Q9NW68	BSDC1_HUMAN	BSD domain-containing protein 1	BSDC1	16	5466.4	5307.6	7733.26	4799.82	43042.7	3903.44		409.183	656.863	385.46	5336.82			499.561		503.849	2977.84	143.854			636.376	4740.08	1078.43		214.029	768.301	1326.66	3383.14	3212.71	1029.38	4093.18	1802.65	4113.96	1044.75	2693.16	2095.77	2323.44	1302.17	539.679	1494.24		1935.17	1385.89	331.328	1599.53
Q9BRL6	SRSF8_HUMAN	Serine/arginine-rich splicing factor 8	SRSF8	5	4121.45	800.965	3003.41	7908.64	7061.26	7720.88	66689.9	55754.5	59695.8	60375.8	1151.83	63121.9	66669.2	57122.7	53718.1	59864.8	46007.4	43220.9	45361.2	45744.5	50656.5	6917.14	56502.4	47886.5	49620.2	49497.9	53077.1	52634.5	54356.2	16080.1	21259.4	25224.6	7401.82	41892.3	47629.2	45676.1	48877.1	46428.5	48856.7	36748.5	35695.7	37626.8	38947.7	40592	39132
O15040	TCPR2_HUMAN	Tectonin beta-propeller repeat-containing protein 2	TECPR2	15		2262.2	2576.69	6377.42	2488.82		1634.28	169.151			4335.46			405.16		18757.1		3158.86	1461.95		137.658	8622.45			1849.73		1064.66	5527.22	6224.48	237.524		1451.91	407447	2822.13	1911.54	568.659	251.323			4160.18	3072.84	183.055	5156.69	358.97
Q96T76	MMS19_HUMAN	MMS19 nucleotide excision repair protein homolog	MMS19	53	6188.13	8379.05	18430.2	15625.5	15061.3	6103.41	7059.98	24438.9	11658.2	21419.1	5990.65	15228.2	8308.4	8434.35	9416.45	4736.24	18822.3	8902.8	11146.1	5906.57	9235.86	2130.35	7049.5	7248.8	7771.28	14838.1	4197.61	3991.1	3004.55	51398.8	30937.1	19588.2	2374.18	11993.6	7096.02	2955.17	21396.3	6564.07	4733.65	30506.4	25516.5	29474.7	27223.1	26822.9	23604.3
Q16629	SRSF7_HUMAN	Serine/arginine-rich splicing factor 7	SRSF7	35	35764.8	38146.6	40885.9	36448.5	25112.5	27079.3	97629.4	94863	59556.9	56653.9	43388	90940.7	111117	90704.8	70697	63126.4	92966.6	92617.1	92862.9	105992	78167.9	34126.1	93662.9	104841	110182	132056	93054.2	115767	94398.3	84745.7	78541.6	84393.7	25324.7	97417.9	103997	97688.9	88907.9	82562.8	104884	86575.9	103294	90066.1	84534	170572	66172.4
Q13263	TIF1B_HUMAN	Transcription intermediary factor 1-beta	TRIM28	97	314132	355780	264285	83013.4	164345	208851	129203	118256	127279	125055	50366.8	174320	135351	117250	90832.4	119860	130896	125667	164496	130824	159608	55679.4	164199	165373	174211	223814	138659	189166	136641	112399	63105	69789.5	93786.8	100744	187792	141752	207027	198947	169902	136450	176872	195126	158785	127126	178413
Q9UIG0	BAZ1B_HUMAN	Tyrosine-protein kinase BAZ1B	BAZ1B	74	9225.27	22621.1	8768.75	11450.2	9425.56	793.699	47481.7	36152.3	33888.5	25574.4	29141	36525	38895.9	18832.7	27669.9	25296.3	46132	53571.9	27272.1	34759.7	33848.5	152345	29616.3	35278.2	29915.8	27340.8	16481	9344.9	34034.5	14873.7	16544.6	11240.2	10911.1	22192.2	17208.1	10051.6	6644.97	11873.9	12255.4	13471.8	18393.5	46171.4	27465.5	7852.15	5461.99
Q13042	CDC16_HUMAN	Cell division cycle protein 16 homolog	CDC16	23	13575.4	9659.31	9921.52	1318.42	15695.1	11991.5	5982.79	88090.3	5366.36	34865.3	8185.59	8470.35	17021.1	32464.1	9269.05	9602.68	1623.51	3833.84	2918.16	4144.1	10787.3	1640.24	2602.17	59315.7	12047.7	3600.85	76500.7	3448.74	80360.6		2916.52	4998.57	5964.26	1872.78	1463.22	3874.09	1411.44	3577.33	1783.85	8455.77	13557.7	1934.24	2141.01	70112.3	121730
Q16513	PKN2_HUMAN	Serine/threonine-protein kinase N2	PKN2	61	8501.7	36908.4	11033.9	114017	20769.5	23833.7	26856.8	34191.9	33666.8	23666	2588.28	18123.5	15835.5	46088.3	12866.3	35158.8	33367.9	13099.1	44567.9	21899.1	64078.3	98365.2	40615.4	30579.6	28749.7	103463	22807.7	12712.4	18828.4	3041.6	4478.94	3459.45	7001.58	13513.1	16475.5	11037.8	21308.7	13867.4	36983	105079	34126.1	23409.9	60223.6	26828.1	27733
Q14258	TRI25_HUMAN	E3 ubiquitin/ISG15 ligase TRIM25	TRIM25	50	131660	153682	132353	60259.2	62221.7	52758.6	67026.5	65307.4	53777.3	52915.7	29214.2	45139.7	58562.7	58505.9	136208	30116.4	90591.4	26166.8	49300	34722.4	48251.5	41619.3	56295.7	42782.6	65333.7	103321	134159	32631.4	41821.2	20214.2	13673.2	14376.5	27208	120501	26556.6	23765.9	55999.9	48855.4	66312.4	55201.7	57026.7	51590	59666.6	72064.7	64035.6
Q5T7W7	TSTD2_HUMAN	Thiosulfate sulfurtransferase/rhodanese-like domain-containing protein 2	TSTD2	12		8895.95	12241.9		1368.54		930.096		480.714	133061			653.974	60.4779	2250.19	1877.94	3303.02		265.802	145.269	113863		1731.11	2230.34	193.264		8410.17	1243.37	225.864					315.856	576.269		1235.26	333.299	5031.41	757.588	2314.01	6612.43	610.923	1347.01
Q9Y4C4	MFHA1_HUMAN	Malignant fibrous histiocytoma-amplified sequence 1	MFHAS1	5			564.677								359.812		161.274					86.4787			267.157	691.063			1116.82								3005.94	757.564	1999.44
Q6ZRS2	SRCAP_HUMAN	Helicase SRCAP	SRCAP	55	6369.23	15891.7	7459.15	743.441	6403.61	2570.64	99309.7	51586.8	55323.1	71053.4	2531.33	57100	60589.8	18213.4	95923	7992.38	71186	68333.7	68146.7	82188.7	54372.6	8387.88	15411.2	113278	17122.1	16109.2	59642.5	22626.8	42397.9	15601.7	18471.8	2484.09	19492.5	111248	132150	58193.4	42096.3	59811.1	23131.8	25802.4	19676	16717.3	69461.5	66502.2	56392.9
Q96A37	RN166_HUMAN	E3 ubiquitin-protein ligase RNF166	RNF166	5			126.247													1594.33				5764.81	937.164				367.268	209.32		1828.48											1298.91			2877.99	9815.18	2447.23	2510.93
Q9UL36	ZN236_HUMAN	Zinc finger protein 236	ZNF236	5								100.366	268.74	687.994		116.531								2667.99			714.073	469.84			181.746		5227.87															230.022
Q9NRC6	SPTN5_HUMAN	Spectrin beta chain, non-erythrocytic 5	SPTBN5	7	33780.4	3986.53	36146.1	29694.1	28538.7	29586.2	46717.7	38306.9	30733.4	30316.4		36026.2	33743.1	29070.8	29116.8	29032.4	31792	29217.9	31557.8	29114.4	36767.8		40967.7	45182.8	41872.5	42800.9	51447.3	46997.1	51755.3		4801.11	34076.8		46271.3	49325.9	134.664	46562.8	45481.1	50255.5	55850.6	57170.2	52700.8	33725.5	33968.5	71983.8
O75140	DEPD5_HUMAN	GATOR complex protein DEPDC5	DEPDC5	22	15463.6		2227.51	511.503	22464.2	3576.55	1913.62	6532.12	16620.5	6559.72	15120.2	788.962	14174.5	14878.4	7114.35	12037.1	1197.65	2609.12	1806.67	16389.8	15806.5	1775.95	503.864	1649.49	25777.2	1677.32	2097.99		14161.3	1486.17		1271.02	2823.62	5931.62	4455.2	1073.02	1876.79				5441.49	9887.78	3216.31	6600.4	2654.4
Q8WXX5	DNJC9_HUMAN	DnaJ homolog subfamily C member 9	DNAJC9	22	21756.6	948.005	1623.74	160.2	4221.37	1956.84	17650.7	13504.4	6243.83	49261.3	3243.65	43331	7468.93	5483.36	6181.35	6636.23	7873.33	4597.85	18046.5	13360.2	8683.99		40065	9528.72	5684.42	6291.22	10738.9	19578.7	7216.89	6700.74	12201	8664.9	9633.82	14392.7	8788.34	17646.7	5142.48	8821.04	9985.16	8166.59	8050.66	6874.99	7371.39	5886.78	6178.54
Q0VDF9	HSP7E_HUMAN	Heat shock 70 kDa protein 14	HSPA14	33	30214.4	29169.3	30433	4461.44	4485.6	9454.48	7708.46	11487.7	6700.67	5965.19	10084.6	7561.37	7267.66	12683.5	25653.2	18749.7	15353.6	10027.2	10284.7	12795.8	5897.12	6721.94	16345.1	21541.5	6706.29	9234.14	5515.19	15545	10223.4	6096.99	8938.17	7482.2	5152.01	11765.8	12164.2	11461.5	21257.5	9052.71	10038.5	36318	11519.8	17241.4	9457.7	9625.62	8357.15
Q9H5Q4	TFB2M_HUMAN	Dimethyladenosine transferase 2, mitochondrial	TFB2M	26	17009.1	206.719	6783.26	7333.68		2255.68	30223.8	1818.17	18653.9	4493.3		212.242	202.763	1143.06	3932.36	6495.81	2822.09	1077.72	2264.02	1733.84	3551.16	992.736	3032.72	20554.7	3135.67	9816.64	6064.33	4561.52	6714.97	3867.57	3441.82	3844.33	999.857	6690.82	3711.43	2651.77	14411.5	13291.4	9298.78	7182.51	6126.7	7296.46	11375.4	12550.6	30580.5
Q16595	FRDA_HUMAN	Frataxin, mitochondrial	FXN	13	32725.1	33987.9	25524.3	8604.77	4653.6	3031.22	2256.97	13361.3	14362.2	2713.79		2988.52	22913.3	1316.71	1636.29	12302.5	2710.33	2168.77	2965.87	1582.4	2285.31	3544.52	14743.6	3460.78	3380.33	3441.53	1626.65	29006.3	4543.23	427.804	2045.82	92.0916		742.548	5413.94		7462.33	7258.66	5323.08	2772.07	2803.44	3772.29	1761.78	3794.04	4494.74
Q9BQ95	ECSIT_HUMAN	Evolutionarily conserved signaling intermediate in Toll pathway, mitochondrial	ECSIT	24	26564	16206.9	18468.1	101767	29605.1	28971.4	22270.1	2357.22	32601.6	18903.8		22725.3	13759.1	3054.8	3930.18	34637.1	25852	14441.8	5085.67	1631.7	1217.28	79040.1	21055.5	32127	4063.32	22944.9	11101.5	6919.23	6743.76	717.891	5189.05		88078.9	16436.4	7766.47	32585.3	10959.9	8672.1	23029.1	20200.5	9775.87	6716.27	8092.05	24447	8865.63
O75167	PHAR2_HUMAN	Phosphatase and actin regulator 2	PHACTR2	4							230.428		117.561	310.064			259.602				2360.33	166.004			204.494		435.535	367.292	239.483	167.354	129.166				140.176											133.09	511.116
Q9H707	ZN552_HUMAN	Zinc finger protein 552	ZNF552	6	313.375	144.056				807.122			317.486				1320.54	2138.05	5573.42		2486.49	3439.29	7531.81		4691.49		2167.32	3988.53	480.567	475.55	4815.54	4791.81	1122.81					1119.23		204.963	5891.06			500.565				10189.5	4190.83
P51648	AL3A2_HUMAN	Aldehyde dehydrogenase family 3 member A2	ALDH3A2	35	96251.9	88981.6	79547.1	2716.61	19086.4	126272	108368	118242	71139.6	109014	3152.3	111999	67830.4	169707	156297	159486	20884.8	23020.9	134330	205817	215381	1360.23	23359.7	31353.1	147590	130109	197944	62248.2	187648	17631.4	52761	16686.8	6263.76	33342.7	154326	205835	46580.8	46106.8	73637.4	74361.7	104750	41067.8	62296	65827.9	64651.4
Q969X6	UTP4_HUMAN	U3 small nucleolar RNA-associated protein 4 homolog	UTP4	46	54546.7	24141.1	22330.2	64414.5	4540.1	3867.71	3030.96	23397.4	6258.29	2910.53	1090.28	9797.85	12727	5774.86	5228.22	13313.1	9017.41	4096.16	9724.5	8164.37	9021.13	4681.67	11718.1	7780.88	6569.68	2694.62	6396.81	7998.47	6224.1	7664.58	23208.9	4476.19	2200.27	6161.56	7011.26	9246.88	12490.4	7415.69	32007.2	10834.1	10410.6	30780.6	5853.12	11637.9	10023.9
Q53H96	P5CR3_HUMAN	Pyrroline-5-carboxylate reductase 3	PYCR3	17	5336.24	4551.93	6552.15	7460.67	5891.44	5782.1	3720.58	109248	938.986	953.602		1566.53	3014.95	2541.59	2381.82	2210.04	2665.83	2390.32	15632.7	9858.18	2391.84	652.148	1355.06	1866.18	989.095	851.887	5174.42	11098	3950.8	2680.28	3633.75	3404.47	793.995	4739.81	4347.29	4089.64	4064.16	2742.87	4687.31	461.248	1306.65	979.463	2128.57	4314.14	763.417
Q13428	TCOF_HUMAN	Treacle protein	TCOF1	74	22916.7	38985.3	23716.8	26871.4	21385.6	50364.6	102965	108214	79420.1	83692.2	14662.2	72272.5	89238.8	95634.4	100071	88085	91944.9	62317.2	71883.8	89270.3	92854.3	23218.6	102122	126282	113464	115605	63099.3	67912.2	68158.1	60142.3	63450	63758.2	23255.2	55729.1	60212	62430.7	67965.5	69592	136534	73846.9	69050.5	70322.9	68685.2	89828.5	60729.1
Q9UKK6	NXT1_HUMAN	NTF2-related export protein 1	NXT1	5	3762.24	5204.62	7262.59	1402.63	1358.43	1372.95	1538.6	2999.63	1891.81		1061.73		2890.66		1390.78	226.212	2997.59	297.979	2105.46	3326.05	3165.16	1252.32	1937.65	1064.21	1101.62	2041.74	4147.46	2019.38	1708.45	2878.55	2680.48	5118.87	250.432	5024.03	4569.97	5174.07	4968.86	4381.88	6121.31	3973.76	1812.27	3904.18	3630.08	4347.71	4465.91
Q96K21	ANCHR_HUMAN	Abscission/NoCut checkpoint regulator	ZFYVE19	17	608.141	808.228	16191.7	810.36	796.439	2170.6	3676.7	2354.28	1059.96	19729.7		745.717	4420.83	45544.3	1005.7	2569.43	14234.7	2349.09	573.815	31302.7	1333.58	3445.34	25341.3	3677.23	2115.62	2635.6	3411.85	2186.77	3406.58	1429.87	1539.74	2039.99	417.067	1274.11	1617.91	1670.04	878.79	584.091	1194.29	2180.42	2301.71	2249.3	2748.49	1330.8	1095.46
Q8TF40	FNIP1_HUMAN	Folliculin-interacting protein 1	FNIP1	24	22230.7	623.438	1869.48	2537.57	1920.84	3296.77	79.1455	2916.72				2796.33	43971.4	41320.3	39522.2	41654.2	207.896		3411.24	1673.24	342.692	384.682	1058.07	4766.04	2148.91	2952.45	6813.26	14014.1		163.024		4538.41	3939.46	3412.77	2897.82	4390.12	520.578	1288.19		3544.74	3407	312.858	1612.64	192.048	3188.96
Q3KP66	INAVA_HUMAN	Innate immunity activator protein	INAVA	12	4222.76	695.905	5741.87	1593.43	2260.35	489.686				122.552		566.263			31225								732.991		3335.54	906.645	177.258					8549.31	1081.96					254.707	2132.2	160.64					3121.78
Q96RU2	UBP28_HUMAN	Ubiquitin carboxyl-terminal hydrolase 28	USP28	30	5406.61	2205.38	6759.19	878.627	3862.42	6610.3	3272.18	4984.07	3397.99	2484.55	1057.49	3645.29	3048.54	1574.17	8715.13	5425.45	2718.8	4365.99	5601.07	21003.6	19943.9	4099.82	5941.85	5007.44	5239.29	4881.11	501.633	6985.82	2547.95	551.744	6554.27	576.433	2242.03	370.935	851.698	1177.36	1892.9	2740.17	2284.82	6327.63	4594.2	3063.41	4732.3	4130.7	4613.79
P11908	PRPS2_HUMAN	Ribose-phosphate pyrophosphokinase 2	PRPS2	48	11616.7	11625.7	35889.6	349350	305346	299781	47084.5	30120.7	152475	17887.7	4899.78	11285.2	26229.3	56417.1	53101.5	35694.8	13640.1	19203.8	22495.3	46218.3	60785.1	1505.43	39630.3	37830.8	48963.6	37211.7	22043.4	30430.6	18091	11757.1	12143	29638.3	6310.62	176450	14582.5	23444.1	17075.2	16781.3	17724.8	20067.9	19174.5	5858.09	15078.4	18700.7	15583.3
Q9UPM8	AP4E1_HUMAN	AP-4 complex subunit epsilon-1	AP4E1	22	17419.1	15394.1	9400.28	464.414	8896.88	274.125	1190.25	767.327	2017.89	32383.7		5009.93	3705.47	164.443		657.632	6983.5		432.541	2521.81		85.2608	288.333		315.417	148.574	770.496		4980.66		223.31		111.426	13999.6		1652.83	544.689		2290.92		292.931	3642.37	2123.77	9719.25	1627.88
Q587I9	SFT2C_HUMAN	Vesicle transport protein SFT2C	SFT2D3	3	742.43	825.766	987.617			3375.01						2736.47		2132.24		2895.44	213.934		4249.68		629.243			123410	120779	126381	50487.9	50952.1	50182.1	74484.1	77531.7	77597.6		79022.4	81038.6	78561.6	129514	128694		457.248	679.796	232.698	355.072		262.113
Q6Y1H2	HACD2_HUMAN	Very-long-chain (3R)-3-hydroxyacyl-CoA dehydratase 2	HACD2	5	3295.14	4458.48	9471.02	859.084	2227.86	513.419	582.269	1838.1	1328.91	1405.68		7972.84	5215.11		6499.32		674.105	146666		639.738	974.121		204.882	403.686	253.639	1774.83				531.417	211.763	87.6621					4260.09	4100.47	2994.38	2431.3	1354.2			2407.98	1115.22
Q01151	CD83_HUMAN	CD83 antigen	CD83	6				2056.72	1503.62		1981.3	1111.23	1207.63	1579.82		2629.68	2859.4	3023.58	3360.49	8415.7	3494.23	1836.06	1645.09	4297.38	9064.41		7379.34	3183.61	6384.69	6770.43						586.692		511.398	1006.66	1707.01	1256.81	829.555		3556.82		1497.61	799.263	2823.48
Q8WW22	DNJA4_HUMAN	DnaJ homolog subfamily A member 4	DNAJA4	6		112.932		7033.48			100.547					10954.5	78.6	1647.03		9923.12			575.642	209.259											1744.85				892.528				4172.72		868.84	617.526		213.243
O60266	ADCY3_HUMAN	Adenylate cyclase type 3	ADCY3	14		75559.6	620.845		149.664	625.199	728.192	436.862	4015.87			3245.37				10769.8	1211.85				319.75			346.793	451.157	677.796	338.045	368.334	609.082	78154.9		770.872	3550.28	4471.84	190.715		2224.74	525.97				539.343
Q9P032	NDUF4_HUMAN	NADH dehydrogenase [ubiquinone] 1 alpha subcomplex assembly factor 4	NDUFAF4	21	17988.9	16506.8	23181.7	30158.5	26328.3	35231.5	5690.97	21833.4	3711.74	4164.69	768.627	19681	21671.6	2956.98	5039.66	1764.28	9365.18		950.4	1602.03	7355.93	1883.75	4238.4	15493.6	3046.41	18159.1	14777	15135	5440.21	6648	1650.56	1665.07	2160.82	6903.78	14417.4	11215.4	30483.8	11287	11800.5	10087.9	9478	8774.51	9880.8	5907.21	4202.97
Q5UCC4	EMC10_HUMAN	ER membrane protein complex subunit 10	EMC10	7	22101.4	25956.2	22704.9	10609.9	9496.33	8860.09	2478.09	15039.3	14383.9	11275.3	6509.99	3363.47	2896.69	1993.96	1809.53	1632.39	2343.51	2297.02	5166.73	582.93		3741.5	1028.04	9294.08	1630.58	2733.2				1026.91		1048.64	3418.14	1334.2		1730.77	5300.7	1929.35	5565.53	2784.9	5579.35	4451.02	4669.73	2311.75	2035.84
Q9BTZ2	DHRS4_HUMAN	Dehydrogenase/reductase SDR family member 4	DHRS4	12	8144.28	3697.74	3152.31	1551.45	118.764		9725.08	4448.43	3263.14	3980.35	291.521	2821.36	2625.9	2515.82	3156.32	2425.45	4344.08	2941.01	2091.63	3418.38	4939.73		4512.01	2879.93	3518.71	5998.7	1877.66	810.509	3338.22		187.915	227.602	2344.96	408.129	699.926	486.22	4500.97	4258.94	7238.81	2690.92	2147.73	10903.5	6160.99	6702.45	5206.34
P01130	LDLR_HUMAN	Low-density lipoprotein receptor	LDLR	42	13221.4	76581	12569.3	13550.6	6395.69	11369.2	7112.88	11340.2	8707.52	37609.5	3190.77	35667.6	28191.2	26234.7	40492.8	5127.29	2329.78	10243.5	1544.11	2965.29	5130.09	7830.25	10255.1	5288.57	2441.34	10801	24297.5	11356.5	10935.1	7223.14	44215.5	8262.89	21874.9	14215.1	13923.6	21483.3	10910.5	10352.6	7883.94	5503.97	6068.08	18736.8	4037.26	44130.9	3182.29
Q13887	KLF5_HUMAN	Krueppel-like factor 5	KLF5	12				1613.88	1165.78	993.946	50335.9	745.577						1616.33	1105.79				487.583	2248.15	1697.87	167.697	1431.81		747.882	1319.63		310.885	1880.08		376.071			421.797		1163.26	447.46	866.053	809.986	1256.35	1133.85
P46734	MP2K3_HUMAN	Dual specificity mitogen-activated protein kinase kinase 3	MAP2K3	19	12878.1	14592.2	57464.5	9532.46	54250.2	10611.9	7072.14	8196.64	6823.67	7897.28	5513.62	6192.69	10001.6	13630.9	6805.14	5664.04	4818.48	5728.31	6640.79	8838.09	19582.3	6049.25	11003.5	9217.33	9215.34	9075.17	8145.97	9277.84	8969.34	4446.07	7100.6	6390.7	4559.46	7953.13	6277.32	8153.85	12099.3	13445.7	14280.2	13215	13380.3	11859.5	9633.92	11166.5	8419.71
Q14442	PIGH_HUMAN	Phosphatidylinositol N-acetylglucosaminyltransferase subunit H	PIGH	6	523.993		462.929		281.253	1090.37		2698.27	347.713	2582.48		6515.42		4809.8											640.814						285.526						1266.79					250.417	407.344	431.289	266.249
Q9H9Y4	GPN2_HUMAN	GPN-loop GTPase 2	GPN2	6	6210.06	6133.5	6946.26	226.664			383.48						217.655					221.178				2350.98				60.6739							568.173				655.486	1263.71	887.333	1345.34	538.821		2761.43
Q06323	PSME1_HUMAN	Proteasome activator complex subunit 1	PSME1	42	37552.2	12284.8	43325.3	265697	281364	39049.7	8867.55	145335	68837.9	18848.7	49863.6	49571	22432.2	12950.4	25309.9	9448.1	44833	7811.33	86567.2	40094.9	61245.4	12719	52141.9	11207.6	94770	9128.08	26889	30230.4	29050.9	1866.11	7420.27	9717.1	35469.7	32280.5	81921.6	47315.5	23589.3	22804.6	21860.8	42198.7	42414.6	247466	17930.8	23207.5	100363
P46013	KI67_HUMAN	Proliferation marker protein Ki-67	MKI67	240	142553	98023.4	176529	169786	115946	809776	267506	299882	270884	211196	29269.8	340155	217299	194614	215937	189448	187586	203236	249791	738395	766478	35324.8	264571	343925	309110	323630	268983	61807.3	88651	22717.4	23875.4	182932	36867.2	39627.1	86663.8	346254	77121.7	114008	89055.9	66728.9	99398.5	107470	252355	291469	89163.2
P04626	ERBB2_HUMAN	Receptor tyrosine-protein kinase erbB-2	ERBB2	38	3695.12	6248.03	2932.84	1929.91	11809.2	29999.1	11571.9	34189.8	4068.69	4720.36	2172.18	34154.9	20382.5	5744.96	2831.44	1236.14	19139.2	6735.9	4563.72	5356.87	4275.53	2026.96	11223.3	2554.67	3027.27	3256.77	1968.77	2501.4	1883.43	1819.92	158.773		4271.8	1766.54	2533.1	620.28	2717.52	2650.04	24127.5	2272.95	1908.93	3793.95	3605.15	2305.3	3448.06
Q9NXK8	FXL12_HUMAN	F-box/LRR-repeat protein 12	FBXL12	10	5416.18	1165.83	2738.38	459.151			3005.53		815.01	381.13	146603			842.449		551.803			507.665				6057.01	8099.36			4006.45										17958.8	18391.1	279.873		563.11			3074.65	1528.34
Q9H2P0	ADNP_HUMAN	Activity-dependent neuroprotector homeobox protein	ADNP	62	14610.1	55059	9955.67	7658.81	12673	1865.35	44791.8	33254.7	24515.3	29278.9	76295.7	33437.2	75355.2	40440.2	21679.3	14364.2	21948.2	28384.3	29732.8	28566	34631.7	4531.93	34439.9	50466.3	48678.3	52178.6	21508.5	33647.9	35314.7	41616.6	26411	20430.7	8600.1	25102.1	33160.5	31317.7	54802.7	29821.5	42042.6	20578.3	45469.3	29278.4	30236.7	34335	27475
Q8NEV8	EXPH5_HUMAN	Exophilin-5	EXPH5	29	180390	1119.84	262.193	213063	196896	980.077	3460.27	1140.49	928.802	2357.89	161200	214.572	7037.34	1218.5	5464.65	3728.81	1155.62	756.675	5004.57	1073.24	5388.6	158903	80139.9	6740.28	29085.3	1336.09	4581.96	5697.34	502.063		214.474	220.815		1257.36	162.287	739.949					1223.3		37139.8	46051.9	1159.8
Q15545	TAF7_HUMAN	Transcription initiation factor TFIID subunit 7	TAF7	12	1254.37	1517.1	1911.78	1236.69	7431.73	6640.22	14320.9	2835.11	482.177	2314.5		2165.07					791.849	3806.75	418.226	1735.6	16182.9		818.325	912.035	1247.36	1618.75	243.629		6808.49	569.686	569.422	914.93		558.669	3763.18	502.043	1157.63	1107.5	476.792	638.177	574.972	2529.88	1224.18	3307.47	1786.37
Q8N5M4	TTC9C_HUMAN	Tetratricopeptide repeat protein 9C	TTC9C	14	6233.63	8133.96	8679.8	12675.6	2217.55		534.809	2035.7	1475.05	1228.15	16528.4	7036.3	780.296	4106.55	3146.21	400.525	986.254	435.133	15579.5	530.359	934.632		20289.4	595.052	24116	25564.9	196.907	351.299	12814	1996.81	413.626	1210.85			11660.2	153.715	425.62	201.634	850.246	9091		435.749	109.584	159.619	10389.8
Q02487	DSC2_HUMAN	Desmocollin-2	DSC2	11	4689.97	4966.45	6831.99	2313.86	2725.54	15365.9	17825.3	20446.3	21643.5	16510.7	2491.27	7217.21	8107.72	8582.74	8114.18	8628.37	11643.2	18502.8	5680.31	4174.1	4118.15	5077.83	3806.09	5097.15	5162.87	5370.29	5120.39	7299.16	5844.8	7395.55	8829.51	5575.87	6269.02	5367.14	5054.37	4445.98	10123.7	4761.65	12467.2	13348.9	13388.3	12667.9	9838.37	9389.14	10748.2
Q5W0B1	OBI1_HUMAN	ORC ubiquitin ligase 1	OBI1	15	539.005	337.443	1306.34	2634.59			1826.07	3856.09		1772.8		1712.28	620.99	217.669	45.4146		361.868	1938.45	1234.38	1699.57		731.51	878.742			2526.68		119.192			2892.85			5115		7292.76	2642.29			125.182		1605.67	2943.66		297.204
O75962	TRIO_HUMAN	Triple functional domain protein	TRIO	80	197270	7855.68	6202.3	848.784	5889.2	649.064	10387.7	23903.1	18915.7	4471.31	5404.24	7351.3	16089	15898	2483.95	18034.8	8590.27	13882.6	7087.39	4445.88	3768.44	9822.9	17887.7	19917.2	12482.4	14232.6	6425.4	12219.3	5187.61	6147.27	6181.54	11038.2		13739.6	2773	16846	16526.5	15439.5	31279.8	18918.8	45948.3	34245.8	22382	27726	24534.9
A6NF01	P121B_HUMAN	Putative nuclear envelope pore membrane protein POM 121B	POM121B	10							1730.2				363.881	990.913			380.901		81.6467	189.5	151.303	808.075	260.912	2260.71	593.679	537.108	290.416	504.404				3178.13	3818.32		424.19	2421.78		1286.02					1480.62
Q6PL24	TMED8_HUMAN	Protein TMED8	TMED8	10	4269.07	1767.24	17539.1	6761.84	976.86	2198.29	742.317	1898.12	6791.92	2823.14		2019.82	2184.55	1808.16	162216	1830.97	1400.57	1457.94	1377.7	13009.1	1342.67	1136.83	2291.57	1451.62	1555.16	1522.48	5056.55	1907.34	1800.96		685.194			9450.84	625.107	1527.5	2280.58	2463.36	3099.34	1463.28	2496.99	5846.32	1694.37	2689.47	2160.53
P12956	XRCC6_HUMAN	X-ray repair cross-complementing protein 6	XRCC6	110	207741	163270	165215	43836.8	62739.7	79850.4	125769	409493	339834	313578	29751.9	319246	333206	310023	76541	111223	299952	301955	321453	106883	423288	42810.8	172140	144598	124685	131727	297140	232466	97806.8	109756	120484	125277	36510.9	94799.9	189410	184392	61883.1	84772.8	69663.9	76759.9	56237.1	56629.8	65746.6	62948.7	65622.1
Q96J92	WNK4_HUMAN	Serine/threonine-protein kinase WNK4	WNK4	6	795.404	811.185	691.806		341.826		3445.87	2066.99	1740.2	2374.92		14654.4	13822.6	28282.3	3255.2	4562.9	3011.62	1479.43	11161.5	2496.38	477.403	81.5738			1573.28	1598.33			332.966			358.292		334.259		1265.94		946.973
Q6N043	Z280D_HUMAN	Zinc finger protein 280D	ZNF280D	11		94504.5				692.18	287.035		571.824	14647.1	1298.91		135.973				552.879	868.167					6864.43			595.507	292.316	6323.68				3088.82		218.576		1715.14				536.921		20334.4	127.782	292.964
Q9BZE4	NOG1_HUMAN	Nucleolar GTP-binding protein 1	GTPBP4	56	75321	61178.6	88701.8	61714.9	42964.8	48085.8	42528	47085.7	40441.3	37785.9	15993	34795.5	24611.2	30451.8	22610.3	23607.7	53381.5	41160.9	49443.8	59555.9	43113.4	2820.98	54327	69144.2	65942.1	64864.1	33940	35028.6	37044.2	20763	19127.8	83202.2		49163.8	31520.6	31913.4	57699.3	70356.1	105316	59515.1	47550.9	41115.7	43645.8	40600.8	74994.8
Q8WYB5	KAT6B_HUMAN	Histone acetyltransferase KAT6B	KAT6B	24	3487.24	74.9772	2051.55		2662.39	1613.48	1407.14	4142.41	1952.34	8980.75	10595.9	8255.19	8751.41	62.3317	3086.77	71803.1	3281.41	1156.32	1399.48	13209.9	1781.06	310.608	10291.6	3543.32	2205.16	4095.13	1685.91	1150.15	1349.28	868.206	688.531	1213.51		4187.66	446.816	2911.08	2895.32	1606.09	11545.3	2903.23	693.17	2427.64	2144.88	952.301	9351.22
Q3T906	GNPTA_HUMAN	N-acetylglucosamine-1-phosphotransferase subunits alpha/beta	GNPTAB	14	1186.06	559.855	1352.66	2167.74	169.105		233.724						4127.14	97.4894	4895.36			5439.91				1241.6		227.983				335.164							394.465			32044	2406.48	1258.23	229.423		20023.4	868.892
P05121	PAI1_HUMAN	Plasminogen activator inhibitor 1	SERPINE1	2	318.919			600.156																							1279.52	710.979	705.143	648.871		527.618					2057.66	866.99	1715.51	3902.73	1490.34	1067.18	1304.66	938.3
Q15836	VAMP3_HUMAN	Vesicle-associated membrane protein 3	VAMP3	18	95745.2	93975	84898	67526.2	67990.5	69620.1	37510.2	24862.5	29372.6	28694.2	41968.6	20421.2	22410.9	13070	10700.2	12415.3	31432.2	27382.9	47015.6	24405.8	39079.3	58583.7	54425.4	36696.6	36091.8	34296	24893.2	23367.1	33775.1	21462.8	20379.6	21213.6	43316.4	25306.6	32776.1	26776.3	32768.9	31922.6	20328.2	28226.9	23646.8	32950	19363.2	30149.2	17455.4
O15144	ARPC2_HUMAN	Actin-related protein 2/3 complex subunit 2	ARPC2	29	21579	13212.3	16550.8	4765.75	3186.7	10740.7	11793.4	16603.3	7520.02	9458.55	5024.9	9617.19	10153.1	12830.7	9495.4	11874.5	6908.38	8016.75	10589.1	11092.1	10293.2	7930.93	9746.08	12377.2	9235.54	9502.11	16363.1	10929.9	13150.9	27041	6852.67	8981.48	9383.85	10721.7	15961.8	15758.9	8619.64	9413.97	30099.2	11894.5	9698.26	8436.18	39851.2	9092.04	8074.28
Q8WV74	NUDT8_HUMAN	Nucleoside diphosphate-linked moiety X motif 8	NUDT8	9	269.142			3409.94			664.759	962.632	649.222	276.52		490.09	807.925						135.169	121.7					784.522	1183.53							50221.8			470.173					441.952		152.429
P61923	COPZ1_HUMAN	Coatomer subunit zeta-1	COPZ1	16	21505.2	26058.7	14369.1	4575.72	14402.6	14463	32295.3	2269.32	7127.96	21347.7	2277.14	19840.7	8253.2	24584.1	31810.7	26276.7	21623.2	27346.9	24066.5	25473.9	37984	1560.72	31737.3	14957.5	12275.5	12298.1	14549.8	14003.3	4623.14	4362.44	7986.12	4547.64	3065.2	8875.83	23874.4	7919.49	28926.7	36667.9	24795.4	14134.3	29001.4	9471.66	46227.4	22309.9	21312.9
Q12996	CSTF3_HUMAN	Cleavage stimulation factor subunit 3	CSTF3	37	18808.6	20456.3	19593.7	30409.9	29651.9	23362.4	16304.6	18906.1	18078.5	19883.2	19652	42890.7	22420.3	18054.3	13368.3	15723.2	16995.8	8180.21	11354.5	13341.4	18033.4	1444.33	20741.6	15380.3	17108.2	20680.4	25346.7	57790.3	23755	25675.1	21140.5	22056.9	7904.97	24623.8	25526.5	27056.5	21414.6	20150.4	20165.9	10377.3	13208.7	13820.3	12864.1	13192.2	12858.4
Q4W5G0	TIGD2_HUMAN	Tigger transposable element-derived protein 2	TIGD2	9	2034.15					2182.34	1580.56	382.757	341.496	84.5788		102.796	352.041		63.4472	376.058	123.349	148.297	149.331		553.393	1349.15	263.834	656.719	464.153	501.067		83.6287			255.498			5067			260.481	603.717	5382.24	998.445	485.271	1090.62		299.204	6160.39
P82930	RT34_HUMAN	28S ribosomal protein S34, mitochondrial	MRPS34	14	3385.72	3621.3	4380.37	2780.93	2792.92	2876.14	4423.46	3916.54	3437.77	3502.55		2473.44	4729.52	2548.97	1282.46	3773.07	1735.72	619.5	4013.09	573.735	10190.1		1544.72	5430.71	2111.34	6345.1	2691.21	2437.23	4518.29		438.468			582.987	876.49	3448.92	2610.99	2323.84	3468.2	3684.97	3847.32	3341.64	2205.73	1940.88	2352.69
Q01995	TAGL_HUMAN	Transgelin	TAGLN	2									887.646			1535.69		1943.68				1319.58		2136.24	2256.63		1261.49											1699.57
Q15772	SPEG_HUMAN	Striated muscle preferentially expressed protein kinase	SPEG	6					48627.6	1359.04					151.014		163.61					16583.6	309.133	13389.5															1735.92		238.946								11141.3
Q05639	EF1A2_HUMAN	Elongation factor 1-alpha 2	EEF1A2	97	759807	920217	719131	546055	655326	589046	688263	643554	683141	770153	571312	740514	864414	735024	801116	665155	938162	401077	781004	625119	736033	289656	545128	633268	721084	283988	609204	733857	649133	307753	511581	489689	286278	697626	599448	608873	527450	612727	539766	553973	553355	561471	643423	606388	601469
Q9NQH7	XPP3_HUMAN	Xaa-Pro aminopeptidase 3	XPNPEP3	18	19597.6	18665.7	19029	870.817	14245.6	5000.04	1859.04	48404.6	25337.7	2195.55		2784.35	1370.83	5049.94	3267.32	1534.06	2099.04	2193.97	1012.21	674.56	17542.2	25655.3	4251.75	1193.71	78.4176		492.109	9697.49		300.915	1585.69	1762.11	2184.61	3620.44	2342.87	2500.53	4400.41	4597.54	6329.3	6549.62	5264.15	9229.04	3893.44	3460.57	4273.53
Q9UER7	DAXX_HUMAN	Death domain-associated protein 6	DAXX	20	3823.33	1078.98	946.558	314.92				69374.9	7518.9	5799.98	383.306	130.043	3024.95	8749.22	2797.53	93.1346	489.603	6064.65		253.639	2010.32		567.561	356.624	525.774	847.995	71806.9		1432.88	1362.26	281.522	323.709		309.758	2607.2	615.65	2328.58	1154.71		974.031	513.696	221.213	668.004		2453.64
Q6PIW4	FIGL1_HUMAN	Fidgetin-like protein 1	FIGNL1	17	642.366	1122.51			3135.16	1522.23	204.459	1735.3	3089.72	1205.14		1426.85	627.008	766.887	1014.53	1426.41		3531.42	3670.58	4099.97	1397.26	7617.76	1135.23	838.496	7450.61	511.071		2300.56						3719.44	12872.2	3362.47	1429.69	1636.46	457.41		6520.29		165.082	1108.37
I6L899	GOG8R_HUMAN	Golgin subfamily A member 8R	GOLGA8R	3							1333.93					179.813		335.553	701.703	628.833		575.654		281.197			538.458						170.258														5683.48
Q9BT22	ALG1_HUMAN	Chitobiosyldiphosphodolichol beta-mannosyltransferase	ALG1	13	4599.56	4731.43	8955.04	4819.32	9808.31	5157.66	5354.73	5464.22	2302.98	1626.57	971.546	2179.96	3633.94	2856.65	4846.51	4786.77		2193.11	326.51	4346.57	1206.06	535.751	2013.2	7995.39	6095.63	6810.31	2517.57	3805.92	4221.31	6683.2	1345.8	7183.38	1391.11	2701.86	3178.72	4620.33	8269.56	4226.48	2881.03	7730.03	7257.44	5168.5	8580.59	8439.69	2326.37
O43422	P52K_HUMAN	52 kDa repressor of the inhibitor of the protein kinase	THAP12	25	9845.16	9052.81	7156.94	26883.1	83040.9	99101		2236.5	2085.98	30506.8	444.439	182.476	29253	25145.5	569.091	48988.9	445.561	2412.37		881.021	3084.28	171.71	1699.34	1080.08	1086.22	52813.4	4370.3	602.912	4951.25	4397.49	229.798		1557.09	2023.5	535.392	2047.05	1537.85	729.87	853.301	7944.01	612.088		7008.16	1082.23	632.682
O95372	LYPA2_HUMAN	Acyl-protein thioesterase 2	LYPLA2	21	128416	53692.8	106224	34927.8	28213.5	21867.7	20092.5	26722.3	24740	7279.29	31466.7	14809.2	21557.1	27094.8	17660.9	26718.8	3346.36	4434.85	5769.3	4488.22	10066.9	22945	15860.1	22601.5	20976.4	6916.24	16152.2	8306.51	8373.77	6830.28	5114.36	4922.06	13050.4	6071.54	7481	16024	23079.3	9116.89	5879.3	6182.19	11076.1	16542.8	13948	6516.98	5688.96
O00410	IPO5_HUMAN	Importin-5	IPO5	134	189724	232156	184638	106013	167183	187454	145184	264087	251716	148813	35725.3	229644	222357	128629	217540	199212	204840	298143	191611	101588	233968	63472.4	346542	313919	208768	225976	212872	110521	115602	38745.3	60024.7	52904.3	129036	74430.6	99837.8	65922.6	110317	100383	66283.9	102910	49220.8	328141	108927	106029	102940
Q96S59	RANB9_HUMAN	Ran-binding protein 9	RANBP9	21	5220.94	11204.6	8892.88	1823.25	19014.3	2564.54	74311.2	11105.4	5783.32	6505.63	10928.6	2700.98	4369.72	15284.9	48797.8	4181.99	9809.46	4520.43	7884.07	8221.71	32354	2823.79	8343.22	12612.6	5721.95	12481.9	7324.58	5009.07	10118.3	8035.17	16032.2	5727.2	3381.87	18329.4	3601.86	5186.78	3986.7	5331.33	10746	3165.88	23761.7	3947.44	4437.09	8021.35	20103.5
P61225	RAP2B_HUMAN	Ras-related protein Rap-2b	RAP2B	18	12241.4	15164.8	15696.3	5506.56	1911.43	1330.64	21482.4	4423.02	15607.3	4038.51		4624.37	16577.8	10534.9	18722.4	113657	4636.85	4348.09	8773.43	4087.32	8208.9	856.175	4053.35	4233.52	5746.72	4550.56	4131.61	4045.83	3001.52	13184.8	2337.45	1440.9	9328.38	1797.42	6645.5	3734.08	23662.2	6624.16	5296.87	5413.23	4575.6	5708.42	6419.95	7080.83	5544.91
P56199	ITA1_HUMAN	Integrin alpha-1	ITGA1	32	10292.5	1820.9	1521.3	398.669	722.291	1122.03	26602.1	12777.7	14720.1	45754.5	288.1	13830.3	15905.9	13362	11651.9	14320.4	7254.13	11363.6	6235.08	13923.6	16102.6	3048.44	74858.9	11246.3	31680.4	89929.2	8478.12	6580.21	8954.14	4094.1	8664.23	9112.17	2488.56	9713.85	7983.93	5797.96	20714.2	11181.5	7925.69	13406.2	6948.6	32375.5	6139.1	7889.31	7964.07
Q9NRC1	ST7_HUMAN	Suppressor of tumorigenicity 7 protein	ST7	15	1981.65	2300.8		110.807				858.088	173.216	1408.19				27263.7	186.783	28579.1	175.668	1276.52	1654.91	2624.21	355.63		1213.92	3592.67		398.322	32845.6		1978.44	118.525		1627.29		3748.59	242.265	7130.94	16469.3	15109.5	1003.51	29342.2			304.926
Q7RTN6	STRAA_HUMAN	STE20-related kinase adapter protein alpha	STRADA	8	3587.64	446.691	8265	496.051						554.747		895.052		899.551		982.646			441.611	2273.75							85.2066			1662.85				1138.13						283.568	524.142	189.611	494.586
P16383	GCFC2_HUMAN	GC-rich sequence DNA-binding factor 2	GCFC2	24	1847.27	805.259	672.236	691.603	8124.58	1112.41	1450.24	3314.2	3593.98	1817.52	10565.6	1491.11	1117.09			540.543	616.825	2816.13	1079.26	194.188	168.426	3829.87	1923.98	4046.86	238.154			826.517	586.358		84832.8	77666				234.484		5651.47	5766.69	148135	4349.27		2102.35		9282.93
Q8TCU4	ALMS1_HUMAN	Alstrom syndrome protein 1	ALMS1	76	11654	42598.8	69197	25194.4	357.231	3880.13	149955	75193.2	45386	65971.8	35279.8	55041.8	66622.2	150454	41251.1	28616.6	25753.4	30451.2	19834.7	38150	71271.2	1423.37	49083.8	10164	36959.2	117525	10379.5	44475.5	31971.5	1233.46	10250.2	9854.14	25162	30370.3	26954.3	68861.6	76458.8	29047.4	48744.1	36895.2	108533	10673.9	111985	35041.3	37874
O75940	SPF30_HUMAN	Survival of motor neuron-related-splicing factor 30	SMNDC1	16	2728.4	882.596		412.054			724.273	14518	15298	18181.3	5018.35	11839.2	25722.6	21081.7	15714.1	21309.6	11841.8	4178.86	6638.69	4878.54	6256.11	397.086	19746	3044.55	5439.08	5332.4	8892.44	1375.1	1809.59	1330.94	1965.75	538.637	7954.14	3043.47	2400.23	1112.55	4878.73	3380.51	2867.61	3549.86	3540.99	2298.6	1552.78	3404.62	4714.82
P00403	COX2_HUMAN	Cytochrome c oxidase subunit 2	MT-CO2	24	147965	164557	169180	16772.7	22795.6	19240.6	7766.66	11254.5	15189.3	19171.3	25379.3	19362.5	10301.8	37141.3	27764.5	19428.3	18505.9	29693.1	10796.8	44994.9	44551.5	8634.62	42565.4	21424.6	24860.4	21315	15035.2	16400.2	16157.8	7243.57	6985.44	8796.02	25063.6	11869.8	11122	46141.2	27027.1	24207	31372.3	26383.9	29756.8	29891.5	24632.9	26202	20637.3
Q8NFU5	IPMK_HUMAN	Inositol polyphosphate multikinase	IPMK	6		231.448	860.074					721.046	7451.76		233.278					3176.93							3163.13			738.596									46.3424			341.101	323.191					181.771	7139.38
P51649	SSDH_HUMAN	Succinate-semialdehyde dehydrogenase, mitochondrial	ALDH5A1	28	26252.5	27796.1	23182.7	40049.1	21237.3	20115.9	32664.2	30309.8	27034.6	27428.3	3928.59	25011.7	26564.2	16380.3	25603.7	17491.6	20038.3	18397.6	32063.5	22259.7	23565.3	5619.19	26086.8	25531	23243.2	20227.4	10256.1	12078.6	8632.91	3760.76	3108.38	3646.33	4543.43	6821.1	6453.47	7029.72	12106.1	12995.9	10999.2	13648.5	14944.9	15501.9	10151.8	12253.7	17450.5
P15336	ATF2_HUMAN	Cyclic AMP-dependent transcription factor ATF-2	ATF2	10		1027.87		2786.37			1392.72	879.668	268.537	1348.13		911.409	1362.98	31031.1	1147.17	707.422	72.3288	24231.7	373.423	52.344			559.363	1629.68			1836.28	3765.39	979.407							3817.68					1701.91	1843.88	1173.32		1176.6
Q3MIP1	IPIL2_HUMAN	Inositol 1,4,5-trisphosphate receptor-interacting protein-like 2	ITPRIPL2	13	612.12	17169.8	13512	263.382	7153.46	1075.11	13889.8	9208.96	13236.7	12721.6	207.809		15992.7		769.028	5250.65		9042.46	18766.8	11085.8	5733.05	985.216	1867.74	5262.14	13204	900.936	2590.42	5343.33				357.488	777.55	28950.3		716.929	928.932	4141.91	5824.05	685.771	570.427	2353.13	3522.43	1729.68	17796.3
Q8N5I2	ARRD1_HUMAN	Arrestin domain-containing protein 1	ARRDC1	8	220.972	594.242	978.973			297.665	15074.5	12471		10034.5	887.239	9597.71	10165.1	345.481	644.354	253.061	11466.1	7709.4		346.683	313.625	601.979		1199.67			377.418	418.637	345.465	1586.65	941.761	952.16		1259.44		1075.39	1901.58	2584.22	2173.57	2023.11	1940.81	1898.27	2290.72	778.677	734.39
P53004	BIEA_HUMAN	Biliverdin reductase A	BLVRA	24	36680.2	76178.8	35444.3	15110.5	37845.6	36502	20432.7	29368.8	24435.6	22770.4	55091	15339.8	18494.3	29297.6	23108.2	28383.5	11267.1	22735.3	22695.7	23930.9	24849.3	21771.7	22951.4	15295.9	15065.2	16369	22309.4	20615	19985.6	11110.9	17344.5	14774.9	58036.6	30045.4	33518.1	26000.4	11216.3	10294.6	14553.1	8184.72	9091.91	15137.2	10627.7	14916.7	9333.95
Q6P1X5	TAF2_HUMAN	Transcription initiation factor TFIID subunit 2	TAF2	43	439.85	699.42	4555.65	7509.41	1665.18	7273.3	1440.6	1240.24	12163.3	5403.81	9898.69	1840.38	717.6	25401.7	1603.24	6653.36	13057	2294.71	2237.8	1937.33	2603.44	7670.97	19495.4	98312.7	96304.8	58298.8	8567.75	766.711	38721.7	669.148	1799.42	2458.69	15788.8	3375.75	3319.11	35239.6	4843.22	2588.95	1838.63	7680.68	4821.04	3744.95	5047.67	8259.34	5456.57
Q7RTS9	DYM_HUMAN	Dymeclin	DYM	13	2179.77	6617.01	158759	4403.73	758.897		1370.18	25355.6				389.401	213.886	166.024		204.186	1948.99	639.556	343.301		19800	11468.1		251.433		125.386	524.967		827.62	714.535		351.031	4933.88		485.382	122857	581.733	209.787	145568	27980.9		2885.43	3571.94	3858.12	93956.9
Q6KB66	K2C80_HUMAN	Keratin, type II cytoskeletal 80	KRT80	36	57679.5	44259.2	59443.7	48666.3	23027	32504.7	10314.6	4198.55	3886.42	4143.22	246155	89462.6	76606.6	3700.03	2846.23	2536.15	4796.84	5680.4	87155.5	20845.3	15546.4	87057.7	4299.61	28949.3	25584.2	4842.75	34035.2	3278.25	13993.5	2421.61	10467	9655.1	84509.8	11332.2	15311.8	11301.7	10155.9	82243.1	30465.4	21708.8	15036.4	12591.9	14235.7	15864.9	16048.9
Q5T6F2	UBAP2_HUMAN	Ubiquitin-associated protein 2	UBAP2	32	26142.8	8365	10848.9	7251.59	8766.89	7475.83	25035.5	10975.3	17846	11382.8	15052.9	16252.5	19521.7	9059.75	13565.6	10175.9	12563.1	13410.8	10395.4	11901.1	12703	17833.9	16827.7	12728.2	10231.3	15967.9	11836.3	10129.2	9445.97	7170.24	9199.62	20617.4	17064.8	7995.74	9326.1	8579.2	25188.2	4951.82	6564.87	5646.92	7085.05	7699.01	6070.78	6253.15	6421
Q8TB40	ABHD4_HUMAN	(Lyso)-N-acylphosphatidylethanolamine lipase	ABHD4	11		506.661	1980.29	735.498			1895.51				619.089		437.394		1642.25	13183.4	1359.32		2271.53	24415.1	7680.91	139138	10428.5	2709.6	17162.6	3950.45	374.528	610.261	203.003	722.947	2866.02		776.784		142.877	465.779	532.29		1429.44	1125.79	3017.51		1306.76	1330.27	89.7665
Q9BWQ6	YIPF2_HUMAN	Protein YIPF2	YIPF2	4							393.823					577.75			421.197		336.688				394.085		283.93		84.299	3245.15	695.941	577.056						268.713	426.4				247.253				326.994	571.724	86.7575
Q96G03	PGM2_HUMAN	Phosphoglucomutase-2	PGM2	48	2119.85	2346.75	2164.42	2379.61	9733.4	5776.68	28746.3	32332.9	14960.4	36649.5	21599.7	14676.1	31797.5	22961.3	30028.5	48668.7	9101.78	20692.4	11667.8	17869.2	12054.6	30922.3	16718.9	25211.6	18982.1	18147.4	36954.9	18650.8	22296.7	23742.6	27665.3	16888.9	28223.2	24434.6	27728.3	21509.6	15809.8	9391.59	9249.96	11395.8	4708.99	4176.81	7270.04	7823.83	7800.07
Q9UKV3	ACINU_HUMAN	Apoptotic chromatin condensation inducer in the nucleus	ACIN1	70	21649.5	28363.1	22138.9	14063.5	33866.1	16971.6	76111.9	51219.6	53913	42362.9	19047.9	38429.6	57232.3	58707.4	46467	68873.5	49243.4	47649.2	44025.4	36774	67990.8	26007.7	59847.6	61331.6	71358.8	58239.8	86337	80083.9	59687.9	59767.3	89997.2	63735.2	28669	56077.7	107812	104958	171675	171315	86001.7	79470.7	79077.8	92278.9	73621.6	86317.4	68524.4
P78559	MAP1A_HUMAN	Microtubule-associated protein 1A	MAP1A	5								1328.08	7577.96					504.492			42.694	1465.51						880.345					215.458		135.077			954.473					1494.1
Q9Y584	TIM22_HUMAN	Mitochondrial import inner membrane translocase subunit Tim22	TIMM22	5		616.813	2988.89			2119.99											871.782	1462.85			1316.31				1655.9		520.546									561.311	6164.13	7329.68	4471.18	3380.27	3598.17	3553.42	6162.48	2803.39	3830.87
P34896	GLYC_HUMAN	Serine hydroxymethyltransferase, cytosolic	SHMT1	40	1764.17	6696.3	3850.91	4138.03	1969.34	1213.93	31411.9	35827	28637.4	31861.8	2190.72	30964.3	26740.6	63839.4	35972.2	55155	40273.6	39362.9	50704.1	34454.5	40314.1	6194.53	36821.3	27579.2	31547.8	45018.6	28036.2	26235.7	20675.6	28570.5	27406.3	55406	6658.01	27866.8	30256.7	36244.5	38973.9	38572.4	37035.7	23495.7	24834	25188.4	32037.8	33503.4	32104.5
Q9ULV3	CIZ1_HUMAN	Cip1-interacting zinc finger protein	CIZ1	18					13429.3		9237.09	8343.27	7009.19	3898.27		5777.83	5852.64	7810.49	8789.15	4687.15	7986.02	28484.1	3587.31	4121.4	6693.83	10991.5	9055.29	10396.7	9886.55	10362.8	14934.6	4340.9	15183	1904.92	2027.42	1438.97		21421.2	18059.1	17679.7	9470.16	24493	7085.21	5276.7	5520.95	6195.79	3902.13	6481.49	2787.26
Q99962	SH3G2_HUMAN	Endophilin-A1	SH3GL2	18	4171.77	19263.8	3121.46	7880.65		402.917	9701.03	7992.48	4772.98	15996.3	2039.89	7179.62	6452.06	7660.78	9133.11	8406.53	7384.18	8381.67	7957.22	8558.52	12198.8		10508.4	13638.9	11276.2	12863.4	12562.4	25578.2	58573.5	258.096	6336.45	2478.59	1201.6	8164.8	10070.9	9057.53	7927.75	9335.93	9763.48	5692.32	6630.15	6196.7	9069.28	5296.07	8617.66
O95147	DUS14_HUMAN	Dual specificity protein phosphatase 14	DUSP14	7	36445	1584						41594.2	21627.5	31723		85.7116	9815.26	1682.06						964.136								13627.5								1637.94								544.126	67.3607
Q9Y3D3	RT16_HUMAN	28S ribosomal protein S16, mitochondrial	MRPS16	8	1482.47	3470.97	2640.95			1002.76	623.116		418.378	345.219	2573.67		473.349	1688.76	297.231	321.936	185.423	414.142	2089.18	1428.96		497.673	1234.76	3301.49	1001.35		1175.49	5932.07	802.86	2626.17	4833.63	5878.09	2558.73	2212.9	2583.86	4374.64	1791.86	1548.77	1087.13	1562.37	2849.18	2533.48	1523.06	2129.5	2736.69
Q9UL25	RAB21_HUMAN	Ras-related protein Rab-21	RAB21	21	50727.9	56769.7	42336.5	94580.4	88700.1	105137	63455.4	55077.1	37329.2	45241	95886	34693.4	31900.4	37746.3	58816.2	34215.8	36876.3	51025.9	39503.3	26536.6	41025.6	105056	28894.5	37957	49431.2	52991.5	52286.2	36338.3	43197.2	79047.8	83685.1	84274.4	101395	61527.7	65746.3	66583.1	68551.5	73076.5	72845.9	89277.2	93049.8	82130.1	67311.7	72702.2	70513.2
Q9BYN8	RT26_HUMAN	28S ribosomal protein S26, mitochondrial	MRPS26	20	14818	13938.2	10287.2	6884.06	16580.1	8643.43	5496.3	7317.74	9794.57	5275.79	8887.3	7139.28	7393.73	4387.31	5350.17	228225	5232.85	4689.46	4630.98	3979.17	2226.63		7271.64	4176.07	7587.2	262109	2875.45	203311	4804.91	376.351	3138.06	2065.97		2446.53	78338.9	2588.92	176901	7433.26	12835.4	13079.2	16702.9	16341.1	15942.6	15050.1	14304.9
Q99640	PMYT1_HUMAN	Membrane-associated tyrosine- and threonine-specific cdc2-inhibitory kinase	PKMYT1	11			2623.78		1313.92									813.945		1165.08	4665.64	748.724			147.932		3529.66			227.038	1689.91	5791.18									3059.03			1412.19	847.664	1414.94
Q8NBJ4	GOLM1_HUMAN	Golgi membrane protein 1	GOLM1	20	14767.1	16133.4	17425.2	6014.91	15272.5	9505.14	2475.85	32681	1646.36	2261.99		35420.3	3450.15	16922.8	4270.4	3183.51	3788.19	1801.33	18776.5	11501.8	3942.92	39324.4	2864.97	21343.2	23078.1	25792.5	3399.28	13157	16087.4	4371.77	1738.6	1372.89	11030.1	15076.9	1086.17	14578.2	21632.1	51765.9	27162.2	25001.1	19261.2	20112.8	17277.9	16020.5	17807.6
Q6V9R5	ZN562_HUMAN	Zinc finger protein 562	ZNF562	7	1113.63	20089.4	1668.92		6386.16			66719.6		42958	463.781	38804.2	1468.21		40556	41196.7		37110.4	36132.5	2978.43	286.891		54394.1	719.105		1643.72	92917.9	1316.63					5535.95	1438.77								28038.8	28615	31183.5	30300.5
Q96N96	SPT13_HUMAN	Spermatogenesis-associated protein 13	SPATA13	7	481.751	2110.5						1751.96	1447.25	1083.09	2412.91		255.379	1000.1	234.502				2370.89	4734.62	389.505		561.65	4286.44		4340.36		2067.87					2095.27		1629.45	2635.74			138.325	1153.74	1371.76	1615.58
Q5XG87	PAPD7_HUMAN	Terminal nucleotidyltransferase 4A	TENT4A	15	1596.04	422.593	1154.43	705.472	559.4		175.396	3730.91	1626.23	571.226	6333.06	10747		1936.36	5373.46		440.715	7264.87	1003.35	413.673	726.047	152.706	7386.66	5000.76	10480.3		2418.49	804.175			106.626		293.639		2004.76	222.733	2307.36		11606.5	1660.56	3588.96	1867.84	7858.07	3701.35	14549.8
O00299	CLIC1_HUMAN	Chloride intracellular channel protein 1	CLIC1	53	654906	554202	589061	313858	358142	335385	181036	151609	136080	124814	275850	147935	154571	159237	114524	151704	109182	112771	79051	133912	141853	227469	157623	150971	160081	137165	201441	197114	201069	126055	115622	89993.5	361018	206515	221512	235393	126367	134604	115681	104686	119875	117193	111249	103427	104339
Q8N4N3	KLH36_HUMAN	Kelch-like protein 36	KLHL36	12	536.995	555.101	1163.84		15458.2	5064.99		243.414	337.758			293.241			347.212	362.334			3777.65		3859.13	1155.93			599.448		301.348		122.38		9333.9		177.361	250.68	849.61	2012.83	7749.63		1986.08	1562.28				1004.87	77.3267
Q8N0X7	SPART_HUMAN	Spartin	SPART	31	6758.99	2868.79	2444.66	4946.12			22916.9	27029.2	20180.4	23140	303.419	19211	18487.5	28979.3	17907.4	18695.6	17667.6	30338.7	29328.6	27954	24857.8	19787.1	25586.8	26479.9	17486.1	27944.7	19900.6	32427.5	22346.3	3444.63	3200.9	7761.87		18991.8	23112.5	10682.1	28915.2	30661.7	31360.7	27987.9	26329	28474.6	23944.4	27263.8	30061.2
Q6NUK1	SCMC1_HUMAN	Calcium-binding mitochondrial carrier protein SCaMC-1	SLC25A24	37	110175	72761.3	104721	139286	125807	123864	28586.3	35591.4	22310.3	24796.7	50867.6	25123.5	23595.6	19456.9	14640.7	16800.9	15505.2	13827.4	23026.8	25577.5	23321.5	53335.4	24523.1	22827.1	32897	42688.8	12515.1	10638.7	18664.6	7446.83	7700.57	14452.3	55253.8	27922.1	15551.9	18976.7	25205.6	28746.3	29902.2	35852.1	37971.6	23404.1	25035.7	27114.3	30414.6
Q6ZN18	AEBP2_HUMAN	Zinc finger protein AEBP2	AEBP2	10			255.218		342.264		738.867	832.618	891.778				753.697	5816.8				490.504	2198.9	2616.41	7508.97		2787.72		744.368	345.113		304.541	2662.35					666.562		899.418	320.151	768.899	1056.75	2310.1	313.482	1664.47	945.556	882.674	1680.99
Q16594	TAF9_HUMAN	Transcription initiation factor TFIID subunit 9	TAF9	17	11206.6	24086	33598.6	5677.54	1921.9	2349.06	3028.17	1368.67	633.976	427.296	220463	553.223	895.679	2243.05	622.656	649.748	1551.5	433.911	2229.67	4075.62	3663.91		4576.59	2336.45	42626.2	4848.16	4819.85	4379.86	4511	3564.52	7665.39	6529.31		1202.07	3973.81	2186.42	5084.36	4333.19	5453.76	6881.01	4166.66	5479.09	1046.73	2655.87	2665.28
P24666	PPAC_HUMAN	Low molecular weight phosphotyrosine protein phosphatase	ACP1	16	70711.4	72584.2	70755.8	37828.8	34807.8	38307.5	34515.2	32805.6	27766.6	12289.4		29132.2	32727.9	4669.84	6672.92	5126.18	20733.3	19947.1	44403.8	25690.9	25581.2	2507.16	25964.2	10745.6	26582.5	26588.9	16100.4	6565.09	8055.97	9146.68	12197.4	2100.31		2121.24	4376.04	1920.71	5393.06	21258.8	18285.8	6554.93	8053.7	7946.35	10001.5	11974.1	12070.4
P22223	CADH3_HUMAN	Cadherin-3	CDH3	16	1330.96	1302.21	6163.06	283.898	3938.4	3769.07	22446.8	2405.97		1787		5186.82	9817.94	6884.62	4162.8	920.095	64441.7				2276	7569.17	1447.65	5351.61	3882.06	11469.1		19029.9	2388.51	1580.07		779.153		1385.54	909.788	2138.82	2313.17		5858.64	8089.73	7552.04	9142.17	7008.12	5712.8	6383.15
Q13200	PSMD2_HUMAN	26S proteasome non-ATPase regulatory subunit 2	PSMD2	127	241475	179141	243228	340365	97009.7	92200.4	82813.8	72387.4	127103	85750.2	91752.5	105389	76102.9	45546.3	43563.4	82260.2	95968.3	80331	80278.4	86794.1	113022	356769	87959.4	106108	96753.9	113137	116003	156395	105174	107969	94270.3	81544.1	83469.8	99719.7	97127.2	117288	151817	153462	124314	89605.6	99892.8	150975	112200	101476	105650
Q8N465	D2HDH_HUMAN	D-2-hydroxyglutarate dehydrogenase, mitochondrial	D2HGDH	9	1277.48	30735.3	399.551	1149.04	1068.58	1353.04					201.566					9460.74								605.253	169.066	206.963			1334.03					1679.81										24630.4
Q6QEF8	CORO6_HUMAN	Coronin-6	CORO6	4		367.297							1896.68	1642.78	4912.26	3446.14			8638.6		3784.59				4517.45		4656.35	873.132	11677.3		573.18		1127.83		224.694				112.017		468.149	1890.6			891.503	981.553	2596.78	12329.6
Q8TEQ8	PIGO_HUMAN	GPI ethanolamine phosphate transferase 3	PIGO	17		2781.9	100062	6801.71	19744.1	4879.94		289.127		142.044	2370.42	1266.88	490.425		1132.53	358.945						551.496	35824.7	283.55		11321.3			1392.75			498.38	779.214			3764.94	1636.29	2317.97		702.683		263.869	2180.05	4629.47	6482.59
Q9BWX5	GATA5_HUMAN	Transcription factor GATA-5	GATA5	5	4757.53		3967.98				2817.11	1480.7													10481.3						462.841					3763.31		4905.3	215.404	5934.13	9350.7			258.487	2028.08	2093.35		2293.87
Q9HCH3	CPNE5_HUMAN	Copine-5	CPNE5	9	1217.46	477.322	413.097	1400.14	6161.03	8170.21	646.281	789.34	404.253	1196.31		383.247	514.128	929.224	372.241	529.64	404.211	3663.9	179.366	3508.05			689.464	6553.92	322.743	16264.4	919.435	907.423					366.877	3644.35	4789.32	3681.04	1478.53	7926.46	1593.54	7989.26	7282.82	4246.12	1019.51	1685.69	4470.3
Q9NRK6	ABCBA_HUMAN	ATP-binding cassette sub-family B member 10, mitochondrial	ABCB10	23	16993.7	27370	19596.8	16787.3	16765.5	13296.8	6121.13	3500.1	14797.6	17617.3	1614.6	9395.75	12238.6	15744.3	4709.94	4140.35	4608.47	11631.4	1249.46	5913.77	5992.19	962.771	20976.8	4570.01	8502.01	8980.91	1411.09	3168.21	2305.65	4271.5	3996.86	883.918	534.5	1981.33	1364.6	2559.47	11462.5	5912.17	13071.2	7642.92	11657.3	7191.61	4614.9	7020.17	5352.45
Q96KB5	TOPK_HUMAN	Lymphokine-activated killer T-cell-originated protein kinase	PBK	22	31055.9	33259	184619	10958.1	10319.4	1365.96	36640.9	40863.5	2890.82	52550.2	14421.9	49760.7	64518.5	33671.2	40005.7	44295.6	52829.2	47675.8	46552	120849	63743	710.621	68986.7	33917.5	34023	32721	49226.6	30964.1	33235.4	114588	114102	14929.4	11359.1	21775.3	31146.7	28593.4	52363.2	72394.9	60633.6	47861.8	34719.8	35299.1	62845	61769.5	96684.1
Q96PE2	ARHGH_HUMAN	Rho guanine nucleotide exchange factor 17	ARHGEF17	36	2408.6	1394.13	642.73		6133.21	7753.92	2531.88	3229.42	13001.8	7150.37	839.886	16524.5	4363.47	4330.26	1369.13	1678.89	3176.99	1160.19	4887.73	3969.37	892.661	727.665	16807.3	9592.75	3833.99	4923.06	12203.5	7753.47	371.297	292.851	11970.4	9561.97	832.494	26929.8	2260.6	415.231	771.623	13600.6	2962.33	595.457	871.034	7441.45	4875.64	231.818	453.897
O75600	KBL_HUMAN	2-amino-3-ketobutyrate coenzyme A ligase, mitochondrial	GCAT	15	5121.21	6395.1	11187.5	12724.1	681.155	10280.6	10180.9	8545.54	8936.75	8147.67	1630.39	9246.93	7811.82	8359.88	8240.93	8210.96	13105.4	1152.86	15112.1		6519.21		4682.93	18374.8	17464.2	20296.1	12614.3	10427.2	10194.3			233.956	445.678	14332.2	14784.2	12858	1553.44	4089.88	8780.14	12579.2	427.097	7338.23	1122.01	191.383	11566.4
Q9BSC4	NOL10_HUMAN	Nucleolar protein 10	NOL10	42	20336.9	89214.9	111075	26518.7	31966.9	25449.5	70190.8	9024.29	22597.9	40484.8	14707.9	42847.1	52141.1	18097.1	7885.22	47634.6	18082.9	14770.3	26931.2	41035.2	21222.4	3119.91	12599.9	11210.5	37845.2	38526.1	26273.1	34569.5	31667	859.919	1509.03	31143.8	400.674	30954	58423.9	27324.8	20952.8	15193.3	11681.7	26684.6	21475.3	18053.2	19791.7	11834.5	30958.2
Q14680	MELK_HUMAN	Maternal embryonic leucine zipper kinase	MELK	17	9421.39	41104.2	8333.04	422.791	2964.82	824.867	1320.12	2061.25	3936.7	7316.33	930.719	888.774	947.617	15043.7			10443.5	3992.52		15029	2054.86	5115.55	506.572	45853.2	39593.8	30975.4	37142.3	47611.3	45358.5	22579.8			261.178	1176.21	4190.26		10371	34073.2	27799.3	12545.9		13037.5	566.671	1210.54	8029.41
P45974	UBP5_HUMAN	Ubiquitin carboxyl-terminal hydrolase 5	USP5	61	214713	218722	155402	104125	96166.9	101931	74006.9	49794.4	50480.2	58676	79705.5	57604.6	62995	44044.9	73077.5	68362.9	58601	77884.6	34600.8	49279.4	53883.1	92350.1	120422	64969	45672.7	67728	63604	61268.3	79054.9	30776	31941.2	38985.1	55395.1	58178.4	58134.1	46719.9	63227.5	67236.5	77264	65011.1	61069.4	73997.2	56751.3	76559.6	59527.9
Q9Y6M1	IF2B2_HUMAN	Insulin-like growth factor 2 mRNA-binding protein 2	IGF2BP2	34	101676	93803.4	80134.9	194942	34803.2	38145.5	8641.56	3806.05	12573.3	15236.8	16098	9697.73	5008.42	19662.5	32745.1	6526.57	11423	28395.5	13268.7	24129.3	8969.65	18499.2	8168.79	3150	3601.68	6428.34	6123.02	9768.55	6944.24	2825.81	6291.11	12516.2	14378.9	8465.51	9489.33	19179.7	13301.5	70295.5	75928.6	11418.5	9720.83	9044.07	25089.1	17062.1	11791.8
Q86UP8	GTD2A_HUMAN	General transcription factor II-I repeat domain-containing protein 2A	GTF2IRD2	2						2379.38	11033.9	10629.8	9955.9	9936.82	966.12	10011.1	11633.9	11465.7	10959.3	10864	7803.4	9403.25	8346.32	9529.28	9984.53		9608.32	10999.7	11467.2	11298.2	4224.46		4134.72	2072.33	2091.06	3168.33		3072.02	3600.3	3212.1	5091.56	4823.48	5086.63	5997.33	3791.06	9302.73	4237.84	1307.45	4233.6
Q96JG6	VPS50_HUMAN	Syndetin	VPS50	49	8956.33	16573.4	10573.6	7619.01	6152.33	15793.4	3030.3	3375.39	4800.32	333.43	1660.1	13811.6	6674.96	619.328	1851.85	1142.63	2173.26	2352.02	1384.25	4702.93	36738.9	1342.49	1062.28	11683.6	9928.39	2820.37	5430.71	2475.7	3490.52	3774.54	3965.77	15310.3	18138.7	10248.3	5247.83	3617.79	4506.61	3997.05	4368.01	5045.91	6826.23	3033.82	196279	1093.12	801.811
P41279	M3K8_HUMAN	Mitogen-activated protein kinase kinase kinase 8	MAP3K8	5		376.098		24016.5	5223.37	5506.09		2662.69	18538.9	3565.62	4545.21	2819.33	2513.85	3556.11	3004.76	2794.28		2140.86	2636.32	3195.5	3176.99	555.884	2324.47	1698.23	1342.26	1490.31	2991.47	4823.56	3630.37	4024.62	4301.2	4381.57	484.652	3958.36	5005.52	20430.8	2517.92	8719.3						1639.36
P0DME0	SETLP_HUMAN	Protein SETSIP	SETSIP	16	16955.2	19389.8	16571.6	5119.52	6241.52	4442.83	48650.1	131497	128735	111629	5693.84	100673	129664	58139.2	59294.3	67018.7	160870	103259	97190.1	122489	147920	4706.49	151596	90278.5	64410.3	81351.9	111724	118182	141300	20017.6	17213.7	120453	6072.24	18802.7	154541	45534.8	62377	32612.7	28001.7	34429.2	35634.7	31226.3	55138	62556.6	65526.6
Q9NZN5	ARHGC_HUMAN	Rho guanine nucleotide exchange factor 12	ARHGEF12	39	14651	18907.9	25554.5	2527.2	67305.2	24175.9	83274.9	14771.1	12907.4	76933.1	371.719	32520.9	9792.65	8745.55	2474.51	36649	36943.9	18509.7	8609.47	14873.8	9961.24		7885.87	6583.82	8786.41	10608.3	6808.9	13340.1	8291.73		1448.29	2041.98	2802.26	9138.81	107708	7276.07	44939.5	54969	48402.3	7790.07	51065.7	7832.02	5346.67	6929.69	9099.05
Q8TE76	MORC4_HUMAN	MORC family CW-type zinc finger protein 4	MORC4	6					1485.5		19322			13888.2		4640.58	219.26	94.2549	1867.8	125.484	12152.3	6272.44	12185.6						720.911					10273.4						20772.9					2236.81		1021.28	136.347
P46019	KPB2_HUMAN	Phosphorylase b kinase regulatory subunit alpha, liver isoform	PHKA2	37	134409	1929.34	814.357	9562.06	2721.4	4248.02	3478.14	1401.46		3617.93	6134.34	223.112	2039.79	27716.1	1754.29	391.02	65239.9	376.098	2807.32	2790.19	904.582		83607.6	3881.74	1190.99	46933.2		12042	4772.08	647.722	2311.16	1208.47			1665.33		500.565	63136.4	2221.07	765.42	6880.64	675.405	43137.7	609.523	64879.4
Q9NRX1	PNO1_HUMAN	RNA-binding protein PNO1	PNO1	11	9029.08	9024.6	5983.22	3384.79	2871.48	2852.28	4549.6	3765.58	2206.55	5644.48	2454.55	1137.65	3650.02	2652.36	4167.51	5620.87	7872.53	8113.94	6273.62	6130.85	10881	2336.81	6849.21	6510.06	10400.8	7456.42	2326.61	3363.87	6003.53	1116.04	2011.64	3558.2	2252.94	2748.22	2343.6	2072.53	8879.23	8526.19	10194.6	8110.48	7825.03	9090.88	8126.13	7865.06	6547.3
Q9BQI6	SLF1_HUMAN	SMC5-SMC6 complex localization factor protein 1	SLF1	9	695.843	535.632	500.676					514.953			15958.2	1300.28		109.653	1016.28	2662.64	487.206	259.815								12121.4		660.11				253.397											1737.44	719.908
Q9UFN0	NPS3A_HUMAN	Protein NipSnap homolog 3A	NIPSNAP3A	15	961.359	1415.52	2639.22		4659.44	5663.7	2521.59		2421.6	1877.21		4868.58	7985.5	537.876	328.581	962.067	6527.43	2703.41	4702.29	639.746	1547.09		8885.42	2280.61		3034.66	3781.1	236.15	8191.03	261.924		672.863	641.125	530.842	1053.88	8438.49	379.713	9503.3	5821.1				2335.72		3043.67
Q16644	MAPK3_HUMAN	MAP kinase-activated protein kinase 3	MAPKAPK3	17	15295.7	15642.9	18831.4	4755.35	4400.11	2995.94	3443.56	528.127	7227.88	655.444	1612.82	708.272	2129.23	211.598	25172.1	380.82	213.512	1054.71	1696.8	5145.03		3173.87	6669.75		942.204	1879.94	791.352		313.49		2374.25	487.111	3894.48	8246.92	5901.03	380.783	4137.21	1842.96	1752	283.378	519.793	1018.71	5107.09	757.688	2124.99
Q9NZC3	GDE1_HUMAN	Glycerophosphodiester phosphodiesterase 1	GDE1	4		172.247			827.337	239.791	438.371	641.231		684.556							1268.66	915.558					195.96	687.311		499.197					1216.88	920.101		567.047	933.836	692.639	1003.46	2895.03	746.504	1761.5		923.291			1146.15
Q86Y13	DZIP3_HUMAN	E3 ubiquitin-protein ligase DZIP3	DZIP3	10	472.975	1101.1	187.496			754.038			247.364	2536.01		54.7637	298.075	388.449		512.721				616.461					14938.5	3947.33		1221.83							3014.16	1674.39	265.23				340.138	3438.1
P0DI81	TPC2A_HUMAN	Trafficking protein particle complex subunit 2	TRAPPC2	5	1501.12	1293.55					207.336	28942	374.344	3029.32		3705.53	3176.18	3097.72		312.634		2241.89					4723.76	27737.9		26979.3	1812.5	951.369	2894.96					531.27			4928.06	1787.94			908.644	180.742	2278.99		7680.72
P17081	RHOQ_HUMAN	Rho-related GTP-binding protein RhoQ	RHOQ	10	13213.5	15909.3	15922.6	18387.4	28404.7	18490.6	33573.4	74880.4	64659.5	58704.7	25903.3	59866.2	51411.8	62856.8	59561.3	63397	31278.6	46729.8	46503.7	46662.8	27662.6	36020.7	46079.2	51402.7	49979.9	51826.8	57788.3	58673.2	49365.9	58985.1	54970.8	52298.5	36910.7	51264.6	64919.6	63630.4	30060.3	31903.6	36868.8	29362.2	37188.7	30176.1	24187	26220.3	29062.7
Q5VSG8	MANEL_HUMAN	Glycoprotein endo-alpha-1,2-mannosidase-like protein	MANEAL	7			595.518					827.172		779.723	510.183	1429.84					3391.62																		32048.4						148.236
Q8NAN2	MIGA1_HUMAN	Mitoguardin 1	MIGA1	17			20055	1439.05	160.603			753.246	1204.29				57.2852	1575.5		782.675		4155.49	926.978	5175.17			11212.8	219.732			7856.15	748.786	806.053										453.795	11961.7	953.27	107.525		8057.77
P05387	RLA2_HUMAN	60S acidic ribosomal protein P2	RPLP2	47	362411	324181	170215	245436	329088	10745.7	77637.9	164500	107627	109158	61855.4	20202.3	26409.2	33388.3	7489.43	11481.4	151352	147568	40015.3	171684	205183	9111.16	82160.1	195419	38015.9	46306.2	15954.6	15219.9	33747.8	53285.9	23791.7	69284.6	56142.8	21931.2	15121	14428.4	65707.7	63381.6	62824.4	41575.9	38768.4	41341.3	64904.7	66036.3	67245.4
Q96RP9	EFGM_HUMAN	Elongation factor G, mitochondrial	GFM1	61	27542.5	29102.4	17061.8	17312.5	17659.4	18753.7	33660.7	75330.2	37127.5	19801	4851	36440.3	47102.6	14336.7	27984.6	22286.6	38081.1	19798.7	35135.5	57907.3	26046.8	406884	23431.9	22989.4	45526.3	52496.5	13621	14105.1	25003.4	7071.32	8365.09	6925.27	6026.24	12923.4	10535.8	23017.5	33041.9	35762.7	38119.8	25014.4	31186.9	47362.2	33968.2	38904.8	34578.8
Q92754	AP2C_HUMAN	Transcription factor AP-2 gamma	TFAP2C	12		1636.79	172.409	3131.32		1010.47	2171.1	11942.2	2051.3	5979.53	10091.2	13013.2	3081.62	14285.9		8798.89	2602.45	10807.1	5101.36	12676.8	3410.9	714.376	9695.09	2482.31	5252.78	4356.98	4045.9	2822.88	2027.57	1575.36	3291.12	3097.56		3389.38	840.762	1467.92	10736.5	5648.87	2937.47	3893.2	1551.17	2013.99	5017.24	6951.65	5475.24
Q9Y324	FCF1_HUMAN	rRNA-processing protein FCF1 homolog	FCF1	8	3108.35	2646.52	2451.18	2750.42	1890.83	1982.44	6589.12	4678.92	2455.78	1918.25	2128.1	3552.1	2728.15	4447.64	3694.35	4247.63	5248.1	4112.11	3571.52	5262.01	4310.4	2732.81	3140.01	5383	4165.84	4438.8	2250.68	3096.45	3896.75	4337.07	5443.68	4599.63	2780.56	4412.35	4979.71	3918.4	6364.3	6033.79	10752.2	6352.4	5410.37	15018	4707.18	5736.72	5981.1
Q9BPX5	ARP5L_HUMAN	Actin-related protein 2/3 complex subunit 5-like protein	ARPC5L	13	6665.48	5142.05	5432.03		1198.66	137.026	15859.7	17630.6	775.487	2074.13	470.266		16788.5	1027.53		569.069	2690.13	2588.83	1283.3	5504.54	4344.54	652.148	10655.4		1004.77	1015.47	563.374		629.405				315.217	2502.6	2027.29		2505.4	2715.86	2699.14	3372.99	2997.93	9314.18	2220.63	2420.45	3173.75
Q15438	CYH1_HUMAN	Cytohesin-1	CYTH1	16	2208.22	4343.28	7181.56		23311.4	849.884	198.725	335.113	5275.9	1156.65		5280.77		11710.6	1843.46	6428.68	832.135	2258.24	670.68	462.356	897.028		1403.84	6628.49	422.76	241.64	1880.64	6535.35	1101.3		3094.07		633.771	885.67		524.318	5160.88	19687.7	286.036	2599.55	742.505	1271.28	301.188	438.45	203.691
Q7Z6B0	CCD91_HUMAN	Coiled-coil domain-containing protein 91	CCDC91	17	1280.23		11163.6				1084.53	3471.99	270.658	3037.99		2364.43	747.205	1700.02	62846.7	396.312	700.747	2458.59	343.875	1223.98	610.005	6698.93	1649.05	416.231	1052.71	1203.73	7915.41	3095.85	5806.25	1218.4	1711.02	1972.3	267.925	2028.48	21061.1	625.682	898.449	2035.31	5535.76	443.484	751.058		796.111	1875.49	1292.79
P51688	SPHM_HUMAN	N-sulphoglucosamine sulphohydrolase	SGSH	10		698.797	348.294	18761.7	332.975			514.965						15746.8	4223.99		696.989	3333.84	2879.02		20285.6	1551.96				5396.33	1329.59	1838.8	1421.19	3321.64	280.672	779.765	1822.27	150.682	26951.4		15082.4		81.9989	2566.84	44886.6	5082.67	14332.3	3976.73	1475.21
Q96I34	PP16A_HUMAN	Protein phosphatase 1 regulatory subunit 16A	PPP1R16A	7			846.76	358.285	3371.07					464.664	444.812	752.762	934.832				94.7917										911.433							544.36
P06241	FYN_HUMAN	Tyrosine-protein kinase Fyn	FYN	24	22532.9	20641.4	18546.7	14975.9	24863.9	10378.1	7275.45	10924.6	4159.02	4375.66	5467.41	6160.17	5853.54	4014.19	2246.69	4564.1	13934.2	11328.2	6992.5	8069.51	31163.1	6062.28	14554.8	12179.8	12269.1	13061.1	3451.44	9409.8	9315.73	3844.15		1013.84	4913.17	3031.3	3114.93	63430.7	10861.4	3505.66	12777.2	7427.88	6188.68	115988	9743.31	5963.65	10375.9
Q5JUX0	SPIN3_HUMAN	Spindlin-3	SPIN3	11	28879.2	6719.29					208.283	571.896	252.373	58522.2		620.502		605.078	41883	1794.22	2377.68	1942.98	2097.82	9347.44	1441.59			671.581	1458.99	95.7416	1366.93	1833.55	5430.52	258.71		480.488		1314.19	294.269	1563.95		550.637			1444.62		260.098
O75410	TACC1_HUMAN	Transforming acidic coiled-coil-containing protein 1	TACC1	29	7788.12	113578	7562.05	33434.8	2446.12	31622.5	11916.1	7855.83	5381.38	3662.72	5924.37	5854.18	6746.56	6673.24	5947.14	15850.8	12663.4	4168.2	3645.72	5458.32	13510.7	133873	19988.1	15545.8	7591.38	9518.4	12817.1	14376.9	10157.1	14283.8	1372.49	1765.82	145244	2248.33	14315.8	14582.8	33550.3	29276.7	2643.78	8316.09	2766.45	8421.03	2410.69	16133.8	1761.98
Q8N0T1	RBIS_HUMAN	Ribosomal biogenesis factor	RBIS	9	333.282	436.962		4030.46			529.241		1604.54	699.71		341.469	348.499		3089.68		1320.92		7742.37							832.906						264.828		713.612		261.16	860.147	1128.59		1844.81		1654.13	2955.36	1344.84
Q86V40	TIKI1_HUMAN	Metalloprotease TIKI1	TRABD2A	6			374.765	336.306		147.556												533.439			1416.8	578.979		462.323		1017.08										1485.25		2326.01						694.711
Q96IK5	GMCL1_HUMAN	Germ cell-less protein-like 1	GMCL1	9						2014.52	139.709	6850.96	277.909	89.5034		64.6841	97.562	6918.15	3406.98	393.249	277.074		152.225				135.335	1095.31	958.715		1361.07		1076.42		198.257	132.741			1092.85		3702.2	709.369	269.92		1617.41	219.413
Q86XA9	HTR5A_HUMAN	HEAT repeat-containing protein 5A	HEATR5A	45	1313.99	11110.5	852.894		2475.77		10243.3	13719.8	6810.92	11583.6		14218.4	7664.4	8520.58	13983.3	4369.14	1962.37	4558.83	11879.9	8203.1	16502.5	233.248	8578.64	8976.69	9042.11	10431	8632.8	7770.86	9832.21	5706.57	11376.2	38936.6	620.335	8899.55	10240.2	9675.33	20459	26705.3	27353.4	6672.44	7124.83	1506.07	2270.46	5859.57	3470.84
Q6ZW31	SYDE1_HUMAN	Rho GTPase-activating protein SYDE1	SYDE1	17		826.825			23543.5	22636.5	1581.48	3608.49	1500.78	4640.68	1573.31	1387.92	2300.19	798.168	3398.53	1133.46	2808.33	1947.62	2228.05	1398.63	1386.28	3007.95	1089.48	1066.72	2604.96	2811.95	2930.14	6045.23	4397.63		245.04	1932.95		267.775		2023.63	315.371		3606.81	3159.72				2612.56	2784.21
Q641Q2	WAC2A_HUMAN	WASH complex subunit 2A	WASHC2A	42	5144.72	2448.11	2149.97	1020.38	1775.39	22248.5	6466.16	20295.4	10737.5	36251.5	8848.2	40648.9	10832	12528.5	75340.4	5118.2	17035.5	28890.8	20683.1	40536.3	13654.5	12887.6	12131	6092.57	39531.7	14983.2	32217.6	18659.7	13874.1	80894.6	7286.82	8030.32	7722.67	28601.7	28011.4	18800.6	8625.92	11223.8	1487.99	2644.28	10201.8	3141.29	3666.25	7384.24	7804.37
P06276	CHLE_HUMAN	Cholinesterase	BCHE	5	16304.1	8643.55	18802.9	82734.2	116066	94370.9	79950.4	57375.7	61815.1	103327	38232.9	82642.8	78812	75992.9	118261	90287.2	127615	109711	73682.8	424.895	98522	41404.6	83305.1	56112.9	59636.8	51971.1	82876.2	64096.2	83103.2	52161.6	52911.4	58716	35519.3	100140	66259.1	78275.6	61755.7	64565.6	58390.5	68711.2	72235.1	76957.9	69240.4	67573.1	73617.2
P11413	G6PD_HUMAN	Glucose-6-phosphate 1-dehydrogenase	G6PD	90	202526	141555	136791	89039.7	87404.2	205456	151332	119317	138752	151956	115588	138038	129569	147285	137739	124955	83007.1	79922	88151.9	62259.7	80160.5	193038	82914	116235	100331	80521.2	553480	536019	550090	269048	314609	245786	250413	468342	500046	475958	276922	289021	277516	227508	232677	227424	234494	206655	230843
P52435	RPB11_HUMAN	DNA-directed RNA polymerase II subunit RPB11-a	POLR2J	19	583.876	18581.4	3295.69	5120.5	548.994		4392.67	2033.09	2067.35	8155.27		13351.3	4769.12	2617.95	3742.87	4721.02	1435.49	3688.12	3282.12	2958.56	2005.42	16998.8	3582.06	4030.14	3216.5	3560.42	945.147	1545.1	1430.69	9479.77		226.431	18344.1	1978.62	1661.67	973.2	720.637	1225.46	2854.07	2389.32		996.785	5089.45	28129.3	3208.32
Q9Y253	POLH_HUMAN	DNA polymerase eta	POLH	10		9558.45	1355.79			473.248	172.063			6051.62			63.2806	189.373			8998.35	15555.7				1028.1					8920.49	7162.55	17245.7			1300.87		3587.84					5873.27				362.787
Q7L8W6	DPH6_HUMAN	Diphthine--ammonia ligase	DPH6	11		1691.56		978.032		263.883	1584.29	1010.79		1711.13		614.671	676.428	1331.28	650.91	6825.1	2212.48	638.288		1350.52	586.91		653.781	995.664	670.773	676.163	3178.76	1351.43	3872.25	635.053	644.733	1266.42	14029.6		1028.37	809.42	2061.42	1468.89	1938.39	1764.79	2111.43	1927.74	1167.07	1385.81	1718.97
Q9UEY8	ADDG_HUMAN	Gamma-adducin	ADD3	21	963.337	1653.23	1526.13	786.062	5676.49	1151.62	2783.97	3007.22	9356.89	13896.6	2651.39	4885.89	37864.5	5882.5	1852.66	3909.94	12530.7	1754.62	3296.37	3726.19	5173.68	3498.57	13929.6	1285.6	1858.37	2128.85	453.805	3191.66	777.098			1017.61	9165.03	11686.7	11085.7	37294.7	4365.68	5210.58	37815	74907.2	24183.1	2344.83	1834.53	27054.4
Q99471	PFD5_HUMAN	Prefoldin subunit 5	PFDN5	17	19723.2	17630.5	9876.67	11251.1	14049.3	13517.6	51642.7	55178.1	45731.1	39926.5	34382.2	49844	53914.1	40735.8	41779.7	43927.7	31440	33870.2	31618.6	34274.2	34897.3	28713.9	37986.4	39454.9	42856.6	41159.6	45447	41332.2	36236.7	26381.6	27911.1	27651.6	27845.9	44410.6	55837.4	43198.8	30294.1	27808.1	29761.9	15708.2	16981	20554.1	16398.3	17229.5	17562.6
Q96D31	CRCM1_HUMAN	Calcium release-activated calcium channel protein 1	ORAI1	3												237.307								211.763
Q8IYE0	CC146_HUMAN	Coiled-coil domain-containing protein 146	CCDC146	5	6206.67			3063.7	2861.77	25620.5	4171.64	8400.44	2622.54	2919.26	881.86	2611.05	2946.39	1946.76	1063.74	1474.61	1384.01	570.694	1805.56	1257.18	2292.67	217596	1530.89	2497.56	1897.56		2288.8	1974.65	2525.13		1609.05	649.363		4808.38	3651.4	718.483	2309.34	2335.74				812.98
P00966	ASSY_HUMAN	Argininosuccinate synthase	ASS1	90	26239.8	56209.7	74500.4	9296.93	30763	23549.2	89512.1	173220	67080.3	221887	189524	212423	121651	124675	100670	75251.9	91065.1	69420.4	95820.3	89207.8	96497.4	19814.5	106070	177688	179013	183477	144685	121399	111066	64565.3	122480	113314	19631.9	253034	195591	264285	79248	58927.8	17575	29508.1	17514.5	24318	57950.5	31181	56146.4
Q9BQQ3	GORS1_HUMAN	Golgi reassembly-stacking protein 1	GORASP1	5	426.718	1132.93	754.91					912.916		790.134						492.019						739.542					2001.69	308.584	986.98										1793.43				598.737
P01031	CO5_HUMAN	Complement C5	C5	7		4430.51						2221.35	2445.86	1972.11	1885.8	2004.59					4329.42			4726.23	279.721			212.384			336.156	243.404		464.869	514.272	456.465					2761.79	2560.91	34720.1	3234.03	4041.01	3708.68		3018.11	2679.41
P50570	DYN2_HUMAN	Dynamin-2	DNM2	80	63258.1	59564.5	45798.5	24232.2	13516.7	9397.54	26431.7	32092.8	83070.2	23200	25480.9	25490.6	39091.1	18537.8	14357.7	23370.9	28497.1	45177.9	18154	28243.2	45435.9	7293.79	24701.3	24755.9	48981.9	59531.2	39774.8	61247.7	40916.8	11059.8	11834.3	12663.5	5323.08	34548.6	84260.4	40563.7	27413.2	16847.4	27423.3	250418	48907	71837.6	39434.8	87506.3	48337.3
Q14693	LPIN1_HUMAN	Phosphatidate phosphatase LPIN1	LPIN1	26	29680.1	19539.5	10294.4	2498.2	1010.04		6024.12	58922.8	52867.5	63036.3	279.774	56638.8	63632.9	53381.2	70827.5	56891.5		59766.2	9547.84	93501.9			1143.86	4984.82	351.421	572.874	539.339	425.503				7345.46	2305.41	4355.57	340.351		222.278	1062.66	1626.53	20095.3	745.205	816.018	1402.63		80336.9
Q9UNZ2	NSF1C_HUMAN	NSFL1 cofactor p47	NSFL1C	31	13704.5	7833.95	8410.94	2525.11	28449.9	1936.59	18493.8	33057.2	31152.3	27477.1	13705	19592.2	23467.6	12456.8	21227.1	15363.3	26832.8	39442.8	29973.5	18680	22253.5	19174.9	88721.7	20246.6	50665.7	19420.8	18619.6	20003.9	27010.6	10804.7	5183.52	7396.16	24120.1	13912.6	20476.2	20070.5	12988.2	14082.7	69730.9	8884.13	41104.8	9069.92	8973.7	10325.6	8689.48
Q86UV5	UBP48_HUMAN	Ubiquitin carboxyl-terminal hydrolase 48	USP48	38	27052.7	20237.2	23582.4	1217.23	9865.64	13197.1	17518.2	16899.8	13107.1	16785.7	5023.08	13184.7	19891.4	7304.16	8153.64	8977.01	10961.8	11874.7	10173.3	11139.5	15533.7	606.64	25900.3	36606	17112	17993.5	9203.16	5984.77	7745.13	4025.32	9584.59	2219.51	193.581	7887.78	6772.02	8815.97	11978.3	17814.8	14624.3	13011.1	9766.68	12043.8	14505.7	11448.1	12764.6
Q86YW9	MD12L_HUMAN	Mediator of RNA polymerase II transcription subunit 12-like protein	MED12L	7			12766.1	143.057			2811.81	715.583	1196.37	391.991		551.819	615.996	433.026	394.548	597.605	488.067	463.393	312.572	657.514	982.935		513.815	1589.01	748.142	1023.33	404.798	712.292	1200.58		639.192	412.528		1493.99	513.972		895.207	702.504	1869.94	434.229	1130.83	572.639	267.281	798.705	343.886
P15170	ERF3A_HUMAN	Eukaryotic peptide chain release factor GTP-binding subunit ERF3A	GSPT1	63	78579.5	109901	23344.9	46441.6	57024.7	54522.6	83965.4	70486.6	52116.7	50963.6	67999.1	60096.2	57430.4	52502.6	73926.2	53751.7	54364.7	50603.6	50775.5	55741.3	69492.5	88289.6	62366.3	63799	58438	62555.4	78264.7	88204.6	81390	74786	71188.6	60988.2	68499.5	64549.5	82896.7	82319.3	56927.5	32236.1	40068.8	30053.6	47837.5	54805.4	34709.5	25447.7	35137.6
O15431	COPT1_HUMAN	High affinity copper uptake protein 1	SLC31A1	3	9302.94	10663.4	2359.46				13615.4	451.554	1153.97					878.412	798.788					212.602	1132.11			180.385							8701.83	88.3078		1117.85	1186.09	661.751	132.672	154.724	692.535						919.634
P49023	PAXI_HUMAN	Paxillin	PXN	23	8673.9	7470.52	14195.3	1822	2662.73	2859.29	33133	5185.76	3702.71	3062.24	6652.28	4154.62	4277.71	3196.48	3911.68	3371.89	2145.14	1876.03	2488.16	2534.25	2981.14	10453.8	26611.5	3125.52	3825.52	38544.5	10328.1	11048.2	11022	8689.37	3092.69	9519.38	9389.54	9592.73	11962.2	9003.85	5767.45	6829.46	8046.18	7431.4	5828.45	5853.69	19726.6	6729.13	8180.29
Q13952	NFYC_HUMAN	Nuclear transcription factor Y subunit gamma	NFYC	15		9875.63	7520.39	1096.64	6585.84	478.354	10760.3	2511.69	2082.14	10599.2		3335.51	3312.52	3092.85	7761.06	6010.83	3036.02	9448.48	3331.66	2176.44	3087.6		6853.25	3713.43	5794.23	32557.2	2791.13	4282.23	4174.95	1591.81	1453.07	5987.88		9718.95	3330.74	4379.97	2589.12	3435.3	2890.2	66040.9	2556.35	924.429	18466.5	21324.9	1469.09
Q3KQU3	MA7D1_HUMAN	MAP7 domain-containing protein 1	MAP7D1	25	4308.79	1965.49	2975.95	6572.95	4348.05	6718.99	26625	5662.1	2809.12	6303.61	1311.52	2389.03	2257.18	1581.77	1619.5	1808.3	2032.22	2429.08	3841.47	2337.08	3784.82	8187.27	23426.6	2359.95	2704.18	3619.55	18666.9	18021.4	7795.77	8108.17	7039.93	10615.8	5132.01	10637.1	15154.5	10722.3	12424	8082.63	8930.66	8112.53	9554.17	12195.7	9082.98	8953.37	7630.18
Q9NUS5	AP5S1_HUMAN	AP-5 complex subunit sigma-1	AP5S1	6	1158.94	490.36	1557.69		1009.49			974.571					180.749	371.574	1450.5	273.355		146.009		303.425				196.315			364.923		202.127			911.572		1247.64	7489.46		128.3		321.534	9263.69		1764.43	745.187	8167.17	7854.88
Q96EK9	KTI12_HUMAN	Protein KTI12 homolog	KTI12	20	575.967	4683.82	5471.2	1436.32	1004.68	58997.1	2117.47	2117.15	3038.29	1231.71	906.859	6110.84	820.607	1179.74	2994.17	2373.43	1770.86	3844.09	3828.93	6180.06	4739.68	2604.66	2123.8	2496.15	2023.49	1384.17	2223.27	19965.5	2201.48	19647.5	2274.56	1573.34	1633.96	2868.81	2608.1	20538.2	4833.75	3487.16	5052.45	8795.8	11564.2	4379.99	3811.21	3517.72	3587.72
Q9H2U2	IPYR2_HUMAN	Inorganic pyrophosphatase 2, mitochondrial	PPA2	47	29827.1	39383.8	32595.1	27322.5	36229.7	46462.9	26960.5	19304.5	17681.2	13498.3	16651.7	18227.8	13864.4	23768.4	24860.5	19506	18634.8	28549.1	39843.6	19773.5	28128.6	38857.9	17392.1	22293.7	32851.2	20724.9	86930.1	15756.4	22342.1	16723	20979.4	17455.4	29331.3	47838.2	48941.7	92238.4	29134.9	32246.5	37035.3	40653.2	55215.6	45179.1	80536.3	43319.3	30462.3
Q6L8Q7	PDE12_HUMAN	2,5-phosphodiesterase 12	PDE12	33	66005.8	68717.5	59555.3	25053.2	43837.5	47307.6	22479.2	13408.3	13222.1	10384.3	19964.4	12270.5	17420.9	9957.59	8015.32	7440.25	16838	7935.49	20341.1	11486.7	10066.1	6480.61	14477.2	35536.1	13596	16807.9	17245.3	17041.5	16378.9	2730.2	2605.34	3498.05	15003.4	12542.6	15072.5	11273	14026.8	16577.6	38290.8	15347.8	12333.4	12490.3	28964.4	33578.5	29780.8
Q8IY17	PLPL6_HUMAN	Patatin-like phospholipase domain-containing protein 6	PNPLA6	54	18247.1	15451.6	16440.9	9869.91	12804.2	13051	26296.5	96696	15558.6	11181.2	8094.5	11088.9	9743.04	11362.6	6544.4	9471.33	13952	19220.5	9454.54	146519	11884.6	6036.9	9264.96	30940.3	11449.4	9313.66	17941.6	8898.94	106498	7146.38	11377	13722.2	5980.02	8050.57	13532.3	15946.4	17898	9513	32011.7	16094.7	17028.3	13157.7	12402.4	15436.9	22804.2
Q5VZL5	ZMYM4_HUMAN	Zinc finger MYM-type protein 4	ZMYM4	41	10440.1	3971.11	4391.8	12589.6	5464.44	4629.16	12973.7	15586.5	12488.1	11970.6		8399.2	11417.6	8398.02	15854.6	9560.34	6936.52	13770.3	76093.1	6585.32	9011.88	7616.22	15217.8	3931.83	10067	14108.3	9101.63	18354.1	11036.7	3675.39	14501.4	7630.72	12142.5	9162.98	7548.61	12142.5	11561.7	13516.1	14434.9	16078.4	16800.5	37629.3	13972.2	11430.9	12698.3
Q96BM9	ARL8A_HUMAN	ADP-ribosylation factor-like protein 8A	ARL8A	19	38576.9	47208.8	39650.8	21919.3	24027.7	19134.5	11814.3	19569.2	14563.9	15094.7	25628.2	13379	27915.4	5223.81	18976.2	15004.7	14377.5	15071.5	16005	14751.1	20337.3	46155.9	16919.7	17726.7	16563.7	22686.9	19672.3	43422.5	20429.7	13172.9	14377.1	13144.7	54941.9	21999.3	45131.3	23138.9	19487.6	19776	18952.2	12553.3	19239.7	22068.4	40075.3	23509	21366.6
Q32MK0	MYLK3_HUMAN	Myosin light chain kinase 3	MYLK3	6							1916.15		338.868				3344.59		2822.15				311.778	547.763											760.526							902.146	4590.03
Q9C0H2	TTYH3_HUMAN	Protein tweety homolog 3	TTYH3	4							144.716	172.521	1165.14								286.832							393.874	112.109	1089.7			145.158			2252.84			1448.86			916.684	641.583	1176.67	2586	2440.54	2244.8	944.784	397.596
O75165	DJC13_HUMAN	DnaJ homolog subfamily C member 13	DNAJC13	110	37623	38412.9	60678.2	6151.19	12049	15467.2	7292.91	10417.1	15407.3	55291.5	3711.25	18520.9	22092.9	21507.2	21999.7	22530.7	49752.9	26640.1	15439.7	32676.2	27242.6	41657.8	18101.4	37512.9	22560.2	61183.7	34323	53252.7	35898	22818.8	3120.45	19838.3	6142.19	34759.4	24119.5	89845.7	23663.2	27055.7	115875	7897.69	9397.16	8094.16	39611.3	22086.3	5536.94
Q9NXA8	SIR5_HUMAN	NAD-dependent protein deacylase sirtuin-5, mitochondrial	SIRT5	13	6722.88	7835.53	7208.82	6328.18	5950.81	4367.56	2166.61	5557.23	2841.57	2355.7	1800.14	1303.77	5276.66	728.801	507.321	1419.14	3672.28	1571.38	2449.62	967.18	2993.72	24617.7	32458.5	5400.31	1399.2	3444.24	1483.45	1441.12	3965.17	406.027		348.77	26091	3115.59	777.641	3045.93	2554.2	876.148	1449.5	2883.84	1455.09	1272.1	1197.2	1324.39
Q5VV52	ZN691_HUMAN	Zinc finger protein 691	ZNF691	5				6469.52	343.133	487.506			280.395	296.485		361.024									698.313		3803.39	5772.38															197.319					230.022
Q8NCH0	CHSTE_HUMAN	Carbohydrate sulfotransferase 14	CHST14	12	290.642			2290.95	310.737	3534.58		314.609	2729.58	164.082	619.491		1502.78	20962.3	1182.3					771.019	347.385	199.672	644.367	955.472	3055.86	658.851	381.031	6353.79	624.23	958.193	699.292	1021.68		164.875	190.219	1519.06	1526.08	2852.61	1464.62	1207.49	1517.49	1344.51	822.346	1684.58	3450.17
Q8N884	CGAS_HUMAN	Cyclic GMP-AMP synthase	CGAS	26	4182.37	5192.43	13243.3	23475.8	2063.35		567.281	18752.9	18001.3	18194.2		13237.2	24818.7	47334.8	11843.9	20551.4	3033.01	6930.73	10446.9	13634.3	5164.53	2248.1	7856.17	14845.7	22994.3	21525	2395.89	2838.01	2432.48	1833.93	465.829	410.518		7055.51	9524.6	20139.2	13065	5349.37	20706.6	18052.7	7320.49	4375.49	14950	33044.5	13569.4
Q8WWH5	TRUB1_HUMAN	Probable tRNA pseudouridine synthase 1	TRUB1	25	3712.03	16774.4	2765.92	3179.28	1393.12	1329.63	7506.3	23591.6	9444.08	3699.6		6325.74	29686.5	7067.72	7506.97	7074.97	6312.02	6353.27	6558.63	6508	6593.53	1236.49	6761.1	6549.8	7966.47	6897.12	13739.8	10755.7	18512.1	8655.26	287.047	4532.61		25513.2	9324.57	22673.4	15343.9	13803.4	14425.1	28204.7	29341.1	22864	9232.1	15385.7	10336.4
P61221	ABCE1_HUMAN	ATP-binding cassette sub-family E member 1	ABCE1	60	130391	175748	128856	68313.3	83032.1	97262.7	86797.9	90753.1	68158.9	69412.4	13252.6	74595.2	147887	69229.2	64736.8	63756.7	69398.6	76538.5	79111	72946.4	86959.5	53220.5	86023.6	113783	103320	120908	42403.3	42691.7	238093	24813.6	37894.1	32861.1	84721.5	48710	44017.3	46196.4	60161	59204.7	57473	48670	51798.2	53126.2	50548.2	56772	52592
O95466	FMNL1_HUMAN	Formin-like protein 1	FMNL1	44	824.913	2640.41	1324.97	1051.63	1684.89	1550.79	39763.2	34077	12986.4	30776.6	1024.7	20090.6	27000.5	29703.4	32565.7	13217.5	9293.17	20749.4	10420.5	19725.8	25969.9	689.5	38726.1	3838.79	35828.7	8733.86	32410.2	20273.9	49692.2	1454.76	30745.8	26803.4	257.687	42669.4	35814	13431.9	29770.3	7529.31	14910	27668.6	18864.2	17317.9	18687	9930.01	27922.1
Q5BKT4	AG10A_HUMAN	Dol-P-Glc:Glc(2)Man(9)GlcNAc(2)-PP-Dol alpha-1,2-glucosyltransferase	ALG10	5																						1262.07					524.944						242.471
Q969P0	IGSF8_HUMAN	Immunoglobulin superfamily member 8	IGSF8	14	636.649	1876.95	1119.88	715.714	2119.79			482.396		408.199	373.113			200.59	1632.63			637.901	148.701								430.755	43.3413	963.379	1318.31			520.196			623.132			769.105	678.501	927.495	633.993	927.983	280.071
P20749	BCL3_HUMAN	B-cell lymphoma 3 protein	BCL3	5	1271.67	89.2635		416.522			953.342	4317.78	14901.9					3942.97			344.774						8487.34		7416.59	451.6								1210.8			220.542	243.355	2614.59				1959.13		2700.81
Q9P013	CWC15_HUMAN	Spliceosome-associated protein CWC15 homolog	CWC15	14	2145.16	1749.94	1829.09	478.868	1317.88	2256.15	13045.6	8393.76	5356.2	9064.15	640.926	6739.09	9544.32	9116.83	10541	12039.7	5922.2	5138.48	9034.19	7434.5	16249.1	2275.57	9328.69	8764.54	8621.66	8107.48	14231.9	15897.5	14483.3	11136.2	30721.6	9346.01	1449.6	17990.5	15145.5	13086.2	8609.98	8204.65	12789.3	4953.93	5659.64	3679.44	4492.21	6709.46	7630.74
Q9BRP8	PYM1_HUMAN	Partner of Y14 and mago	PYM1	15	41714	35331.1	46521.7	32207.4	1084.86	43842.2	8911.35	9237.84	10200.7	7125.71	21729.5	7307.17	10975.7	9996.73	12143.2	6245.44	5002.21	4829.67	3337.21	5148.47	33070.2	21286.2	26434.1	5589.77	27219.2	35401	15670.1	16046.6	22730.1	12960.2	17152.2	17244.2	20312.8	17148.3	15031.3	11043.7	54118.7	54219.6	60438.6	69785.9	69718.4	71802.1	49074.9	52078	55177.1
Q13356	PPIL2_HUMAN	RING-type E3 ubiquitin-protein ligase PPIL2	PPIL2	27	8473.95	7563.33	12934.7	19079.2	3096.09	3096.49	2623.86	5275.53	1690.95	5167.56	1345.91	3787.26	2311.92	1743.27	2334.74	2296.12	12221.9	3637	3388.76	2084.45	4619.74		6724.67	6674.41	4997.05	4662.74	2985.76	2192.44	12875	5411	1439.12	1910.58	24128.6	4351.7	3664.68	2669.82	3942.61	4839.01	4869.64	4924.02	8990.5	3084.07	3503.43	15915.9	5077.8
Q15070	OXA1L_HUMAN	Mitochondrial inner membrane protein OXA1L	OXA1L	17	7808.92	5628.92	28216.2	7325.88	32049	7130.16	6094.42	5047.32	9052.91	6291.2	5509.19	4278.67	6228.76	4334.44	5129.84	5670.87	4462.46	11409.1	4755.97	3563.53	5149.79	3380.22	5843.43	6608.84	7658.61	6991.86	10448.9	8348.96	10042.5	6293.01	6407.16	5511.36	3268.48	6467.9	8018.52	8105.77	24352.4	26197.4	13869.9	32454.9	13839.6	36619.3	11197.7	10920.2	9204.08
Q96KP1	EXOC2_HUMAN	Exocyst complex component 2	EXOC2	43	8798.92	6938.5	12604.6	7793.83	9175.27	2808.84	1005.19	10414.8	4818.91	3231.82	1115.46	7443.34	26067.3	4169.91	25067.7	8502.45	8385.43	1916.34	5218.71	6486.3	3594.16	416.656	4190.91	2889.24	8641.9	5096.21	40663.7	21215.4	44224.7	84616.6		2308.43	253.95	9845.01	3525	4863.51	3922.48	4466.01	21960.3	6662.96	1409.98	2248.08	3817.77	4953.4	4202.58
Q8NB78	KDM1B_HUMAN	Lysine-specific histone demethylase 1B	KDM1B	26	9644.71	4844.1	3074.2	3063.79	2332.47	2397.8	1599.27	999.305	9476.04	758.764		1361.5	2158.78	5803.43	4772.39	639.505	3457.07	1649.59	46815.4	10266	2363.99	1219.12	20265.2	62945.6	1040.84	13090.1	14884.2	31015	1584.84	327.169		313.959		10813.1	40847.7	36503.8	71463.8	38812.3	379.603	827.582	608.428	348.243	58149.2	42153.9	326.433
Q9NPJ8	NXT2_HUMAN	NTF2-related export protein 2	NXT2	5	550.968	441.162	917.009	1402.63	1358.43	1372.95	1374.54	1536.68			1061.73	139.551	1388.66		1390.78	226.212	1095.73			1640.64	1252.92	1252.32	2009.46	1064.21	1101.62	1313.24	1643.27	2019.38	1708.45	2691.75	2680.48	3105.51		4206.53	3162.72	2513.54			2687.35	2142.21	1911.72	2113.41	1570.14	1729.51	1689.86
P54252	ATX3_HUMAN	Ataxin-3	ATXN3	9	8063.73	1179.21	7345.4	805.885	3185.52	2407.77	974.177	1909.97	1332.27	2824.5	4326.91	1204.77	4287.61	907.936	822.953	1298.36	287.271	3474.6	1766.08	730.435	9905.01	2718.4	10002.5	124133	1430.87	126971	65687.1	2114.18	51185.3	75754.1	90221.7	13031.5	1834.3	26928.4	15612.2	81226.7	129577	129089	17498.7	1353.63	22823.6	1247.17	16913.6	1081.46	169.515
Q9NP97	DLRB1_HUMAN	Dynein light chain roadblock-type 1	DYNLRB1	12	47825.3	49085.3	48339.4	33790.4	12938.3	16903.1	24933.9	20070.7	16003.1	17662.9		15204	17628.2	20839.1	16102.2	16158.3	23208.7	18711.3	24909	27729.7	25992.7	6736.77	19096.1	25110.2	18499.5	26041.6	24100.4	18399.7	24269.3	22485.9	13884.3	16732.4	11247.6	36232.2	22058.9	20226.9	11556.1	24296.9	6288.95	15451.1	12862.5	45295.6	9926.66	11490	9374.12
Q9BSW2	EFC4B_HUMAN	EF-hand calcium-binding domain-containing protein 4B	CRACR2A	7	1467.82		1042	743.33					315.133	796.952					72.8353		2853.89						383.12					615.003		496.535	489.254				579.096	446.514		729.991	1366.03	203.08	121.054
Q86YD1	PTOV1_HUMAN	Prostate tumor-overexpressed gene 1 protein	PTOV1	7				243.792							636.142			475.053				240.236	280.71		168.432		642.883		259.688	4530.08		853.745	829.971	116.292		104.042		106.769	107.648		479.893	1467.08		404.868	423.438		248.437	2328.26	135.739
Q13445	TMED1_HUMAN	Transmembrane emp24 domain-containing protein 1	TMED1	7	15987.6	13443.5	18501.4	12524	7468.29	5944.38	6053.19	6500.46	8288.52	5346.37	4177.95	5752.82	4497.93	6016.58	4548.1	5866.04	7548.15	7828.01	8295.6	8209.83	11071.2	1659.23	8365.23	11904.5	11540.7	10735.3	12511.7	12208.2	12409.1	8038.58	11832.8	10776.7	2256.12	7753.73	14017	13971.8	40970.2	33502.2	30862.6	24833.4	22490.2	19006	21978.8	24455	23224.5
Q49AG3	ZBED5_HUMAN	Zinc finger BED domain-containing protein 5	ZBED5	13	13883	1295.64	961.319				330.547	13950.2	14763.1	25305	1270.74	566.021	12938	3928.1	390.399	125.028	7246.81	755.648	4038.97	4358.11	5921		676.018		714.131	407.954	10799.4	2399.54	823.683	4156.39		709.946	1061.48		1005	1183.42						3875.6	3460.76
A7E2V4	ZSWM8_HUMAN	Zinc finger SWIM domain-containing protein 8	ZSWIM8	31	958.74	844.278	1236.86		10615.4	2864.97	52174.3	106.714	51023.6	7820.94	656.977	3398.43	7760.16	5119.32	1164.72	230.143	100.347	29915.6	6952.24	2037.48	3834.02	11222.2	440.612	807.308	1415.37	1225.59	876.197	551.022	40706.5	1179.35	3355.36	1325.71	453.16	15650.5	1611.89	1567.58	2856.07	2963.31	1950.46	1217.71	1238.95	249.994	7347.34	1911.11	3154.44
Q15018	ABRX2_HUMAN	BRISC complex subunit Abraxas 2	ABRAXAS2	19	8982.37	5141.4	5593.83	35936.8	20303.1	10570.9	17104.1	63395.6	83715.4	60684.8	9563.13	20416.7	77406.9	19487.5	46583.8	21224.1	11552.3	17611.8	73021	14046.2	95304	6004.28	94185.1	22901.1	12985.4	19340.5	96668.9	36007.1	18223.1	11602.2	109910	110128	8937.18	116270	12439.4	15729.3	5166.09	8164.52	71302.5	12129.7	2600.48	14896.6	9215.25	10468.1	5478.88
Q9UFH2	DYH17_HUMAN	Dynein heavy chain 17, axonemal	DNAH17	6	1031.56			472.168	1596.54	897.091	282.873					528.31								396.165	131.727		555.975	46866	1944.64	636.119	215.363	122.807	57162.1					1470.95		648.137	1717.71	4405.91		2342.93				1679.83
Q00403	TF2B_HUMAN	Transcription initiation factor IIB	GTF2B	25	18860	19357.5	21106.2	1503.06	142.748	12127.5	909.895	3288.88	4482.26	845.764	1114.15	2203.44	1615.62	1234.34	1967.21	4520.36	2490.97	1566.91	6333.58	7182.86	3647.54	895.76	7428.06	5042.26	5702.85	2900.3	736.473	577.892	829.791	838.221	7108.2	722.786	455.916	377.641	1790.25		5183.43	4163.34	6324.57	3932.81	5041.67	5582.65	4924.59	3179.82	3394.2
O75663	TIPRL_HUMAN	TIP41-like protein	TIPRL	16	43574.7	24087.3	37901	18446	13993.8	6461.8	6061.47	9482.78	4728.95	5129.23	3397.18	4653.46	4116.67	2699.59	3991.77	3063.72	13272	3462.12	13554.2	17749.9	21085.6	36573.9	22759.5	11151.6	22630.3	22252.6	22397.6	36135.4	32260.5	28909.9	33667.4	30136.4	39435.5	35206.8	41135.1	33561.6	8331.19	8168.28	12308.8	4782.8	4985.86	5729.17	3494.08	6977.41	5861.01
P05771	KPCB_HUMAN	Protein kinase C beta type	PRKCB	7	669.825	735.999	910.062	143.559			3083.05	3977.41	5203.07	4840.77		4787.91	4802.3	4535.74	4805.98	5015.65	1462.95	1568.12	2538.14	3681.28	3836.07	616.726	2921.65	2961.04	2890.62	3049.2	4701.95	5178.61	5214.17	4253.49	4034.55	4801.51	484.28	5552.82	6575.75	5563.78	5218.78	5723.07	7221.5	9027.13	7163.36	6852.87	5487.81	6139.33	5827.33
Q9NZV5	SELN_HUMAN	Selenoprotein N	SELENON	6					827.36			42675.1			2320.97		3027.3	6940.58				353.567		912.132			94.7354		19134.4				1304.77	9240.83		1049.59					70.616						2645.58
Q9NY61	AATF_HUMAN	Protein AATF	AATF	29	4322.45	6870.57	13346.3	835.51	406.779	926.956	5667.95	6659.96	3902.99	2501.66		4878.79	6108.69	9358.33	7051.62	41105.3	3510.12	7086.8	3263.74	7084.95	3375.12	543.991	17997	8770.07	10263.9	12976.8	18575.4	2275.38	3523.94		1749.95	2087.82	2284.09	25944	74861.8	32665.2	8976.93	10028	9798.17	14632.4	54984.7	9790.35	11077.4	10415.1	11400.3
P07311	ACYP1_HUMAN	Acylphosphatase-1	ACYP1	9	511.008	684.424	3359.19	1142.93	511.374	732.861	11063.6	8623.96	6087.98	6492.33	2158.2	6127.34	8235.04	10786.3	11566.5	11981.9	9985.74	8344.68	7451.48	8735.86	10000.7	4816.48	10714.1	8972.72	5802.84	6495.55	7930.18	7876.24	7290.65	5344.29	5085.32	3809.09	4797.95	8424.38	10815.2	6589.01	5068.53	3128.81	940.358	1217.23	957.36	403.116	2871.18	2063.97	2187.15
Q86Z20	CC125_HUMAN	Coiled-coil domain-containing protein 125	CCDC125	6			1589.52			717.546				1065.54								1021.46												447.741	653.577		262.507			5139.49	286.062	237.352		574.785	2791.87
Q8IZV5	RDH10_HUMAN	Retinol dehydrogenase 10	RDH10	17	2437.22	998.891	1646.89	1609.54	1149.96	3127.42	8851.65	12115.3	11862.5	22055.7	681.611	11361.6	19103.6	22803.9	21922	18987.8	14148.1	15954.1	9859.33	9978.39	3685.88		14616.7	3802.71	4056.59	29209	936.094	402.902	848.536	372.457		333.542	670.335	1839.02	175.255		3076.27	1335.31	92.1697		290.719	4884.6			410.493
P41091	IF2G_HUMAN	Eukaryotic translation initiation factor 2 subunit 3	EIF2S3	62	165921	168878	200458	129172	87760.8	124704	162526	369176	345481	211987	39960.7	124071	135191	76753.5	77630.8	75156.2	163864	389704	159630	172563	200832	45851.7	177979	175671	188511	155282	324144	82971.6	80985.5	93782.9	136146	162221	62334.8	147826	63488.7	61796.4	138641	134058	152659	119906	133999	126837	116527	137033	123971
P54687	BCAT1_HUMAN	Branched-chain-amino-acid aminotransferase, cytosolic	BCAT1	4	755.631		10670.6		79.9246		1785.31	2008.58	211892	352.531		1212.1	209177	1278.63	2035.08	1431.6	283.978	444.14		953.856	1655.47		1567.09	904.825	779.989	906.924							3325.77				1043.3	4602.94	2709.29					1543.89	6601.22
Q13127	REST_HUMAN	RE1-silencing transcription factor	REST	13	5077.79	19093.2	7347.71	8034.61	2410.02	1885.41	12987.5	12344.7	10830.8	11521.3	14771.4	13084.4	18240.1	16361.5	14396	12555.1	6944.37	10960.1	6696.14	7346.97	7045.53	18965.4	24655.8	9437.93	8482.57	6736.44	5112.83	4619.55	5124.39	4444.87	5616.24	5481.06	15723.2	8736.99	7406.71	6437.23	3410.98	1917.62	2942.72	1323.61	3280.31		9204.08	8737.11	1984.24
O15116	LSM1_HUMAN	U6 snRNA-associated Sm-like protein LSm1	LSM1	7	2064.15	1015.63	1229.75	578.634	631.692	510.781	2843.21	1367.72	483.035	3474.15		4206.77	644.762	1136.96			198.863		194.575	264.165	1722.97	1869.04		810.242	7083.97		1632.11	690.64	222.769	1811.21	1008.97	776.008	473.624	1440		3965.82	8220.34	8573.02	730.614	534.159	655.549	2700.93	487.105		1339.14
Q8WVC0	LEO1_HUMAN	RNA polymerase-associated protein LEO1	LEO1	13	9316.15	9860.63	17112.7	3748.68		2186.6	5174.47	1570.2	1754.76	3370.61	1613.2	942.118	539.178	24805.3	1581.14	2047.51	5603.83	3180.76			1909.1	7200.91	6458.09	2911.63	4803.57	3945.9	14765	8864.02	2446.06	2723.16			4476.7	716.014	3739.16	2450.38	4289.72	6158.81	6153.24	5737.64	6070.97	4346.46	5755.09	5741.49	4351.75
O95084	PRS23_HUMAN	Serine protease 23	PRSS23	11	3386.07	671.633	2329.54		1063.74	1285.69				699.922	753.678	602.517				111.834		15490.4	269.431	566.915	497.404				666.572		40296	157.828	362.336		9071.39	8171.74		1212.49	69353.6	886.499	1822.21	142.332	878.15		1100.47	1142.21	1641.06	870.545	1102.39
Q8IYT4	KATL2_HUMAN	Katanin p60 ATPase-containing subunit A-like 2	KATNAL2	6	45655.7	30468.4	28742.2	4091.97		6137.48	16201.1	11382.6	11741.5	25833.5		13727.6	465.392	570.689	5005.8	3791.43	19441.6	12048.7	12100	14657.2	16400	9652.1	16854.2	9721.01	615.137	11586.2	9958.39		10162.8				442.348			43846.8	14277.4	15845.8	16991.1	8293.67		8370.35	31651.3	13259.6	14263.5
P49207	RL34_HUMAN	60S ribosomal protein L34	RPL34	11	11781.3	14726.8	11577.1	14602.2	12146.5	14077	90649.2	99239.5	108164	111651	79449.2	100028	113479	68713.9	89418.4	129627	77926.5	87649.6	94226.6	78230.4	74261.5	43496.8	90682.9	83664.1	86510.9	84616.4	53219.8	119966	98501.6	126220	118007	121095	83453.2	112283	100501	111530	82535.2	88826.4	54567.8	19536.4	54445.6	71790.3	74249.8	78100.4	75350.7
Q5TC63	GRTP1_HUMAN	Growth hormone-regulated TBC protein 1	GRTP1	6					311.906											1801.08				764.169						226.121						1766.57							714.118		2233.33	554.49
A5PLN9	TPC13_HUMAN	Trafficking protein particle complex subunit 13	TRAPPC13	11	579.841	4030.62	576.915	2130.28	3122.76	4384.03		441.553	851.906	1038.04	680.894	2674.32		185.629	1000	2587.44		1063.37	547.86	1384.42	4351.93			14257.8	10009.7	628.762	13244.3	16606.4	1320.86	2346.91	2938.65	1287.9	1450.95	42894.2	1375.41	48922.2	1273.85	21111.9	721.873	1044.21	1154.5	4593.18	880.221
O43314	VIP2_HUMAN	Inositol hexakisphosphate and diphosphoinositol-pentakisphosphate kinase 2	PPIP5K2	45	8119.4	2423.59	2984.95	3449.97		16799	24458.9	3770.3	29088.8	912.696	5379.41	7058.86	23929.4	4106.38	4173.89	23248.3	2444.13	2481.34	2356.64	19314	22084.2		4125.92	19005.1	4235.71	20592.7	27661.5	3503.35	4423.69	127617	877.742	1696.38		3840.81	4185.47	62619.9	19765.1	25896.4	6510.75	60364.7	2446.64	9268.7	9729.1	27184.3	8878.57
Q8IWU2	LMTK2_HUMAN	Serine/threonine-protein kinase LMTK2	LMTK2	21	1505.78	1549.26	777.583	384.94	52.4946	21236.1	7151.41	3479.64	4728.36	2959.11		9333.04	18271.6	10070	781.837	5933.18		6622.74	5974.41	10701.4		3359.02		1217.82	7510.93	580.203	2446.59	60269.2	680.27	1223.47	357.266	4007.9	2519.9	3115.39	7407.81	1516.11				3592.11	547.336		324.447	323.367
Q9UHR5	S30BP_HUMAN	SAP30-binding protein	SAP30BP	15	1080.62	3700.57	3404.21	500.033	102.854	23237.3	2931.27	6767.19	6831.18	1835.46	748.107	1369.27	1874.55	413.87			2311.23	5092.66	2406.73	1570.14	6743.66		7507.88	7217.87	8007.5	7304.82		3710.32	821.159			2640.33			7710.75	4812.23	1265.89	11626.9	1043.38	10029.8	2002.82	1864.57	1127.91	3033.07	1495.48
Q9UK22	FBX2_HUMAN	F-box only protein 2	FBXO2	19	35190.5	13744.9	15121.1	5780.06	7311.12	5471.66	8900.94	5961.52	3920.12	3363.1	471.749	5102.03	2906.72	1465.74	5246.07	1157.48	1337.57	1715.33	1710.64	1524.64	3418.3		2001.22	2231.89	2536.24	3523.73	15488.2	5922.95	5242.16		4736.79	6675.55	654.424	2072.9	1651	4192.37	855.879	1784.24	1816	159.755	673.739	76810.4	2848.18	667.071	823.146
O76027	ANXA9_HUMAN	Annexin A9	ANXA9	17	3342.98	3099.37	2469.69	1594.22	563.657	319.751				9914.16			9362.56	9581.67	977.892		895.875	876.875	3664.29		6231.6		4029.22	11606.1	148.495	2579.51	1646.05	608.927		1174.01			9982.4	26089.6		2510.39	173.829	505.596	300.368	1219.62	3876.57	1592.02	318.617	9690.86	413.642
Q9UNA1	RHG26_HUMAN	Rho GTPase-activating protein 26	ARHGAP26	17		31721.6		335.355	262958	13929.3	9025.31	3079.56	1302.99	7544.44	3167.42	8298.69	1994.03				216.992	18748	1248.46	6546.31	4819.06		19958.8		10828.7	1766.5					2510.62	845.261	658.934	1716.86		624.93		7431.12	16312.1			6628.58	6228.3	613.278	1178.15
Q8IY63	AMOL1_HUMAN	Angiomotin-like protein 1	AMOTL1	27		4024.27		784.662	152.684		1092.99	5765.75	5354.04	6777.31	6429.91	9340.31	1452.32	7928.43	5454.64	17081.2	3677	664.765	2822.47	7890.45	13329		2488.68	3440.62	16857.5	7291.03	2291.94	117.59	139.888	338.07	341.322			5035.97	863.121	2175.61	2868	3776.65	607.162	730.761	1967.22	806.62		6143.11	1739.33
A6NHG4	DDTL_HUMAN	D-dopachrome decarboxylase-like protein	DDTL	27	15493.8	8559.05	12442	521.259	2197.78	3634.81	60129.3	30331.9	46339	47800.9	8346.29	62699.7	33240.8	35786.6	33776.4	32705	25257.4	65747.4	6049.19	5577.42	14163.8	15929.1	30533.5	28021.8	28374.1	29205.8	7016.75	12866.7	19658	10385.6	10049.2	7660.39	9991.2	15318	11015.6	17189.8	9785.18	4045.85	4781.72	1798.5	2104.46	3923.11	6636.73	5554.76	11808.7
Q13188	STK3_HUMAN	Serine/threonine-protein kinase 3	STK3	38	12585.1	9213.44	26251.9	66259	5461.38	10321.4	7020.61	4204.33	7837.05	1186.15	33397.9	1749.31	3675.27	161.457	226.742	1241.68	8262.09	10678.4	12698.2	609.739	23289.1	5095.62	16098.5	21291.2	8286.65	6184.69	5635.49	4162.22	14752.4		2070.27	3444.41	984.612	1351.91	16333.1	966.477	6077.91	7769.88	21960	10387.1	4275.21	3383.3	10028.1	7792.63	6546.33
P13645	K1C10_HUMAN	Keratin, type I cytoskeletal 10	KRT10	51	583999	609350	588153	495465	502894	529803	83776.1	92132.9	69720.2	83581.7	102966	88946.2	100323	168278	147231	135486	100337	119976	106733	141950	191879	81158.3	180342	171402	166336	181349	161694	162696	200729	70220	83736.3	93316.2	110927	195909	230885	190422	275844	286631	315178	166080	197237	173877	254206	281860	256983
Q9UHB6	LIMA1_HUMAN	LIM domain and actin-binding protein 1	LIMA1	59	91529.1	120851	106305	89568.9	91672.3	95354.4	70022.6	91068.5	89790.7	67764.5	109881	61532.4	79680.1	52266.1	82265.2	89711.6	90354.4	76538.3	82825.8	90414.6	87502.7	162332	82158.2	110995	109314	105943	198748	166300	189903	193049	197569	184783	114243	174088	188549	183188	192100	207743	199481	219906	224069	240156	150525	189628	165573
Q9BY49	PECR_HUMAN	Peroxisomal trans-2-enoyl-CoA reductase	PECR	10	4334.55	2275.3	5600.61	7723.17	1633.17		755.765	110.735	701.693		107.011		638.929			537.197	169.029				853.697	2778.9		2791.85	2097.54	7266.16	1100.03	2863.5	2485.59	1407.6	1366.13	1647.66			1314.45	750.095						1124.76
B5ME19	EIFCL_HUMAN	Eukaryotic translation initiation factor 3 subunit C-like protein	EIF3CL	76	93776.4	119953	96914	84887.3	44714.9	89780.5	77391.2	102838	141967	76419.9	39034.3	72921.4	66205.4	67972.1	84987.9	71938.6	86629.8	89892.3	83165.6	107813	124383	30785	133495	119288	109156	121133	86684.2	98784.7	69718.9	38327.8	42585.1	33019.2	35620.4	58010.3	91402.3	78901.3	66871	65051.6	66320	54612.4	49850.1	58888.9	73262.2	64656.1	49177
Q9Y2F5	ICE1_HUMAN	Little elongation complex subunit 1	ICE1	40	707.928	708.2	2388.57	1913.75	343.251	1015.75		1809.18	2100.96	113.541	585.466	2614.74	1170.01	1640.38	1493.73	22515.7	436.646	1062.6	1691.45	1498.82	4090.99	1916.69		2158.59	2101.23	7307.8	1177.27	411.372	2591.59	1189.69	6109.66	734.812	1250.9	8943.76	3170.71	9616.54	4785.16	2155.97	1911.87	3436.93	3186.73	7583.71	7096.74	2118.53	2836.74
Q8IZQ5	SELH_HUMAN	Selenoprotein H	SELENOH	7	369.018	671.945	230.434	1925.85	1872.28	229.836	478.002	1567.29	1564.4	1235.04	727.149	975.441	310.55	171.991		662.388	1377.44	1641.34	1571.81	1198.46	967.503		1013.37	1764.93	1590.52	1589.17	1097.69	1256.38	1836.89	271.507	454.247	350.555		822.342	671.076	857.66	1895.64	2202.39	3019	1991.08	1418.33	923.712	1988.72	750.156	958.73
Q9BZE1	RM37_HUMAN	39S ribosomal protein L37, mitochondrial	MRPL37	41	24775.3	33030.8	20418.9	29732.1	33575.4	30467.7	11365.9	15096	12105.1	15190.7	6042.99	10783.8	14157	8669.74	10926.4	11350.9	15288.1	14762.2	12437.7	14486.5	5001.54	226.706	35680.3	13701	13660.7	17253.9	14026.4	7161.41	8970.23	4817.34	5069.33	6505.7	3049.94	8332.28	10804.4	10137.2	10939.6	23554.9	16586.6	18784.8	32180.1	20448.4	13219.6	16355.5	16430.8
Q9BUH8	BEGIN_HUMAN	Brain-enriched guanylate kinase-associated protein	BEGAIN	15	2627.93	1773.28	52325.1		1607.2	243.017	87.885			4323.68	9428.52			19427.1	5129.94	5270.07	4416.45	1407.78	2793.92	3919.22	4170.35	5602.6			2087.84	409.711	82091.5	1265.9	87497.2	2319.15	1009.74	1743.78		1083.05		4786.1		832.825				7954.95	119.822	244.829	187.551
O60942	MCE1_HUMAN	mRNA-capping enzyme	RNGTT	22	2136.32	24956.5	79567.7	2932.77	2514.81	4197.87	6826.91	6198.44	2570.65	9701.09	11666.6	8329.46	5403.38	2063.5	5102.16	5606.57	4086.19	4936.96	2383.8	2187.43	2842.01	2717.9	7540.94	5372.03	6908.11	19001.8	20001.3	1079.31	8925.45	1466.7	1351.29	739.477	2853.3	870.746	7343.9	10581.8	5438.17	5209.91	8066.68	7040.15	5202.39	5739	8877.18	6430.16	2967.68
P62899	RL31_HUMAN	60S ribosomal protein L31	RPL31	15	26353.9	18794.9	9943.23	52395	33646.8	33389.8	94916	119285	129184	136270	83969	139957	122316	121365	116157	149036	95351	108405	103953	100658	98341	85289.2	112681	94390.6	96340.9	23319.1	132503	130749	101760	141704	132144	85673.9	15537.2	101435	183566	115425	103612	92737.7	91497	64118.2	65527.1	70179.9	83051.7	82417.6	79594.6
Q96LA8	ANM6_HUMAN	Protein arginine N-methyltransferase 6	PRMT6	6	3746.49	184475	1083.82					360.685	165.803		5457.11			544.862				768.655	736.973	694.964		519.852	709.655			909.741			115.878					141.18		898.521	967.287		259.093	131.509
P62942	FKB1A_HUMAN	Peptidyl-prolyl cis-trans isomerase FKBP1A	FKBP1A	11	60304.5	17878.8	18907.6	30382.1	39800.7	22546	68626.7	42135.4	36898.7	14398.9	204.566	48989	128062	97842.7	78357.1	70839.3	187849	82843.6	36601	46463.7	91040.9	27529.2	17143.2	310104	302919	268648	292687	55353	56021.9	42307.5	31716	33708.3	13982.4	37289.8	57736.6	56287.5	5068.41	209556	18475.9	29670.9	10357.6	8295.22	12784.5	13103.4	10388.3
Q86X27	RGPS2_HUMAN	Ras-specific guanine nucleotide-releasing factor RalGPS2	RALGPS2	15	1864.72	1175.76	5439.01	1853.3	2377.76	3689.23	343.691	2507.79		13370.7	3931.07	5683.61	163.885	3790.82	7440.61	17627.2	1865.04	13737.7	20230.4		53142.9	1614.57	61.2029	702.542	34051.2		1915.73	1326.84	17097.1	4250.42	4226.61	1578.13	2393.92	5010.2	16902.4	2715.57	4356.21	2153.74	2665.48	12202.3	5133.58	7521.22	1866.42	4643.62	2431.19
P26440	IVD_HUMAN	Isovaleryl-CoA dehydrogenase, mitochondrial	IVD	28	86976.4	71792	77166.4	168042	25936.1	22826.1	14266.9	33899.7	2020.12	485.694	16536.3	2428.03	18916.2	6362.27	16731.6	15127	70396.7	10600.7	26618.3	5560.39	6760.42	36272.7	1583.94	45713.3	3156.94	2739.81	10724.7	27864.7	50783.9	7159.97	8438.57	6095.15	12509	13348.1	47421.6	44911.5	13198.7	13180.3	18277	11737.8	11607.2	12826.1	10293.3	10093.7	49696.6
P29692	EF1D_HUMAN	Elongation factor 1-delta	EEF1D	42	398859	434770	440175	234239	218734	271990	264037	233677	220172	222671	125328	168362	219927	165848	190276	170608	189420	205882	185115	261398	254480	144722	241683	207153	225449	216505	238976	289550	264667	93897	94686.5	116399	100850	191695	251126	234058	154951	170652	203343	122431	130601	144660	138496	148451	154331
Q8NG27	PJA1_HUMAN	E3 ubiquitin-protein ligase Praja-1	PJA1	6						1836.74		1526.97	187.601	705.132		570.783			209.691		202.439						1119.49	683.62					1926.9		149.338						105.154	276.667
P01137	TGFB1_HUMAN	Transforming growth factor beta-1 proprotein	TGFB1	8	7498.9	4021.33	5017.45	4881.25	5390.64	5754.97	1485.66		5094.05									155.604		1527.58	550.653	1482.55	1691.89	493.034		471.838	173.563	597.58	156.129					303.409	118.413	168.174	2167.17	1506.95	218.774	505.223	362.919	445.014		920.105
Q9BW85	YJU2_HUMAN	Splicing factor YJU2	YJU2	24	464.771		2329.78	9041.57		189.584	7925.74	4094.56	2761.67	2405.88	745.359	2892	6258.29	949.573	1344.15	1093.36	763.901	5018.73	3413.28	1831.88	4238.81		1911.3	19373.7	1758.92	12141.4	5468.4	1527.59	33292.6		6787.53	1140.3		1421.61	2026.74	1274.24	2216.26	2251.14	7346.77	2371.66	1324.53	2283.95	3646.17	3222.05	8244.52
Q9NRP2	COXM2_HUMAN	COX assembly mitochondrial protein 2 homolog	CMC2	7	2517.63	2861.2		569.795		2720.36	2997.26	16728.3	18606.7	30752.5		515.495	3680.58	12285.9	2997.06	3055.69	3140.92	8708.45	5856.91	2800.86	348.694	113882	1436.81	212.662	446.03		1798.26	1801.46	1763.34	2797.03	2237.57	1930.69		1727.06	899.151		838.299	1190.15		788.518	59.0677	574.544	151.372	1749.94
Q13489	BIRC3_HUMAN	Baculoviral IAP repeat-containing protein 3	BIRC3	13	810.439	731.463	753.251	3412.18			531.005	805.029	373.822	1724.11		796.748	1228.12	964.534	1079.96	199.059	801.771	616.193	32349.2	238.706	717.293		599.604	1427.24		709.472	24318.8	25301.1	774.842	354.838	770.978				20470.9	1636.2		240.907	1553.8		3609.47	4121.48	2809.54	2961.98
O95359	TACC2_HUMAN	Transforming acidic coiled-coil-containing protein 2	TACC2	71	19442.2	8965.4	23203.2	10142.2	1963.34	6922.97	13491.6	78963.7	30025	6689.76	219.558	11389.4	5347.08	8624.43	6055.68	19043.8	25526.5	6710.98	6162.85	6384.28	84095.3	1176	21945	42639.9	17058.5	46383.2	40177.9	223977	42160.5	6973.92	2277.23	16204.2	4915.3	4032.61	86496.5	44707.6	199001	3131.56	37537	2734.67	2755.59	10917	2217.33	26864.6	16472.9
Q9Y2D9	ZN652_HUMAN	Zinc finger protein 652	ZNF652	7	4683.23				1032.95	4051.58	599.144		1585.61	145.627			85.3831		147.117	2017.3		142.877	1687.93		2571.78		536.197	1169.8	588.922				942.731		2699.44							1979.42	2357.53			17209.2			1941.58
Q9Y2Y9	KLF13_HUMAN	Krueppel-like factor 13	KLF13	8			1453.79	826.097	1216.37	390.799	187.293	2494.74	81290.2	131.499						257.078	364.897	176.765	163.718	349.919	461.869	1102.77	387.769	485.637	555.386	680.233					977.083	1776					2281.8	1681.3	927.815	696.763	2511.71	1194.51	1139.94	3225.8	4380.28
Q8IUQ4	SIAH1_HUMAN	E3 ubiquitin-protein ligase SIAH1	SIAH1	5		1091.33		1942.88				91.7686							272.288	24355.5				364.593						1941.4	385.753		888.692							215.548			28095.1			10254.7		131.782	275.378
Q5SRE7	PHYD1_HUMAN	Phytanoyl-CoA dioxygenase domain-containing protein 1	PHYHD1	5		5462.07		307.438		21328		685.224	431.698																				214.223	178.844		796.16		552.739	444.767	651.178		112.717	292.699						200.609
P23219	PGH1_HUMAN	Prostaglandin G/H synthase 1	PTGS1	12			352.863			805.099	10711.9	12893.7	9301.51	11141.7		5543.14	9000.81	3555.93	7885.44	6409.69	6156.14	7824.8	6776.01	5890.23	6482.75		6782.89	7558.47	7070.98	7827.33	247.54													482.605
Q66LE6	2ABD_HUMAN	Serine/threonine-protein phosphatase 2A 55 kDa regulatory subunit B delta isoform	PPP2R2D	20	3123.26	4208.91	3969.69	1929.04	3528.08	4016	2629.68	3035.68	2211.08	1977.31	958.535	1589.69	9653.58	6687.71	1241.95	1082.49	1156.43	1505.48	2207.6	1556.61	9084.55	1660.75	1238.86	31660	2536.6	4133.1	3413	1328.42	1174.85	1831.04	2225.46	404.858	789.991	1564.33	592.644	3184.8	628.406	5243.41	526.862	3565.1	1472.32	3801.9	12521.9	507.217	868.101
Q9Y233	PDE10_HUMAN	cAMP and cAMP-inhibited cGMP 3,5-cyclic phosphodiesterase 10A	PDE10A	17		2239.25	1885.07	84.5239				1150.33		344.771	65527.2		3301.36	138.456		1883.78	30033.2	1647.5	4983.27				577.531			108.734		302.019	726.932			8235.67		1374.94						1963.56	1657.77	6746.18		9966.53	1142.25
Q9NVM4	ANM7_HUMAN	Protein arginine N-methyltransferase 7	PRMT7	13	922.965	416.351	89584.2	842.566	509.768	3566.95	1068.9	2004.07	1646.75	1441.5	20959.6	723.307	1111.67	700.518	894.848	416.479	2665.87	171443	761.01	946.126	2102.84		1751.82	2474.13	2036.73	1858.26	3842.35	4376.42	4526.94	4590.6	355.465	2317.5	109.998	57271.8	6677.71	2577.66	3255.19	1290.01	2760.03	6331.05	2490.62	4150.17	5160.1	2913.13	2142.2
Q6Y2X3	DJC14_HUMAN	DnaJ homolog subfamily C member 14	DNAJC14	13	1131.98	837.593	13509.7	83.4966	808.319	446.337	4636.21	513.234		976.678		461.76	3399.07	208.021	1776.72		326.954		156.565	4763.24	4751.74	3690.26	5211.84		2557.61	1605.51	3013.98	688.712	135.804	586.388	2739.77	613.919	2748.59	2836.88	4198	2221.26	3116.04	6832.43			580.318		3197.4		291.534
Q9H7Z3	NRDE2_HUMAN	Nuclear exosome regulator NRDE2	NRDE2	35	233.376	4159.76	93508.8	2565.94	1321.18		7725.8	14404.7	5462.74	756.955	759.598	13403.2	9264.83	1345.48	92.9138	17411.5	3808.71	3566.32	12571.7	1744.81	6268.08	1775.11	3303.25	6771.04	10402.2	29814.4	147.705	10979.1	3690.11	41564.8	2382.81	8798.34	1871.87	22302.6	15193.2	2528.65	6463.64	4791.61	5980.37	10580.4	2003.77	2407.42	6341.57	20458.1	7161.85
Q92973	TNPO1_HUMAN	Transportin-1	TNPO1	69	205773	192080	190992	60791.8	67148.7	59742.4	116535	108379	103208	109156	32594.7	75544.2	123755	92743.1	108142	148626	81563.7	89163.5	85974.4	97140.8	192935	32853.7	97497.6	103027	121106	135991	92700.8	146046	123476	80895.9	77704.6	53363	31881.8	170283	135922	122470	179524	61172.8	202853	58435	346107	123603	111190	86019.3	159817
Q9BRD0	BUD13_HUMAN	BUD13 homolog	BUD13	20			10360.4	9653.86	9289.3	6640.94	3482.18	19214	16880.5	4409.4		2686.8	5128.09	694.973	2707.66	1024.77	4922.67	2122.33	2012.95	2663.16	7592.77		5255.37	74383.7	91337.3	80659.9	9973.49	10575.2	5114.3	9239.5	9945.11	3000.53		2271.32	8424.36	7670.11	3494.66	9717.83	1969.21	17260.2	9869.25	5615.32	3793.45	3090.27	12224
O75420	GGYF1_HUMAN	GRB10-interacting GYF protein 1	GIGYF1	21		1408.15	1604.45	2217.25	198.437	830.727	4895.67		584.235	1176.78	959.296	971.552			304.483	20502.3	306.4			127.011	647.403		1189.58	164.369		7071.55	497.642			480.187	214.666			212.908	1446.81			521.525	2257		2509.85	2069.76	14684.2	186.05	1887.19
Q3KNT7	NSN5B_HUMAN	Putative NOL1/NOP2/Sun domain family member 5B	NSUN5P1	9	1639.75		288.225	3166.57	1223.4	2626.83	5242.13	2971.06	1840.3	3151.15	730.612	2940.31	3431.49	2345.01	2359.27	2709.68	315.32	4056.27	3351.95	3485.9	5470.57		3809.8	2094.74	1321.91		147.366				1700.36	1843.98	259.655	1348.68	1568.41			113.348		658.083	16781.3	14251.1	7912.29	4735.94
Q14493	SLBP_HUMAN	Histone RNA hairpin-binding protein	SLBP	3			8177.34		1085.62			324.477		59.737		6927.64	184.542	729.863	4564.22				2779.15		12209.5					384.796	1259.1	715.237									6226.64		359.117
Q9P244	LRFN1_HUMAN	Leucine-rich repeat and fibronectin type III domain-containing protein 1	LRFN1	15						2083.53					1332.08						1248.61					1388.83						2888.22				4041.15			763.615	585.615					762.749	326.731			199.234
Q96M89	CC138_HUMAN	Coiled-coil domain-containing protein 138	CCDC138	15		4276.89							2383.48	1094.56	14811.3	952.325		2331.61	12622.8	2135.22		855.143	468.412		83.3321		3625.4	853.036		804.118	1516.64	1650.32	1566.88				210.905		4101.95	2908.95	4226.85	3213.15			1010.49	2208	466.829		400.256
Q15404	RSU1_HUMAN	Ras suppressor protein 1	RSU1	15	3324.83	5002.2	3216.04	2460.28	399.819	184.57	6911.38	1504.01	1031.54	23018.3	3304.08	11042.7	5042.34	7430.21	7826.2	9392.69	1487.69	19058.2	4383.59	4160.19	4260.54	2346.39	7350.19	5783.69	2487.32	7504.2	7715.42	6315.75	6247.05	1857.4	4870.67	21073.1		7274.44	3465.6	7718.46	5617	4521.02	4077.3	4466.47	5010.38	3575.69	567.586	3436.47	1846.47
Q86WC4	OSTM1_HUMAN	Osteopetrosis-associated transmembrane protein 1	OSTM1	5	5768.17	9473.5	11622.2	981.174		6809.31											401.682			521.844			586.95		260.6					252.371	407.548	348.166		808.729			508.125		1231.09		407.365		552.091	458.886
Q8IVM0	CCD50_HUMAN	Coiled-coil domain-containing protein 50	CCDC50	18	911.595	512.835	1976.73	903.889	1427.15	8545.18	5414.53	5575.7	13342.1	4809.21	56773.6	22767.1	6057.06	21122.8	21644.4	2890.07	2647.04	3167.08	1571.89	4321.44	3960.25	2332.31	2669.79	4473.85	3174.78	29019.2	6135.51	4312.61	10787.9	2832.1	6236.31	25660.1	3162.8	5556.3	4509.44	10643.3	2019.28	1160.38	2362.67	3658.35	1654.52	5150.95	7654.47	2082.64	8325.51
Q9Y5A9	YTHD2_HUMAN	YTH domain-containing family protein 2	YTHDF2	36	16049.3	20769.8	30710.8	6570.91	34806.5	4180.32	30087.3	33924.7	38283.4	26781.7	5298.15	42114.8	25978.7	25137.8	25181.2	23806.8	19813.3	27345.3	242556	24370.3	34674.9	5148.43	40115	25225.7	23885.9	40014.9	31769.7	35107.2	34028	20297.5	27968.8	28530.9	14458.7	27400.4	28908.3	30386.2	52826.9	23356.8	27360.2	18527	18902	17630.4	474088	20038.2	20622.5
Q7Z6E9	RBBP6_HUMAN	E3 ubiquitin-protein ligase RBBP6	RBBP6	51	19116.1	156105	53241.2	2230.7	172209	2671.67	178329	122941	38743.8	7994.14	555.978	82366.4	112403	8567.3	46651.9	63060.9	104608	125019	10122.4	19494.4	41157.5	6955.56	38227.7	171393	169423	24631.9	133548	24892	172714	4879.18	98533.3	9524.89	1607.38	36987.4	6801.6	113209	9487.72	137923	8913.17	6211.67	8580.91	137684	4568.17	125057	5603.66
P48739	PIPNB_HUMAN	Phosphatidylinositol transfer protein beta isoform	PITPNB	34	50858.1	22647.1	21331.6	6672.11	7971.17	2456.84	41394.9	37813.9	32102.4	36956.9	2030.82	32780.8	32409.3	20976.2	17350.7	23592.6	10462.4	25699.3	12508.6	10833.8	44024.7	20928.2	23277.9	18833.5	14116.8	36452.4	17932.4	19161.7	16836.7	15486.5	3466.46	6885.17	12956.2	13454.7	11793.2	11435.8	12327.4	17137.1	8982.23	9877.28	3682.94	12082.9	11028.1	7687.92	6261.56
P0CAP2	GRL1A_HUMAN	DNA-directed RNA polymerase II subunit GRINL1A	POLR2M	14	422.506	8233.82	9162.94	1604.68	1114.01		562.746		2366.93		246.798	2322.13		248.299			444.063	328.598	356.045	3852.93	4680.86	1248.11	422.322	5444.43		617.682	712.973	307.889	504.649	587.357	342.924			430.793	428.132	540.328	2381.51		1174.87	2523.35	328.016	1122.43	965.292	14864.6
Q9UNF0	PACN2_HUMAN	Protein kinase C and casein kinase substrate in neurons protein 2	PACSIN2	28	37320.7	57337.2	158395	6847.38	6540	10695.8	12035	16021	16436	15470.7	12699.1	16925	23928.3	22387	20135.7	24189.7	17830.3	14410.7	9852.39	14181.8	17733.9	19026.4	19938.1	13288.5	16021.3	16558	11697.8	14560.6	14606.5	10412.9	9703.9	9741.04	22320.8	9471.34	19902.1	12298.3	4912.05	6487.64	19846.3	4532.14	2892.18	15766.8	3753.99	7938.78	6011.07
P51817	PRKX_HUMAN	cAMP-dependent protein kinase catalytic subunit PRKX	PRKX	8	451.134	14965.5	342.771				506.367	652.738	9279.49	1186.77	344.631	325.136	380.12		551.119	764.029					474.46		1159.57	1054.17	1366.8	1274.39	898.119							3172.89	5466.65					35566.3			524.646
Q9BXV9	GON7_HUMAN	EKC/KEOPS complex subunit GON7	GON7	6	274.256		458.73	467.681			4660.65	4192.96	2811.37	5718.39		5227.2	2534.36	3438.06	6222.9	4847.44	5397.51	792.094	834.165	1504.28			319.555	2864.59	3193.97	1227.75	6066.2	6928.18	7902.13	6336.92	3935.05	4599.33		8769.34	8093.46	8980.58	1915.6	1852.2	1687.16	223.144		914.615	563.748	581.555	387.669
Q58EX2	SDK2_HUMAN	Protein sidekick-2	SDK2	3		10871.3		173.747			586.394							54.7613											192.77
Q96NB3	ZN830_HUMAN	Zinc finger protein 830	ZNF830	13							490.907	1990.36	181.929	1758.87		335.656	467.439	2274.32	331.373	349.071		1577.36	610.369		1472.55	201.48	185.742	2254.57		59.171	513.614	1114.5	658.65	633.057		17662.9		2704.71	2144.47	3102.63	3648.62	623.798	541.076	53.393	801.704	231.357	2534.3	136.504	870.283
Q9Y2K7	KDM2A_HUMAN	Lysine-specific demethylase 2A	KDM2A	43	9331.25	24577.8	30617.2			5689.09	18378.4	16795.7	10365.7	5923.93	7717.46	2803.3	3121.96	1701.22	1748.05	922.285	7850.16	2929.38	5201.25	14331.2	87076.4	2472.09	4255.74	4105.79	3659.45	6167.59	3085.19	90726	87663	85144.1	17299.2	6114.29	3010.57	84584.9	3661.91	95897.2	12808.3	52682.7	13309	40304	29431.8	53609	11570.1	17786.2	10350.3
Q9P2C4	TM181_HUMAN	Transmembrane protein 181	TMEM181	2	5122.16	5724.77	5803.53	574.738			288.601	387.026	157.301			330.196	363.472		155.942	283.888		138.386		284.696	180.869		129.404		321.432	361.841	516.664	498.679	601.694					154.395	362.729	4536.12	944.363	1003.86	54303.8	874.388	922.16	1022.09	699.101	1000.79	756.611
P30414	NKTR_HUMAN	NK-tumor recognition protein	NKTR	30	2313.33	1548.54	6089.64	306.77	423.604	4594.4	328.897	1326.8	7740.56	5070.57	2985.27	589.575			751.42	3735.04	21437.5	2721.27	286.57	2361.85	541.9		23011.2	1058.2	26461.8	2748.11	13865.1	13842.1	18351.5	2801.91	1934.66	2977.33	1935.87	891.521	2312.08	349.638	17426.2	17374.7	1496.87	20457.2	776.264	223.769	14692.2	111.832	13832
Q92989	CLP1_HUMAN	Polyribonucleotide 5-hydroxyl-kinase Clp1	CLP1	12		1587.19	4275.71		1966.29	1751.03	2376.11	2747.05	13536.7	7811.52	1984.52	9506.9	7153.11	2978.53	2703.17	1529.91	7413.88	3811.07	7781.92	5453.54	1324.22		5980.23	2419.51	4734.51	61767.3	1837.11	3502.16	9890.49					2001.84	11420.1	223.297	2765.17	3811.88	3496.36	1634.83	2530.5	2065.57	4497.08	18263.1	3779
Q86X55	CARM1_HUMAN	Histone-arginine methyltransferase CARM1	CARM1	28	15121.2	18935.4	17623.6	44870.4	7330.48	11629.7	30691.7	21098.1	14442.7	156376	2634.88	23675.1	16659.4	11820.8	47949.2	4918.2	13689.8	10691.1	21052.7	16516.7	17251.3	4336.83	11840.3	20712.1	114821	28794.9	8996.37	34062.2	16167.7	7263.45	40208.9	3877.2	2682.88	7786.8	6419.51	6358.24	12291.8	10206.7	8705.89	6574.6	16505.4	7126.66	9837.79	13634	13215.8
Q16877	F264_HUMAN	6-phosphofructo-2-kinase/fructose-2,6-bisphosphatase 4	PFKFB4	24	7552.6	10075.4	11599.7	15238.8	2812.63	2561.3	4769.34	8275.65	1323.19	2177.44	25330.2	2563.07	3928.51	2810.75	4365.97	3578.41	4988.32	14342.5	1097.04	10979.2	1205.76	3206.38	1655.58	1429.26	1003.93	16664.8	8904.08	8696.48	3045.6	3054.53	3078.74	3154.29	3198.74	4505.22	23528.2	2967.43	6761.33	13730.8	15430	10433.4	11034.5	9730.23	6584.53	11539.6	12268.4
Q9H254	SPTN4_HUMAN	Spectrin beta chain, non-erythrocytic 4	SPTBN4	13	68806.1	66780.2	946.458	1270.56	2113.57	1593.26	28852.1	34766.1	27795.8	23080.8	4489.21	25101.6	35466.2	21477.9	22197.7	22183	1384.41	1686.29	21819	3111.14	21932.4	3088.28	3201.16	18934	19700.5	3700.34	29097.4	23436.6	23901.8	11803.8	9716.32	13965.3	3876.89	19533.9	19911.5	24214.2	1689.98	4832.33	2743.07	672.697	1008.64	977.941	1331.91	1532.78	1874.67
Q9Y4E5	ZN451_HUMAN	E3 SUMO-protein ligase ZNF451	ZNF451	24	1742.1	1347.17	7422.95	1362.11	4636.14	1331.98	2884.59	11661.3	4373.1	803.449	125.988	14635.8	2126.24	5596.14	3124.67	4103.71	2291.68	2359.57	8272.86	13838.8	5701.41		2642.59	11072.3	2681.16	2333.27		1238.18	1237.22		268.29	16980.4	3311.73		733.315	348.091		4778.36	3179.38	3694.23		3042.74	9915.68	301.945	875.006
P30405	PPIF_HUMAN	Peptidyl-prolyl cis-trans isomerase F, mitochondrial	PPIF	30	143973	141954	147013	6838.15	11290.7	8484.3	38258.2	62799.9	23606.4	12988.4	10825.6	41128.6	22673.8	20433.5	12685.4	16684.8	25670.2	25601.1	12396.5	8817.05	35891.7	15978.7	35559.2	33273.1	25567.7	30828.5	14427	27947.8	14695.2	20806.9	14950.8	25994.9	27289.8	6974.87	21666.8	5891.14	12878.7	8987.92	43016.2	25440.3	28184.5	6345.47	9540.05	34040.9	35174.7
P43304	GPDM_HUMAN	Glycerol-3-phosphate dehydrogenase, mitochondrial	GPD2	61	14966.6	22284.8	9509.22	18200.2	14423.6	24989	62803.8	46165.8	50161.7	37109.2	11607.1	39680.7	48335.7	24953	46321.2	30961.8	43146.6	37035.1	45244.5	56560	53087.1	7801.35	128500	55436.5	58853.2	57856.4	17455.5	17524.3	25695.5	18207.9	18791.9	21120.3	5504.17	14083.6	14116.5	21472.4	64585.8	44691.6	47928.1	33893.8	36356.1	50619.9	29910.1	46187.4	19986.1
Q9UFC0	LRWD1_HUMAN	Leucine-rich repeat and WD repeat-containing protein 1	LRWD1	29	4869.21	2281.34	3248.05	4692.32	2291.43	498.221	4510.25	7671.49	2263.15	2550.62	2896	3022.56	8947.53	1909.8	3166.56	4591.73	2773.01	1936.72	4281.23	9931.59	6485.28		4149.49	2456.42	3209.17	5633.71	708.85	1076.68	2920.81	5202.15		894.151		3588.07	4547.25	3748.86	1709.67	1230.62	1341.86	24160.8	3033.24	6798.42	15771.9	4786.9	5536.39
Q9BXK1	KLF16_HUMAN	Krueppel-like factor 16	KLF16	9	523.993	2084.62					149.367	1483.2	802.245			349.42	593.96	491.27	862.358	412.084	261.319	581.682	482.091		692.841		1140.94	934.447	1683.29	1242.06	377.143	727.351		71.9209		397.061		602.451	494.714	718.984	966.591			419.973	241.593	867.548	579.637	417.119	586.788
P11279	LAMP1_HUMAN	Lysosome-associated membrane glycoprotein 1	LAMP1	11	91959.4	103583	87146.5	123994	152280	159728	24228.1	41052.3	34011	28802.3	91009.9	40467.4	40505.7	33622.7	30873.5	44989.9	17103.4	30965	5841.72	34231.6	12949.4	93939.9	15090.9	23047.6	35352.5	11837.2	24905	33145.7	46718.5	28157.2	6464.48	29923.8	95185.3	16857.7	20159.5	7011.09	34357.6	9495.86	45530.2	52800.5	49091.5	28010.5	34700.4	37572.7	33538.7
P37837	TALDO_HUMAN	Transaldolase	TALDO1	45	17510.4	21772.1	24691.2	35406.6	18331.9	21264.2	89484.7	97697.6	128168	85359.9	62924.3	112273	273178	120421	131190	114878	48350.9	62245.7	69184.2	71042.2	69512.6	128360	63295	73082.4	116854	96050	194075	130645	161817	119571	120164	112463	43352.4	192806	204926	153638	68022.9	58618.8	70372.2	72223.7	53871.3	51856.3	49378.2	47068.8	49814
Q9NNX1	TUFT1_HUMAN	Tuftelin	TUFT1	17	3789.76	8815.29	6199.29	8425.83	5435.84	4555.22	4623.2	2733.01	14675	6304.65	5042.86	1186.65	7271.65	6823.27	2119.01	4719.16	5027.11	4468.07	3061.64	3740.54	6844.43	6333.66	4875.1	5146.1	5981.09	9859.3	11844.9	287.879	1117.8	279.786	205.598		7159.11	440.725	2137.65	3023.92	2472.35	2870.6	1630.49	6379.9	5922	4833.64	3367.34	2827.99	202.621
Q92622	RUBIC_HUMAN	Run domain Beclin-1-interacting and cysteine-rich domain-containing protein	RUBCN	13	24455.2		1331.23	21402.9	112.934		174.945				112.398		2194.89	28.5243	179.764					1688.62		1102.77			1506.83	1903.96	5454.85	18069.1			1367.61		788.782		463.488	4736.97	3801.12	2051.64	2151.7	923.974		967.829			2464.27
O60884	DNJA2_HUMAN	DnaJ homolog subfamily A member 2	DNAJA2	35	97741.4	128576	87862.2	85989.5	97890.2	108320	52997.7	52979.8	53874.6	48553.4	76781.5	53281.2	82762.3	48241.7	53023.2	44192.6	56752.7	52172.9	51535.7	60123.3	79096.8	85350.6	62196.5	64165.3	66843.1	70276.6	47837.2	54832.7	52060.8	44880.4	48743.5	38599.9	84855.6	49232	51185.5	55776.6	60846.9	60179	66377.6	58281.6	59375.7	66467.9	54356.7	56532.7	52112.8
Q92626	PXDN_HUMAN	Peroxidasin homolog	PXDN	22	1984.52	1993.43			1308.21		5510.42	12570.3	7356.86	8415.76		10187.9	8070.76	8704.6	9429.18	6256.88	7932.06	4732.72	11211.7	6563.23	10107.2		11105.3	10292.5	9829.11	27867.3	6728.96	10069.3	6075.12	7137.46	2424.76	3524.8		13079.8	4755.95	5848	10889.5	9775.11	9527.33	7904.84	11895.1	11920.6	5714.03	7706.86	6127.72
Q9NR56	MBNL1_HUMAN	Muscleblind-like protein 1	MBNL1	24	18725.9	26834.8	27170.5	16304.3	14422.1	15608.1	30172.8	23178.5	28274.3	24528.8	5466.53	23708.1	16693.4	11666.6	15372.2	12294.2	23651	19802	15422	11782.7	14156.4	7520.43	12870	13730.6	19309.7	12667.5	8644.74	15210.1	18449.8	11681.6	13522.2	7662.45	7068.83	17188.2	18391.4	13437.3	13009.8	14402.6	18502.2	18760.5	20828.6	26933	15345.7	13744.7	17054.2
Q8WVV4	POF1B_HUMAN	Protein POF1B	POF1B	23	993.608	225460	207378	304072		219948	209372	3269.47	4041.1	117567	5491.15	116405	130302	128782	5095.08	130392	146788	141375	3860.49	159887	183.713	6518.67	205298		3396.96	234769	114.899	195041	223699		228822		1608.96	221153	225170	205608	198257	189968	626.191	997.961		258779	171113	442.776	299.225
Q15233	NONO_HUMAN	Non-POU domain-containing octamer-binding protein	NONO	83	259226	321667	590434	525601	98436.1	132784	243282	232994	197906	166952	42499.6	214590	162365	174112	224717	167029	227650	213382	250170	260600	255451	42917.8	250421	269703	271532	254051	184810	203787	208022	155139	152367	155999	42687.6	168165	175898	161410	272500	277555	339968	268324	459316	273662	258041	239884	258995
Q9H0U4	RAB1B_HUMAN	Ras-related protein Rab-1B	RAB1B	39	180488	427845	403465	22867.1	43889.7	22607.8	135594	90450.7	91946.9	114554	38783.5	123472	92429.7	93102.7	76957.9	106226	80975.9	74126.4	100685	142095	153816	41011.2	165946	121354	130176	156736	115914	81131.7	113483	66863.6	133982	157103	43910.5	82577.9	132014	170883	189905	177164	177400	136260	101274	103950	205473	181378	188221
Q8TET4	GANC_HUMAN	Neutral alpha-glucosidase C	GANC	12			202.43						365.139	657.305			720.773	9774.67		1812.64	225.713	461.795		130.944				295.408		1324.01	296.664	119.558	715.146	855.954	796.321		1517.6	929.323		453.833	3563.15			1288.79				1917.81
Q9UK41	VPS28_HUMAN	Vacuolar protein sorting-associated protein 28 homolog	VPS28	14	4682.02	23265.2	156566	1368.23	2145.19	179210	20230.2	15030.8	12104.7	46988.5	21634.4	4788.72	7419.54	12042.7	14238.9	6556.96	13069.2	4183.57	6819.99	5568.44	7852.97		53833.5	22117.8	5390.82	30143.4	4141.81	9108.38	3886.83	2565.52	5452.43	7002.48	2138.02	26651	24433.8	11298.6	6618.63	15918.2	14413.6	17201.3	15156.7	6167.53	3966.44	62201.9	3358.11
Q14690	RRP5_HUMAN	Protein RRP5 homolog	PDCD11	102	155373	70100.9	76152.4	13844.1	37147.6	57616.1	39225.3	37311.3	53837	32058.4	6301.14	37788.5	36806.1	22063.7	33247	54980.3	52092.9	34654	33848.7	33617.5	54485.6	11619.3	36814.7	56569.3	36826.3	72059.7	76620.8	17679.7	18390.8	16100.4	9209.23	12045.2	18267.3	15968.2	15676.7	77494.6	39875.9	57546.6	46428.2	31940.4	48245.6	34451.3	33393.9	43853.1	33091.5
P20929	NEBU_HUMAN	Nebulin	NEB	5								2927.49				251.446			1313.13					2496.96	2863.36		18009.4					175.511									3774.49	4059.97	5392.87	7679.56	7094.07	7178.96	3858.61	4557.96	5019.23
Q0P6H9	TMM62_HUMAN	Transmembrane protein 62	TMEM62	6	84.3858			4160.82	3802.65	1674.7				446.19				7264.97	463.968						400.081														20114.9										155.736
Q6ZTU2	E400N_HUMAN	Putative EP400-like protein	EP400P1	4							187.092		213.753	522.361		379.225	407.539	115.678	327.909			283.017		94.1661	211.159	61.5403	234.759	863.12				6741.52	328.467	6598.7	975.164	220.108		1284.48	222.308			3934.43	120.987	162.197	120.942	176.826	356.926		87.262
Q8N461	FXL16_HUMAN	F-box/LRR-repeat protein 16	FBXL16	5	11814.2					1534.87			891.842					33471.5	37113.6			26807.6			1366.87	38826	358.725		363.561										4685.3	18928.8		1832.03	2812.91	602.855		626.049
Q9UN81	LORF1_HUMAN	LINE-1 retrotransposable element ORF1 protein	L1RE1	10	2337.93	290.774	434.457	2561.78		1159.55	148.615	3088.59	83.2883	818.253	9171.68				4486.59				232.163	311.023	1031.14	672.576		223.178	2420.03		4383.57	4443.53		5792.97		272.65	1378.17		4718.32	5080.78	8025.36		7466.93		270.057	283.578	528.858	10597.9	371.816
Q96C00	ZBTB9_HUMAN	Zinc finger and BTB domain-containing protein 9	ZBTB9	5	2374.44	21136.4		244.133			3650.96	5806.81	3063.97	3142.43		2491.41	3124.42	2923.57	2073.53	3124.11	2747.42		885.053	4224.56	1003.21			1340.73	1307.8	1609.06	6675.46	6594.35	6262.37		2413.43	1297.84		3774.91		2821.84		559.445	296.221			4058.92		6369.39	756.946
Q7L5Y1	ENOF1_HUMAN	Mitochondrial enolase superfamily member 1	ENOSF1	28	7986.89	11391.2		1087.49	401.793	31053.4	5507.1	9836.3	7236.98	5037.62	26224	17578.6	9598.81	6658.53	8536.53	4934.71	4397.25	24430.8	7797.52	1359.53	3527.96	10591	6272.84	5783.44	12124.7	6984.14	130338	4408.56	3986.39	23258.2	1383.99	18004.1	33152.9	31057.4	2975.6		831.61	10762.3	13869.6	5950.44	58787	33781.5	1866.23	1099.42	451.198
Q99496	RING2_HUMAN	E3 ubiquitin-protein ligase RING2	RNF2	13	688.909	602.219		658.578	686.288	320.819	856.651	393.989	794.65	1864.59	404.364	803.352	257.577	1039.81	969.351	869.883	1841.22	1252.94	1075.66	401.204	1596.45	253.253	560.661	6946	439.56	781.581	689.213	1965.21	215.777	1301.31	2221.71	1371.82	247.211	589.527	996.361	1738.56	872.928	437.333	646.902	554.109	3253.07	1477.71	3123.67	5797.95	1646.39
Q96TA1	NIBA2_HUMAN	Protein Niban 2	NIBAN2	54	72102.7	67375.4	69606.3	139307	41062.1	41513.2	43563.5	41453.5	51018.5	45469.9	20837.2	54420.8	50642.1	47063.2	44971.1	46312.6	37378.3	40382.6	44721.4	37051.9	38078.8	76533.2	47327	58287.3	53961.1	48810.8	51603.9	51801	41873.8	16526.2	21413.8	19025.5	23390.4	23760.2	138434	21131.2	28571.2	24356.2	38678.3	17519.8	75691.7	39382.9	47941.8	24721.2	19567.3
O15054	KDM6B_HUMAN	Lysine-specific demethylase 6B	KDM6B	5												89.0777					233.298		328.561	72.0307			955.379		297.357			1447.58	539.231		4322.37													66.1745
Q96ND0	F210A_HUMAN	Protein FAM210A	FAM210A	5	2915.02	1391.4	3920.63	505.154	467.533	1615.28	184.171	239.294		129.039	1366.79	343.696				1079.57	796.747		261.745	381.167			399.08		978.253	730.413	1221.1	558.536	2558.12	482.001	89.769	1788.83	1256.68	3017.95			987.828	251.123	2247.25	2188.37	1763.69	663.505	1401.06	1617.31	767.447
Q08174	PCDH1_HUMAN	Protocadherin-1	PCDH1	5												1120.38	5879.57	1314.71	1071.19												87.8733							787.673			135.408		73.6865	2651.11				198.639
Q13443	ADAM9_HUMAN	Disintegrin and metalloproteinase domain-containing protein 9	ADAM9	34	35385.9	32880.9	32106.3	35222.4	28534.2	28276.5	17238.2	20547.2	14506.2	15660.2	23697.6	11768.6	14406	17023.5	10651.7	10919.9	13796	15624.9	11639.7	16564.6	25358.7	21705.4	23719.4	18625.9	19982.4	23453.8	23453.5	21361.7	24733	29899.8	28260.3	22145.1	20413.6	17319.4	27618.6	24727	29234.7	26458.1	31110.5	21354	25772.6	26778.2	19216.6	21145.2	23329.2
Q9UHJ9	PGAP2_HUMAN	Post-GPI attachment to proteins factor 2	PGAP2	4		1286.29		652.815		207.719		1323.45												159.858				1056.55								633.069		1272.97	820.171		268.327			3770.16			478.383	1787.9
Q01581	HMCS1_HUMAN	Hydroxymethylglutaryl-CoA synthase, cytoplasmic	HMGCS1	34	8321.94		674.92	6556.2	14066.8	3795.44	187144	151830	160015	140496	8960.23	119006	127362	140355	138056	118814	73912.7	56946.6	33946	52937.8	68840.2	8332.3	62798.4	40206.4	60094.6	66030.8	158151	123729	175322	96353.6	96541.5	76339.9	21012.3	99208.8	122944	110484	68160.3	110247	65383.9	86603.1	53871.3	56376.6	53704.3	62675.2	38671.3
Q8IXQ3	CI040_HUMAN	Uncharacterized protein C9orf40	C9orf40	3	1809.52	863.316	935.025				2045.62	1423.04	1768.18	1302.53		2146.79	2175.37	2071.33	1597.14	2072.73	1470.87	1594.35	1116.68	1447.57	1426.27	4165.66	1201.83	1120.69	1499.87	1529.65	1394.77	1054.86	1050.08	1246.28	1815.11	2430.94	4158.48	259.856	1987.08	1325	607.216	2812.44	814.915	656.534	654.287	856.241	560.897	524.235	604.749
Q12980	NPRL3_HUMAN	GATOR complex protein NPRL3	NPRL3	15			3641.3			202.606	513.365	924.393	381.425			3713.69	6406.81	3552.45	342.572	8133.09		580.405		5897.63	613.4	280.188	9895.19	792.971			298.619		3887.02	9279.67	710.882				4546.55	28060.9	2822.13	198.998	1080.03	1618.44	759.678	518.566			155.528
O15231	ZN185_HUMAN	Zinc finger protein 185	ZNF185	9	6453.93	6739.7	10308.6	4582.53	4238.55	21983.6	11576.3	4102.24	11616.3	3083.86	13921.2	5048.4	7828.01	9762.84	7704.36	10615.4	5983.23	6977.24	11603.4	2133.92	3033.27	4899.54	2639.08	2310.02	3936.7	3825.44	4833.19	5223.22	5121.36	4070.01	3379.19	2953.31	5809.61	2849.55	8549.46	4240.46	20049	4599.91	15398.8	4888.88	11017.7	4864.15	16329.2	18723.1	2948.68
Q92665	RT31_HUMAN	28S ribosomal protein S31, mitochondrial	MRPS31	22	22985.9	20961.1	22697.7	14986.1	17353.3	15708.5	7284.67	8219.9	8579.01	9567.37	2549.07	6576.55	4426.41	3010.9	5102.77	2727.97	10167	3784.7	4737.86	3390.32	4640.47	1018.99	3482.04	3386.55	6031.27	5992.09	2446.72	2262.07	2600.28	12365.4	3087.2	4106.63	4247.89	3978.93	3785.31	3250.54	5529.57	4760.42	11210.7	20494.8	22171.5	24488.9	11746.8	16608.8	12765.5
O94910	AGRL1_HUMAN	Adhesion G protein-coupled receptor L1	ADGRL1	14							50635	1288.52			1365.57	156.267		505.752		843.014	334.672	32301.3		2617.8						1026.68	2506.65		2943.19			291.572			3301.23		7261.12	2562.47	2678.03	571.328				943.554
Q9NRL2	BAZ1A_HUMAN	Bromodomain adjacent to zinc finger domain protein 1A	BAZ1A	50	19858.9	15386.9	10807.6	47978.8	34589.6	31915.3	31787.7	26451.2	30403.5	24428.6	154063	25722.9	25926	28703.8	33041.6	30765.1	23390.4	31921.9	30191.2	26183	32350.8	106677	27842.3	29115.2	24151.6	21905.2	27091.6	23251	24189.7	32711.5	35794.3	52476.1	90138.6	54448.4	54298.3	50593	43139.1	41012.4	36247.2	37800.4	37460.5	39345.4	36098	43221.2	34592.5
Q6NW34	NEPRO_HUMAN	Nucleolus and neural progenitor protein	NEPRO	20	3690.19	8787.28	9582.8	205.232	1117.44	8171.35	3138.6	3684.29	3346.87	3004.87	228.042	8479.11	55804.3	8228.77	146482	7545.85	2417.49	603.319	2324.84	2284.03	173454		4224.97	1890.9	1961.6	1695.43	418.909	116534	433.442	507.94	622.389			3115.84	965.778	499.635	1435.39	1045.06	830.945	4212.17	944.077	609.547		3930.92	482.234
P17544	ATF7_HUMAN	Cyclic AMP-dependent transcription factor ATF-7	ATF7	13		928.788	640.966				770.9	1054.03	505.433	978.743		526.962	533.837	14812.5	1043.55		690.986	143.707	742.682	1635.18	860.795	748.306		637.592	1382.2	2818.1	1135.46	770.726	477.552					9123.99	601.171	4320.48	436.249	1513.65	134.649	4978.59	2003.52	4843.42	4131.21	1152.91	4216.52
Q15181	IPYR_HUMAN	Inorganic pyrophosphatase	PPA1	71	136163	139772	125635	12467.5	15432.5	14211.1	70445.2	40107	81660.2	38254.7	20829.8	48522.2	74665.6	30718.1	13966.8	10588.5	45902	46686.6	153880	35845.5	91845.1	127668	116910	29378.7	119834	165462	62837	187775	64555.5	41214.5	38667.3	33873.9	28524.8	125718	165882	127749	134249	137685	145348	106680	29199.2	50215	54273.6	91389.9	133374
Q8NC06	ACBD4_HUMAN	Acyl-CoA-binding domain-containing protein 4	ACBD4	10										136.168	120.718				485.965				1004.88	5759.25	883.086					139.488								481.648	508.219				409.183		2461.73				568.389
Q96GZ6	S41A3_HUMAN	Solute carrier family 41 member 3	SLC41A3	3	2630.78	2552.93	2129.19	198.211	686.673	439.017	89.1894	99.1299				67.209	50.3334		776.404	447.182							225.131		45.0458							81.9629		677.615			538.828				1182.63	137.777	488.299		530.322
Q96BD0	SO4A1_HUMAN	Solute carrier organic anion transporter family member 4A1	SLCO4A1	6					632.084	8302.86	911.078	15520.9	1070.81	1192.76	708.979	1526.92	568.958	1561.38	2526.53	255.183	5660.74	686.387	948.587	2260.03	2962.83	8950.49		339.603	1040.74		776.801	358.983	589.014	228.398	144.854			282.704	827.61	364.902	1562.27	8857.86	1192.67	836.75	453.749	1138.45	423.681		268.84
Q9Y657	SPIN1_HUMAN	Spindlin-1	SPIN1	16	238.53	1896.51	122.892	6174.81	2256.45	8272.11	6579.84	5158.95	25008.8	27786.9	2620.91	22896.2	6920.22	5041.94	7560.31	6203.54	23383.4	6023.57	7942.12	4465.13	11862.9		5929.13	7739.7	7780.13	25386.8	9098.08	6070.33	7137.77	13386.3	1646.29	1734.29	2641.16	3552.08	1281.89	6325.23	8882.11	4250.96	4271.58	1576.24	1057.2	1612.9	3221.25	3289.86	2631.54
P11117	PPAL_HUMAN	Lysosomal acid phosphatase	ACP2	18	12312.2	12352.3	14287.3	16032.8	11247.9	4673.32	1914.12	839.849	665.861	567.977	12300.5	455.312	10066.7	6301.51	1027.05	4662.98	461.05	322.821		480.039	1212.45	15082.8	1230.31	1197.72	1044.84	5142	7275.09	2892.42	2475.33	22629.3		1489.08	8951.02	4253.13	3437.43	3008.82	5484.48	6114.21	4031.26	2787.97	6359.19	2323.52	5102.71	6412.99	7413.51
P23610	HAP40_HUMAN	40-kDa huntingtin-associated protein	F8A1	10	17823.3	16784.4	17325.3				258.549	3498.04	2948.23			296.805	5750.2	177.618	62.1308		148.113		113.329		687.603		25895.6	344.896	50.5453	778.146	139.892				669.105				253.532		778.59	856.769	659.675	674.731	677.692	472.661	391.851	512.118	443.254
Q8N2F6	ARM10_HUMAN	Armadillo repeat-containing protein 10	ARMC10	11	11176.1	7262.02	6725.29	13403	558.663	979.83	1074.98	882.586	668.055	754.499		1102.51	859.164	10258.2	14315.1	13139.8		13094	253.96	13477.8	16040.2			12516.9	11816.8	7957.85	2673.79			127.192	112.302				16543.7	1016.4			189.894
Q92743	HTRA1_HUMAN	Serine protease HTRA1	HTRA1	8	469.138			72145.7		1527.72			45502.4			49582.5		10253.2	44087.7	1595.76	35836.4	1538.38	7843.9	7642.81	200.173		22010.4	259.106	256.4	233.914	15321.1	4063.36	215.426	160.663	370.382	1799.65		106.194	213.621	244.677	794.857	417.406	398.933		14717.5	50263.8	13913.3		191.882
O95816	BAG2_HUMAN	BAG family molecular chaperone regulator 2	BAG2	31	66652.7	57469.3	48820.3	91823.9	35040.4	31565.6	54494.4	47821.8	42346.4	48471.2	31670.9	49156.8	39371.1	38351.4	59638.5	70954.8	43938	52621.8	47139.4	39640.7	32439.2	32998	66070.6	44463.1	53012.2	145258	76863.6	43238.3	34098.7	52212.5	53010.3	42111.8	50843	40976	47095.3	64275.7	44915.6	45709.9	47988.5	57430	58430.7	57364	45547.8	44489.8	54951.3
Q92544	TM9S4_HUMAN	Transmembrane 9 superfamily member 4	TM9SF4	17	12486.5	18243.3	16851.7	4756.84	5678.44	6048.74	5510.55	12116.4	7989.3	2603.02	173.142	6713.46	9601.9	3849.51	51018.2	5881.17	2696.55	38165.2	11391.4	6868.52	2513.75	3519.85	17835.5	4213.69	13208	4091.07	29635.1	24322.3	83448.5	3451.53	7767.61	5726.44	1435.3	6473.71	7610	17208.9	10674.4	24915.5	13137.1	12295.4	9775.98	11269.6	17802.5	13379.1	14771.3
Q9BV29	CCD32_HUMAN	Coiled-coil domain-containing protein 32	CCDC32	3					238.017																		71.8963	82.9291									944.937							122.574		738.037
Q6ZNC8	MBOA1_HUMAN	Lysophospholipid acyltransferase 1	MBOAT1	7							4113.34		595.04	1404.52					74.7485		636.534	139.766		397.605				710.063	510.525		360.404			1811.21				1329.89			364.892	68.5298	354.269	1008.21		2017.11	393.77	635.548	425.661
O60673	REV3L_HUMAN	DNA polymerase zeta catalytic subunit	REV3L	5									469.279	929.344				771.382					246.734	711.019				1281.4			12679.2			1074.32								7297.09
P20248	CCNA2_HUMAN	Cyclin-A2	CCNA2	18	483.766				1234.06	2206.76	5217.31	470.826	830.08	889.064	392.743	496.22	619.662	35676.8	264.445		33402.5	25741.1		1025.28	575.426	268.523	373.199	798.86		650.995	19958.6	1994.65	3528.92			1943.13		1958.79	573.316	69878.9			364.303	859.064				387.448	9175.23
Q15390	MTFR1_HUMAN	Mitochondrial fission regulator 1	MTFR1	8	239.347		1468.3	1088.56		1001.4	874.289			194.537		1019.34	976.104	749.532	594.508	757.914	590.86	1306.07			1174.77	315.039	483.31	321.628						1443.31	1507.41	125.967	85153.2		243.91	202.976			354.77		656.583	687.327	418.752	421.883
O14936	CSKP_HUMAN	Peripheral plasma membrane protein CASK	CASK	42	19919.2	17137.4	23286.3	1245.41	1231.28	867.527	7457.42	4783.34	3450.79	4971.91	2291.91	10620.9	4655.58	4206.71	5225.83	7376.84	13954.4	2873.31	2019.52	4338.21	2495.7	2739.58	4952.15	3874.78	3556.21	9622.84	2419.27	1537.89	977.835	20505.7	276.177		1426.88	458.766	1316.07	420.259	882.856	5390.51	13068.8	5016.13	2355.25	364.173	1166.31	1564.66	1707.23
Q15075	EEA1_HUMAN	Early endosome antigen 1	EEA1	98	141892	168050	82282.4	58627.8	57343.4	42293.1	50606.1	48426.4	40200.1	35759.8	23947.9	35326.8	47864.5	41737.4	31777.5	25289.9	49415.8	29322.1	28348	36256	43604.1	18546.4	54834.2	31475	37878.8	47494.3	110326	93002.1	126631	26949.9	37329.7	34644.2	55882.4	48210.3	61004	117962	55884.8	53321.2	152999	164895	34304.7	176436	20129.2	138418	28361.1
O75037	KI21B_HUMAN	Kinesin-like protein KIF21B	KIF21B	12	2608.48	11159.5	3114.59	53139.7	4292.69	4185.56	2428.86	1367.05	721.203	206.204	3948.36	50206.9	1289.6	939.86	49202.6	1100.66	1487.21	1969.18	1461.5	42762	48923.4	18737.4	1555.88	2900.86	2817.7	19518.7	6372.6	1717.83	6223.06	6533.73	2371.14	2409.74	3334.43	40007.2	1962.21	2167.45	6883.12	1790.57	4600.49	6786.47	6796.02	8144.18	1896.93	5068.8	1803.47
Q9Y5W9	SNX11_HUMAN	Sorting nexin-11	SNX11	8	4264.85		1670.19	755.574	2731.45	268.367			3796.55		413.82						205.294				1065.96	471.451	1610.87						1869.02			7706.97	2329.4	147.729		177.954				3288.31	232.918				565.423
Q8WUN7	UBTD2_HUMAN	Ubiquitin domain-containing protein 2	UBTD2	8	585.014	853.346	464.297	717.711			6650.25	118.978	325.094			294.995		614.832									1259.5	1100.15		563.134	1606.21	6380.36	10173.5	133.016	890.23	647.83			9167.64	187.385	7338.59	7907.61	231.071	177.814	688.866		491.937	113.21	117.154
Q08AM6	VAC14_HUMAN	Protein VAC14 homolog	VAC14	29	295769	5192.42	5584.15	5902.28	9946.68	7362.47	4061.28	11542.2	4054.35	2575.41	2012.36	2505.87	6002.07	3360.15	4994.85	4791.98	1994.88	4708.41	3284.51	4486.33	3534.97	1608.35	4646.46	4337.31	4221.28	6339.89	7992.36	8828.66	10000.1	7955.43	9609.57	11132.6	2448.43	9171.95	11529.9	10903.4	8779.47	6280.59	6169.17	18831.6	11560.8	8044.7	7102.95	8822.74	13967.8
P04792	HSPB1_HUMAN	Heat shock protein beta-1	HSPB1	57	77610	75048.2	98211.3	41088.9	32652.3	35109.5	338131	363267	334803	326913	73215.1	457195	383032	336981	299689	339650	317752	309487	334422	189240	307951	54575.6	396422	410544	302599	371335	96447.9	68192.2	50895.8	89474.8	33729.2	31610.8	53049.3	74389.9	63482	62138	84753.8	76623.5	239000	53588.8	63656.7	70763.4	57641.7	76857.2	69141.1
Q99707	METH_HUMAN	Methionine synthase	MTR	25	12622.2	16693.8	1437.29	1853.95	694.283	5037.97	19076.1	20037.8	18130.7	19377.7	62481.5	19505.7	20447.4	19188.2	16047.8	17925.9	12235	8693.32	1210.12	694.519	2294.17	66006.2	17412.9	14716.5	6107.64	17155.1	7223.03	19756.3	25349.7	1926.55	2215.09	1993.76		7986.13	10827.9	7397.82	4099.75	999.918	71607.2	57002.6	53310.1	2889.62	15587.7	4720.86	16770.9
Q9NS73	MBIP1_HUMAN	MAP3K12-binding inhibitory protein 1	MBIP	11	3438.67		1066.12			618.093	352.598	347.891		1635.17		280.154	584.27	529.817	372.495	398.274		20766	318.562		353.443	120.922	1962.89	242.876	299.586	329.734		2848.88				4572.69			159.675	143.303	223.427		520.411		206.779	5485.63		4589.82	9280.53
P0DMU8	CT455_HUMAN	Cancer/testis antigen family 45 member A5	CT45A5	8	1209.23		117.006		271.591	316.857	830.907	5232.83		298.671		195.702			1740.66		379.078		115.752								1164.64								66220.3				12627.7			909.821
O00264	PGRC1_HUMAN	Membrane-associated progesterone receptor component 1	PGRMC1	18	8951.2	10057.2	16657.9	20559.8	19541.4	51793.6	24618.2	21177.4	18920.4	19405.8	6663.77	21147.2	156446	22674.3	89173.5	94392.7	26595.5	20414.9	22274.1	24640.1	22544.7	5891.48	34535.9	19337.5	26510.3	32450.6	100271	21052.5	16545.5	10744	11838.9	11253.1	11912.2	8337.09	109227	8571.94	25328.3	21374.5	21735.3	24935.5	41569	30510.4	38136.4	33424.1	23950.6
Q6YP21	KAT3_HUMAN	Kynurenine--oxoglutarate transaminase 3	KYAT3	19	22102.2	21828.9	23913.9	4708.76	1246.3	2241.59	978.753	7431.06	1439.62	1571.68	12448.1	182.112		1061.27	3985.97	281.726	3131.65	1076.55	1964.14	2441.16	3747.2	3618.99	21149.7	2043.31	718.035	2339.17	7811.12	869.041	330.795				3214.41		6137.31		7323.41	345.389	2953.15	1353.81	670.029	1929.07	599.755	9103.61	892.817
Q9BQL6	FERM1_HUMAN	Fermitin family homolog 1	FERMT1	20	14748.6	16832.6	14440.4	23089.5	7438.28	4495.37	4674.12	1839.01	1281.55	6104.41	2496.07	555.377	108.271	3932.86		230.757	2062.13	1285.18	2970.41	2381.73	2766.74	36523.4	1532.3	1219.16	629.189	1710.57	801.465		97.1764		1319.37	2948.79	2956.31	1808.6	703.143	3858.11	1164.49	499.482	421.831	911.747	456.052	523.055	425.782	514.861	526.223
Q6P6C2	ALKB5_HUMAN	RNA demethylase ALKBH5	ALKBH5	15	4966.46	4093.25	3948.54	2227.81		5034.55	2979.6	337.211	3713.07	4506.57		4725.95	7234.5	3792.28	1681.89	27955.8	1410.35	72.1321	303.373	2106.07	2205.19		2169.89	27236.8	2626.66	4242.75	44952.4	815.405	1751.55	1517.25	1687.25	1557.81	300.428	2119.59	1282.65	1452.35	2128.98	1040.19	3773.2	1627.79	735.507	27532.6	1286.45	1352.4	26625.9
Q9H7L9	SDS3_HUMAN	Sin3 histone deacetylase corepressor complex component SDS3	SUDS3	11	97.0205		819.868		4885.06	1317.59	2194.18	1708.38	1546.82	1415.04	10478.5	1823.7	2644.9	649.243	352.436	173.374	2154.29	1217.66	1149.04	2168.77	2066.75	8555.66	2352.89	7145.49	2333.66	2150.55	2016.69	829.563	1893.19	808.256	986.691	1342.7	934.897	989.977	1703.79	1601.65	6028.55	2242.32	2455.5	3504.94	1983.76	3816.54	1558.35	1297.95	1653.49
Q8IXJ9	ASXL1_HUMAN	Polycomb group protein ASXL1	ASXL1	14			83.3204	198.839	1522.94	4997.3	5184.15	559.931	1044.23	1083.87	21771.9			352.724			1781.86	1517.71	624.158		956.387	1003.98	1338.84	73429.2		2334.3	2643.38			1564.59	2613.96				9010.1	3899.61		2698.09	1096.11	1534.53					3061.79
Q8WUP2	FBLI1_HUMAN	Filamin-binding LIM protein 1	FBLIM1	10	1408.76	1701.08	2085.57	514.734	1333.6	1182.8		1125.5		880.938		639.238		360.043	4048.75	1274.49	455.419	388.641		146.988			4435.99				213.527	3058.26	1030.18	379.058				354.362		593.932	133.417	272.583	946.915		311.751			832.956	397.478
Q8NEA9	GMCL2_HUMAN	Germ cell-less protein-like 2	GMCL2	5						2014.52								2064.66		218.53	277.074							994.015	958.715		1361.07					132.741					3702.2	709.369			1617.41
Q13283	G3BP1_HUMAN	Ras GTPase-activating protein-binding protein 1	G3BP1	79	184106	207169	218893	108931	80805.3	63653.6	92054.7	106531	63708.7	88191.4	65878.8	61296.2	84696.4	64822.1	58280.2	51431.6	94314.4	88353.8	84712	83540.6	140060	76256.5	178455	205209	160985	141615	77936.6	75897.2	115445	65569.7	119958	66588.8	85059	74366.2	64942.6	295194	80353.8	92187.3	97652.7	72693.7	73627.9	77585.3	68036.2	93577.9	78821.8
Q8IZ52	CHSS2_HUMAN	Chondroitin sulfate synthase 2	CHPF	16	17330.8	16490.5	2648.9	1227.98	2563.78	3495.83	82764.6	2813.14	2058.57	202.027			234.726	63982.6		64516.2	511.774	1358.05			7209.48	8337.54	417.509	1767.34	799.843	9169.48	644.574	1112.95		991.276		298.492			751.195	19054.2	737.486	469.824		50053.8		53746.5	146.636	1023.85	39046.9
P47813	IF1AX_HUMAN	Eukaryotic translation initiation factor 1A, X-chromosomal	EIF1AX	15	33334.1	41757	40188.2	6238.04	8509.89	9926.65	60456.1	62508.6	54569.3	54218.2	1951.78	51361.3	58912.5	51532.7	53108.5	53051.5	40883.5	48967.9	45611.1	52454.8	62074.7	2187.36	65500	50709.4	53134.7	56170.8	40737.9	43309.1	45293.5	26435.4	27135.4	12832.8	2572.83	26274	31234.2	29904.9	29906.6	32037.3	31797.5	14278.6	15295.6	15965.1	24948.6	25353.2	25655.9
O75152	ZC11A_HUMAN	Zinc finger CCCH domain-containing protein 11A	ZC3H11A	43	10760.8	13493.3	11105.2	5958.86	11826.8	61072.9	9633.58	18764.7	11707.6	9965.47	9036.66	8566.43	17284.3	8274.7	6593.14	25280.3	36489.7	5321.84	5177.74	13679.7	9604.5	3601.94	15881.7	28872.4	30446.3	9453.78	128336	9235.86	39278.6	7229.08	7312.67	7325.06	8607.77	31396.4	33837.4	26791.1	13698.1	18333.2	39444.3	13882.1	14522.5	13245.1	9720.83	39817.7	12034.9
Q9NWL6	ASND1_HUMAN	Asparagine synthetase domain-containing protein 1	ASNSD1	16	1479.94	25187.1		323.088		2362.9					1222.74	1246.47	3969.22			523.546				19863	572.915		11368.3	4085.78	383.147		5197.67		10373			3498.98		879.047	5081.38	4455.07	8355.95	6416.97		1009.55	3656.29				2662.18
Q92990	GLMN_HUMAN	Glomulin	GLMN	27	1791.83	9378.89	20065.3	7451.27		1620.57	11467.7	12020.4	1924.88	3776.58	14873.8	5695.45	4446.89	11899.7	11037.2	33213.2	6117.46	6015.31	4900.91	4274.77	2451.23	3498.75	12891.6	10908.4	6439.36	2461.07	19975.7	34488.9	24761.1	1866.06	9379.38	2263.55	2154.5	13380.7	16283.6	1817.47	12134	31572.5	22791.5	23295.9	21071.5	3733.18	24136.9	10627.2	2934.85
Q9BZL1	UBL5_HUMAN	Ubiquitin-like protein 5	UBL5	8	6317.67	3483.79	1535.24	6490.87	3542.25	6133.34	17050.6	15567.2	11747.2	22800.3	7182.23	11925.8	13765.2	13630.9	11719.1	12324.7	2944.52	5955.95	6169.03	6263.59	5417.16	7685.13	6513.61	3676.15	4042.09	6518.18	7313.57	9671.23	7225.36	10045.3	6707.2	9703.66	6579.95	11515	12490	10005.2	2483.48	8219.56	3111.29	4045.82	2213.2	2338.77	2192.31	1923.02	2213.89
Q8ND76	CCNY_HUMAN	Cyclin-Y	CCNY	6	5968.19	3449.98	4295.22		9127.91			15798.7		24359		3486.95		2470.31	610.614		570.873						2945.07	2432.41	36321.2			2059.49				120.004	783.826	2322.69	612.859	1057.95	1140.98	1994.88	2114.06	425.332	332.665	3358.02		3094.05
Q08117	TLE5_HUMAN	TLE family member 5	TLE5	8	12647.6	463.049	974.447	2515.57			1299	1178.7	1125.75	1746.35	898.764	1318.52	1500.77	1233.3	1430.17	1278.81	1170.35	494.728	1108.43	805.093	575.99	992.088	380.199	521.102	747.799	937.056	853.145	860.09	997.343	818.842	881.228	926.764	1160.76	751.718	605.727	573.223	860.131	226.085	373.219	206.566	329.155	394.829	266.935	180.016	370.252
Q16850	CP51A_HUMAN	Lanosterol 14-alpha demethylase	CYP51A1	35	101139	59843.2	17605.8	5415.16	5951.74	13007.3	8729.84	14006.6	10590.6	19918	4448.26	15664.8	18358	51919.8	54496	14387.6	11868.1	13149.3	7573.54	5955.62	10868.3	4626.83	6664.08	39557.2	9306.99	18295	65890.6	65033.7	66974.1	6823.22	2915.14	1534.6	6602.76	66251.1	55625.1	67859.6	27445.7	43717.2	45697.3	28650	7667.14	34413.6	25543.3	14219.6	29261.7
Q9H3K6	BOLA2_HUMAN	BolA-like protein 2	BOLA2	18	19917.9	85852	17241.4	11188.5	12506.7	13052.3	30704.9	38536.8	30982.3	36282.2	6205.42	27239.9	33689.9	21684.4	21346.6	26328.3	20160.4	19553.8	25501.4	20477.4	7922.39	6776.11	20063.5	21114.3	48084	22323.9	22122	41088.2	218419	15166.3	27778.5	8437.17	6241.95	15540.3	17039.7	18299.6	46992	10343	11981.9	8864.94	8841.8	11018.6	6003.33	16884.2	23063.1
P20290	BTF3_HUMAN	Transcription factor BTF3	BTF3	22	27650.9	20086.8	17248.8		287.214	2200.93	14303.7	26697.1	192637	119829	27167.4	20727.4	23202.9	19362.7	27129.8	16090.7	38732.7	16509.6	86719.4	12405.6	16591.8	8810.52	20328.1	8628.1	11971	339547	7457.52	11805.4	11462.7	37402.2	40311.9	266965	23259.1	10223.7	51826.6	333422	12172.9	13059.5	14235	38554.2	276281	10929.9	11655.1	11488.4	13318.2
Q9BTC0	DIDO1_HUMAN	Death-inducer obliterator 1	DIDO1	75	11024.7	8165.69	21201	12404.9	12684.3	7118.73	57214.9	65327.5	54447	29935.1	10160.2	44312.1	47554.8	37151.4	41692.3	35244.8	47980.5	40786.1	34881.3	30804.6	41377.3	8657.12	57457.6	54184.9	59664.2	56248.5	50066.5	23800.4	50429.5	25843.2	21499.7	23226.8	11674.5	38235.8	25215.2	41555.2	45927.2	75947.4	57668.5	42686.6	38469.3	39364.6	38793.3	29613.4	37128.8
P02008	HBAZ_HUMAN	Hemoglobin subunit zeta	HBZ	3	32066.8	32468.6	31793.9	18002.7	4584.02	4231.04		4250		1397.7				159.925		123.981		1794.48	1143.11	762.267	1686.75	2398.13	18472.2				1621.66	1384.33	1512.91	3996.2	3652.63	3489.85	688.405	3055.9	2510.36	2528.55	13008.3	15086.4	10676.3	14862.8	14726.6	10973.1	11704.4	17464.4	11786.2
Q8N3Y7	RDHE2_HUMAN	Epidermal retinol dehydrogenase 2	SDR16C5	4	353.509			548.717		3246.9		245.276									450.059	889.594	3000.86		819.529			554.749	1561.15					7005.82											1411.86
P35237	SPB6_HUMAN	Serpin B6	SERPINB6	52	94849.8	80319.6	88283.5	20300.2	58105.1	73775.4	29346.1	33119.7	22408.5	42535	38326.9	46009.4	32057.6	30602.9	37792.5	30142.5	38252.5	37471.2	45447.3	44072	41777.5	51161.3	69277.3	37255.6	42237.5	45583.2	83901.9	52974.9	79006	28062.5	7899.31	41228.7	13272.5	58827.3	65806.2	66000.5	24759.8	23402.3	25935.9	26039.8	14081.7	96482	20869	26566.7	19313.4
Q8WXA9	SREK1_HUMAN	Splicing regulatory glutamine/lysine-rich protein 1	SREK1	15	5310.28	3340.16	5483.9	2045.41	3057.9	2118.6	6937.12	5409.41	3195.37	2405.47	1331.23	6401.64	4342.43	10216.6	11473.6	2306.76	3153.38	4950.84	1275.85	3320.41	2934.16	11245.4	2063.7	20873.1	1781.18	2716.52	2311.06	2855.08	10956.7	3412.73	2914.71	3449.32	1697.58	6619.2	11692.3	3004.74	1997.11	4768.21	4136.45	3766.11	1825.62	2461.91	2206.29	3452.01	2423.33
Q9UID6	ZN639_HUMAN	Zinc finger protein 639	ZNF639	6				585.293				30115.7			13760.2	129.666	263.035	133.885				1661.99									378.63	1631.4							325.288	1940.16	377.279				2879.47			252.649	865.76
P43487	RANG_HUMAN	Ran-specific GTPase-activating protein	RANBP1	29	85985.6	74133.4	57871.8	60976.7	47699.5	35662.4	104397	97960.4	49161.7	60678.5	31810.3	55901.8	49008.7	18703.1	36844.5	38418.5	70743.6	54087.6	73876.7	60055.4	133937	21483	80463.3	92026.8	88180.9	93190.1	43944.2	49958.4	23708.4	26732.9	19126.5	22953.3	39940.6	25304.2	50661.7	28941.5	17082.2	21391.1	38682.1	28828.4	40052	45514	36340.1	37700.7	36889.6
Q9HCE3	ZN532_HUMAN	Zinc finger protein 532	ZNF532	13													370.797														726.198	562.646	1787.3	646.198	953.153	881.28		952.867	3640.69	550.239	1092.58	1318.46	1258.18	731.85	808.093	542.154	785.092	277.184	1203.05
Q96T52	IMP2L_HUMAN	Mitochondrial inner membrane protease subunit 2	IMMP2L	4	41955.3	1589.12	36662					739.529	1951.27	584.173								1177.51																370.748				692.281				9391.54		3489.62	253.47
Q9BRT9	SLD5_HUMAN	DNA replication complex GINS protein SLD5	GINS4	17	645.979			1924.7		152.281	1147.41	6474.09	5362.24	17403.8	1222.63	3933.45	4200.45	1270.38	9751.78	771.965	2133.79	3127.62	3970.83	3543.3	4692.78	662.115	5953.85	3713.22	3904.96	5834.1	3094.12	1061.12	373.741		1095.18		839.914		465.922	547.175	1290.1	713.658						264.056	395.652
Q9H2C0	GAN_HUMAN	Gigaxonin	GAN	29	24106	31718.6	35500	14940.5	13296.6	14260.3	1339.92	2225.28	2794.55	1187.84	12052.8	3499.41	4866.62	617.601	7128.18	501.102	808.656	1251.13	2069.11	3467.35	1581.37	11595	4111.01	4363.78	3548.17	2401.95	832.468	700.149	3801.83	546.66	1063.55	541.942	16019.5	11830.1	1352.76	2285.97	805.134	1285.42	4983.75	1265.17	2977.11	7032.01	4100.53	2095.27	8243.7
P78316	NOP14_HUMAN	Nucleolar protein 14	NOP14	37	8111.32	8792.98	72214.4	1013.31	6046.01	6800.63	11784.9	6065.44	10558.5	11861.2	678.968	11409.2	52677.3	9219.82	9214.42	10532.9	16403.7	39526.3	11315.3	10656.5	18325.5	127396	11248.1	24602.2	14815.4	21357.2	8618.8	7965.71	7336.95	7328.94	2330.74	6565.06	5737.16	2255.16	3652.04	9202.93	25164.5	19440.7	20140.9	20333.6	18035.8	21814.7	30039.2	18007.1	17219.2
P35222	CTNB1_HUMAN	Catenin beta-1	CTNNB1	27	51049.1	139856	57086.6	26840.8	221488	230324	20120.8	5803.16	6510.29	19301.2	21457.2	33925.4	7096.52	15472.3	6574.31	11897.8	9225.2	9873.98	6484.07	6170.11	19703.9	28616.6	10673.5	12073.8	8714.36	18360	21621.1	18737.3	63315.3	19591.3	10129.6	32323.2	27211.6	43325.8	25304.6	15201	26616.8	21672.1	23008.1	25330.2	24515.1	25164.8	16120.7	18571.6	16147.6
Q9NQX7	ITM2C_HUMAN	Integral membrane protein 2C	ITM2C	4	5103.51	5149.28	4895.85		447.858	950.083										3333.41	738.985									313.903	1001.77	3628.58			141.869				5142.77									893.844
P37275	ZEB1_HUMAN	Zinc finger E-box-binding homeobox 1	ZEB1	13			77.629	19962.1	25353.3	1178.02	2325.13	6480.97	26416.9	22237.5	1333.45	23122.7	4948.24	20072.2	3049.58	3452.64	1307.48	1388.92	1159.38		10854.2	17664.2	1358.26	2948.11	2482.22	1830.48	37692.2	1831.86		16620.5	282.623	2789.85	2023.74	12956.3	1542.45	16776.1	3567.05	1956.74	1136.76	486.648	254.483	1064.74	19447.5	2175.7	3256.79
Q9Y3E0	GOT1B_HUMAN	Vesicle transport protein GOT1B	GOLT1B	5	8007.73	9857.84	14768.5	7478.16	6086.81	6701.14	1662.56	7388.62	1375.15	5155.99		790.234	1657.22	367.861	112.3		6048.07	4023.45	5096.06	3839.72	7324.23		5053.51	6240.71	5808.27	5355.77		629.978	967.214	554.56	730.379	2875.79		576.26			14225.5	14017.3	15557.2	16474.8	18998.7	16661	14236.1	10937.3	12785
Q14257	RCN2_HUMAN	Reticulocalbin-2	RCN2	18	45937.8	42047.4	36725.2	2119.22	1742.54	2614.05	3309.67	6425.5	2126.27	1458.2	3369.3	588.15	6396.16	2324.27	1702.06	896.574	8991.6	4171.36	624.052	10399.8	2874.49	2179.29	2924.66	22959.9	5443.2	2348.82	3365.93	369.171	401.174	5986.71	1059.75	3448.13	3604.35	2523.81	2575.66	2705.39	100.081	184.993	6669.27	2887.48	3679.79	5021.28	4362.63	4541.87	7477.36
Q9H000	MKRN2_HUMAN	Probable E3 ubiquitin-protein ligase makorin-2	MKRN2	17	2122	12698.3	20063		149.504	5000.69	5629.48	3967.12	2587.35	2900.62	766.466	4419.88	4882.35	6918.14	3457.43	5562.43	1750.02	2319.32	4388.36	2471.37	6969.76	301.793	5148.89	1889.75	1702.02	2006.19	1301.27	281.31	644.115	1525.82		454.063	4639.05	151.108		6679.18	1409.39	950.569	935.658	308.66	1624.15	1091.78	3983.26	2507.78	3156.3
O94973	AP2A2_HUMAN	AP-2 complex subunit alpha-2	AP2A2	68	56421.9	56268.4	53251	54376.3	45521.2	108204	56071.3	30608.5	34021	34467.9	22572.7	21212.1	25936.8	16302.4	15962.8	15401.5	14438.7	15250.6	19816.8	37454.1	16437.2	23634.1	19714.2	16575.9	17191.2	19910.5	22635.2	16840.2	59487.2	26163.3	20607.3	24477.3	25587.8	16422.1	40817.6	17886.2	14972.8	11496.5	18506.4	22228	13419.1	25196	17983.1	13104.3	29773.6
Q9H7X3	ZN696_HUMAN	Zinc finger protein 696	ZNF696	6		342.833		423.994					443.825	2150					862.756			12758.5		2902.4			642.636	192.545		504.022	15592.4				16524.5	17284.4						13717.7			30187.5		1265.99		15083.3
Q15042	RB3GP_HUMAN	Rab3 GTPase-activating protein catalytic subunit	RAB3GAP1	59	18064.2	35392.9	36882.7	21535.1	21408.7	16973.5	96316.8	101018	35877.5	46395.5	16366.2	57656.4	30984.5	17587.4	64013.9	3989.37	6077.73	27518.8	8753.93	15705.4	69188.5	9001.47	10473.1	58138.4	7898.13	14779.5	27969.9	13740.6	4657.06	2377.59	1537.01	1857.19	5891.35	6564.21	8219.65	3719.18	5551.39	5641.72	28920.6	3579.49	1398.52	9394.76	71256.1	5993.42	5021.29
Q96BM1	ANKR9_HUMAN	Ankyrin repeat domain-containing protein 9	ANKRD9	5			200.867			83.1449		4891.1				778.699			7650.51	2213.6				11894		14431.6			5372.97		1251.17	210.442	2288.79					515.185		2036.71	373.539		8939.73	6920.09	1713.23
Q00653	NFKB2_HUMAN	Nuclear factor NF-kappa-B p100 subunit	NFKB2	51	71997.7	83457.4	94713.8	78630.9	51424	53487.9	13412.4	7218.77	5494.75	11374.6	26575.7	42813.7	4320.79	27722.6	48795.7	6631.99	14661.4	18450.7	3983.52	8392.3	7970.89	31506.8	5230.47	4961.93	8537.05	10401.6	30567.7	2134.45	3901.6	2458.27	5220.08	6230.97	29657.2	4105.91	14480.8	3496.21	4589.97	2870.12	30427	30409.8	3672.84	9670.03	13198	25497.9	23962
Q9P015	RM15_HUMAN	39S ribosomal protein L15, mitochondrial	MRPL15	31	39280.7	52864.4	20089.5	5521.23	3546.02	1222.03	2404.81	23028.1	20162.1	20022.3	2262.32	1045.71	2750.53	1371.16	734.704	15630.6	7841.64	1078.06	2635.41	3319.04	8815.09	1653.21	3502.8	996.604	3430.74	521.741	4245.03	1872.8	2402.66	7505.63	967.068	3094.91	576.127	4675.53	1999.61	5757.91	12471.2	7526.67	10850.7	13031.1	19004.3	69280.7	59494.2	14809.8	61614.1
Q9H7Z7	PGES2_HUMAN	Prostaglandin E synthase 2	PTGES2	39	13467.5	17902	16444.9	74036.2	17104	54331.7	90942.7	19997	44518	44574.1	15456.2	24202.5	25299.3	22826.6	13817.8	20647.5	16254.3	14829.8	15955.9	22709.3	12913.8	21937.4	17696	25254	27343.1	25055.9	21626.5	31116.3	16487.9	21049	19428.9	26451.5	8736.3	19954.2	20861.5	20475.2	18350	18308.7	17735.7	25231.6	24634.4	22859.2	25364.7	19644.2	27313.3
O14829	PPE1_HUMAN	Serine/threonine-protein phosphatase with EF-hands 1	PPEF1	9			92.3267	181.832	320.555	4259.67	1044.35						220.48							8770.1				8239.76		1355.19	1158.02		1684.75	1963.7			8702.56		13335.5		475.971	422.598							781.934
Q969E2	SCAM4_HUMAN	Secretory carrier-associated membrane protein 4	SCAMP4	4	21548.8	25565.7	19744	20921.9	17216.2	387.106	1914.64	2708.41	2384.84	2056.4	12463.6	1569.7	1348.28	2118.32	1674.88	1532.42	2166.68		1954.15	2041.94	1868.11	213.107	2334.12	2732.59	3039.78	3300.66	3087.83	3094.23	3171.51	875.417			4893.61	274.957	1153.78	5261.16	3011.88	2417.95	3306.17	1685.96	1851.48	1733.57	2728.23	2715.46	2725.08
P46199	IF2M_HUMAN	Translation initiation factor IF-2, mitochondrial	MTIF2	24	9441.46	6297.58	5659.03	1378.33	1153.45	1848.47	2562.42	1304.15	212239	161.126	576.17	1619.09	217721	211259	218406	208283	1436.98	4698.83	435.381	8511.26	3642.07	6880.88	193645	674.786	908.639	1267.14	1103.84		3792	864.882			1298.19		532.387	2314.23	1219.39	5533.53	3550.89	4491.53	5263.33	195567	3325.31	170087	2573.43
Q5VU43	MYOME_HUMAN	Myomegalin	PDE4DIP	35	142587	87352.3	312.586	7620.73	35014.9	50974.5	1363.61	1603.76	2195.68	2761.51	3767.53	976.253	245.159	5242.77	32929.4	5539.24	2612.52	17058.3	2330.37	2569.83	2258.23	2918.75	35895.2	25781	1204.26	2861.53	38044.8	1455	2472.14	14587.4	3143.3	84504.1	2211.25	3541.18	49879.2	1203.55	6335.36	10018.6	6885.07	8069.58	2266.27	10542.2	9315.16	4867.69	6361.38
Q9BR39	JPH2_HUMAN	Junctophilin-2	JPH2	8						3028.2	2135.16	1704.12		4534.38			201.118					1435.15					2825.41		328.739	1192.92	2134.9	342.301	3982.81	5719.95	534.01	758.016		16435.8	13918.4	17296.5			1202.23		1257.76	1169.68
Q9BQG0	MBB1A_HUMAN	Myb-binding protein 1A	MYBBP1A	112	66341.6	155182	148911	28145.2	60499.7	67561.8	99473	109334	99707.9	100302	8481.83	89757.8	91173.2	87725.9	103199	91681.1	90941.8	94712.4	77865.8	94910	128947	49911.2	96974.3	133055	136230	134711	84488.9	103981	61630.5	49240.9	45461.3	60243.9	10997.3	85192.9	74723.1	64059	89137.3	89038.7	111784	75158.8	84705.7	79477.6	81799.3	85362	85375.1
P17028	ZNF24_HUMAN	Zinc finger protein 24	ZNF24	5									347.012	533.071			826.46	832.463	564.519				497.409					474.215			149.404				431.669							670.263	1402.75	796.204	1017.5	519.547		1450.23	1026.49
Q9BX68	HINT2_HUMAN	Histidine triad nucleotide-binding protein 2, mitochondrial	HINT2	11	44959.3	40258.9	38019.1	44019.3	44903.1	49463.2	31084.8	31216.8	28453.5	26581.9	28723.8	25107.7	27597.3	23989.7	24097	26081.1	15717.1	14691.7	20795.9	18372.2	25957.9	14775.3	19173.4	26120.5	26225.8	28520.7	15666.4	14550.6	14373.9	10268.2	9457.57	8592.22	15400.6	14363.5	14413.2	12929.1	17377	16589.2	15106.3	18393	19469	18156.2	11103.7	16683.1	15104.2
P83369	LSM11_HUMAN	U7 snRNA-associated Sm-like protein LSm11	LSM11	7	2542.36	2346.19						254.981				300.675		5063.96		5478.61	394.116	4694.73	1355.55	169.626		2294.54	288.676		178.757		107.661	116.365	88.2073	341.212	2194.24	1271.08	7916.05		268.382	1114.27		255.388		886.329	436.694	7617.08	953.158	7762.02	2599.71
Q8IYS1	P20D2_HUMAN	Peptidase M20 domain-containing protein 2	PM20D2	25	819.555	6619.73	1208.64	138.976	935.431		8321.97	8736.03	7260.51	8139.39	3068.79	5404.77	15246.3	15315.7	12157.5	6509.42	4055.88	3297.62	4168.93	4273.91	5712.72	965.395	7354.53	5282.46	15424.7	11099.4	2055.05	36723.1	5412.83	3696.63	8323.15	2857.21	4555.03	14362.2	2979.01	3633.44	4277.13	1810.75	4895.48	3874.01	247.318	2695.58	1590.49	2597.04	4781.78
O95825	QORL1_HUMAN	Quinone oxidoreductase-like protein 1	CRYZL1	16	3516.62	2145.55	9329.08	3279.71	1455.59	2811.05	11970.4	9613.17	3378.79	3935.81	1168.84	141948	2948.41	7347.53	171744	4113.42	176276	2089.6	2616.94	2728.12	2482.02	454339	4466.63	3139.85	1010.78	3804.78	1458.33	1159.56	29318.5	26897.2	1611.89	1006.71	406202	2183.76	2872.28	5586.51	507.715	7550.57	9713.29	309888		244781		146.919	13175.8
Q8N5C6	SRBD1_HUMAN	S1 RNA-binding domain-containing protein 1	SRBD1	35	622.696	10021.8	15722.9	14697	25205.5	336.219	10765	1621.41	2410.15	1395.48	2613.3	10887.4	16075.4	432.403	1652.2	1313.8	1487.06	6553.75	2915.62	1711.88	4226.5	1262.93	71.932	1325.7	906.197	265.544	118724	2553.24	120121	26098.2	1602.15	1217.25	441.478	12084.5	1632.96	895.873	2221.57	1359.09	13853.4	2564.74	22873.8	28586.3	13559.8	2266.58	4750.16
P45954	ACDSB_HUMAN	Short/branched chain specific acyl-CoA dehydrogenase, mitochondrial	ACADSB	27	28147.7	25816.9	31811.4	16002.9	19092.2	20161.1	12382.6	12897.5	21976.8	9637.91	4636.06	10897.6	8594.75	14021.5	11318.4	83601.4	9287.16	11042.1	8320.27	7894.35	10612.5	14168.7	14807.4	16306.4	11177.8	14674.8	76517.5	1073.76	1782.14	171.166	149.286		11593.4	55052.3	77604.6	81216.4	1018.09	1403.53	2200.65	6683.06	178.804	187.976	2201.53	99.2747	4818.34
Q58FF7	H90B3_HUMAN	Putative heat shock protein HSP 90-beta-3	HSP90AB3P	146	1.69437e+06	1.56459e+06	1.77826e+06	1.3821e+06	1.08067e+06	1.27319e+06	1.42405e+06	1268707	873107	958922	526266	1.18009e+06	941953	831957	842142	910009	1143824	1.13359e+06	976346	1.2207e+06	1.2819e+06	536610	1.27809e+06	1.72199e+06	1.32169e+06	1.30976e+06	965830	997435	1.24686e+06	649206	737065	841620	745615	1.03779e+06	880525	828857	680714	707428	696532	617004	647174	623633	640240	674756	655109
O60220	TIM8A_HUMAN	Mitochondrial import inner membrane translocase subunit Tim8 A	TIMM8A	9	11480.5	12092.7	14225.9	3612.55	8570.33	3992.82	16521	23176.7	19312.4	14400.1		14759.4	22027.2	18536	16371.7	20721.8	11601.4	10396.1	16167	22652.9	12885.7		11338.8	25376.7	12697	18008	14073.6	7900.65	20509.2	18341.3	5368.2	4281.16		2633.99	11119.2	7503.68	4780.88	5489.52	3702.81	2393.79	1570.85	2218.51	3076.46	2199.48	2635.82
Q8N0V5	GNT2A_HUMAN	N-acetyllactosaminide beta-1,6-N-acetylglucosaminyl-transferase	GCNT2	9	23752.9			726.533					6858.43	5704.66	1804.99	1397.48	5890.76	3472.41	1743.57		4080.88		4519.58	5656.02		709.702	7333.77				813.299	58458.5		3454.96					1201.13			157.832	1430.94				2988.2	487.086	3646.18
Q92890	UFD1_HUMAN	Ubiquitin recognition factor in ER-associated degradation protein 1	UFD1	23	25488.4	20183.7	32203.2	2036.07	5314.86	4321.25	11664.4	7914.45	6458.11	14669.1	3081.9	32658.3	22435	6735.32	6731.27	11340.7	38123.2	18455	65266	14745.8	26552.9	2244.7	15271.2	7883.08	5147.39	13239.8	16416.3	23180.2	22207.7	8748.34	5810.14	8439.53	5693	9184.35	12563.3	17910.8	17274.7	22253.3	20491.8	10111.9	21484.2	14786.6	17449.4	17839.4	19585.2
P21281	VATB2_HUMAN	V-type proton ATPase subunit B, brain isoform	ATP6V1B2	37	115454	113385	115992	49206.7	56249.4	71168.7	31248.8	35979.2	32638.6	22408	64489	32977.5	29721.6	28470.5	26092.2	26065.1	22800.3	33146.3	24665.7	23817.4	26597.7	79822.3	21829	27822	24656.1	24236.6	18072.8	21648.5	29008.9	14055.3	18192.8	22182.9	70639.9	24465.2	26654	26277.8	28509.8	15667.2	36478.1	10833.8	27238	28002.5	29416.9	26424	29231.7
Q9Y692	GMEB1_HUMAN	Glucocorticoid modulatory element-binding protein 1	GMEB1	8			1990.63		442.356		1101.79	840.375	9780.52	961.679		1261.44	863.269	893.829	2150.35	2141.59	1491.78		416.665		253.591		11972.4				187.224		3396.14							520.964	222.753		2811.53	5828.4
P35227	PCGF2_HUMAN	Polycomb group RING finger protein 2	PCGF2	3	11328.7	9331.07	66991.3			1572.73	415.633					98.7138								3499.72	370.29
Q15311	RBP1_HUMAN	RalA-binding protein 1	RALBP1	21	9141.51	1938.1	7096.06			1415.73	422.975	981.936	12292	941.908	5205.02	9661.43	1155.58	328.785	1074.29	1024.7		226.237	3561.12	5244.49	932.603	5306.38	901.549	11639.2	2021.36	27297.5	495.372	4166.8		1741.59	771.876	587.371	390.173	3268.59	50949.2	2537.7	1128.58	11025.8	769.005	5629.09	2991.15	4874.99	626.018	6502.98	6041.5
P98171	RHG04_HUMAN	Rho GTPase-activating protein 4	ARHGAP4	9	454.305	4722.74	3965.2	5034.35	2524.34	184.721		4043.41	4966.27	5347.03	7900.44	4107.27	7824.1	6317.22	5732.44	20565.5	13923.3	4620.31				1032.7	7641.5		4821.33		965.847			15375	6832.06	7827.6	3556.82	8133.99	281.969	498.796		823.96	2761.31		2905.83		11576.2	533.94	11453.3
Q5TFE4	NT5D1_HUMAN	5-nucleotidase domain-containing protein 1	NT5DC1	26	5368.6	6510.55	9808.65	3152.26	947.394	816.603	33800.7	20199.4	16407.7	13661.7		13637.9	11671.6	14848.5	14860.3	18993.4	7861.78	9104.07	10586	11142.1	10696.7	8903.02	10330.7	8213.45	8763.58	8817.68	15081	16892.8	12893.1	9116.76	4450.81	2480.05	10419.7	5936.13	7090.92	8197.15	476.212	20918.9	13275.2	11094.5	10238.5	4399.95	8516.13	4502.39	8183.13
Q9BQ75	CMS1_HUMAN	Protein CMSS1	CMSS1	12	3038.33	5476.94	307.331		680.317		6495.81	5714.9	6965.31	9604.43		4747.82	4876.01	15782.9	9260.01	10169.8	6048.75	6938.49	7182.99	5916.93	10324.1		10301	9374.12	9546.09	9809.17	3844.7	1776.06	1395.98		1315.41	33541.3	319.005	2004.13	2168.31	635.398	3891.79	5055.94	5462.21	1877.37	652.711	3244.73	1464.48	1677.21
Q9NSU2	TREX1_HUMAN	Three-prime repair exonuclease 1	TREX1	7		2776.5					2349.07	2283.29	3094.7	2428.81		8144.62	3302.77	2148.09	1980.89	2256.49	1094.57	710.298	2360.97	1069.82	2276.02		3709.78	1354.06	5278.34	1086.2	3450.64	3315.28	6295.3	4684.8	1631.14	1534.03		2694.69	3038.45	7109.79	3734.57	3443.27	4096.58	1731.95	1072.17	1652.86	802.181	1592.22	2066.93
P53680	AP2S1_HUMAN	AP-2 complex subunit sigma	AP2S1	5	1875.12	1666.17	2567.7			254.978	394.865	169.536	220.539	364.157		1960.54	298.283	909.056	1076	445.733	3421.97	1391.96	4058.16	417.336	364.121		333.078	205.881	154.815	201.634	358.673	1487.39	2524.17	4273.22		3510.99		938.228	414.711	277.701			1386.99		626.379	8036.05	146.348
Q9UNN5	FAF1_HUMAN	FAS-associated factor 1	FAF1	32	42852.9	10883.4	10385.8	12879.5	1810.29	2520.1	11761.9	17486.2	34517.8	13211.1	573.795	16257.1	25528.6	14932.3	14589.3	16477.8	18629.4	13021.9	10402.6	10957.6	14016.6	1650	17529.2	16501	8595.01	14116.8	13432.3	9096.62	6782.04	4644.65	6781.8	8161.34	554.456	9862.79	3881.93	5987.83	9843.76	15847.6	12094	9282.17	12229.2	9016.75	10773.2	12156	10099.2
P33991	MCM4_HUMAN	DNA replication licensing factor MCM4	MCM4	135	5337.89	28634	29360.6	27921.6	2381.58	5018.97	79521.7	106208	78020.8	62070.5	40001.5	144855	94735.6	73056.1	83981.2	86999.7	126351	57463.4	96709.6	79646.1	106042	5911.13	159400	109021	94745.4	112151	85001.2	92851.2	129812	39436.1	29373.5	42059.4	9058.49	40744.4	40524.9	49264	71204.4	104562	63890.8	54336.3	112344	75261.7	52050.3	54822.1	46625.8
Q3SYG4	PTHB1_HUMAN	Protein PTHB1	BBS9	5				23988.5	18851.3	17652.4	2778.63		1711.69		1476.46			5795.95	469.959	593.748		1602.33	181.565			1042.06	316.592						649.731				1100.6						1311.32				639.838
Q96DR4	STAR4_HUMAN	StAR-related lipid transfer protein 4	STARD4	13		665.589					81.8729			2423.42				604.275	827.933	149.712	176.04	1508.27		988.19	1156.01	280.33						1405.04									1429.62	3126.9		1084.55	1674.73		177.425	166.673
P31943	HNRH1_HUMAN	Heterogeneous nuclear ribonucleoprotein H	HNRNPH1	87	431658	421141	446649	38193.3	89843.3	75031.8	295368	308412	301587	266256	87687.4	335729	326686	247717	259680	315220	329425	295476	210779	534598	424566	80625.5	411746	301295	356637	395400	379761	412542	452390	130641	157158	172093	103467	173009	165442	171641	232918	245255	240893	180202	225960	421564	378913	232479	247187
Q96K62	ZBT45_HUMAN	Zinc finger and BTB domain-containing protein 45	ZBTB45	7	1545.78					918.379	10582.6	1286.74				4913.49	789.095	2512.52	4813.66	842.206		174.224			18429	14517								6776.25			877.072										294.823
Q96S99	PKHF1_HUMAN	Pleckstrin homology domain-containing family F member 1	PLEKHF1	9	4989.32	6536.54	6524.12	3539.72	3724.01	4151.72	4749.86	5357.06	4086.09	4291.36		3858.85	3277.99	1978.91	1801.97	1955.74	3295.04	2646.41	2661.48	3629.33	6662.66		2256.39	3074.21	2972.48	4808.3	639.692	2045.08	874.441		1122.17	2240.75				191.987		983.916	577.298	295.901				1749.7	397.457
Q6MZP7	LIN54_HUMAN	Protein lin-54 homolog	LIN54	24	17101.1		650.359				404.408	2792.45	1614.76	181.965		1207.29	346.554	5990.76	34937.9	10267.6	1825.15	1484.27	534.247	2783.72	1611.29	372.834	2184.83	1663.64	891.164	15363.3	11063.8	37572.5	7518.59	17014.2	17338.5	16600.6	70.0371		8549.01		2507.24	2406.78	2027.54	293.052	2784.17	19232.5	1369.01	3742.99	2194.2
P51553	IDH3G_HUMAN	Isocitrate dehydrogenase [NAD] subunit gamma, mitochondrial	IDH3G	21	6281.35	5942	34443.4	320.746	58574.5	802.214	2525.87	2660.07	1944.93	8109.3	1675.35	3584.72	10971.3	6208.15	10357.8	7106.7	3165.62	2859.82	3516.08	7984.49	2781.5	3516.1	3731.42	2614.44	4088.71	4176.03	1158.43	3614.39	1577.61	1254.93	7619.46	9858.5	1293.44	394.557	3740.69	1996.05	9331.38	2412.71	2637.52	1545.39	1815.16	2796.3	1868.92	1754.82	2767.21
O14618	CCS_HUMAN	Copper chaperone for superoxide dismutase	CCS	10		6744.62	6928.82	5363.81	3878.62	2626.42	3285.18	1342.83	1304.59	1186.24	5189.95	2109.79	1942.91		1677.04	4183.56	2792.71	11312.6	3833.03	841.042	2414.73	4974.4	1935.16		2660.46	4004.19	2840.31	3122.19	1996.75	2894.94	3187.16	2984.14	3623.62	3640.71	3606.47	2451.7	1418.82	1848.39	4733.8	1244.1	1295.76	1560.21	622.975	2293	2317.33
Q504T8	MIDN_HUMAN	Midnolin	MIDN	4	53018.3	47857.3	47043.9	65498.1	41316.5	1109.08	262.1	22685.4	19978.1		42591.4	17724.8		16602	16230.2	17707	226.56		14179.9		197.335			338.881	1300.57		496.625	17434.1	473.712		16206.5	17213.6	20749.5	1593.77	18460.7	18182		108.876	17650.4	15977.2	1250.48	863.808		15652.1	12322.4
Q96RY7	IF140_HUMAN	Intraflagellar transport protein 140 homolog	IFT140	26	115.134		4195.16	2434.3			34979.4	2643.25	226.226	1440.35		1992.21	2159.38		38051.2		7267.68	9221.33	27775.9		50132	64864.7	3970.76		35454.6	33913.7	1704.14	2380					50060.6	1361.65	64891.5		7355.03	44133.6	31331.8	997.606	1968.51	19603.1		37783.9	41567.2
Q969G6	RIFK_HUMAN	Riboflavin kinase	RFK	9	309.463						973.577	4891.99		9625		1838.34	1383.46				3638.28	211.204	20190.1				1388					3791.31		3813.11				161.559		8355.73		1537.83	2969.59				154.431	1782.38	7284.28
Q9P241	AT10D_HUMAN	Probable phospholipid-transporting ATPase VD	ATP10D	8	2036.96						5784.53		46424.1				3076.68	2777.05				2540.99	76036.6		418.832			2800.67										3539.83	3755.96							2034.2
Q9Y2D4	EXC6B_HUMAN	Exocyst complex component 6B	EXOC6B	33	850.101	33081.8	402.47	652.633	355.285	10117.6	2311.7	8043.6	23935.5	9864.04	802.87	4707.28	14649.4	11727.7	2252.83	3561.75	1564.89	6613.23	8101.28	4047.84	4753.11	1024.34	4940.4	6837.48	4054.81	6999.41	47051.2	2619.21	3619.53	128.399	1590.91	1339.59	934.955	2155.02	6619.08	2938.24	2499.88	69765	3233.24	38673.2	1659.64	1561.49	1232.13	1630.98	806.573
O14656	TOR1A_HUMAN	Torsin-1A	TOR1A	17	42116.5	45204	21408	13999	11481.3	14277	24946.2	4088.21	21067.9	2668.5	5041.44	1474.35	2074.99	739.178	1042.94	4050.89		12751.5	2432.22	87.7378	2637.41	5180.27	2303.78	2132.69	1073.41	2605.13	3607.22	6720.83	6490.65	1187.86	1879.89	1327.59	419.108	2747.48	3295.15	5893.1	3745.98	3415.51	2863.76	5841.8	2877.44	5771.66	5336.05	11637.8	9321.22
Q6UWB1	I27RA_HUMAN	Interleukin-27 receptor subunit alpha	IL27RA	5	739.98															867.043									4807.51			508.399	642.754										1624.17	236.202	212.947		327.199	406.367	398.587
Q7Z3U7	MON2_HUMAN	Protein MON2 homolog	MON2	52	16607.4	10896.3	2915.76	4148.69	7466.78	122222	6980.74	26412.7	3529.96	6298.05	3670.49	4071.95	6160.75	9382.19	7493.19	6880.7	10494.2	7346.74	12897.6	5707.35	6125.07	14554.8	18564.4	6160.77	10770.3	8507.56	19199.6	7583.9	16546.2	3751.19	16113.8	3544.19	4054.37	7179.44	13438.5	7566.96	8443.46	13450.9	26289	6211.27	5943.7	9355.35	6881.73	6494.06	21005.6
P52746	ZN142_HUMAN	Zinc finger protein 142	ZNF142	7	63.5989			272.347				5656.47			516.504	32340.8	27621.3			421.958			7096.7										4718.3	1503.5													748.041
Q9UKB1	FBW1B_HUMAN	F-box/WD repeat-containing protein 11	FBXW11	21	7483.7	12515.9	456.548	2100.27	708.045	1244.56	1742.96	2360.6	7661.1	10078	2410.6	1381.98	32704.3	1415.34	3017.24	3940.87	2522.04	4042.84	1911.73	2235.22	2886.12	187.163	4479.93	6272.47	4155.17	3782.89	931.222		431.343	942.128	735.567	880.731	854.989	7278.68	1153.42	2892.39	4606.12	2098.41	3421.68	1278.21	2284	2114.3	1094.82	1348.5	2782.89
P10253	LYAG_HUMAN	Lysosomal alpha-glucosidase	GAA	40	162767	148621	163740	69504.7	61732.2	25080.3	16351.4	24874.8	16278.4	11155.9	28117.6	12741.3	17428.5	11934.6	55556.9	13199.2	32779.2	10719	8381.35	23183.5	7437.25	29620	78284.1	12441.5	5308.41	13243.5	4328.88	2094.64	4979.5	6845.86	6027.6	4738.71	38279.6	7681.44	5796.42	47783.1	17757.4	119571	138717	8604.06	75184.6	13244	10955.7	10719.3	120253
Q14679	TTLL4_HUMAN	Tubulin polyglutamylase TTLL4	TTLL4	15	1397.71	1671.96					5003.51	2028.32	3065			1056.72	508.236	472.295	805.792					269.601	527.441					4561.77		5461.49	1157.15	1142.21	1193.09	2011.2		10782.1	1067.73		857.892	401.436	467.999					838.509	1047.15
P29144	TPP2_HUMAN	Tripeptidyl-peptidase 2	TPP2	92	16218	15356.5	52464.3	14128.5	6983.26	13964.3	55195.3	82235.1	61288.2	42497.8	18932.1	79449.1	95956.3	79762.4	44880.5	68516.9	49854.6	66946.9	34558.4	53841.6	53881.3	30928	59271.5	43781.7	40754.8	43639	47052.2	39757	48774.5	27518.4	16592.8	21688.5	36747.7	19339.5	29682.9	112994	70310.4	20203.8	20129.9	11895.4	23486.5	15215.8	25573.1	143726	9003.64
Q8WV22	NSE1_HUMAN	Non-structural maintenance of chromosomes element 1 homolog	NSMCE1	11		1522	361.595	728.565	1800.66		1656.57	1329.67	474.721	453.6		289.294	1223.37	587.571	1018.08	1427.46	706.686		798.716		1519.16		1311.53	2013.02	575.078	3787.87	4937.39	674.455	2122.55	307.347	522.28		6707.53	1013.14	309.054	446.514	186.442	1007.18	766.525	775.191	657.399	615.993	466.82	332.075	1194.85
Q93045	STMN2_HUMAN	Stathmin-2	STMN2	9	669.793	1452.77	1186.89	951.268	1214.5	1346.25	118325	30971.5	85449.6	90167.6	15565.2	107866	70543.6	41235	105803	110596	63880.4	53575	50527.5	55435.9	86094.6	14702.3	93332.7	60810.9	60188.9	64088.5	72387.3	63137.3	70596.7	57220	65020.1	53539	15032.1	72490.2	78083.6	66305.7	21918.1	20883.6	22711.2	13664.5	13406	13568.3	16549.3	15445.5	15810
Q53TQ3	IN80D_HUMAN	INO80 complex subunit D	INO80D	10	1553.02	4365.64	2574.28		8176.29	1202.6			956.614		615.837		371.687			1287.57				410.848	1889.83		4195.94	743.619	2446.29	2554.4	3148.83	5814.38	3082.82					4462.42	2429.25	1043.56	31771	176.088			2237.08		2825.56	3132.09
Q9UEU0	VTI1B_HUMAN	Vesicle transport through interaction with t-SNAREs homolog 1B	VTI1B	10	3953.72	5831.9	4785.82	6156.53	3536.47	4008.58	7730.5	5803.54	3447.75	2804.66	4285.13	2799.45	3374.02	2520.5	5100.03	3009.64	4405.46	2289.37	4079.65	5274.39	4926.69	3224.5	11701.5	12070.8	12252	8911.11	7899.49	8488.14	8798.49	7648.38	9737.52	10913.7	2856.62	8520.54	14338.2	11289.3	13057.5	20227	13102.1	13127.8	11189.3	10274.5	12318.5	8572.65	10142.5
Q96H20	SNF8_HUMAN	Vacuolar-sorting protein SNF8	SNF8	8	4193.54	6014.18	9940.08	15083	3023.17	4390.45	6951.58	6010.26	2416.02	3139.43	1610.76	3972.01	3427.81	1477.29	259.377	1559.24	1590.9	2208.73	3940.7	2464.93	3388.11	15788.4	2730.51	4658.64	5349.02	4534.43	1814.29	1993.48	2427.94		802.897	719.673	19560.6	692.448	1325.57		3617.53	4219.13	4229.95	3886.14	10296.1	3306.36	2943.67	3564.02	2571.77
Q13620	CUL4B_HUMAN	Cullin-4B	CUL4B	64	23515.3	20400.5	21870.4	18155.5	21803.7	22387.1	42014.6	47963.1	52565	53774.4	10030	33973.9	37506.1	35347.8	49730.2	33343.6	28054	31536.4	20790	31686.9	40604.9	21788	35413.9	29741.5	24694.5	37184.4	37461.2	35636	44421.7	22519.1	30217.2	38677.8	8523.56	190106	33065.1	81890.1	14025.2	15204.1	18089.7	14213.2	11114	13856.8	22713.2	26787.5	16545.3
Q969T7	5NT3B_HUMAN	7-methylguanosine phosphate-specific 5-nucleotidase	NT5C3B	15	446.833	27210.6	1552.31	13375.5		13908.9	5185.32	459.277		642.454		6499.42	136.723	8020.35		6982.99			4216.18		1151.13	189.611	1245.97		1329.83	2395.84	13420.6	8236.65	1511.23	1381.85	1867.42	916.036		17117.5			114.325	246.278	10162.6	13267.7	3956.18	6887.8		11015.9	3220.02
Q03111	ENL_HUMAN	Protein ENL	MLLT1	8		789.79	179.087			936.046	3632.95	1072.55	2285.24	1957.76		4156.31	2703.04	2243.77	2133.71	2546.07	2360.98	1713.29	1777.47	1709.16	1877.19		2069.66	2099.33	2256.92	2024.18	818.843	12668.7	905.884	1450.84	593.442	1584.1		1808.56	1381.23	1765.65	3196.03	2433.77	2906.61	2467.49	2790.67	2792.68	2034.62	1385.15	2732.27
Q9H9Y2	RPF1_HUMAN	Ribosome production factor 1	RPF1	21	12782.5	11520.4	10378.1	17984.6	17589.7	23564.5	12894.6	23117.6	20593.3	23358.9	358.551	8250.34	10773	10371.8	5318.73	11608.8	12554.7	10585.2	15768.7	11413.5	13896.8	119.686	12145.1	9337.38	11766.8	11340.3	11486.2	2490.61	22738.8	621.525	343.51	1723.25	151.663	2328.22	894.382	824.202	5736.09	25299.3	7556.17	10349.3	10644.6	102149	8581.25	7768.02	8165.12
Q9NQZ5	STAR7_HUMAN	StAR-related lipid transfer protein 7, mitochondrial	STARD7	17	3336.68	3010.1	2996.7		235.225	3143.73	2134.63	1777.83	19692.4	489.763	1635.52	15409.9	589.242	914.02			1745.91	1611.13	2285.99	1340.13	13165.5	1593.05	13236.4	3078.37	2323.77	6775.07	2833.71	34725.2	26264.3	19824.5	801.928	1386.53	1232.79	7814.16	441.948	8430.94	355.171	1348.74	743.019	3586.25	3398.69	4582.43	729.499	240.424
Q9UKF6	CPSF3_HUMAN	Cleavage and polyadenylation specificity factor subunit 3	CPSF3	35	80446.4	7329.99	5134.13	9081.07	6142.91	6672.05	8196.99	12873.6	7089.56	11556.9	1685.31	24551.9	8159.85	35434.6	10020.9	7748.62	8122.44	9552.68	7471.3	7764.16	13732.7	36427.8	12595.1	12877	12143.9	13086.9	7050.96	38589.4	42675.4	6218.45	3812.31	10330.9	1987.72	4434.66	11611	10000.2	9474.96	9837.2	11390.3	13065.4	14622.4	10574.7	9381.21	9605.35	8405.38
Q3KR16	PKHG6_HUMAN	Pleckstrin homology domain-containing family G member 6	PLEKHG6	2	1092.72	576.883	817.156																																8935.42
Q9BWH6	RPAP1_HUMAN	RNA polymerase II-associated protein 1	RPAP1	39	5917.21	6126.46	17864.6	9796.49	2084.54	1975.24	592.97	16590.7	1516.18	50362.8		16040.9	1944	7147.85	178.173	17711.9	20402.9	265.608	2153.09	10929.9	1251.22	315.601	11945.7	711.767	2322.41	8340.98	2644.64	44695.4	27671.1	5902.24		4841.36		1390.51	8780.89	4787.65	11855.6	1884.57	1428.61	24900.2	6683.33	1390.17	561.558	98911.9	15594
Q9NXJ5	PGPI_HUMAN	Pyroglutamyl-peptidase 1	PGPEP1	8		231.576	286.52			249.738			208.924	2004.4		201.355								7227.3	616.089					88.7553	4154.8		332.376					47.8853						151.287
Q9NQS7	INCE_HUMAN	Inner centromere protein	INCENP	24	20633.7		1952.68	2484.26	2331.87	2074.47	4524.85	178610	1375.83	5398.38	3831.94	15361.3	2085.65	996.079	20163.8	31068.9	5569.76	4511.85	8150.95	2145.99	4238.43	1370.6	6362.3	36323.5	6061.48	4898.68	22933.8	816.423	3957.16	1829.5	10874.9	15477.8	2226.8	19351.7	1538.26	1120.46	2830.49	2860.18	6331.95	7938.78	2243.8	7791.77	3652.97	4336.33	2035.06
P14927	QCR7_HUMAN	Cytochrome b-c1 complex subunit 7	UQCRB	13	48080.6	47770.4	50221.9	25033.5	27574.6	30142.1	10704	12662.7	10898	5436.07	12446.8	8516.76	6071.97	6576.06	6190.54	3466.7	7131.37	5575.51	12028	15951.6	13811.9	22756.5	7522.4	10276.6	29528.4	16785.6	486.886	4958.1	23157	3295.97	15784	13526.4	9896.63	15199.9	7516.41	9227.61	10661	7955.94	901.49	20790.3	22276.5	21292.5	17260.5	12380.7	16522.2
Q9Y5J1	UTP18_HUMAN	U3 small nucleolar RNA-associated protein 18 homolog	UTP18	34	25363.7	25599.1	95562.3	7776.13	2631.16	2562.01	11612	13536.3	9939.09	10556.5	5810.93	9947.91	18510	14244.8	8453.82	10028.5	16917.8	14959.9	15249	10074.4	22532.1	2067.29	25567.9	31873.6	27593.4	24570.7	16768.3	14448.3	13165.3	10639	4189.03	4983.73	6994.03	5416.11	5784.81	5865.98	28917	22483	31201.5	25603.3	21151.7	42009.4	26876.4	32061.9	26002.8
Q9NQE9	HINT3_HUMAN	Histidine triad nucleotide-binding protein 3	HINT3	10	6994.43	2414.77	7367.93	5808.94	8090.14	6183.25	4266.19	4862.68	5116.57	7414.67	332.981	2401.81	4132.81	9370.56	10580.1	5225.76	2671.83	3717.56	4560.27	2557.94	2535.03	681.469	3333.72	2788.02	3750.21	3761.93	3776.57	2709.32	2920.26	875.447	1186.88	5373.09	397.792	1203.24	2394.44	1851.17	3550.45	1217.47	3153.56	2111.82	2934.26	4182.17	2476.1	2681.71	3124.33
O95169	NDUB8_HUMAN	NADH dehydrogenase [ubiquinone] 1 beta subcomplex subunit 8, mitochondrial	NDUFB8	12	26299.9	19923.7	27177.3	4627.34	10768.1	6077.59		59517.8	1703.12	2317.76	521.644	3762.56	7166.36			1564.57	2466.35	2362.16	4145.87	2323.79	4180.15		3282.46	3537.64	3721.11	4462.78	11061.9						740.099	160.457	124.366	2437.12	4152.58	3870.85	5987.86	4161.9	6149.67	4273.1	4169.87	4274.43	3767.72
O95251	KAT7_HUMAN	Histone acetyltransferase KAT7	KAT7	19	1118.96		2980.33	665.158	906.744	2000.97	8150.61	7532.46	5158.84	6326.23	7494.41	3247.47	4645.22	2400.42	3862.13	3533.83	5601.08	5270.28	6273.68	6008.9	5685.56	2539.09	4433.94	8520.57	8065.73	8799.45	2350.01	2971.98	2732.83	1239.77	2355.14	4330.58		2480.49	2105.22	2515.2	7001.71	2868.77	6490.46	5459.64	7020.46	5741.21	4182.79	3370.39	5157.61
P47755	CAZA2_HUMAN	F-actin-capping protein subunit alpha-2	CAPZA2	25	22057.3	61480.7	16169.1	8655.14	4237.44	6316.09	14033.9	17746.5	8540.53	16039.4	2590.49	10094.5	9719.62	41429	44239.4	9587.77	8209.33	35118.2	11848.9	11089.6	18893.7	1155.05	16468.8	15177.7	13234.9	9709.55	34520	33108.5	34533.7	3851.24	14992	2291.12	1588.92	23617.7	26216.9	39134.9	27372.2	19498.6	15639.2	11012.9	15272.8	17702.5	12105.9	20502.1	15325.4
P43003	EAA1_HUMAN	Excitatory amino acid transporter 1	SLC1A3	11	752.204				369.641		1353.98	9750.76	846.362	1086.72		762.148		6629.67	894.337	2173.4			170.614	621.203	7299.66		937.743	7298.67	1843.22	7391.87	4893.39	1147.13	7167.77					2734.65					1574.42
O75925	PIAS1_HUMAN	E3 SUMO-protein ligase PIAS1	PIAS1	12	622.378	663.7	852.887	527.155	369.204	404.856	435.454	9648.07	446.829	9881.16	7849.75	1046.96	68.2312		382.918	392.409	226.802	927.438	2983.71	2500.87				5452.83	1591.94	1579.45						537.009					159.185	697.341	776.915	1187.3	1125.24	1294.57	785.952	626.648	844.726
Q9UKA4	AKA11_HUMAN	A-kinase anchor protein 11	AKAP11	17	779.556	1462.17	863.061	6310.19			540.159	2313.01	1344.86	1393.57	4491.83	474.726	4629.77	1039.22	3865.78			1739.55		3024.15	2114.59	5332.91		2344.51	2763.69	6061.06	1633.89	299.272	2040.79	632.818		1665.89	321.439	762.659	230546	701.071	833.592	3288.55	213.553	643.17	2620.77				730.876
Q96I99	SUCB2_HUMAN	Succinate--CoA ligase [GDP-forming] subunit beta, mitochondrial	SUCLG2	24	86517	86656.8	89272.8	113693	56313.7	102057	20693.8	23188.7	19525.9	17162	30597.5	18207.8	183134	21115.6	17453.8	16744.4	15079.7	24254.9	21897.6	14763.9	166223	333312	13785.7	21151.5	28652.6	24144.6	45353.2	41676.5	12731.1	134146	12906.1	12193.3	343290	268398	54107.7	126345	135229	17081.8	18571.9	38058.5	23515.7	21660	40417.1	22057.7	31302.1
P49137	MAPK2_HUMAN	MAP kinase-activated protein kinase 2	MAPKAPK2	26	9262	11438.8	10434	7619.47	2031.57	48064.4	137.434	56260.4	40413.8	27989.4	2591.28	590.486	71558.7	513.852	27201.5	151.845	95070.7	1054.71	281.681	25573.7	2368.83	2267.13	35046.5	16740.8	1348.89	6189.45	20628.9	53711.9	17500.1	1885.31	339.811	361.993	246200	29546.6	34090.1	640.437	4036	2809.95	8613.67	3172.22	25844.1	10743.7	3599.12	2971.7	2930.02
A2A3K4	PTPC1_HUMAN	Protein tyrosine phosphatase domain-containing protein 1	PTPDC1	12	45706.5	744.587		50778				3280.9	1289.47	1977.39			5627.88	323.793	833.202	10643	43271.9		15065.9	42141.9	57563.7		905.618	3811.96	661.825	3227.85	9799.27	2163.01	35240.5		3961.42			6083.64		26746.3			521.726	89892.6	1104.39	928.193	1159.29	443.433
Q16401	PSMD5_HUMAN	26S proteasome non-ATPase regulatory subunit 5	PSMD5	50	70558.1	64477.5	64823	8577.14	16155.8	40873.9	45916.8	25933.3	13304.8	22709.4	7555.14	54413.2	41148.8	68168.5	36208.7	54490	19236.5	78318.4	159276	84246.9	48727.1	7401.97	57006.1	27266.7	31586.1	28150.6	32577.3	52397.5	51290.2	16429.3	31040.2	14639.2	5430.32	16636.7	15700.5	57056.2	23514.7	16697.1	236702	25380.1	24421.4	26441.5	39472.1	44163.8	45723.2
P58658	EVA1C_HUMAN	Protein eva-1 homolog C	EVA1C	6										1185.7								1421.17		161.16				968.672								429.254					180.683		763.19			476.788	11527.9	302.863
P61956	SUMO2_HUMAN	Small ubiquitin-related modifier 2	SUMO2	12	28604.7	130801	129621	90514.1	142202	81735.6	97086.7	129975	115464	102102	13267.9	106945	101545	105244	112043	79768.9	55054.4	76307.7	80503.1	90006.7	89543.6	47651	87419.9	79885.7	123861	125511	139853	151785	146756	80210.7	80488.9	86701.8	50641.3	106737	99287	97194.4	93788.1	93141	103376	82041.3	85158.8	149233	81044	86260.3	83450.4
O96011	PX11B_HUMAN	Peroxisomal membrane protein 11B	PEX11B	10	13497.3	23952.1	23640.7	5265.51	6881.51	11781.9	5627.05	6668.69	4891.42	5741.14	3340.2	5027.03	3659.89	5279.62	3827.51	6751.69	2636.73	3640.28	2301.87	2311.62	5053.17	4713.59	4332.32	4045.24	4057.1	2556.28	3477.11	2161.39	2443.95	4944.86	1077.95	2277.97	4434.83	2837.5	2654.44	3586.1	5407.06	6072.94	9383.89	5207.64	4887.68	9341.6	6226.82	6722.9	5486.29
Q5T280	CI114_HUMAN	Putative methyltransferase C9orf114	SPOUT1	13	11184.5	4556.48	4245.2	3606.78	4231.55	3423	6605.21	5650.36	3912.14	9110.38	510.177	3338.06	5441.33	1697.3	1106.61	2253.06	1311.85	5889.58	4975.25	5403.47	10439	14924.3	5794.08	6260.32	7252.42	5852.77	2453.87	2395.45	2941.96	5899.45	6301.46			695.776	3212.62		3227.51	3263.58	3875.38	3407.71	3897.87	4058.8	6327.09	26625.7	23328
Q6NUK4	REEP3_HUMAN	Receptor expression-enhancing protein 3	REEP3	6	770.236	3976.5	10082.8	4655.62	642.247								1872.56						619.586				1570.06		619.961		590.566	1194.32	1430.56					1898.11	3721.99	1229.43	1437.47	1744.36	1772.17	1180.66	1801.08	3249.51	427.492	525.4	868.554
P35221	CTNA1_HUMAN	Catenin alpha-1	CTNNA1	88	2583.17	7970.08	18517.9	17552.4	37093.4	51984.8	102110	190343	161320	155229	23175.7	171975	180250	193500	210187	81185.1	66236.7	107881	92786.7	85012	87056.2	31622.9	173187	172085	181170	176283	174964	154282	249299	118629	121926	76001.4	1915.83	143790	135279	151095	124397	133642	252924	81021.4	80492.3	81538.5	70429.8	72996.4	89313.7
P48643	TCPE_HUMAN	T-complex protein 1 subunit epsilon	CCT5	131	235757	198912	229386	203199	188026	187750	272179	236724	161032	248223	174692	228783	273625	205655	246221	267270	204471	184412	263810	203779	230726	88876.4	240751	277179	288686	273223	268329	238978	243041	112970	93814	96269.9	123304	244923	191774	206206	128846	122286	176059	100202	81335.2	96938.4	108713	133414	97739.4
P42126	ECI1_HUMAN	Enoyl-CoA delta isomerase 1, mitochondrial	ECI1	22	100692	89511.8	60144.5	41818.9	13063.8	7623.45	22606	19178.8	15115.9	18436.9	9028.86	18087.7	28712.9	22152.8	19668.4	21225.3	46576.3	28722.4	34073	37743	31316.4	1055.39	24730.7	15874.4	20411	18312.4	10694.3	9638.73	12142.1	3837.59	3961.43	5212.34	1052.24	11254.9	12660.1	12980.8	34891.5	22316.6	61011.5	38058.2	45127.7	40384.8	35778.1	33192.7	30424.7
Q15365	PCBP1_HUMAN	Poly(rC)-binding protein 1	PCBP1	81	426973	430947	461365	313401	286606	267234	413095	327121	206210	298686	195664	305613	392400	310607	184579	239237	306714	352452	259355	337078	369298	175750	269925	287309	295618	245753	231451	266026	246041	241928	326221	248091	98030.1	420357	400312	246945	316054	323153	342956	349368	268352	284312	227390	393581	319104
Q9BTX7	TTPAL_HUMAN	Alpha-tocopherol transfer protein-like	TTPAL	9	1081.18	1184.96	1328.33		932.907					498.577			278.777		2017.83		803.623				343.83		1508.42					1010.97							24575.7								427.428		4122.6
P04798	CP1A1_HUMAN	Cytochrome P450 1A1	CYP1A1	14		104212				566.295	779.357	1365.83				4364.71				3519.98								2948.55	3760.85	350.285	85.4839	145.095	132.589						1703.18						6198.69			214.298	170.74
P55268	LAMB2_HUMAN	Laminin subunit beta-2	LAMB2	47	14364.7	14250.6	10067	50273.7	7768.73	8843.42	58038.8	15627.1	11160.9	14825.6	3382.32	11925.8	17147.2	7361.57	157068	8749.07	46630	5337.61	7625.3	18417.7	9357.35		53266.1	3411.73	8306.11	14010.4	56206.3	32801.6	30078.6	12167.1	31336.9	14738.4	264.174	23486	27594	30611.2	42490.8	57064.7	51351.3	44499	29190.8	44542.3	37765.3	43394.2	48858.5
Q92560	BAP1_HUMAN	Ubiquitin carboxyl-terminal hydrolase BAP1	BAP1	16		1168.05	475.718		463.441	6090.61		838.172			429.253	151.748	1329.63				1583.85	320.377	2387.92	315.062	1315.7		1344.28	286.211	914.837	1118.9		855.608						3126.35	987.48	337.009	4927.97	689.76	722.766	463.623	202.009	129.28	642.927	444.262
Q15025	TNIP1_HUMAN	TNFAIP3-interacting protein 1	TNIP1	24	13631	3191.76	823.334	1604.85	685.667	1015.65	3223.1	2126.84	480.827	932.602	497.17	636.036	5282.7	1517.48	434.979	1061.51	1240.73	6848.36	210.526	2436.06	1948.61	529.529	763.331	776.951	468.109	8741.44	17012.1	2315.88	2929.72	447.088		638.798	426.427	1242.76	1778.54	502.749	1049.57	3046.5	1824.72	4360.7	4182.09	7827.71	5161.84	2291.79	2883.38
P51531	SMCA2_HUMAN	Probable global transcription activator SNF2L2	SMARCA2	61	40686	20421.2	29816.8	16485.7	8767.69	7802.39	21117.2	63671.1	41975.6	31454	7162.21	17820.2	73208	20591.5	30264.6	21373.5	16274.8	35274.1	87127.4	20030.3	36245.3	1688.1	22973.1	12809.8	20058.1	19171.3	23929	40008.2	23388.9	19135.7	17767.8	27230.8	31776.6	21737.5	17836.7	11173.3	30434.1	18390.3	31380	77103.2	34717.3	35115.2	51976.8	20817.2	45911.8
Q8WTW4	NPRL2_HUMAN	GATOR complex protein NPRL2	NPRL2	10	1693.24	8671.23					765.841	283.304				198.942	875.039	4071.97	205.367	3350.04									112.256		335.12								1789.99	1436.68						1164.76	9164.34		879.217
Q9H074	PAIP1_HUMAN	Polyadenylate-binding protein-interacting protein 1	PAIP1	26	1716.48	23665.4	3050.94	2432.59	17380.8	13725.6	25116	19711.7	14117.6	17895	1959.72	23673.9	20066.9	14733.8	101365	20414.7	12629.9	22606.5	14737.3	12322.7	24226.7	1029.77	31581.7	13202.8	12817.3	12215.7	16238.5	15453.2	16163.1	11117.8	11675.2	11624.9		28880.3	21176.8	15684.3	11417.1	11298.7	31709.2	18815	20260.2	19587.9	11627.7	12050.9	26368.2
Q7Z406	MYH14_HUMAN	Myosin-14	MYH14	58	101410	125221	123556	76582.6	42472.2	75438.5	57201.9	79160.9	47267	50093.3	10817	43431.5	73965.3	68212.3	50085.9	46774.5	73444.7	60872.3	58867.1	69804.1	79922.6	17575.9	64987.3	97159.2	113512	57159.5	45064.3	33489.8	43865.7	13461.5	35535.8	34585	41943.9	94366.2	39726.9	28269.2	42760.4	36880.9	55545.7	30020.4	34961	57661.9	42129.8	24607.1	24105.8
P16401	H15_HUMAN	Histone H1.5	H1-5	27	57132.1	47395.1	54233	31830.1	52597.2	68268.3	229494	174430	204571	67676	10590.4	64356.5	67926.8	56088.7	58587.3	100619	206930	185905	266573	94726	95757.1	4991.85	96303.4	165925	244634	179136	73762.2	49256.4	79112.9	137461	89232.2	82184.2	31725.2	33367.2	36029.8	56722.9	90687.7	133972	113365	94866.7	225911	216040	165517	15663	8679.17
P42858	HD_HUMAN	Huntingtin	HTT	70	18052.1	48960	41657.2	50947.3	14092.7	82552.3	46089.5	36710.5	33066.8	14106.3	2328.13	32319.3	34078.4	34007.9	32145.4	2040.04	27354	35763.7	17031.5	29522.4	33016.2	4108.2	47755.8	42634	45768.8	36690.2	28281.1	31962.5	30075	3984.17	17421	21733.8	24529	17531.5	27111.5	38660.7	36851.8	4163.11	48169.1	9155.59	1587.45	15587	4163.04	13566.6	5418.31
P43630	KI3L2_HUMAN	Killer cell immunoglobulin-like receptor 3DL2	KIR3DL2	6					119.554				244.584		1517.89	6807.32							814.987			1041.74	9404.23		251.048				118.571			4849.38	1122.9	469.002				200.087						523.42	246.062
Q16563	SYPL1_HUMAN	Synaptophysin-like protein 1	SYPL1	7	10939.9	9462.35	12579.1				3184.76		6348.11		847.206						987.222	413.578	1208.36	9159.57	14307.1		4952.93	2732.49			1538.47	637.931		940.265	2597.5	2964.08		1535.14	29.8199	3732.72	2168.47	3080.43	2143.07	541.867	490.295		145.321	94.7456	418.333
O60583	CCNT2_HUMAN	Cyclin-T2	CCNT2	10		108.498	878.754	686.985		5796.47				1035.31		239.117		2382.15	2025.42	1562.94		2137.07	1263.37	447.523		2710.04	1214.06	931.597	16343.6	772.655	2562.88	646.851		414.728	2633.78		3273.04	508.207	1287.88	605.539		130.308	714.318	2559.19	2567.59	2854.36	11491.6	3049.62
P51991	ROA3_HUMAN	Heterogeneous nuclear ribonucleoprotein A3	HNRNPA3	75	222493	201319	229664	291795	165764	170057	408113	396361	365213	320978	149197	371674	398549	462051	355733	377438	281194	267641	303254	279465	360948	133008	368020	406582	319571	440125	258157	246607	255830	240597	211308	230188	129930	268560	321008	302480	177251	202632	209240	216400	192836	181944	151737	158160	153330
Q49AM1	MTEF2_HUMAN	Transcription termination factor 2, mitochondrial	MTERF2	9			3629.6	429.172	344.477		1363.21	80.0474	89.386				867.242		848.406			736.964	5967.28		2028.34		2602.82		2985.84			1320.44	1669.55	1394.85			17915.4	384.373			4256.73	620.969	2748.72		519.793		246.06	404.557
O15235	RT12_HUMAN	28S ribosomal protein S12, mitochondrial	MRPS12	8	2714.33		805.351	4817.99	5645.9	5139.52	4652.47	4421.05	12427.8	2415.17	13868.9	2274.57	5677.43	1423.8	5049.19	2895.94	517.821	1807.72	1747.72	6067.68	2203.32	2388.33	2016.88	6115.56	1963.01	6694.5	5990.56	5807.78	3048.93	6475.82	3748.16	3381.44	2424.71	2808.08	3162.26	3219.55	4022.85	11964.5	8390.67	3208.52	4557.52	3417.15	1001.09	751.674	767.109
Q92667	AKAP1_HUMAN	A-kinase anchor protein 1, mitochondrial	AKAP1	39	7013.07	5516.63	9827.47	5187.63	6176.38	3684.04	3818.73	12997.6	2020.75	2737.81	1675	15686.8	1975.68	1824.43	689.302	456.25	2963.22	4411.58	2587.4	21610.7	142937	2725.95	17742.1	3446.2	20672.4	28441.6	11842.3	13692.8	226380	3396.59	5098.52	22986.3	3965.45	2058.76	7498.08	3945.33	25111.9	3830.6	31928.5	10655.8	5680.66	5903.75	4835.64	4631.98	3146.22
O95486	SC24A_HUMAN	Protein transport protein Sec24A	SEC24A	34	63084	56250	24100.2	35014.8	33131.7	31117.9	2037.19	15969.8	4001.64	11129.4	6626.3	9716.82	5156.43	4751.89	10035	9775.44	5064.35	75623.4	5143.24	5656.38	5361.14	28340.8	17968.1	7011.66	5238.65	29762.5	7010.3	5318.51	7423.41	10852.6	26474.9	10110.6	28978.9	7416.32	4243.29	8670.92	6813.75	56800.2	6564.1	6078.49	5545.43	3851.69	5728.59	5601.62	3252.65
P37108	SRP14_HUMAN	Signal recognition particle 14 kDa protein	SRP14	30	18748.3	62241.9	61740.2	42001.6	47010	73725.3	113622	97898.1	93303.9	104047	255.284	99478.1	100787	78393	81898	79278.3	73419.7	72405.9	76447.6	81914.2	97522.5	1304.35	94496	88428.8	93706.8	93988.1	139694	144407	143471	4385.55	5559.12	3812.57	2127.3	15759.6	112084	111514	44958.9	17209.1	46254.7	7786.78	10418	13387.2	22050.9	21374.6	13358.7
O15527	OGG1_HUMAN	N-glycosylase/DNA lyase	OGG1	8					5057.26				487.268		3597.28	2327.27		392.965		347.316			362.214	112.965	2074.59			108.578			741.459					2380.93							773.442					121.629
Q13503	MED21_HUMAN	Mediator of RNA polymerase II transcription subunit 21	MED21	6	3302	2794.32	1803.92	1323.96	1298.67	286.163	1231.3	779.725	833.117	343.124	628.612	452.071	257.061	117.15	324.351		394.51	854.259	528.245	418.927	3149.16	1288.27	524.429	4768.4	798.408	5696.09	517.99	3173.83	641.625	687.218	8188.25	904.017	999.472	490.863	711.736	707.84	1247.16	1810.21	2134.57	1519.6	2397.64	1358.82	1299.95	1434.8	1307.32
Q86U86	PB1_HUMAN	Protein polybromo-1	PBRM1	57	34354.6	17584.4	3329.68	3519.31	5886.52	1215.26	11964.8	14548.2	8445.06	4268.24	6608.49	8247.25	7077.99	6611.73	12136	23492.6	9776.49	7386.14	7885.51	34762.6	39996.7	35752	19885.6	80882.8	17157.5	14756.3	47543.1	8123.28	18361.1	7433.84	4955.35	6194.91	18734.3	6854.59	6565.32	7870.52	19845.8	17059.4	5108.68	6735.62	6662.1	16396.9	8978.41	12583.8	11549.4
P56270	MAZ_HUMAN	Myc-associated zinc finger protein	MAZ	8	1757.23		745.486			233.92			1722.02	661.848	1541.86	442.455	678.915	262.402	579.587	1017.45		630.06	1203.94	663.931	1309.83		2417.18		573.214	1080.76	454.119							1298.79		1237.21		829.236	1571.82	396.661			5417.55		927.09
P35790	CHKA_HUMAN	Choline kinase alpha	CHKA	19	1489.9	2265.72	313.516	9087.85				212.045	30973.7	383.918	597.913	10206.3	33707.9	37689.9		13496.8	1988.68	8848.09	7697.23		3117.4	1197.67	723.04	7462.23	744.597	47705.7	8600.4	7882.23		2012.44		2269.78	2358	1022.87	2540.56	3176.25	3282.06	6500.06	3604.66	8616.08	465.063	1865.06	3334.28	39946.2	1294.16
Q969L4	LSM10_HUMAN	U7 snRNA-associated Sm-like protein LSm10	LSM10	2	3103.62	2681.62	1479.82	2168.7	810.25	1968.02	3960.18		3782.8		1986.44	4817.75		3579.86			4359.62		4416.47		559.95			4884.01							95.1415						590.282	1566.35	6880.23	366.984	564.153	1675.91		367.774
Q9P2P6	STAR9_HUMAN	StAR-related lipid transfer protein 9	STARD9	5	2385.27	1869.86	2684.33		755.303		518.704	1286.59	1445.23	1070.64		1228.35	951.997	995.126	947.619	1002.36	1135.7	404.113	1097.65	3862.21	1177.85		6797.49	424.206	1005.25	628.502		1652.96	781.875	490.959	314.053	452.205		1094.11	3806.13	912.256	1918.6	1822.49	3286.26	1753.63	1288.95	1625.71	1889.88	1488.09	7696.52
P27361	MK03_HUMAN	Mitogen-activated protein kinase 3	MAPK3	34	10641.7	11613.2	11445.4	48617.1	46997.2	6476.62	29050.2	62386.4	22507.3	43716.1	24179.6	23425.4	19606.8	16868.6	49742.5	21855.3	18361.4	33644.7	35099.8	55705.6	11282.1	24928	12787.4	33919.9	10370.6	56837.6	13683.2	22511	13017.5	15096.5	20110.5	8525.13	22341	55400.4	9967.5	13291.2	10792	20340	24524.7	24503.3	22467.6	25714.1	19444.1	25226.4	20815
Q03167	TGBR3_HUMAN	Transforming growth factor beta receptor type 3	TGFBR3	12					1149.21		54.9934	4525.67			11286.5	193.271	81.4128	1058.38	1552.36		75.0248	577.965	2535.11			236.932		3620.22		21932.4			203.069		167.308	394.747		1959.98	2905.44		596.71	2555.09		3878.34	1059.41	9659.62	6072.62	1244.97
Q9NRM6	I17RB_HUMAN	Interleukin-17 receptor B	IL17RB	3	1409.68			3824.27	4766.06	3424.56	1677.28	981.087	548.354	906.379	2411.43	538.323	1097.82	815.271	803.808	907.445	2294.86	2142.46	2047.95	1766.91	1865.93	6896.58	2007.6	3529.63		3902.39	1460.77	1837.19	1780.69	1965.22	1786.12	1584.16	6158.01	1094.39	2056.59	1670.61	8319.81	8471.3	8414.61	8434.83	8102.39	7835.25	5937.68	7167.29	7295.19
Q9H9L3	I20L2_HUMAN	Interferon-stimulated 20 kDa exonuclease-like 2	ISG20L2	17	5239.96	3620.19	1306.74		2622.95	1849.71	3908.32	6774.31	5239.51	5637.9		4133.89	4545.59	4088.28	3787.69	5687.69	5261.27	3722.08	6807.49	4020.74	6353.73	2915.63	6477.36	7374.82	3790.88	6905.53	1258.85	2100.57	1103.11	9092.64				744.575	771.859	1198.41	867.78	6605.3	1326.41	677.404	402.726	900.097	3019.59	986.568	205.184
Q9Y3B2	EXOS1_HUMAN	Exosome complex component CSL4	EXOSC1	9	5108.57	5100.68	3908.63	1428.44	1610.09	1794.2	9637.1	7219.71	5221.28	4735.95	28369	16782.3	8635.77	9882.84	4157.69	7459.5	10330.3	3498.97	13356.9	5340.05	6875.48	2646.47	6711.42	7949.08	10500.2	9553.36	5656.5	8685.63	7801.75	4796.46	4178.54	3582.98		6670.09	7430.57	9010.41	6209.39	5913.27	10267.8	6621.52	6541.03	9518.4	4880.18	8386.42	7386.16
Q13615	MTMR3_HUMAN	Myotubularin-related protein 3	MTMR3	21			583.114	4169.93				8865.8		3475.15	884.758		1338.31					2555.02	3100.17	297.288	2398.64	1099.05	2448.07	899.756	1820.07		1691.54	399.592			2782.19	1264.64	201.699		1513.62			494.384		1252.11			125.766	1126.22	1927.07
Q8TCT9	HM13_HUMAN	Minor histocompatibility antigen H13	HM13	13	63153	62330.6	37265.4	58268.3	63428.4	66886.9	6148.98	13260.3	5282.44	4398.71	24127.2	6068.03	4967.33	26073.8	7329.28	2651.94	32471.1	3709.77	9616.36	11745.7	19032.3	38281.6	11497.4	4062.03	9503.17	9363.69	21132.3	21424.3	19574.6	11785.8	10094.4	9415.32	41560.1	10042	45088.9	53672.7	26391.7	35700.7	31626.4	40841.5	73601.9	56236	37683.5	42978.8	47045.6
Q9NRG7	D39U1_HUMAN	Epimerase family protein SDR39U1	SDR39U1	11	4538.14	2817.46	3881.65	4603.71	6342.23	6258.06	735.604	2073.95	1331.02	811.88		4323.64	942.561	280.666	816.897	16627.8			690.958	10978.1	2711.68	2002.14	4658.53		1301.51	1325.22	2779.21	1824.87	27040.2	271.309	506.589	591.589	2069.32	1587.61	21114.4	25792.9	756.629	659.104	1249.98	1642.47	1546.44	989.205	540.443	894.569	589.337
P14866	HNRPL_HUMAN	Heterogeneous nuclear ribonucleoprotein L	HNRNPL	73	377317	429373	373286	106141	109922	238607	342422	384436	345874	379774	52978.3	305307	363568	304823	337927	397276	333548	312032	311938	325079	335372	85969.6	296866	358976	364856	383789	284153	264264	281931	266783	216682	209245	97442.7	202517	254413	193803	285571	291295	296376	270652	229171	232479	254105	256594	209847
Q9H582	ZN644_HUMAN	Zinc finger protein 644	ZNF644	31	4881.11	1519.41	2622.15		113967		9422.86	864.671	82605.9	800.664	141.994	3692.76	54351.2	3839.65	8442.29	4273.62	161.362	59211.9	40389.2	10688.5	3202.88		499.927	64936.7			83973.7	69142	75196.7	1206.58	4005.46			303.356	59894.3	239.217	3690.65	6324.68	4334.61	1612.68	7407.89	5115.44	17043.5	7640.84
P17535	JUND_HUMAN	Transcription factor jun-D	JUND	12	1660.09	1070.77		1334.78		843.788	3921.37	2489.7	2968.76	1539.49	1419	4571.08	4065.98	3298.34	2272.61	5475.02	2915.93	3167.21	3783.47	6351.51	3137.22	993.88	6296.29	3558.66	12326.2	9569.34	3454.79	4752.7	4998.16	2217.69	2033.74	1794.64	1995.43	2037.72	2498.81	2234.46	1591.18	2973.58	2814.55	3348.07	4394.54	1417.51	3494.27	4279.25	3766.17
Q9C098	DCLK3_HUMAN	Serine/threonine-protein kinase DCLK3	DCLK3	3														769.306						833.748			771.972	680.492							200.665						551.341		1533.89		970.675
Q9BUL9	RPP25_HUMAN	Ribonuclease P protein subunit p25	RPP25	11	7484.83		1135.62	796.04			237.845	167.366	8827.24	432.013		734.237		1111.98	1241.7	979.269	1407.43	666.136	1581.74	2546.87	3357.08	2160.09	3400.26	2479.62	3243.55	4251.4	3342.95	1961.74	3270.9	3510.69	2894.46	2231.86		2548.62	2280.68	23140.9	4095.09	3342.21	4596.42		1194.46	730.558	1399.62		861.649
Q9NZQ3	SPN90_HUMAN	NCK-interacting protein with SH3 domain	NCKIPSD	22			1998.12	2003.57	340.699	13217	968.64	2376.05	4072.96	2322.46	3365.05	2586.16	771.35	1651.31	540.2	995.737	439.859	620.25	3606.89	4459.45	1913.44		2182.79	1262.04	2801.34	1559.78	1402.55	1445.5	1444.44	128.436	923.837	5157.91		5621.4	1644.83	1434.21	3332.01	2751.45	3623.24	6434.74	1413.69	1293.28	2111.92	2658.46	3254.82
Q13671	RIN1_HUMAN	Ras and Rab interactor 1	RIN1	29	891.372	6684.37	6025.74	5543.19	6494.4	17718.9	7510.64	1265.43	4267.38	2106.7	4398.04	2602.78	3846.75	1235.95	1217.47	6944.06	4962.7	3109.13	5228.62	1887.22	6083.87	3834.31	4904.62	11686.6	9559.72	8242.7	5826.69	5156.76	5763.91	1802.89	5192.08	4324.3	2476.3	3457.77	3981.6	5499.83	2359.04	35668.4	1447	2246.69	6048.54	8987.38	3054.15	6771.71	6560.69
Q9NS37	ZHANG_HUMAN	CREB/ATF bZIP transcription factor	CREBZF	3	2388.17	5923.58	2534.88				2588.29	2558.95	2744.8	2954.05		4426.75	4399.42	2630.61	2026.82	3564.32	3000.39	2226.08	2563.24	3881.14	5493.97		4798.4	3502.09	22886.3	3400.38	3873.3	4281.76	4322.06		839.855	553.762		2568.95	2490.37	2180.51	3778.61	3619.98	4562.49	1012.2	14789.6	712.013	3047.02	2884.94	2561.01
Q86TX2	ACOT1_HUMAN	Acyl-coenzyme A thioesterase 1	ACOT1	27	2143	22185.9	4197.9	4086.22	2178.59	2328.93	10848.1	16910.5	14289.8	16892.4		16311.9	14565.4	13752.9	10343.4	11947.8	6636.1	9993.59	6968.45	10127.3	16205.4	17255.9	11907.6	10308.8	14197.8	16843.6	6118.52	4442.81	11071.1	7243.98	3384.78	2924.34		4830.5	5499.59	3547.99	6329.81	5193.33	12604.2	12266.8	7453.41	7220.76	5546.05	6427.99	5301.01
B2RPK0	HGB1A_HUMAN	Putative high mobility group protein B1-like 1	HMGB1P1	23	15098.8	19721.2	31319.6	1390.37	25830.2	2123.42	95650.7	95641.5	72784.9	150953	4039.67	140609	244306	132346	89674	101474	71209.8	67254.2	82193.8	105338	116532	602.932	91110.7	59287.2	159742	85876.6	53193.8	93347.8	69346.8	21598.8	13942	16255.4	10759	60838.8	52136.3	45895.3	37194.8	36965.1	43509.6	10342.8	12860.9	9838.11	60185.4	31239.7	36921.1
Q9P1Y6	PHRF1_HUMAN	PHD and RING finger domain-containing protein 1	PHRF1	15	2067.26	577.695	140.254	18908	1745.8			11012.1			1349.87	83.7258			379.635		237.782	83.6204		2191.87	1601.92	71.7595		6831.51	3790.63	554.386		11519.9		632.414	219.177		754.3		5658.09	9062.91	1187.76	1190.8	1663.56	4109.52	718.985	1036.57	1234.89	5962.58	590.566
Q4V348	Z658B_HUMAN	Zinc finger protein 658B	ZNF658B	4	833.201	329.443																					982.335															396.406	255.905			124.127		1342.66
O96033	MOC2A_HUMAN	Molybdopterin synthase sulfur carrier subunit	MOCS2	3		1781.76		1652.46	1734.46	2293.29	378.644	2383.87	175.928	350.068		784.228	657.935				17710.7		125.742		971.403						206.657		1190.29					679.986	698.582	735.307							8350.7	94.7745
P31937	3HIDH_HUMAN	3-hydroxyisobutyrate dehydrogenase, mitochondrial	HIBADH	23	38870.2	53691.1	36025.2	17973.1	62053.2	20263.4	12252	14703	11477.5	8936.74	12309.4	9238.02	7908.84	9093.46	10544.6	5705.66	13552.3	80297.8	11044.5	9151.27	13939.6	13870.2	8103.87	11595.7	26098.6	18760	30206.3	35611.3	26865.1	11792.8	10473.6	12373.5	14224.7	26138.6	22623.6	17683.3	24670.9	27380.1	50603.2	45770.2	31469.9	31519.7	25004.2	28702.6	45454.2
Q3ZAQ7	VMA21_HUMAN	Vacuolar ATPase assembly integral membrane protein VMA21	VMA21	2		17081.3		4580.75					7391.06	1378.58							7329.1	8736.13	9685.07	8555.39			12420.9											10301.3		8202.74	22029.2	23684.8	25171.4	13694.6	14422.9	15048.7	16733.3	15935.8	16811.7
Q687X5	STEA4_HUMAN	Metalloreductase STEAP4	STEAP4	12	11662.5	28306.4	327.328	20204.7	509.819	2469.97	2944.21	3403.97	2159.49	4015.5	5954.53	1482.22	1987.75	9907.01	329.781	168.614	3128.47	731.686	4038.17	3890.58	3393.21		2278.82	5395.63	2885.48	2442.35	946.097	4022.38	4454.84	2289.28	7223	1020.6			754.182	293.936	1148.96	542.038	1244.83	119.653	1053.21	1885.24	2161.8	3031.52	1771.72
Q93034	CUL5_HUMAN	Cullin-5	CUL5	48	127277	132528	118736	149271	127144	134416	14882.1	72020.6	10093.7	53324.4	9011.77	12410.9	11174.6	16134.9	6488.51	6909.29	14765.5	7362.94	12951.6	53046.6	21619.8	1056.55	25807.2	20093.9	13078.8	10758.5	9616.03	5987.11	19670.1	3495.22	3067.7	3113.81	20324.6	4168.38	30842.6	35672.9	8749.43	14632.1	18945.4	29109.7	5974.47	31197.6	19197.6	101181	76871.1
Q96MU7	YTDC1_HUMAN	YTH domain-containing protein 1	YTHDC1	18	8386.97	31021.7	8997.47	275.98	16189.3	14554.7	4259.81	5694.95	4167.46	1856.23	768.457	4377.55	15210.1	4240.37	3249.24	4505.21	12581.4	9338.35	9138.63	5713.07	7912.7		11481.3	19731.8	7250.31	31426.1	6480.52	14485.7	8605.27	354.154	318.847	295.309	7147.81	7016.71	11402.4	3397.81	10891.7	17457.3	16110.7	3942.96	3543.83	6415.74	8995.9	7995.11	9432.66
P13995	MTDC_HUMAN	Bifunctional methylenetetrahydrofolate dehydrogenase/cyclohydrolase, mitochondrial	MTHFD2	29	34006.9	29841.1	25324	28658	34997.6	31390.1	172895	18923	19532.1	16907.5	161.216	226582	249529	132061	183261	170053	171378	17579.1	190958	16226.4	239063	1848.36	222624	20552.6	16365.7	183717	3933.41	120188	8438.68	4183.2	2667.25	5253.47	19952.1	2701.97	12671	25726.1	17262.3	15817	22304	23893.4	29006.4	30267.9	22673.4	28973	25702.2
Q6V1X1	DPP8_HUMAN	Dipeptidyl peptidase 8	DPP8	17		439.88	2022.88	1349.09		26245.6		557.054	1835.75	506.278	1787.13	195.385	1050.3	472.149	1094.01	1079.42	547.016	1507.27		977.8		1942.34	2866.34	539.557	3255.56	1745.58		403.897	3273.16			388.433		234.03	991.918	150.086	1345.97					1508.86	1321.69	2357.49	244.616
Q9BZE2	PUS3_HUMAN	tRNA pseudouridine(38/39) synthase	PUS3	18	6587.7	5600.31	8930.07	16577.3	549.398	3323.7	14006.3	12858.8	13628.1	12131.6	25984.7	12439.3	541.6	14902.5	15113.5	950.02	15222.2			13025.2	7566.71		395.342	1359.12	2527.42	1190.48	3113.24	3159.14	365.021	17511	412.231	23206.6		3018.17	213.843	8324.49	2347.78	1179	1982.11	25652.4	639.385	849.309	8238.9	618.372
Q2PPJ7	RGPA2_HUMAN	Ral GTPase-activating protein subunit alpha-2	RALGAPA2	29	362.266		8655.77	4266.97	2550.91	7693.38	10286.7	4081.68	5563.93	61964.3	2212.82	7358.93	40908.8	13225.8	135.735	4173.44		2191.87	313.243	5149.67	5530.9	2839.04	86028.4	17297.5	28085.6	1777.35	20893.9	34577.3	14371.9			1880.23		969.374	11218.4	12293.9		321.749	435.511	361.058	1915.61		300.568
P13647	K2C5_HUMAN	Keratin, type II cytoskeletal 5	KRT5	50	221937	148877	212699	283597	295503	234680	143495	203469	209303	191006	52081.7	223580	205408	210568	206300	209902	131626	218164	178828	222974	198504	480425	76225.4	234048	232793	229252	99635.7	83300.8	97838.4	215299	181940	204532	89755.1	45277.7	59052	58468	268630	290734	55500.1	43142	39172.1	33986	275998	282503	264728
P26583	HMGB2_HUMAN	High mobility group protein B2	HMGB2	35	4651.66	5754.77	3028.46	407.902	24459.7	781.74	44551.8	33603.9	32000.3	64520.2	2085.55	78992.7	89461.5	53767.8	36417.1	27528.1	36443.8	28390.6	33454.5	30335.4	45559.9	2017.2	29912.8	25928.1	113398	28482.4	14363.3	56453	14823.1	10279.7	5828.22	41440.2	66.8151	41425.4	36538.5	31281.2	14887.1	11001.6	25563.3	3554.9	3447.16	4801.68	11250.9	9362.31	10722.5
Q9NW61	PKHJ1_HUMAN	Pleckstrin homology domain-containing family J member 1	PLEKHJ1	8			962.25	252.565		196.453						564.221	1670.93				348.422				296.796		580.871	169.796								183.538		1183.2	2480.67		823.259		361.662		959.751
Q9UHK6	AMACR_HUMAN	Alpha-methylacyl-CoA racemase	AMACR	11	35227.8	33982.2	4681.74	1486.2	3281.89	1126.46	345.107	1285.18	1326.88	809.914		310.503	1884.08				19428.8	2287.72	5681.48	2179.83	611.951		2754.95	3800.07	935.716	1512.89		269.579	97.0305		2381.32			14388.1			104.275		202.107	556.613	428.565	191.44	210.745	254.834	881.998
Q9BW61	DDA1_HUMAN	DET1- and DDB1-associated protein 1	DDA1	9	1118.65	20608.9	835.787	3400.32	500.734	382.093	2857.96	2212.07	1252.96	3197.04	367.957	5947.76	2578.05	741.384	1217.05	11531	1540.38	4292.68	2680.67	1602.94	22556.5	544.433	3074.52	2507.69	2810.56	31639.5	3917.87	14320.6	6103.57	1001.95	888.011	925.429		4305.29	2543.18	1717.34	4031.16	4154.02	3643.47	5197.66	5603.21	4761.05	3808.7	3677.14	8217.95
Q9UBQ7	GRHPR_HUMAN	Glyoxylate reductase/hydroxypyruvate reductase	GRHPR	39	46561.8	40003.4	31884.6	25335.5	20550.3	43163	17730.4	20205.4	22907.7	16903.5	24708.3	23565.9	19306.3	12699.9	13855.6	74680.8	25019.4	19728.4	32283.2	25513	33675.8	33698.5	22031.5	22447	33267.4	14133.7	24782.2	13469.1	26943.1	9961.76	27747.2	33306.2	51751.2	14672.6	17764.5	19624.3	20680.1	28646	14863.3	5407.32	7845.03	22434.4	8189.86	12705.8	8009.35
Q86Y39	NDUAB_HUMAN	NADH dehydrogenase [ubiquinone] 1 alpha subcomplex subunit 11	NDUFA11	8	11844.7	11164.4	9433.9				962.644	1564.67		706.264	212.431		1039.64	27125.2	2002.22	23764.5	2925.79	22817.3	1232.41	4829.47	8823.7	737.693	10129.1	3823.82	3956.11	2399.03	383.735	394.325	29637.7	611.548	1097.96		1182.9	31461.1	1859.94	1006.42	1523.83	1591.18	2442.97	923.252	671.764	9592.42		786.255	8316.69
Q5VWQ8	DAB2P_HUMAN	Disabled homolog 2-interacting protein	DAB2IP	31	1271.72	20898.3	6408.09	7171.09	4608.45	1394.16	6340.66	1306.67	2477.38	6534.89	3128.07	552.432	3537.07	3287.96	2417.76	5754.08	3242.47	4701.55	207.769	366.291	1049.3	309.137	249.923	4239.07	14890.3	42760.9	13887.5	6042.66	7054.12	343963	546.477	1305.38	1232.88	24396	6540.56	13638	31939.3	27796.4	1633.75	6448.77	2426.63	1933.46	801.173	1139.2	9371.34
Q8TC05	MDM1_HUMAN	Nuclear protein MDM1	MDM1	7		570.326	1336.29			1093.68			1543.2					441.978		100.326				591.992				358.507	732.92	359.379	10284	585.683	68.3067																1925.43
Q8NE35	CPEB3_HUMAN	Cytoplasmic polyadenylation element-binding protein 3	CPEB3	14	1489.65							454.933					680.138		801.605	970.859	1219.79	269.394	1893.12	96.4201				2532.69	1479.52	1836.35	1518.58	1771.29	2573.38						62182	1694.63	1714.05	1269.11	1576.02	777.09	700.672	59.6853	250.78	1092.13	547.927
O15078	CE290_HUMAN	Centrosomal protein of 290 kDa	CEP290	95	45875.5	34579.3	21659.1	75814.4	290.917	2224.07	123990	99438.8	7989.9	55709.5	19423.5	85894.8	77609.1	75850.2	32523.1	41321.2	7628.74	75397.2	39126.5	82523.2	12851.1	32530.9	70368.6	116804	14754	91617.2	98186.3	15491.8	102889	92507.4	98470.4	98127.6	24613.8	3314.77	100075	101383	5802.27	22728	19820.1	130624	130850	41879.3	18999.5	56528.9	18191.1
Q8IWT6	LRC8A_HUMAN	Volume-regulated anion channel subunit LRRC8A	LRRC8A	35	7309.13	8350.68	7527.2	1798.09	787.257	2766.39	36024.6	33434.5	6042.25	34649.4	1235.45	10503	7370.32	36418.3	34794.2	20634.1	22699.8	28195.3	28245.8	3028.95	3155.48		33551.2	42263.2	40469.6	46471	71074.6	98728.4	70008.4	74743.5	102476	2919.36	309.858	67399.5	77215.6	80956.4	88657.8	85419.3	99096.1	101742	104597	103807	84824.7	81688.2	80515
Q9H6A0	DEN2D_HUMAN	DENN domain-containing protein 2D	DENND2D	10	3004.44	3867.36	3892.95				422.94	712.627		1072.66		643.015			1642.15	448.689	940.013	400.712	1513.21	684.855			570.803			306.127		187.842						682.984		438.988		606.978	200.838			2104.06	529.753	202.803	733.855
Q8NCM8	DYHC2_HUMAN	Cytoplasmic dynein 2 heavy chain 1	DYNC2H1	73	1242.08	10273	14379.3	11443.5	9936.98	2606.57	3080.59	6763.7	4587.72	12017.3	29513.8	91225.4	5187.58	5758.64	961.9	5721.66	98959.3	44535.9	18140.1	22636.5	449.003	7669.04	2962.47	37529.9	32716.8	32999.6	13350.8	619.869		2028.48	3685.15	9788.52	3640.3	73494.2	4979.96	1175.2	57171.3	1932.83	81130.4	13826	19139.2	13736.9	19685.3	30833.6	24811.4
O43719	HTSF1_HUMAN	HIV Tat-specific factor 1	HTATSF1	37	4570.68	5464.91	3506.2	16794.9	1201.97	16934.8	40665.9	17411.8	13713.6	11118.8	2445.55	8058.66	13442.3	17272.1	10005	20219.7	9499.06	12764	6242.84	10928.5	31621.7	8239.73	13949.2	10411.3	10902.9	17970.9	6755.7	11915	32879.1	11499	11533	22892.1	3665.77	13756.4	9387.7	15839.5	9406.68	9869.15	8899.39	9068.45	25326.8	12857.1	18872.2	5966.63	16144.5
O95399	UTS2_HUMAN	Urotensin-2	UTS2	3	4096.47	3911.4	4185.3	3823.48	55856.2	58331.8	28909.6	737.379	36313.9	30605.1	67168.3	34307.9	40942.4	47762.4	45654.4	49222	43569.3	47181.1	32117.6	47995.6	39456.8	126150	30058.4	20854.8	26318.1	16470.8	28836.5	791.25	21376.6	69998.6	70857.3	71778.4	213.573	62358	51819.1	48207.9	55259.9	55887.7	30071.9	73509.1	63759.1	76301.2	59430.4	53755.1	54490.8
Q96CD0	FBXL8_HUMAN	F-box/LRR-repeat protein 8	FBXL8	8	3260.72	3014.65	2071.09	945.367	3237.14	962.072	1208.86		113.142	1652.23		4478.64	4603.52		623.72	268.701	195.438	697.515	1799.32		140.361	1117.18	234.495	218.735	2521.87			74.4405		379.75	178.862	209.371				4330.45		9058.44			1147.17			107984
O75122	CLAP2_HUMAN	CLIP-associating protein 2	CLASP2	53	8876.57	10141.5	20599.8	38398	5712.12	82292.4	13508	15550	12441.9	9953.18	8711.14	13971.6	68184	20463.4	9848.41	13419	21894.4	12288.3	26639.6	10626.7	12517.3	1965.36	14580.2	13787.6	17272.4	15419.2	11142.4	12821.6	14126	5800.06	13154.3	12333.3	8044.22	22769.7	14106.3	17453.2	42676.3	18695.8	22134.1	18351.7	17489.7	25637.3	21454.1	20025.5	13790.8
O95707	RPP29_HUMAN	Ribonuclease P protein subunit p29	POP4	8	1452.43	1555.66	1558.85	1478.94	1327.66	1178.32	8202.93	4846.51	12793.6	865.619	1217.76	4453.72	628.761	713.639	810.085	530.873	720.467	962.241	775.264	950.749	1133.08	1685.9	1093.54	1174.1	835.96	1259.29	486.523	586.648	512.831	2692.94	1120.97	2312.26	1743.73	1211.52	6497.75	605.397	1339.02	932.902	699.874	1116.37	969.804	1055.27	378.472	751.285	375.632
O94979	SC31A_HUMAN	Protein transport protein Sec31A	SEC31A	79	47572.4	18495.2	20526.4	419.838	11783.5	389236	70323.6	46409.3	52332	40929.4	1702.09	32474.5	35988.9	44284.7	33304	22947.7	37369.1	40758	33503	52211.7	45600.5	3069.6	71372.1	39289.2	38362.2	39058.8	52360.1	53205.8	53022.6	28926.4	34500.8	36865.5	28051.7	37629.8	69287.6	136501	63128.4	66786.2	51988.5	41218.5	55063	48472.4	45998.6	44872.6	35736.9
P17568	NDUB7_HUMAN	NADH dehydrogenase [ubiquinone] 1 beta subcomplex subunit 7	NDUFB7	8	39854.8	42167.8	40258.7	12463.7	8142.72	16362.2	3568.17	3799.59	4394.02	2910.18	8094.06	3162.27	3252.33	4325.26	2982.3	3344.19	6831.58	3388.08	4743.14	6687.52	7729.06	7556.82	7460.75	7123.22	7621.51	7131.36	1999.23	2039.63	2013.78	4051.13	2055.79	1266.63	8747.39	491.633	1142.88	1705.5	7266.6	9373.55	9124.09	11242.7	11560.9	12336.7	118635	10279.1	10144.7
P19404	NDUV2_HUMAN	NADH dehydrogenase [ubiquinone] flavoprotein 2, mitochondrial	NDUFV2	20	80167	81482.3	85743.4	20309.8	18148.5	30761.4	11621.6	6383.66	14276.2	15763.7		8790.48	8215.99	6327.68	10180.9	11721.6	5738.98	6635.45	9884.45	7806.3	8181.2	1413.83	8177.53	4940.73	5519.41	6130.7	4263.64	3184.87	6324.09		47300.8	864.781	5580.11	3730.7	2633.01	5609.81	13394.7	14232.4	12122.7	5846.12	7173.04	7284.99	9406.46	8919.02	10477.8
Q15973	ZN124_HUMAN	Zinc finger protein 124	ZNF124	4		11719	1061.72		1517.86	1955.63						182.703		240.574				10427.3		412.904		1118.32					401.713	318.32	322.065				173.073	330.37	140.072					8065.97			7438.07
Q8IUG5	MY18B_HUMAN	Unconventional myosin-XVIIIb	MYO18B	4	5192.76	4792.28	5845.22	3750.63	14316.3	2071.56	44104.8	37027.7	38678	46031.7	1512.72	47757.1	50334	37000.3	42745.7	39016.7	46355.1	40492.7	43125.3	43543.2	45968	3563.63	47213.2	34960.9	35914.2	32238.1	34508.1	32501	34930.9	14858.7	13954.8	14188.8	3246.94	23348	22684.6	23192.5	54985.6	55045.2	51290.9	29723.5	29873.9	25522.1		48733.3	50856.2
Q9BTT6	LRRC1_HUMAN	Leucine-rich repeat-containing protein 1	LRRC1	21	18927.7	20216.5	17286	12904.6	557.085	1943.46	9051.06	1196.48	171.616	47.1688	3113.08	238.03	3263.2	1188.25	19738.3	3177.27	6666.39	4634.03	9976.43	297.984	1928.34		883.061	18919.6	4025.8	3035.95	209.304	227.691			16428.5	1977.49			4090.72		2849.35	11447.5	1052.85	6641.28	10782.1	1792.81	21771.7	4309.14	6578.85
Q6NUM6	TYW1B_HUMAN	S-adenosyl-L-methionine-dependent tRNA 4-demethylwyosine synthase TYW1B	TYW1B	15	19541.8	1663.72		608.693	4913.03	5281.22	843.147			319.29			362.08	21.2885		1315.27		616.492	2073.64	470.433	5112.53		709.45		4038.93		324.053	4331.65	5326.79			2947.69		2046.84	387.082			2073.04	202.444		1984.44			261.065
Q9BSJ2	GCP2_HUMAN	Gamma-tubulin complex component 2	TUBGCP2	53	23610.1	19499.6	18792.4	8181.94	2589.88	1305.56	85167.4	20532.8	12953.9	17834.7	1231.46	17450.1	17425.7	13723.6	45227.8	12452.4	15273.2	10994.6	25248.6	19342	16857.8	451.098	13218.9	11172.1	12977.8	18213.6	18787.3	11559.6	8115.14	2414.37	1042.37	2691.72	3991.68	3560.84	6281.09	51649.3	8620.26	9160.14	9361.82	5866.41	6007.23	103179	75312.2	17330.8	7513.26
Q96QZ7	MAGI1_HUMAN	Membrane-associated guanylate kinase, WW and PDZ domain-containing protein 1	MAGI1	4			2738.53				5604.26	10023.5	8602.21	6044.91	9656.95	8397.38	1513.54	4251.56	3155.4	5730.42	5557.25	3776.26	2323.33	3067.56	4549.83		3842.75	1028.44	1918.32	34086.6		304.872	1615.18							2205.61		3334.58							485.952
Q92828	COR2A_HUMAN	Coronin-2A	CORO2A	14	2280.9	3268.14	3035.78		1043.05	6351.66	345.883	13228.7	1463.38	1275.14	1950.53	1971.56	13141	1691.83	181.497	1703.95	321.323	1988.29	5126.26	462.541	847.142	495.36	1151.42	1934.29	665.326	799.021	3839.84	27750	10041	1108.99	1091.49	1397.91		1188.63	4338.21	850.411	1323.03	1101.03	7657.17		627.166	1742.33	1148.84	477.275	3594.49
Q9NX07	TSAP1_HUMAN	tRNA selenocysteine 1-associated protein 1	TRNAU1AP	8	17492.9	262.403	17870.9		1118.54		753.471	515.668	120.717	2525.07	2171.36	97518.4	305.163		736.17	539.744	79205.9	415.062	1023.79	983.18	621.045	6593.57	634.923	915.607	2032.84	1809.24	827.337	779.56	1866.94	808.675	123629	3411.62		114525	1404.75	115017	6367.13	3772.84	2162.79	2266.53	2061.33	1111.91	1163.37	1765.64	1598.54
Q15034	HERC3_HUMAN	Probable E3 ubiquitin-protein ligase HERC3	HERC3	10	649.312		559.24	355.131			3861.14		365.661						455.503		77.4972	1342.81	1151.33				556.02		207.42	387.431	1597.04	1232.96	1568.54						383.129	3920.95	2981.42	4153.84	2241.9	1042.41	671.638	3754.17	1606.23	2096.33	2634.5
Q8NF64	ZMIZ2_HUMAN	Zinc finger MIZ domain-containing protein 2	ZMIZ2	10	9013.45	439.22	408.627	2905.49			414.254			224.924			224.562		27651.4		579.052		12331	333.444	77723.8		181.7				99.4106	639.203		310.696	515.773	1015.54			553.572				127.157	180.837	406.964			1169.09
P35268	RL22_HUMAN	60S ribosomal protein L22	RPL22	23	84442.4	38069.5	77741.4	87326.7	137963	107494	209399	272637	88250.8	132134	329.68	91847.1	94234.6	8217.65	10462.5	24827.7	147133	169498	156530	80133.6	93676.9	21147.5	93893.6	195418	103586	198284	155872	68435.5	77826.3	65530.6	79245	207445		183297	88004	1268.71	63246.8	132933	147444	56128.7	133642	63645.7	60422.3	111996	111906
O95630	STABP_HUMAN	STAM-binding protein	STAMBP	19	1438.09	1705.88	55673.4	648.332	668.313	12663.3	824.22	2457.18	1720.29	815.686	2900.27	5122.91	1034.42	4292.48	4577.01	2314.68	2867.35	3867.91	935.837	1987.19	4942.95	5039.4	4663.06	5322.27	3190.4	9849.78	2937.39	1113.36	1296.53	1810.03	541.318	588.824	4081.6	959.909	833.266	926.259	182.818	2765.36	1033.63	1226.31	1168.16	1392.88	234.66	721.271	2257.71
O00442	RTCA_HUMAN	RNA 3-terminal phosphate cyclase	RTCA	14	13505.1	12242.4	9654.55	1363.87		928.575	875.476	660.462	426.164	7197.19		7881.47	1197.32		2597.01		2698.87	684.616	393.001		359.565	74454	299.163	693.97	418.569	583.852			741.469		363.764			3331.38			279.43	304.259	506.002	1703.38	286.346	674.671	1320.66
Q8NEG7	DEN6B_HUMAN	Protein DENND6B	DENND6B	5									397.279		199.997		644.087												945.763									1694.24	246.784			342.331				2288.66	163.355
P06744	G6PI_HUMAN	Glucose-6-phosphate isomerase	GPI	151	84955.6	72500.9	51054.3	55747.4	343708	32259.1	410223	449855	385665	415259	147666	391546	483985	302524	365722	370760	250454	242474	254229	253836	294861	138608	329036	382638	362925	317256	343337	348742	408634	172028	229181	235457	127923	444316	356475	379349	189576	200179	328664	99016.4	76741.9	259967	216331	120174	164624
Q9NYY8	FAKD2_HUMAN	FAST kinase domain-containing protein 2, mitochondrial	FASTKD2	36	7589.49	103210	8388.98	8633.52	4346.59	2043.81	4443.65	6081.06	646.87	24943.6	3423.98	28716.9	4757.58	6720.38	87.4837	14984	3965.56	4158.6	2170.43	9980.49	3337.65	11677.7	9237.67	9952.87	2281.3	2726.51	6019.27	20143	11599.1	542.932	1472.05	1326.34	271184	4481.19	7737.2	6331.04	35929.8	7503.42	7965.47	20334.2	18203.2	13114.1	10703.4	12335.3	12446.9
Q9H1X3	DJC25_HUMAN	DnaJ homolog subfamily C member 25	DNAJC25	6	9241.29	1144.9	975.776	347.271		282.587	734.231	7711.28	2448.6	4346.39		1798.66	1982.57	913.834		312.133				301.654		1505.03	1071.2		3303.58	1055.5	2797.64	3422.29	2848.55					981.519	2302.44	1511.63	4114.6	401.836	956.434	146.313
Q9H1K0	RBNS5_HUMAN	Rabenosyn-5	RBSN	23	180.524	2030.52	186.284		1202.64	1212.05	3469.46	980.679	550.188	2768.57		15119.1	7949.21	5930.06	11445.6	558.944	5514.21	924.001	2451.62	252.367	592.36	12660.3	1567.82	3941.03	2067.83	14058.1	640.931	10130.5	595.166	1046.94	274.71	498.575		562.546	1375.96	514.223	6938.54	4816.79	266.866	458.467	11927.2	13675.7	421.106	10458.9
P08579	RU2B_HUMAN	U2 small nuclear ribonucleoprotein B	SNRPB2	25	13985.5	6606.74	2897.32	7708.65	5747.16	9370.26	41462.5	40066.6	92483	35775.5	23790.4	41214.8	42957	44324.8	36510.6	43588.1	35822.2	32129.6	34370.8	35646.6	44545.6	18009.4	136758	39857.2	140431	40684.5	27390.8	134132	37522.5	43626.1	42140.9	29013.4	21891.4	50722.4	43452.1	58642.6	27203.6	28632.6	28908.8	26341.2	25731	26768.2	21574.1	22069.9	20258.6
P98082	DAB2_HUMAN	Disabled homolog 2	DAB2	33	16143.7	23109.5	31564.4	5781.97	8606.57	7418.93	34776.9	38948.4	34705.6	34191.7	15388.6	38531.4	24859.3	34285.4	35935.3	34649.5	22727	19780.4	24259.5	19671.7	18903.1	8182.12	26762.6	21835.5	30728.7	23847.9	14033.9	11884.7	11769.8	12057	7542.74	7617.57	5967.48	15011.8	56241.9	11884.6	1961.05	8606.93	2192.94	2269.74	2026.91	23040.7	586.808	15130.2	5172.33
Q7L2K0	TEDC2_HUMAN	Tubulin epsilon and delta complex protein 2	TEDC2	8								37116.4		15424.2	13160.3	424.734	9824.34		2554.97	142.837		2363.98	113.695	906.275	2726.81		42304.5	10574.2	254.061	9641.8			50255.9	19736.8			13189.3			20944.9					9906.29
Q9NVG8	TBC13_HUMAN	TBC1 domain family member 13	TBC1D13	22	1541.16	889.04	5125.89	14200.1	3555.57	1175.55	36766.5	2518.9	43410.9	12675.7		9559.43	1975.97	1894.57	1035.79	30250.1		277.933	1247.88	6928.13	2482.41	3011.95	1291.62	9849.39	11164.3	8049.82	4877.65	5325.79	7830.57	2483.75	2476.25	23088.8	849.847	12209.6	35276.4	7366.65	3954	9968.45	23610.3	4701.34	3409.03	3083.37	10240	3147.96	11033.2
Q969S8	HDA10_HUMAN	Polyamine deacetylase HDAC10	HDAC10	13	2128.2								22226.9	192.734		18168						11424.2	560.009	325.898	4339.16	318.785	324.136	686.916	619.078	3795.48	892.532	854.257					1684.32	1467.2	127.451		365.247				82.7689		914.928	7305.92	337.274
Q96CN7	ISOC1_HUMAN	Isochorismatase domain-containing protein 1	ISOC1	19	530.125	3588.87	1098.4			4175.69	7298	3686.56	5167.98	5424.56	5195.17	6456.31	6637.04	11408.9	6403.32	7533.24	3514.91	5072.25	1189.26	359.13	8425.81	230048	4955.44	9365.4	4361.38	4277.5	10163.7	13160.7	5043.81	4314.38	10893.6	3095.5	1004.16	4154.58	4618.3	6454.83	5711.58	3818.1	19328	31161.2	23339.9	4717.05	4487.67	2526.86	3901.8
P16989	YBOX3_HUMAN	Y-box-binding protein 3	YBX3	31	12908.7	18292.4	18420.3	9853.61	10436.3	11922.1	121064	75317.4	81903.7	66579	53724.3	62771.1	80798.2	83874.1	53940.6	59897.8	78740.4	85120.9	114492	82128.1	90400.2	47336.9	80779.4	101584	96696.7	109236	82376.3	75752.7	87767.3	53185.4	131764	108238	49184.8	145365	134817	54839	83845.8	75197.2	220926	73292.2	58920	61289.2	97996.5	98588.7	65663.9
O43924	PDE6D_HUMAN	Retinal rod rhodopsin-sensitive cGMP 3,5-cyclic phosphodiesterase subunit delta	PDE6D	4	1897.83	470.225	330.803		49709.7		971.954	634.621	374.937	260.525		545.457	554.133	498.632	519.773	281.779	451.471	752.744	90.5675	3177.31	1642.28		552.674	2613.67	1258.1	1433.48	429.159	646.449	747.645		346.369	180.047		214.41	708.197	13427.1		208.676
Q14108	SCRB2_HUMAN	Lysosome membrane protein 2	SCARB2	15	33161.6	32672.9	30590.8	53124.9	53532.6	62562.2	6292.49	22046	6768.52	4849.81	19537.1	29311	4864.89	4711.45	4723.03	4440.41	4931.49	4153.25	5486.6	7518.86	5682.63	6729.41	9327.98	6596.52	11749.5	9770.36	13729.5	14520.2	13901.1	13236.9	14269.8	13566.7	4119.59	13971.5	14728.9	16446.5	17272.8	18382.3	21386.3	18524.1	66886.5	17168.7	15103.6	17131.1	10728.6
Q70EL4	UBP43_HUMAN	Ubiquitin carboxyl-terminal hydrolase 43	USP43	17	4022.24	5405.65	8811.66	211.987	1070.04	1646.67		5390.27	1996.47	2339.48	16949.2	3492.1	3993.76	3825.77	4599.29	2516.77	2126.58	5967.43	2948.02	5370.99	7830.4	12463.2	5909.37	976.119	3368.36	9938.96	1109.65	135.021	1199.01		641.487		17641	32445.4		456.541	2016.77		336.077	5152.86	5231.54	13247.3	3472.67	3446.57	7857.99
P09327	VILI_HUMAN	Villin-1	VIL1	36	92907.5	80590	85686.8	54659.2	74177.2	76878.3	1363.99	20280	9404.35	18680.5	31676.6	278.624	2211.13	18038.5	19665.8	16969.1	2881.2	10830.1	355.29	7494.19	28778.8	30641.1	24770.9	15888.4	15279.8	27000.7	52896.6	1659.97	26242.3	548.741	8358.38		63397.9	1213.35	15012	7973.34	3404.33	4349.62	8345.29	4587.53	7862.37	8870.15	55984.2	5785.94	9350.84
Q03164	KMT2A_HUMAN	Histone-lysine N-methyltransferase 2A	KMT2A	77	77120.8	20184.1	34726.1	18929.8	69032.4	80064.3	16904.4	13225.3	8767.42	6709.07	16343.7	9672.55	8123.27	30198.4	6707.36	30382.5	21204.3	16104.6	31262.1	20120.5	80130	21443	15427.9	24351.9	23394.1	31530.5	10168.4	64531.6	6936.61	1868.88	6845.02	14587.1	9726.33	4925.06	10056.3	9016.48	12078.1	8873.8	12281.2	30026.9	26290.1	32323	2911.52	40140.9	9115.29
Q6NXE6	ARMC6_HUMAN	Armadillo repeat-containing protein 6	ARMC6	24	19706.8	16186.2	18477.5	9724.61	6912.42	47755.6	9958.1	22723.9	3780.23	4951.22	2184.42	37387.2	3855.16	14303.9	2900.84	3430.18	5342.22	6433.43	7125.64	6074.49	5847.33	5331.24	3788.43	8563.11	1603.68	7499.7	9463.16	5056.56	10266.9	31222.8	8281.67	6755.63	4381.16	35130.2	10214.4	9907.33	17803.7	16907.2	14392.4	14323	62548.5	26102.7	10037.6	14196	14325.3
O00151	PDLI1_HUMAN	PDZ and LIM domain protein 1	PDLIM1	44	123615	112842	184806	56601.3	61439.8	69183.7	49034.8	51566	47398.9	38848.4	63346.9	32182.8	37874	26619.6	26503.8	49043.1	56150.5	36187.8	32098.7	30772.8	45406.2	55688.9	29515.9	53284.3	51218.4	53014.5	48757	54088.7	41568.6	31902.5	39390.9	32087.4	43961.8	42949.4	92627.9	47800	24601.4	27169.9	32425	33825.5	36539.5	22314.8	30321	31546.3	28586
Q8N5C7	DTWD1_HUMAN	tRNA-uridine aminocarboxypropyltransferase 1	DTWD1	9			615.589				4538.01	2059.18	1861.04			52045.3				307.876	14648	846.436		44829.1	1723.19			2279.95		491.869	229.345	50162	171.273		213.976	174.843		183.791	47305.6	836.022				3677.34
Q6KC79	NIPBL_HUMAN	Nipped-B-like protein	NIPBL	82	56277.7	18687.7	21895.2	28752.9	27350.3	26072.2	31782.5	37374.5	28753.2	26055.7	2306.04	28414.6	46742.1	24260.6	65141.6	14906.9	19030.6	52869.3	17302.7	32236.6	26508.6		43477	33940.3	27096.6	29337.1	168392	112971	33871.1	16843.6	13228.7	13164	22833.8	12324.1	93825.1	12820	52028.6	41853.7	52764.3	35753.1	31088.6	38590.4	35223.3	18247.5	38935.1
Q96L50	LLR1_HUMAN	Leucine-rich repeat protein 1	LRR1	11			102.086		142.332	281.949		823.673	184.738				205.271		575.157	614.898	3148.75		229.426	176.559	2253.27					184.85	226.555	13496.9			4221.28					8826.94	66471.6		572.129	30080.8	321.85				24246
P53804	TTC3_HUMAN	E3 ubiquitin-protein ligase TTC3	TTC3	19	3167.27	20434	4287.13	1703.2	2138.79	2326.42	1947.78	36505.1	28740.9	1239.36	1450.66	16748.9	142997	205705	196391	209702	14820.5	1615.68	13909.1	9668.58	15509.6	1514.07	15291.6	22145.1	51196.4	1653.67	186761	103766	54966	18236.9	18683.4	51186.2	207146	7185.3	11500.9	11310.5	22248.9	52392.9	23780.4	2947.45	19799.8	1002.14	13421	24948.2	15334.1
Q5TC82	RC3H1_HUMAN	Roquin-1	RC3H1	24	227.592	183.44		417.131	328.12		12054.5	485.692	4719.48	4746.48	14187.7	481.775	5103.79	2295.3	4543.62	5485.38	1254.33	781.473	3610.32	851.285	969.129		862.862	1581.36	1182.02	647.862	5719.64	719.989	745.259	512.371	700.11	417.023	602.135	1878.49	627.768	644.471	391.539	838.914	1033.5	894.788	1306.27	4937.45	669.629		367.511
Q14186	TFDP1_HUMAN	Transcription factor Dp-1	TFDP1	6			1213.94	707.138			344.57	1018.11	585.151	1007.36		376.507	7359.86				1610.39	111.646	120.688	686.502	2567.16		1636.38	170.003	698.584	873.53		69.8484		83.6509				185.504	2636.85		2467.28	8288.51	2710.54			292.867			247.213
Q8WWF6	DNJB3_HUMAN	DnaJ homolog subfamily B member 3	DNAJB3	3								2782.3			750.455			2109.97						1340.47																								11886.5
P38435	VKGC_HUMAN	Vitamin K-dependent gamma-carboxylase	GGCX	24	11632.8	11210.6	7849.74	42068.9	823.899	750.079	1651.99	2545.64	252622	243043	5994.03	720.676	1436.79	247061	3813.18	859.57	784.204	15482.7	366.903	1549.71	244938		2661.63	2130.7	1522.14	3084.62	7576.06	2027.01	49225.8		34015.9	1608.39		537.654			8381.03	3058.9	203749	21099.5	104057	111911	90291	99757.8	149996
P01106	MYC_HUMAN	Myc proto-oncogene protein	MYC	9	988.697	3189.52				256143				354.195	3442.9	1781.56		427.068	10118.8	1002.75	739.091		748.281	731.78	1692.94	1590.09	1954.42	1330.72	742.357	889.446	1268.11	7174.29	346.065		14035		1321.79				426.797	757.698	654.474	1341.76	811.344	249.927	379.825	2117.16	687.829
Q96AX1	VP33A_HUMAN	Vacuolar protein sorting-associated protein 33A	VPS33A	35	17876.3	17673.7	16188.8	17965.1	11759.6	11957.2	45617.7	310542	7130.6	4811.84	9435.79	4269.45	7301.16	4631.75	248887	3302.89	3972.84	6089.16	12755.9	7990.08	5727.09	6646.39	254439	15588.8	13792.5	17924.5	49693	4301.72	3624.22	51046	8242.01	5370.74	8580.92	46882.2	14382.8	97001.3	52061.9	2891.49	7137.96	6805.16	8306.09	7122.43	7532.98	8570.69	5393.59
O95757	HS74L_HUMAN	Heat shock 70 kDa protein 4L	HSPA4L	85	71302.9	69544.4	70598	75599.1	41416.2	48367.6	235290	102587	106074	89838.8	15857.9	91127.2	151263	262019	81131.9	96791.5	100379	98229.2	202209	113618	130641	15138.2	127619	140892	122089	152916	74393.7	50560.6	150673	12745.3	27948.1	31729.3	46917	42559.6	38237.2	59017.9	46256.9	99764.8	54089.4	29962.7	71151.1	50703.1	42530.8	37024.8	37383
Q7Z333	SETX_HUMAN	Probable helicase senataxin	SETX	65	45119.8	3585.15	8221.41	1906.54	11708.1	1925.06	2134.88	12682	2405.66	2485.27	3719.79	1382.12	8754.72	2485.18	3843.74	23051.5	7481.33	4287.26	3611.69	1759.47	8882.64	3172.6	12470.9	12346.5	48563.9	4768.71	7037.77	1186.03	9418.63	6823.5	307.918	170.306	36076.1	3377.9	3128.18	3673.52	865.504	1190.13	16216.5	1331.84	2135.4	13627.9	5296.31	57272.8	28251
O00116	ADAS_HUMAN	Alkyldihydroxyacetonephosphate synthase, peroxisomal	AGPS	50	116244	112575	106191	89202.4	57099.5	69596.5	46550.1	58866.3	41524.1	32983.7	21908.7	41411.1	40638.9	31565.8	46653	42525	50157.9	59117.6	72608.1	59866.2	70148.7	20135.4	58608.4	68273.8	69052.6	74036.5	22514.1	25839.7	27737.3	17888.1	20289.5	19896.2	21847.9	18943.3	24266.9	22073	74853.4	54325.1	59700.2	70470	70623.5	70405.6	48539.2	47366.7	46716.3
P33992	MCM5_HUMAN	DNA replication licensing factor MCM5	MCM5	93	28513.9	18213.6	11931.7	18971.3	24532	82565.3	111828	134025	104837	114823	12056.8	104223	118505	111343	89106.5	96823.1	111263	82965.9	89968.4	136131	95047.8	21889.9	114042	97339.7	105049	88868.5	85460.2	104161	45545.5	27319.3	52703	52697.3	3550.15	66046.5	120079	70486.2	32566.7	33994.2	48540.4	37109.7	50764.3	72886.3	33352.8	37854.7	32715.4
P62854	RS26_HUMAN	40S ribosomal protein S26	RPS26	16	6543.96	2983.82	2195.94		2045.48	2865.79	8532.56	19860.7	17583.2	13871.9	884.374	15190.6	11974.2	14882.1	22392.3	15827	16763.1	15943.7	13308	21504	12746.2	1522.74	18026	9603.27	5887.65	11870.5	13119.3	23097.9	15198.9	7961.35	12584.8	9227.47	4561.69	11192.8	9943.2	12876.3	23215.4	23111.3	28729.7	13321.2	52768.7	4900.04	9835.52	9275.75	8604.98
Q7Z6J9	SEN54_HUMAN	tRNA-splicing endonuclease subunit Sen54	TSEN54	19	8214	2514.47	3271.21	240.025	1010.56	853.368	2513.55	2538.73	1302.17	1059.39	306.658	2308.44	1523.15	788.634	26385.5	1715.34	477.531	874.843		1420.05	832.85		1449.29	1816.11	2305.94	2460.65	1797.68	1841.93	2582.18	311.231	646.872	13048.8		860.85	1335.57	1757.61	3306.7	2816.88	25122.2	364.116	509.758	1476.5	548.072	350.279
Q96PE3	INP4A_HUMAN	Inositol polyphosphate-4-phosphatase type I A	INPP4A	29	2609.45	8983.23	2413.35		13996.1	1562.35	3194.73	437.627	793.898	14103.3		487.556	10463.2	177.833	1721.19	547.456	850.9	630.854	1029.75	4962.66	3571.4		3116.82	5482.62		3306.03	2822.55	1338.48	9977.86	137.234	2520.75			11023.7	6759.35	24420.1	5037.28	2785.7	7116.48	1273.17	6863.89	1401.28	5399.59	2621.57
Q02952	AKA12_HUMAN	A-kinase anchor protein 12	AKAP12	24			604.102	1713.77	2249.59		5031.73	4796.11	12258.3	17868.2	1265.63	2641.65	8140.52	2678.4	2859.37	8794.36	3259.91	3538.88	3841.15	7027.92	6630.14		4572.19	4329.99	5176.28	4875.32	2343.19	1652.6	2244.92	1022.9	3728.99	1748.92	15681.3	1797.71	1196.52	6775.34	291.867	243.855	26693.6	498.52	305.829	3040.2	215.179		1368.87
Q9UKK3	PARP4_HUMAN	Protein mono-ADP-ribosyltransferase PARP4	PARP4	58	31299.3	34342.2	116056	36912.8	90314.9	42159.6	17577.1	6529.6	3851.65	7752.23	80168.9	15147.5	628.747	20256.1	882.042	54003.7	18438.4	3046.86	5810.95	61745.1	23323.5	7331.02	23829.6	11253.4	1608.46	26297.1	15872.2	18957.4	20719.4	31591.8	18296.5	1965.99	5173.22	5577.16	16316.8	26901.3	23752.1	12629.5	45760.2	34759.1	3415.17	23597.4	4604.72	13077.7	27440.9
A0AVI2	FR1L5_HUMAN	Fer-1-like protein 5	FER1L5	4	5502.9	1965.38	5513.3	205.803				3342.6	4049.84	2237.69	4894.38	2220.42	3242.89	1384.7	1632.67	1701.46	2370.87	3670.08	2516.53	3872.55	6854.81		6353.41	3716.67	6357.77	4989.69	2074.7	2310.2	2488.41	282.108	248.224	353.57		670.718	525.404	719.376	5864.34	6060.85	8105.99	2148.99	2175.55	2621.06	4372.76	4618.56	9024.75
Q14432	PDE3A_HUMAN	cGMP-inhibited 3,5-cyclic phosphodiesterase A	PDE3A	25	867.472			727.701		4137.24	21004.5	27492.6	22587.5	23606		24807.5	24198.7	17807.7	21037.9	23267.8	18243.6	15889.4	16924.9	15958	31750	1186.48	18826.2	21233.4	23816.4	23595.1	13749.4	14701.6	15826.5	44810.1	6855.35	6544.81		11648.1	10796.2	10950.4	15353.5	15381.4	17444.7	11840.9	12246.3	11193.1	10195.2	9166.26	10423.8
Q9Y6X9	MORC2_HUMAN	ATPase MORC2	MORC2	27	6476.67	6696.16	8148.07	2404.16	6714.07	5448.11	3689.62	32056.3	64140.6	2407.81		6931.86	2946.47	1449.43	3420.22	1872.47	3272.77	915.426	62010.6	3060.33	21035.8	925.862	46763.5	3872.85	14986.2	68026.4	7247.15	12499.2	552.941	18690.1	18151.4	270.915				3085.47	13157.7	11587.3	102369	3733.03	2595.97	3217.37	18052.6	35508.5	186.572
Q70CQ2	UBP34_HUMAN	Ubiquitin carboxyl-terminal hydrolase 34	USP34	89	69180.8	4336.94	2207.78	13077.7	8232.26	23918.2	8820.01	22305.5	10540	15468.9	2837.59	4532.16	4183.81	2659.94	8880.69	7662.42	23942.6	14226.2	1748.5	7504.37	11863.9	7355.76	5032.89	22854	11089.1	8462.48	39689.9	15715.7	15798.5	7125.03	4915.73	23393.3	1604.06	6306.59	8019.9	4341.66	10056.3	7424.61	13917.4	16143	10452.4	2556.6	2943.96	9932.37	11786
Q9BUH6	PAXX_HUMAN	Protein PAXX	PAXX	13	11523.1	10309.5	8108.81	3782.24	4928.18	4335.67	8612.42	10466.6	9572.72	10843.6	4552.06	7704.6	7450.96	2736.82	4857.73	6435.28	4525.26	4564.23	6981.59	5837.1	24612	3204.6	4973.46	5256.23	4568.82	5988.7	17628.2	21009.1	20582.1	17713.7	14765	14532.7	2939.98	15121.9	16892.1	12617.7	10845.1	9635.57	10179.2	7747.69	6772.42	8265.95	7275.25	13122.4	7626.53
Q9BWT6	MND1_HUMAN	Meiotic nuclear division protein 1 homolog	MND1	9		1084.35	4901	3009.08					1058.64	1494.94		938.143	272.523	1679.97		290.793			649.286		7709.73	267.769	3855.31		1817.81			3432.28	1731.78	10027.2	3399.32	211.678	403.203		913.009	585.494	3904.25	4762.28	4795.18		1265.05	873.225	2475.05	2352.35	2494.92
Q70J99	UN13D_HUMAN	Protein unc-13 homolog D	UNC13D	39	17395.2	16531.4	27722.7	10399.7	9238.07	7468.13	9277.78	6656.82	6514.43	1926.06	4407.22		6218.17	1033.02		886.189	7324.3	253.914	1544.85	803.827	2360.36	937.571	3522.08	4470.27	9142.42	995.327	1924.32	785.509	7097.19	3973.27	2899.86	1104.54	2001.52	3119.45	7246.68	1788.96	5021.84	28171.9	11795.3	3488.89	4699.83	11677.9	6026.48	2339.72	6955.08
O75911	DHRS3_HUMAN	Short-chain dehydrogenase/reductase 3	DHRS3	9		1255.53					1354.54	3314.53	1353.83	1382.71	474.482	2218.16	1954.67			229.726	948.51	1017.04	1229.39	1428.32	2812.62		3634.15	4013.89	4234.55	4866.52	1001.67					1823.34	372.836				508.285	982.768	751.869		673.283	556.826	682.331	1205.27
Q9UBF2	COPG2_HUMAN	Coatomer subunit gamma-2	COPG2	37	5925.53	14244.7	16425.7	55481.8	10343	23221	10142.1	12029.4	10303.2	16215.3	12156.8	19516.1	12797.7	15130	17497.8	14917.6	14749.9	175852	14868.3	17729.7	51704.1	4243.69	20259.3	9768.06	7609.96	7693.15	14103.5	13028.9	38375.7	8065.88	14314.3	8892.91	2878.45	11634.6	20893	12629.1	16549.3	14016.2	15447.5	11277.9	6600.01	5940.18	8654.15	32705.8	10233.8
P40763	STAT3_HUMAN	Signal transducer and activator of transcription 3	STAT3	65	55957	65317	56247.3	20930	18155.6	42291.2	34296.5	49237.3	59227.6	38648.9	17567.3	29455	30964.7	38369.1	29607.4	27898.4	59051.7	60496.7	35856.7	33659.2	54128.3	8706.48	39195.2	69786.6	58565.1	48945.4	15752.3	30639.7	33629.5	24818.9	25037.1	16852.4	6573.66	15906.9	28710.4	116624	41273.2	50161.4	52446.3	50413.9	60958	59996.5	53475.9	45595.5	35900.6
Q5JTJ3	COA6_HUMAN	Cytochrome c oxidase assembly factor 6 homolog	COA6	8	1300.08	8238.16	1218.05	1072.24	1074.9	2519.64	18025.1	34964.2	9444.66	8423.61		9930.77	11844.2	2606.72	4440.49	6628.8	4838.67	15291.4	4517.07	15089.2	6845.13	2917.12	7473.88	5845.05	5786.26	6073.75	19930.6	21925.7	22915.4	2252.15	3093.33	2226.31	1605.09	14031.3	15720.2	36404.3	9588.01	8604.02	10446.5	6250.54	6816.93	6383.11	5125.33	5309.37	4508.04
Q9UQ13	SHOC2_HUMAN	Leucine-rich repeat protein SHOC-2	SHOC2	15	14558.1	4293.06	12086.1	3833.97	671.817	5203.33		2451.22		1476.97	1299.39			3905.64		526.647	3152.52	3104.48	4426.21	10377.4	1164.01		808.685	1115.97	791.099	1196.65	12676.9	1125.83	1174.57	1152.28				229.69	33383.7		275.772	439.242	800.731	1311.58	388.482	2723.57	3107.41	113.402	401.055
Q9Y6A5	TACC3_HUMAN	Transforming acidic coiled-coil-containing protein 3	TACC3	27	31965.7	22751.3	3186.55		504.86		6345.46	2163.8	3053.72	3144.88	6088.93	3195.42	6772.49	3207.15	1849.63	16793.7	5693.13	1403.77	4873.12	5905.12	4331.17	131049	4408.86	5394.28	4940.94	5615.55	9308	10591.4	14338.9	13168	917.985	796.348	155555	1165.24	11062.5	25361.3	29547.6	27963.8	3542.4	38930	4456.16	2181.1	22712	25057.5	1931.01
Q96T58	MINT_HUMAN	Msx2-interacting protein	SPEN	93	18232.7	63946.2	79703.9	10249	4334.66	6104.8	61868.2	59318.5	8207.03	6350.24	7149.72	69379.9	46657	62478.1	46245.7	4602.44	50516.2	53946.4	65976.2	56743.8	57120.5	316.716	65597	57444.8	6854	17810.8	57511.3	33430	42016.8	626.189	60240.8	35148	25595.5	26785.9	38096	15003.9	70817.1	83396	87157	40124.9	4328.1	35883.8	64662.6	10130.2	68788.7
O43681	GET3_HUMAN	ATPase GET3	GET3	26	14376.4	13588.5	13006.7	2698.36	8528.85	8412.47	14008.9	9848.27	9474.14	8952.77	14813.8	15701.3	13689	16076	12019.1	11752.9	15379.4	12654.6	15371.1	6156.53	15083.8	587.029	16010.3	8905.3	11651	9368.66	29123.6	25581.8	35743.6	17801.5	12439	13360	1919.33	33923.4	22810.7	46406.6	11787.2	13494.7	35160.9	7885.83	8748.62	7979.42	7030.5	6500.74	2047.39
Q9BRT6	LLPH_HUMAN	Protein LLP homolog	LLPH	8	3039.32	2221.43	1187.97	586.863	429.216	918.805	4417.26	3813.51	4583.15	4753.98	322.35	3469.17	6531.85	4273.19	4236.46	5236.84	2494.14	4329.32	2741.49	3640.56	4298.1		5454.84	4337.92	3545.93	3940.59	4516.54	1692.23	2844.16	2853.37	2899.66	3067.3	1275.15	3143.57	6707.34	3036.35	4303.04	5315.04	4859.36	3779.5	3027.32	3374.16	1285.91	1065.66	1296.35
Q86TU7	SETD3_HUMAN	Actin-histidine N-methyltransferase	SETD3	36	6701.71	9059.56	107274	19154.1	1565.48	620.748	7863.24	13361.8	11217.2	15340.2	6786.18	7653.35	9848.37	15887.6	8089.7	10930.8	24669.4	19039	7752.1	19255.8	10044.9	7858.5	20113.4	12216.4	22151.8	13278.4	9346.96	13455.8	15201.1	14770.7	8014.26	10367.4	6883.5	10124.4	9915.19	28454.5	7080.53	8825.14	11025.3	3009.2	11840.7	5136.77	4296.44	48745.5	3958.53
Q2QGD7	ZXDC_HUMAN	Zinc finger protein ZXDC	ZXDC	11	3599.49				77.638			593.492			6901.57	506.991	1781.96	135.394	344.367									2793.82		1833.35		1588.63	3695.56		20201.4			1743.36			533.904	2107.16		199.284	269.454	99.5465		512.292
O75764	TCEA3_HUMAN	Transcription elongation factor A protein 3	TCEA3	13	809.912	292.729	10775.5				809.161			3620.07	4048.44						295.143		1675.65	2158.61		44456.1			1260.06	960.585	30139.6	284.503		29263.1	34018.7	35801.8	44485	30004.6	38578	30883	55078.5	122.167		1759.47	57354.3	60796.7	12162	63030
Q9UKX7	NUP50_HUMAN	Nuclear pore complex protein Nup50	NUP50	43	67498.7	73861.9	40741.2	28079.3	25409.4	34822.1	83875.4	44934.2	24841.4	38882.9	21087.4	72254.6	126049	15033.8	11312.7	19814.2	16493.9	50665.4	11390.3	61553.5	62359.5	20960.1	13059.8	17180.7	26031.4	19035.9	12075.2	68522.6	63190.3	7723.31	15924.6	11520.9	16164.3	51764.3	25496.6	43696.1	17555.3	23932.2	21798.3	22403.3	26373.7	22882.3	26747.9	22403.6	19728.1
Q9BUB5	MKNK1_HUMAN	MAP kinase-interacting serine/threonine-protein kinase 1	MKNK1	15		10378.3	18995.3		1580.07	4857.87	3158.53	615.784		1127.64	953.517		113.824	1239.95	598.652	2307.57		1029.57	1448.9	2427.19	1141.06	684.988	993.431	1768.78	2951.07	1376.65	244.688	2405.96	910.295	327.169	265.83	1160.3	802.739	11799.7	10187.6	1040.01	603.972	394.681	6751.75	762.657	2160.97		1721.39	2365.21	2160.53
Q8WZ73	RFFL_HUMAN	E3 ubiquitin-protein ligase rififylin	RFFL	7					19752.1		8228.9			234.831		490.597				337.754				178.166		345.151	5538.56	4335.69			5779.47	13646.5		7647.98		6396.5	216.312	200.91	206.734	3275.94		21977.9
Q9H568	ACTL8_HUMAN	Actin-like protein 8	ACTL8	13	1345.64	331.716					9183.1	11528.2	7253.26	7642.53		8667.61	8683.19	7721.36	8635.59	7818.2	10137.1	12073.6	6970.29	6817.99	7982.31		11986.7	12587.8	9957.09	10567.4	145.184	887.598	1303.13			326.022		45207.9			946.828		18835					108.564	209.574
Q8NC26	ZN114_HUMAN	Zinc finger protein 114	ZNF114	6	202.595								1827.5	319.692	159.156			714.952	300.592	6996.7		396.696	843.567					9182.19			5036.54	315.827	5633								2684.65	4760.08		1925.91				245.208
Q8N960	CE120_HUMAN	Centrosomal protein of 120 kDa	CEP120	9					4656.99		2313.08	235.547								4587.09					107524		5695.7	843.066	5044.33	4800.79		374.171							701.83	6211.71					295.228
Q96NH3	BROMI_HUMAN	Protein broad-minded	TBC1D32	5		1341.03	1301.62									3460.44		387.123	20531.7		6013.21	542.439	140.44		1554.91											1717.31			1211.34					625.233
P36508	ZNF76_HUMAN	Zinc finger protein 76	ZNF76	7			2137.7					16160.9	13726.8	2993.62		18328.1			1579	16501.9	130.239	12708.6				2395.5							155.377				1823.19	11340.3	1104.32			1107.75	676.035
P30838	AL3A1_HUMAN	Aldehyde dehydrogenase, dimeric NADP-preferring	ALDH3A1	5	1517.62	1426.88	896.772	184.829						2610.93	479.181		1673.84	2203.39	340.375						162.465						4761.38		1803.64	2218.54	1587	2086.11		1931.95	257.476	1633.58	463.166	308.829	231.621	1712.48	85.157	432.04	917.36	353.291	335.756
P51790	CLCN3_HUMAN	H(+)/Cl(-) exchange transporter 3	CLCN3	14	9149.34	8135.96	4684.2	1374.87	212.287	530.804	8468.72	422.882	132.741	291.961	369.84		181.599		801.857	581.753	985.338	452.833			4347.66	4809.24		488.093		1771.68		167.225	2386.65	539.306				18805.5		934.334	1632.38	731.326		450.273	130.808	922.187		6527.16
Q05D32	CTSL2_HUMAN	CTD small phosphatase-like protein 2	CTDSPL2	15		2166.01			596.239		3664.37	1915.87	605.106	1441.93		1689.55	695.573	6689.13	1108.05	722.721	11941.7	646.419	6157.99	5116.51	5112.27	189.037	3022.82	2807.02	2878.99	2636.2	1089.86	846.569	1272.14	922.654	1714.74	6278.19	1896.82	4352	3466.68	2326.02	1536.2	1538.72	2952.41	5676.63	6245.8	5801.54	4497.94	4292.2	5224.64
Q16270	IBP7_HUMAN	Insulin-like growth factor-binding protein 7	IGFBP7	5							15327.1	2778.64	2358.8	2055.59		1790.23	2301.89	1894.53	2623.49	2209.34	1828.65	2530.5	3083.36	3411.47	7873.62		6345.79	4520.54	3717.41	3411.46	2770.42	2382.36	2127.37	2871.37	1705	1274.12		2509.31	2526.16	2359.83	2588.21	1842.82	3036.61	2272.92	2847.42	2420.38	1513.66	2056.67	1851.82
O15226	NKRF_HUMAN	NF-kappa-B-repressing factor	NKRF	39	16617.8	21315.1	20936	17010.3	15582.5	235215	39950.3	44479.8	99386.1	104255	20446.7	28426	50120	26079.3	30579.5	22906.6	50483.3	73001	16586.3	170351	33500.5	8669.27	103032	51309.3	100842	104731	35281	40429.9	35028.5	31799.7	10771.3	13111.7	9705.9	13696.4	14841.4	38196.7	24472.2	33232.9	58856.2	21375.1	33306	42432.6	20005	21997.8	29803
Q5QJ74	TBCEL_HUMAN	Tubulin-specific chaperone cofactor E-like protein	TBCEL	9	6648.03	7153.06	8049.82			316.586	354.233	260.43	776.106	342.864		458.378			357.334	242.231				9820.54		853.809			198.119			2783.54	173.752			832.404	1040.86	4300.46		1835.28
Q9HCN8	SDF2L_HUMAN	Stromal cell-derived factor 2-like protein 1	SDF2L1	9	11456.7	12678	12512.1	19442.5	18197.4	17788.9	2496.44	7205.97	4743.43	5380.8	7381.04	3048.07	3185.27	3336.75	3370.7	2184.7	4727.18	5873.15	6125.86	6796.46	8317.34	3661.74	6187.97	10357.4	8994.86	9056.6	4606.36	6348.78	5481.52	571.4				3657.37	4064.46	2480.32	6883.14	5678.21	5420.11	4718.49	7532.02	6751.48	3247.12	3454.32	3933.74
O15265	ATX7_HUMAN	Ataxin-7	ATXN7	10		135.521					92.598	163.163		134.323	89.2545					656.947	689.714							4468.51			222.856	5770.36	707.319			395.08		146.648			3533.49						530.838
Q14684	RRP1B_HUMAN	Ribosomal RNA processing protein 1 homolog B	RRP1B	47	33045.7	32705.8	36035.3	31994.2	15843.4	17614.4	38043.1	34317.5	232477	29982.5	9938.83	33024.1	26412.4	166675	42074.4	14676.5	35311.1	28095.9	42445.3	40265.6	37742.3	8800.66	46761.9	41998.7	43247.6	43157.3	12736	30302.7	16537.3	5164.49	17533.7	23204.5	8768.23	9644.48	12698.7	9231.01	34901	17253.5	29187.1	20615.6	150227	154300	22807.3	112460	18566.3
Q9NZM3	ITSN2_HUMAN	Intersectin-2	ITSN2	59	2627.55	15277.4	24187.7	4801.4	4960.26	65814.2	349020	22292.9	257118	18808.2	438867	238271	18411.6	12115.1	11900.5	524068	5191.85	377395	14959.5	13352	7159.86	347963	293864	25073.9	6039.49	22101.4	5643.1	9652.29	401785	264.731	5508.58	440.126	13034.7	3404.78	471597	13615.6	1793.82	3178.41	3061.33	358862	49741.1	58525.5	41547.8	63484.2	46183.9
P46782	RS5_HUMAN	40S ribosomal protein S5	RPS5	41	36564.3	54924.1	31017.1	25563.9	57908.3	23335.9	134336	113046	119553	187749	88941.4	154690	125584	161222	175385	126263	128055	130978	144978	127036	138710	51188.6	147797	130445	164794	132627	157008	151913	119062	127773	123849	143785	67549.4	132552	134884	149929	224974	93674.2	94250.8	82462.7	101797	103751	111879	99240.8	100580
Q12893	TM115_HUMAN	Transmembrane protein 115	TMEM115	6	2273.56	2562.61	1592.87		1272.88														64.2421								432.313	338.44	197.588					212.508	1371.5	1700.41	1734.07	1822.46	2226.47	581.671	574.957	984.673	1701.04	1770.02	643.859
Q05932	FOLC_HUMAN	Folylpolyglutamate synthase, mitochondrial	FPGS	22	36230.4	269.962	832.36				6631.44	7884.96	1789.41	8122.42	161.216	12540.3	17426.3	248.206	996.262	1452.83	792.201	4115.14	8499.82	4718.32	3401.36	298.259	6523.87	305.065	10116	9306.62	4271.32	3478.14	4441.38	5183.61	2302.78	5033.13	11353.1	126.779	5081.43	2081.74	6835.57	12059.2	9397.28	5687.96	7805.55	3654.57	5002.97	4396.21	5057.98
Q9P278	FNIP2_HUMAN	Folliculin-interacting protein 2	FNIP2	8		2955.79	4627.11										42514.1	42988.3	38503.9	41464.5	2998.18	203.258							147.502		266.836	797.802								496.786				773.973			166.653		1346.02
P42356	PI4KA_HUMAN	Phosphatidylinositol 4-kinase alpha	PI4KA	72	31462.8	25790.1	56661.5	32844.8	106121	6284.86	72148.6	55211.7	50364.2	53811.9	67952.8	42754.9	45472.9	39779.1	50702	48851.9	40172.7	42857.2	27753.1	29449.7	4898.83	88089.9	47391.6	50100.4	30745.5	44443.6	41310	42040.9	44761.5	47189.5	42571	40067.3	78301.6	65168.7	72670.3	41250.9	17005.2	1238.89	21375.5	8051.39	11084.5	15361.6	20511.3	8998.98	26748.4
Q9Y2I7	FYV1_HUMAN	1-phosphatidylinositol 3-phosphate 5-kinase	PIKFYVE	53	5595.33	4099.88	5229.14	29156.6	4445.8	1487.67	14201.2	3875.75	35342.6	4784.71	5850.45	2385.49	452.908	6787.72	793.151	6145.37	6677.82	426.332	8514.49	13440.8	2483.78	6018.3	765.349	3566.41	21638.4	24609.6	22155.1	8724.91	9871.1	9860.51	1149.67	26821	6442.99	3350.67	4777.45	14112.5	720.24	15269.1	4271.26	2632.21	3676.88	8274.69	10155.8	7817.96	9811.68
O60869	EDF1_HUMAN	Endothelial differentiation-related factor 1	EDF1	13	2816.29	7065.01	7247.02	1414.91			31400	33654.8	36653.2	32324.4	9844.57	37503	20662.5	31796.8	32380.2	33209.4	40205.8	26524.9	26808.2	28479.3	32223.3	2178.41	16672.5	29170.5	26621.6	27509.6	37415.7	38898.2	35698.2	38084.6	36963.5	40205.5	9038.94	43859.4	40027.8	32011.3	35267.4	33001.2	28585.8	16515.2	21020.8	20513.5	22816.6	26425.8	15825.6
Q8TEK3	DOT1L_HUMAN	Histone-lysine N-methyltransferase, H3 lysine-79 specific	DOT1L	29	29828.5	1268.83	665.651	192729	179381	26756.6		2023.4	28914.2	2586.32	2677.16			5666.83	106.944				8327.64		16079.5	1732.06		591.814	12101.2	7806.34	3470.32	4674.99	3342.16	603.961	282.23	5838.6	804.825		1102.15	9731.35	276.291	9246.65	1260.5	82336	1633.75	1843.53
Q96RK0	CIC_HUMAN	Protein capicua homolog	CIC	23		7452.52	668.353	2705.18	11570.7	7416.66	1208.9	5861.6	6156.95	26402.7		4702.04	3298.32	477.569	2611.43		499.555	468.174	6078.05		9052.02	5998.01	1166.78	1161.5	77246	8528.56	5855.47	1578.39	60627.7	15414.5	5636.24	18241.9		7189.13	1304.35	74298.3	363.166	8442.7	5253.44	4547.28	4814.97	12407.8	4228.42	3544.21	4332.83
Q96RF0	SNX18_HUMAN	Sorting nexin-18	SNX18	8	2042.27	1521.28	1837.54		933.967	509.933	307.153	308.929				763.237		1233.33			119.195	100.046	248.747	286.951	522.666	1483.3	631.383	719.399		633.635		921.741	1242.5				1653.59	303.451			2119.91		82.6414
P28799	GRN_HUMAN	Progranulin	GRN	26	93071.7	101243	89951	66738.6	71522	73403.8	13485.3	15514.1	10134.9	10947.4	34732.2	7217.08	9386.51	4446.25	5009.8	7587.19	2488.55	3399.96	6947.37	5074.34	9993.38	42004.2	17401.6	15069.2	11619.4	7551.21	21044.3	25110.5	30202.6	18708.5	17722.6	19582.5	26705.4	28947.2	28844.2	23851	21031.8	20654.4	24276.5	26461.8	20718.2	21054.7	18442.5	17029	15512.6
Q14694	UBP10_HUMAN	Ubiquitin carboxyl-terminal hydrolase 10	USP10	40	22239.2	25502.3	18200.4	4923	10314.2	6351.82	6100.76	7941.07	9045.68	6834.02	48460.3	74308.6	14876.6	5539.55	9425.84	12054	11422.4	10750.3	23569.6	9923.13	11674.2	12470.7	75800.3	11905.7	76949	64659	4810.78	44879.4	5360.11	6054.33	8077.27	7022.53	3813.7	7181.57	8627.4	5851.63	37198.5	11533.6	15901.6	11570	12628.1	11052	19182.3	15344.2	7791.44
Q71F23	CENPU_HUMAN	Centromere protein U	CENPU	10		616.495					2219.03	9519.66	6388.67	10306.3	104.995	1577.15	38398.9	2578.64	8430.32	31239.2	358.934	572.433	850.89	14530.4	20054.8					953.387			748.884	202.164	1001.55				1133.03	536.309	496.249	8349.44	1325.52			395.871		1699.7
Q9H1I8	ASCC2_HUMAN	Activating signal cointegrator 1 complex subunit 2	ASCC2	28	6383.08	4170.59	6998.11	111.568	1218.82	809.134	5380.78	4386.32	3804.63	5074.32	497.407	4231.32	5293.55	3974.36	5015.24	3586.66	6766.17	6212.19	4814.97	8115.04	6442.43	3485.39	3300.02	6633.51	7495.55	6908.88	10953.5	7999.55	7730.99			606.927	3666.58	1711.8	17343	2546.1	4399.42	7484.86	7865.66	9326.53	5244.2	2080.66	5842.32	6072.11	14046.1
Q8N4S0	CCD82_HUMAN	Coiled-coil domain-containing protein 82	CCDC82	7		9599.68	471.391	1029.81	1963.84																940.346					622.042		88.5158	161.192							221.097			2048.34
O95139	NDUB6_HUMAN	NADH dehydrogenase [ubiquinone] 1 beta subcomplex subunit 6	NDUFB6	11	38856.7	4266.78	3908.9	2548.61	75.4179	5396.34	487.249	4315.27	335.484	1623.31	2713.57	1822.36	1547.7	1060.39	1210.05	1781.31	6605.3	530.001	1480.45	368.972	462.22		381.044	1507.45	1566.84	8207.96			6737.09	771.478			669.159	1044.82	2380.27	2948.65	658.437	3125.94	1425.02	778.721	1417.92	674.273	921.744	30406.7	539.552
Q13574	DGKZ_HUMAN	Diacylglycerol kinase zeta	DGKZ	17	2431.39	1125.82	3934.37	2451.61	288.659	286.284	2892.27	1916.07	1705.26	1650.73	3331.49		3146.94	2708.97	7278.6	6832	33821.4		3800.69		1320.52	281.386	135860	3324.23		439.678	2198.63	2309.91				2218.61	9769.71	1673.02		2909.34	559.584	842.623	549.598	10579.5		7812.88	225.545	841.385	535.319
Q14254	FLOT2_HUMAN	Flotillin-2	FLOT2	37	17156	14113.8	16805	18282.4	12160.9	19104.6	13527.1	13225.6	12808.5	12263.5	5467.63	16464.4	16736.1	9472.96	10259.3	12562.8	8247.42	9311	8266.81	18060.2	15608.7	6311.06	12099.8	21830.7	8486.77	9806.6	12735.6	14210.2	27054.9	13138	12634.2	22353.4	4508.19	17639.8	13091	22724.9	18819.5	14350	24010	25563.5	29047.8	22196	25545.1	25892.6	24858.5
O95292	VAPB_HUMAN	Vesicle-associated membrane protein-associated protein B/C	VAPB	21	74020.5	57435	70463.3	9711.09	28477.4	26290.7	43751.4	41755.9	17986.4	18849.3	22096.9	13927.5	44468.8	28602.2	23341.2	11978.9	35853.6	25548.7	30876.1	32546.8	36530	4469.9	40033	59949.8	41219.7	44561.2	48761	56005.1	61840.2	24214.6	23538	22113.5	3472.69	42375.1	13331.6	54691.8	43502.3	44196.9	43569.5	53420.3	64819.3	60261	56768.6	58487.7	57638.9
P13747	HLAE_HUMAN	HLA class I histocompatibility antigen, alpha chain E	HLA-E	19	22535.2	23658.3	23716.2	13984.9	24095.7	17783.3	27495.5	12908.9	10147.5	17309.9	5417.25	9077.27	22926	9717.6	9608.57	9884.4	5507.86	9626.65	12715.6	6877.56	8129.14	4074.68	13955.5	9878.91	14660.7	9534.31	20799.9	18275.5	11488.3	3850.51	2148.02	4095.09	1918.5	11218.7	12874.1	3764.75	9840.84	8422.03	8419.33	19589.7	25666.3	27005.8	16282.9	17322	21913.2
Q9UKW4	VAV3_HUMAN	Guanine nucleotide exchange factor VAV3	VAV3	8		2103.46	5348.69			17330.9	6395.49	5973.68	5495.9	3901.31	823.733	3773.97	5189.23	4491.35	5020.58		5756.45	4268.43			222.1				1969.08		478.311						368.665				1592.71					2552.78			1018.05
O00268	TAF4_HUMAN	Transcription initiation factor TFIID subunit 4	TAF4	28	9319.88	534.468	284.405	36043.7	39072.1	226.527	1377.39	81459.1	76148.6	17487.1	211.288	2553.9	528.086	318.84	12439	1891.31	871.198	55980.2	49768.6	862.384	851.763	2417.12	1069.53	84855.6	1934.02	61937.4	150512	1932.52	5585.42	336.619	94188.6	725.22		1766.82	156896	1841.18	73711.6	1612.44	1938.13	1256.63	59993.7	59965.6	1252.69	57419.9	58728.9
Q9BT40	INP5K_HUMAN	Inositol polyphosphate 5-phosphatase K	INPP5K	12	6835.43	5401.42	5723.16	3686.86	750.842	711.88		3923.17	2937.8	303.332	1296.76		906.611	711.263	4260.96		1282.05	1147.75	170009		1884.05	2569.03		534.063	378.215				266826		148.883		1928.29	829.456	941.365	1520.11		481.971	655.93	150.23	185.002	180.886	2491.15	132.637
O60547	GMDS_HUMAN	GDP-mannose 4,6 dehydratase	GMDS	26	4603.3	4174.32	3334.89	32609.1	12824.1	13494.6	22964.7	13789.7	10207.8	11822.3	11670.9	8358.04	13025.3	12074	17967.9	17489.2	10348.6	8663.98	9965.19	5348.78	10946.5	8338.05	9108.88	9883.47	12219.3	11634.1	23259	1175.93	1199.97		1354.12	668.477	8072.8	9722.87	1117.88	5128.45	6488.52	3201.13	3205.72	3423.15	3480.36	5481.22	6379.33	6764.37	6803.71
P55769	NH2L1_HUMAN	NHP2-like protein 1	SNU13	13	91531.9	20335.3	89530.8	60663.7	3113.32	45196.2	56262.6	54943.5	39921.8	42142.3	295.364	15320.6	41794.8	28824.2	28534.4	29551.6	42806.6	42584.4	43278.6	45839.8	68664.8	817.671	70123.7	54085.8	59478.5	64413.7	53193.2	45296	49108.4	33620.8	39023.2	44207.7		35512.8	37895.5	40635	70387.2	69722.5	83019.1	64329.8	70735.8	72200.4	45727.8	68831.1	71407.6
Q15013	MD2BP_HUMAN	MAD2L1-binding protein	MAD2L1BP	6			546.113														275.407		523.094	1096.81	1401.87		630.105			612.958		298.345										435.635	627.868						454.473
Q9NZ32	ARP10_HUMAN	Actin-related protein 10	ACTR10	19	3022.98	5577.32	4901.48	2192.63		291	6409.28	9695.27	678.681	41469.8	2719.67	25371.9	14360.5	55114.8	50259.6	60316.7	2917.3	627.398	2933.71	15513.3	37205	2053.72	23916.9	1514.75	51425.3	568.653	10817.7	17542.3	2082.35	400.178	317.642		3386.04	11494.8	498.835		1329.08	1044.13	1046.27	6146.87	1329.13	1301.31	779.089	1793.74	803.893
Q5D862	FILA2_HUMAN	Filaggrin-2	FLG2	2	1174.89	1249.92	1211.55	2896.76	2558.65	2863.46					260.828										179.42		343.26	259.973	191.344	236.139				94.8711			506.137	5145.94	394.796		359.768	259.996	526.127	222.855	165.013				412.928
O00488	ZN593_HUMAN	Zinc finger protein 593	ZNF593	8	749.227		133.182				359.006	602.613	773.74	1669.06		1216.83	1204.25	1211.74	702.408	1397.87	315.032	1200.33		1045.22	1168.54		1524.7	1457.15	1208.4	2251.23	790.031	7409.96	2250.71	311.879		198.131	910.075	764.294			1816.65	448.977	690.619	1341.16	308.386	717.177	225.67	1391.59	643.903
Q9NWF9	RN216_HUMAN	E3 ubiquitin-protein ligase RNF216	RNF216	9		435.253					162.869	372.263	99.1896	113.864		179.15	164.909	8363.52		511.05		182.866	141.339	1125.29	2904.69			5264.09	361.279		213.449		4296.07		76.052					648.262	450.377	352.671	516.281	1001.29	2010.42	590.591	9636.98	489.015	10017.6
O75462	CRLF1_HUMAN	Cytokine receptor-like factor 1	CRLF1	6		2707.23			2235.02		659.108	6661.75					6374.94	5848.34			691.653							466.725							1174.34	1191.8		535.404	620.09		1197.31	340.09	758.535			866.592
Q5JPH6	SYEM_HUMAN	Probable glutamate--tRNA ligase, mitochondrial	EARS2	24	23754.2	604.401	5961.69		5954.91	12080.2	2702.07	13570.6	10514.5	4768.35		6707.72	1775.45	11191.5	26282.3	2096.32	12774.2	7544.4	1909.26	9926.81	1859.4	46.1067	27642.6	6512.04	12292.4	12909.4	3214.88	28041.2	16685.2	1514.19	1151.01	2520.39		3433.39	1408.29	7234.35	11774.6	13530.9	453.883	3401.52	3182.09	2437.68	10170.7	7910.7	2022.59
Q8N9N7	LRC57_HUMAN	Leucine-rich repeat-containing protein 57	LRRC57	11	4914	4706.28	9013.7	4272.21	5072.31	4787.49	2898.92	2113.26	822.609	2007.67	1074.12		635.698		1385.73	2646.17	1079.73		2519.16	8964.99		4728.92		836.971		898.267	1028.35	1894.51	3424.4	2242.7		2458.57	2223.15	124.142					1477.63	191.728	554.661	131.851	4663.94	1214.01
Q8IXH7	NELFD_HUMAN	Negative elongation factor C/D	NELFCD	20	17045.3	6940.02	18258.9	111.073	12090		3607.6	4770.65	5562.51	5428.76		4382.34	5632.31	5203.4	3874.27	3393.05	1940.94	1897.46	6108.15	3858.97	5482.98		9845.99	11923.4	2679.08	6904.71	5048.35	6344.43	5683.6	2253.69	414.081	924.761		5487.44	6992.05	4851.87	8266.54	11530	2993.86	6303.3	6142.12	5092.52	5607.39	4632.34	5067.93
Q9UF56	FXL17_HUMAN	F-box/LRR-repeat protein 17	FBXL17	8		9818.17	1362.19				14249.1	3278.04	2359.34	4966.43		2056.07	7651.54	4233.11	7459.52	7498.49	1238.9	1388.87	1558.13	1368.22	5584.61		4346.22	7165.08	6661.45	6064.1		946.529	396.647	435.146	521.376	242.257		549.434	8782.4	1207.3							339.275		150.534
P14324	FPPS_HUMAN	Farnesyl pyrophosphate synthase	FDPS	66	14705.4	24512.1	21382.8	13753.1	17132.2	22081.2	248449	312237	232329	269265	43830.5	206061	371034	309228	306248	307345	92847.6	95901.8	143688	120059	104563	18319.8	84838.1	79235.9	131841	146619	86065.3	88962.6	56173.9	55656.7	52407.2	54491.7	51632.7	125112	86402.9	165706	20322.5	21586.2	17789.6	8838.57	10797.8	15928.7	54453.9	14018.8	23215.6
P15408	FOSL2_HUMAN	Fos-related antigen 2	FOSL2	14	455.65	11046					1512.41	496.558	303.071						8293.43	25247.6			137.973	96.4612	938.891				1044.98	672.058	1374.41	791.888	32028.5	699.426	400.119	966.337		7954.44	6230.72	663.015	1844.45	24805.6	24863.9	197.776		418.273	446.182	6040.7
P20338	RAB4A_HUMAN	Ras-related protein Rab-4A	RAB4A	15	13116.7	88958.1	93972	24317.1	23435.5	30004.5	22713.3	119292	16524.8	119508	17393.3	21922.3	26659.9	108244	17880.4	27699.9	106096	4110.89	24520.8	34460.4	46625.1	23415	37820.7	29898.3	29517.4	30452	23213.7	24899.8	25414.5	11230.8	90399.2	90958.5	31657.5	2345.21	20255.5	17975	50934.2	50011	61619.2	32257.9	35571.2	36002.4	58698.7	60159.1	59077.4
Q7Z422	SZRD1_HUMAN	SUZ domain-containing protein 1	SZRD1	6	614.379		389.492	2179.11	3445.91		7685.69	6616.45	8662.43	6761.11	3313.03		7517.23	7542.98	6719.82	880.149	2616.25	7632.19	4259.8	6328.46	5374.22	4736.51	6770.47	3623.47	4607.91	3951.12	4557.63	5276.36	3517.12	3570.77	4331.08	4665.34	4418.43	3965.12	3769.4	4744.02	3051.42	1539.55	1126.82	2170.71	856.055	260.912	1719.34	1816.61	2187.91
Q9BTA9	WAC_HUMAN	WW domain-containing adapter protein with coiled-coil	WAC	24	5196.61	6563.53	4461.01	997.435	488.784	355.056	4578.45	6069.99	7008.21	8964.26	8480.37	8223.94	5571.35	3095.24	3930.56	3309.42	3169.5	3812.54	4820.38	15581.6	4235.27	785.181	4201.82	6488.93	3628.68	4933.14	1841.83	4629.45	20514.7	3763.42	3115.86	3546.67	449.954	2921.52	899.642	1652.63	4133.91	11631.8	3277.55	3330.84	3719.89	3499.14	1456.6	1697.32	3779.82
Q9NSP4	CENPM_HUMAN	Centromere protein M	CENPM	4	452.668							1068.98	521.554	452.592			544.504		149.713		1015.97	1197.92			470.793			340.114		1774.32		674.987													1104.03	779.076		741.943	1222.33
Q15417	CNN3_HUMAN	Calponin-3	CNN3	19	76956.2	79474.4	81348.9	48908.2	51810.9	52692.7	13239.2	124148	18412.2	18675	61379.8	22016.1	29990.1	15554	16921.2	14092.2	21097.3	14778.9	6128.44	3388.08	95652.4	61216.8	12606.8	107161	107894	97823.1	18634.8	11102.5	11764.5	8435.1	102965	7864.05	58611.9	16003.3	85858	20044.9	9328.13	6065.48	39201.5	18071.6	17642.3	19289.9	24529.4	34741.3	36280.4
Q15418	KS6A1_HUMAN	Ribosomal protein S6 kinase alpha-1	RPS6KA1	50	38666.2	45006.6	55962.3	44052.1	12484	15775.5	222427	15063.2	47875	16751.3	12846.9	14551.3	18183.8	15754.2	17929.3	25456.4	16381.6	12000.2	13091.5	10974.4	9528.08	6647.22	15673.6	16767.6	16955.3	39385.8	12183.5	13991.5	9079.42	8894.23	56516.7	13169.4	8649.97	24574.7	18657.7	36853.7	12388.8	14323.1	14338.2	6967.98	14356.8	6003.49	13718.1	21454	8886.05
O95782	AP2A1_HUMAN	AP-2 complex subunit alpha-1	AP2A1	62	111965	94100.5	130362	73525.2	64956.6	131359	67329.4	74350.8	65970.8	67896	40136.3	80812.8	59694.1	52954.7	64140.1	50535.1	50893.4	46283.2	67720.9	71511.9	59697.5	44602.4	58748.5	63249.3	65997.2	65918.6	60792.6	72939.1	102394	53204.4	50049.7	51637.1	49290.3	45877.9	66982.1	64617.3	69247.8	48348.4	52639.7	37657.1	36591.3	65477.9	46018.5	42428	58300.4
Q9H1E5	TMX4_HUMAN	Thioredoxin-related transmembrane protein 4	TMX4	7	2066.72	8469.29	6651.58	2871.69	10258.6	10616.4	1954.55	3776.62	8903.09	1838.07		1427.94	7283.41	1346.75	2131.48	3367.04	2095.17	2618.25	10565.2	1694.36	1250.48	248.985	2774.6	3687.23	4292.67	6003.73	1251.41	1856.17	1457.33				190.002	1446.67	1601.72	1462.84	5643.36	2950.94	5230.18	4104.43	987.158	7367.86	2517.68	2796.31	2842.23
P34059	GALNS_HUMAN	N-acetylgalactosamine-6-sulfatase	GALNS	11	21076.5	19816.6	19949.2	2855.21	3000.85	4570.49	3436.06	1515.26	616.535	2893.23		683.653	774.911	735.85	5718.21	1626.11	1544.52	923.871	1311.85	1477.57	277.712	2588.21	300.104	900.735	556.555	602.658	381.298	637.488	697.447		128.346		446.315	346.712		956.248	1604.4	656.684	1277.07	347.157		595.013	473.772	749.435
Q9NY35	CLDN1_HUMAN	Claudin domain-containing protein 1	CLDND1	4	1248.34			1100.25	1081.01	1158.37	513.251	440.002	1323.39	228.13			560.285	1335.89	81.3106	889.243						3188.15	906.101	796.623		559.667									13693.2	135.274			668.302
O43808	PM34_HUMAN	Peroxisomal membrane protein PMP34	SLC25A17	8		208.291	8690		3283.2			399.853	4058.6	3260.71	691.197	632.849		222.405	299.098	585.294	1244.88	776.203	4650.01	601.15	446.297	2514.36	178.416	238.906	2015.58	1133.09		209.732						1023.81	381.878		818.54	595.338	2017.77	539.923		533.172	389.218	1327.59	676.246
Q8N4S7	PAQR4_HUMAN	Progestin and adipoQ receptor family member 4	PAQR4	4					460.646			942.745			3302.71						593.42	1396.23					649.666		1593.44			2540.22	3250.57	1072.69	38197.8			594.392	705.032							32139.3		34804.6
O43156	TTI1_HUMAN	TELO2-interacting protein 1 homolog	TTI1	27	14377.1	8776.65	6599.48	20112.3	1116.33	5835.89	5659.9	60969.2	2321.98	12098.4	3152.41	2984.39	2145.56	1650.66	1973.69	4433.17	1841.58	31179.4	6890.92	2747.25	6522.87		9125.97	15280.5	12874.7	8394.03	6535.33	22269.5	3370.88	1520.6	3326.84	24839.5		1162.76	4661.04	1791.05	19294.4	30881.1	4632.02	9702.23	7680.47	9291.38	4926.49	7944.74	7946.42
Q9NWT1	PK1IP_HUMAN	p21-activated protein kinase-interacting protein 1	PAK1IP1	20	8801.01	11169.7	7920.96	6310.73	6203.21	6681.51	9623.03	3221.65	3274.25	5278.02	6488.96	4580.26	5987.48	8418.26	5553.57	11534.7	14397.2	5457.51	7402.87	4776.78	4966.99	1679.32	12506.7	8847.03	8010.46	9976.46	3035.94	14785.9	17004.6	7601.14	8160.79	4758.31	869.864	7297.7	6617.18	3652.77	21027.6	7863.02	3185.19	7536.56	10084.9	10010.8	3754.28	51185	32368.4
Q6ZMB5	T184A_HUMAN	Transmembrane protein 184A	TMEM184A	6	483.061	464.672	20705.9			767.825				1737.49		162.242			593.286		1552.85						419.091					106825	1202.78	358.507		11474.5					3032.14	370.03	490.274	678.886		725.567	19874.2
P29083	T2EA_HUMAN	General transcription factor IIE subunit 1	GTF2E1	24	12860.9	11141.5	11281.5	5967.96	158.932	221.752	456.726	7745.37	413.85	19107.7	3317.02	1949.75	536.893	751.604	1997.45	6889.77	6973.29	385.908	2110.63	4237.46	8651.9	6390.64	16900	1104.6	1031.47	5151.13	241.981		253.87	2747.75	5062.19	3091	1399.1	1668.52			19073.8	1566.22	16319.9	926.821	2060.91	614.738	874.113	1177.94	864.544
B3EWF7	EP2A2_HUMAN	Laforin, isoform 9	EPM2A	3	4809.25	5735.37	3460.75	6357.93	6831.3	6365.26	5179.16	4173.67	3606.28	3985.72	4155.32	4689.41	4651.39	4942.89	5084.76	5075.3	6520.16	6572.58	10518.5	5659.05	3969.52	4421.9	4228.42	6317.32	6189.92	6606.96	5195.86	6107.69	6176.19	6549.59	7020.36	6048.9	4057.84	5977	5746.7	5487.89	8050.26	7566.71	6541.09	6244.85	6449.13	6175.25	4501	5283.48	5426.2
O75380	NDUS6_HUMAN	NADH dehydrogenase [ubiquinone] iron-sulfur protein 6, mitochondrial	NDUFS6	14	36108	33652.8	40477.1	1836.36	520.97	385.431	18226.2	12553.5	3124.44	7631.11	10410.6	4894.51	4146.29	5890.65	9190.06	7346.72	4039.63	6079.06	6047.21	6160.46	5074.97	421.11	6510.71	4813.37	4621.55	8483.71	3386.91	3312.57	2719.36	415.438	482.653	329.415	10422.1	6477.56	5672.88	2962.31	5824.22	5279.33	7205.26	4048.4	3046.43	2989.74	5896.73	6341.58	7412.67
Q9NX38	ABITM_HUMAN	Protein Abitram	ABITRAM	6	2454.67						193.092	23962.8	293.471	1367.95		635.725	3203.27	98.2985		1258.71	417.919	107.55								3318.44	465.042				2973.75	2712.34				18792.9
Q5T9L3	WLS_HUMAN	Protein wntless homolog	WLS	15	1205.96	6521.42	1309.03	2313.12	212.708	2730.07	226.298	5168.21	3844.34	4858.84	830.044	2065.82		1206.31	4530.73	2814.59	2583.36	3628.5	335.229	2475.57	2923.01	2731.32	2042.42	2801.52	1929.88	690.246	4208.24	979.128	2675.48	4476.43	5400.6	5292.47		5936.96	4434.01	2150.57	1850.4	5567.14	4704.24	15724.6	9905.84	23053.2	17611.5	28160.6	4960.2
O14613	BORG1_HUMAN	Cdc42 effector protein 2	CDC42EP2	7	93.2792	354.403			456.537	1575.02			953.401	1432.09															94.1542				1022.58								427.333	412.793		396.247	634.712	561.956	740.003	1995.85	419.629
P10074	TZAP_HUMAN	Telomere zinc finger-associated protein	ZBTB48	10		6466.56	997.536		4389.69	84.4322				1860.9								508.876										20047.8								5316.12								20139.1
Q13630	FCL_HUMAN	GDP-L-fucose synthase	TSTA3	17	8448.47	11012.6	8033.62	3644.16	1817.63	4522.23	12671.3	19116	19524.7	17880.6	18439.1	11196.2	11348.5	12370.6	20305	12207.2	15455.3	10725.4	10976.6	8019.97	12749	18775	18442.1	9788.93	9064.91	9151.53	30371.5	29373.1	24081.4	28627.9	39482.8	32171.3	19671.9	23624.2	31371.4	21797.1	12036.5	30588.1	13570.8	10868.3	7198.99	20656.2	8331.84	11229.1	10862.5
Q9Y3D7	TIM16_HUMAN	Mitochondrial import inner membrane translocase subunit TIM16	PAM16	10	18450.6	12705.1	19089.1	18161.3	18080.9	16095.2	10712.9	7934.87	18599.7	6689.64	11695.3	8652.75	22361.8	9853.19	19174.5	9024.96	148223	8266.08	11612.6	13553.8	7231.08	8363.38	5710.6	1853.19	5321.95	5845.63	11254.4	18372.8	6614.49	6186.7	6835.94	6298.47	42105.6	203646	6899.34	5344.44	15743.8	13959.8	21408.1	14968	46397.6	89968.9	14597.4	98545.5	9959.46
O43493	TGON2_HUMAN	Trans-Golgi network integral membrane protein 2	TGOLN2	10	10879.9	14428.1	12782.7	22455.3	15263.8	15119.5	3653.44	38855.8	1593.07	2128.98	5567.02	7682.15	1781.7	1662.42	5169.04	1743.41	1571.28	1830.31	6134.28	4854.21	23809.7	7830.5	7098.55	10173.6	2983.6	3620.82	3114.56	2848.58	2913.91	3722.54	4348.54	3369.37	14342.5	3616.46	3508.28	3702.87	2307.01	4218.84	5305.75	8040.59	7745.7	6325.27	6778.28	4679.13	4362.91
Q9UBS9	SUCO_HUMAN	SUN domain-containing ossification factor	SUCO	9	332.232	832.325	10459	175.349			1185.89	640.847		80.2911	6165.76	371.531	10722.8	259.358	5869.11		1353.97			121.213	3730.25		7636.2	3743.37	477.155			13119.3	4793.11	272.861			4682.26		3698.54	3219.77	7733.7	8035.91	2587.23	777.818	1389.72	1318.38	531.638	2116.02
Q5TBC7	B2L15_HUMAN	Bcl-2-like protein 15	BCL2L15	3	613.063	350.499	125.349
Q9H8W3	F204A_HUMAN	Protein FAM204A	FAM204A	9	734.719		1293.63		3923.69			3692.32			108.306		5852.02	1175.84					148.158			11546.8	1916.16	4804.12	518.137	3516.29	168.336			1908.85		1625.27		61.7659	328.568				42767			469.255	37581.5
Q9UN36	NDRG2_HUMAN	Protein NDRG2	NDRG2	10	139.746			580.42			1522.85	1087.24	1441.02	1401.96		1196.06	1290.08	808.258		1190.47	650.237			1351.64	1350.26		181.857	234.123	1047.57	1481.15									1694.36			114.501	1899.06	15903.2	16560.1	2494.97			19037
P36873	PP1G_HUMAN	Serine/threonine-protein phosphatase PP1-gamma catalytic subunit	PPP1CC	38	47717.1	52521.6	53726.7	10591.8	10647.3	10891.7	91763.3	83816.8	72980.1	89371.3	18136.5	111279	118399	103592	101724	83771.7	50500.3	61510.7	64032.8	53203.7	63499.4	11444.2	100029	58177.9	62156.6	83824.7	100001	72091.9	94305	27758.9	32853.4	35456.6	11922.7	70181.2	71644.9	79511.4	35096.4	28817.9	34879.2	47886.5	50020.8	29411	59975.3	47696.8	36000.6
Q14554	PDIA5_HUMAN	Protein disulfide-isomerase A5	PDIA5	31	37348.8	39243.4	34398.7	22269.5	20066.5	18599.5	13820.6	23486.4	41702.1	10742.6	9748.41	177327	10709.7	186546	172939	8187.83	9495.96	12726.1	20302.3	150921	19289.4	8548.03	143574	11702	8008.33	11865	25533.6	5290.8	10558	768.499	3196.04	17511.5	10146	4482.38	41716.4	2009.34	8619.01	4358.4	6787.82	3584.26	3695.17	3962.47	7927.54	15044.2	21271.5
Q9HDC9	APMAP_HUMAN	Adipocyte plasma membrane-associated protein	APMAP	35	138316	176717	151894	131334	198956	159539	30756.8	32401.1	28475.3	26010.5	8073.68	28981.3	39572.3	18580.5	23088.7	23286.6	31180.6	20696	50240.1	25746	43697.4	2645.68	34095.9	38980.6	42857.9	32471.8	23106.8	24341	28747.1	11560.7	8484.88	6051.9	548.619	17094.1	14628.8	18221.3	32581.5	27129.4	30709	25268.8	28511.1	25632.6	23104.3	23534.3	21181.5
A1X283	SPD2B_HUMAN	SH3 and PX domain-containing protein 2B	SH3PXD2B	38	4415.76	3373.58	3606.92	2960.09	1420.13	43116	6378.4	3302.6	7327.11	5779.25	3805.38	7290.22	6426.04	7139.85	10226.4	4154.07	5028.31	8166.64	3767.89	2761.22	5186.26	5388.96	6354.32	7798.2	5084.95	32315.3	15292.4	5680.31	3844.26	2233.51	8093.82	34936.5	5534.57	1057.16	1831.34	12209.1	7424.22	5849.41	3629.46	3798.57	1491.02	1783.5	4003.46	3139.59	2311.94
Q96HS1	PGAM5_HUMAN	Serine/threonine-protein phosphatase PGAM5, mitochondrial	PGAM5	27	44776.1	52561.1	44180.8	367308	37587.1	37624.8	33323.6	21598.6	15118.4	13864.2	38907.3	16420.8	16681	10014.5	20543.8	16443.3	25025.6	37074.5	28927.3	27242.5	32816.4	7209.31	35694.3	36851.7	37849.6	51605.3	44720.2	42692.9	46435.6	37845.8	32891.6	40558.7		32936	36974.4	37726.1	47608.7	43649.6	47875	30848.6	47098.7	43065	66494.3	52291.8	45156.5
Q8IZP2	ST134_HUMAN	Putative protein FAM10A4	ST13P4	24	40603.6	26923.6	19928.8	25538.8	35470.3	28030.7	90370.4	85622.3	64677.3	73764.3	29103.2	64737.7	72377.1	28267.5	211832	26261.4	53417.4	52842.5	39069.3	65114.9	81936.3	2898.65	78812.3	86188.5	71587.6	67784	30503.9	31067	39545.2	32806.9	1171.28	14349.7	7384.4	8285.75	31986	29511	16823.6	20420.2	19604	14187.1	14607.5	12466.3	15675.1	57827.4	19704.4
O94876	TMCC1_HUMAN	Transmembrane and coiled-coil domains protein 1	TMCC1	10	2825.95		8187.84	3381	421.396	12306.7				616.294			203.625	96.4963		400.217		269.748		936.901		626.119					3272.94												2353.42		422.247	364.127	302.246
Q969R2	OSBP2_HUMAN	Oxysterol-binding protein 2	OSBP2	25	10751.1	6129.29	10096.7	14498.2	11006.1	16824.3	74663.6	1461.25	53810.8	1837.2	7768.46	56292.7	67541.1	14232.7	10860.6	13049.5	44790.1	2933.04	4149.73	42043.7	20101.7	8511.8	51617.8	53269	45674.9	46650.4	64172.2	58172	61962.3	60869.3	48789.8	92193.6	6841.87	13268.1	18656.7	54672.2	21950.2	5424.69	4575.71	17632.8	9425.54	3268.8	3314.04	4170.42	2434.23
P51828	ADCY7_HUMAN	Adenylate cyclase type 7	ADCY7	11			554.476				5504.13	4999.64		250.915					81.1552				494.909		371.073		328.613	449.042	402.51				609.082						398.128			3255.32					623.678	1000.7	357.398
Q12769	NU160_HUMAN	Nuclear pore complex protein Nup160	NUP160	61	37040.3	35579	26072.1	16025	18119.3	20167.8	26214.7	27021.4	21613.1	23052.6	3303.26	21863.1	23452	62376.8	15667.6	19919.6	33002.7	30138.6	25778.3	56258.9	29999.6	9210.69	31960.4	32870.2	34400.4	32123.6	21870.2	24181.8	31567.5	35591.4	31826.5	32542.6	10488.8	19283.2	27033.7	26405.5	59852.8	48035.7	58757.4	48281	48255.2	46525.2	37918	51040.2	84199.2
Q96F63	CCD97_HUMAN	Coiled-coil domain-containing protein 97	CCDC97	14		932.453	2247.48			3284.71	2164.97	1981.52	1360.44	1362.68	437.389	25583.4	23078.9	21788.9	1379.64	1306.08	1056.29	2901.97	944.216	718.294	2856.88		2956.2	3374.2	11929.3	2123.19	3874.46	549.523	788.987	444.041	559.291	574.171	7328.44	331.407	962.398	325.816			61884.9		417.392	56152.1	167.741	4017.42	2001.44
Q5SW79	CE170_HUMAN	Centrosomal protein of 170 kDa	CEP170	55	937.387	7071.06	5858.11	4979.96	1008.07	2539.66	6966.45	6226.24	12156.8	4007.93	4248.27	6681.4	8218.9	6243.9	6169.26	4035.56	21547.7	4943.89	6760.39	4112.31	11172	7032.9	5617.55	8950.88	8794.79	16059.5	35136	17509.8	16577.5	12789.1	10978.6	11136.7	12730.7	14768.2	16156.4	15082.5	26369.8	22238	37713.8	29881.6	19115.3	52515.7	14823.1	32781.2	14872.1
Q08722	CD47_HUMAN	Leukocyte surface antigen CD47	CD47	6	3654.71	8239.37	8608.49	14212.6	18361	17921.6	8539.57	10038.2	8751.45	8756.09	8976.6	7497.78	7554.06	14850.8	6322.49	6681.73	5743.02	6880.67	7099.95	5627.61	6075.22	11493.2	7127.58	9576.4	8748.43	8846.3	4776.27	4693.27	4279.92	5904.7	5646.44	6126.56	11460.6	4543.85	5083.03	7252.95	5087.51	4832.11	7016.12	7191.26	6642.85	8152.77	5247.58	6374.01	6153.14
Q15185	TEBP_HUMAN	Prostaglandin E synthase 3	PTGES3	28	67750.7	33696.9	37280.3	8098.85	10668.8	5786.9	55937.2	48914.6	44695.8	16456.3	16931.1	24169.7	36337.6	25891	80172.7	19718.8	41633.2	36796.6	28566	42296.6	46379.3	26891.4	52017	42849.4	38173.5	30343.8	28716.6	31554.7	104604	45130	26790.8	29431.8	23575.9	18235.3	20797	96883.8	41671.4	36536.2	47983.7	14047	28737.2	29416.7	32477.2	15365.8	32218.1
P82914	RT15_HUMAN	28S ribosomal protein S15, mitochondrial	MRPS15	17	9720.81	10106.7	9244.81	14759.5	24021.9	13388.3	7848.93	5991.47	6765.59	7913.51	11543.8	9899.04	11594.5	7057.06	7142.26	6559.29	16535.9	4357.99	4085.22	4019.39	6719.3	4700.73	8168.24	15133.4	12344.2	14773.7	10691.5	7735.98	7993.22	8873.75	9273.79	10957	4792.16	8220.53	15791.5	17938.8	13989.5	14043.4	17458.7	16086.1	17468.1	12752.5	11379.7	10139.5	13673.7
Q96HY6	DDRGK_HUMAN	DDRGK domain-containing protein 1	DDRGK1	12	21928.3	20019	22581.7	4651.5	4690.15	6103	4097.91	6813.79	4726.26	3880.52		2580.58	2706.95	2955.53	2270.99	2829.42	4287.15	5466.26	7218.42	7194.79	7267.67		6475.86	6209.22	7370.46	7876.73	4896.54	5694.14	5312.3	763.087	3028.69	1261.86		6041.82	5735.8	5386.61	7288.57	7335.19	7205.33	6749.12	7304.9	8489.67	5407.93	8530.12	9735.9
Q08499	PDE4D_HUMAN	cAMP-specific 3,5-cyclic phosphodiesterase 4D	PDE4D	17	3629.92	7592.02	5312.72	671.557	3651.19		674.603	5242.57	6101.67	4917.14	207.508	2566.07	699.358		1018.52	3759.4	779.632	3044.11	811.865	1487.66	1109.39		2617.46	2013.55	4002.35	1260.62	12680.5	3273.06	6387.47	2661.71	3079.4	1818.13		20945.1	3268.28	5628.81	4573.69	5719.03	3731.24	2118.3	2155.73	2390.91	2744.07	2997.15	1355.26
P51809	VAMP7_HUMAN	Vesicle-associated membrane protein 7	VAMP7	15	5946.79	5844.42	38501.7	6180.48	9973.35	10046.4	3536.07	5832.1	3683.47	33316.6		5289	5639.96	50098.3	4371.44	3316.8	6039.89	3510.65	32178.9	3026.63	6481.01		8505.4	11893	17662.1	7987.12	10342.1	6167.88	13643.9	2746.58	12685.1	4300.77	149.054	9994.29	4209.27	7424.81	13771.8	11408.6	13202	7499.88	3859.13	8142.51	5123.54	5883.35	8121.77
O15131	IMA6_HUMAN	Importin subunit alpha-6	KPNA5	22	24682.7	18752.2	21950.8	6712.05	6468.57	7343.84	7923.16	8774.11	41740.1	9559.26		10011.9	5537.87	5048.22	525.022	3058.35	13193.7	16096.8	5303.93	2996.94	12652.8	521.032	46754.6	16352.3	13929.3	20351.4	10714.7	19690.4	12183	19745.7	18710.9	17451.2	8867.6	22479.5	11600.9	14896.5	27814.6	25547.6	23024.3	22108.8	24961.9	23772.8	19537.8	23910.5	17870
Q9H270	VPS11_HUMAN	Vacuolar protein sorting-associated protein 11 homolog	VPS11	44	15705.3	22813.6	15753.2	34540.1	14368.6	16999.3	4998.07	26813.8	7975.14	14795	7140.6	19251.6	7902.69	17749.1	13774.4	31712.9	15679.5	15666.7	17219.7	32892.5	19377.8	5227.1	16965.2	25194.3	12590.3	27977.6	8884.31	7227.21	4035.97	2690.1	1872.68	2554.69	4654.03	22087.6	22462	3185.41	12357.2	4851.36	4269.76	8408.88	3467.79	33566.3	2475.71	7019.41	17010.8
Q6P1M0	S27A4_HUMAN	Long-chain fatty acid transport protein 4	SLC27A4	36	44881.4	48870.3	50474.4	27357.8	105093	110694	6658.17	6896	4295.17	184838	4077.22	8519.65	43659.8	5379.11	44669.4	36478.1	17673	10825.2	37825.5	2884.92	7817.67	5148.75	9569.35	26544.8	55944.1	53107.5	20960.2	8965.31	9342.3	1061.31	7788.08	6026.1	7111.1	24874.4	8135.68	8036.68	109201	24749.5	17373.7	16465.9	16143.5	15379.5	14245.6	16061.4	11885.4
Q13426	XRCC4_HUMAN	DNA repair protein XRCC4	XRCC4	19	30279.3	27835.9	28029.5	17821.9	13730.9	4404.92	2781.52	1777.79	3999.84	1797.5	729.906	1446.99	2826.16	3644.65	1648.16	2774.44	221.223	788.375	853.551	1904.94	1794.14	3314.37	6564.27	717.008	5411.35	738.908	6397.04	12676.6	9086.75	9089.08	14359.6	12940.6	6377.52	10382.1	10821.8	3834.16	4127.35	19639.1	36118.5	1154.93	8361.5	5624.37	1406.34	2150.23
Q99986	VRK1_HUMAN	Serine/threonine-protein kinase VRK1	VRK1	33	303.907	2927.06	21204.5	234771	5371.47	238273	12195.3	42265.8	30084.1	28951.5	4030.52	17184.3	46519.5	24895.8	7955.16	11926.2	2862.48	6532.26	14863.2	31246.7	34797.2	1647.04	10949	24239.1	26506	23585.4	6273.19	5741.21	9149.41	2441	1604.96	1743.21	268.288	2885.98	13851.8	11462.4	6929.85	5333.9	7265.99	7807.67	62616.2	67359.7	67531.6	17205.6	42184.2
Q6NW29	RWDD4_HUMAN	RWD domain-containing protein 4	RWDD4	5	2331.47	2013.57	2552	504.215	2593.33	254.56	1218.08	1267.37	823.447	917.618		754.724	1257.31	273.862	165.438	229.142	825.016	1409.68	575.538	2157.88	1111.68		2818.53	1250.41	1309.34	1672.95	1054.96	945.15	1927.77	791.523	2531.54	768.841		917.508	1957.23	1395.45	787.254	1831.97	1524.86	3844.23	465.018	579.332	654.65	1234.32	1330.21
Q9H0X9	OSBL5_HUMAN	Oxysterol-binding protein-related protein 5	OSBPL5	27	4237.6	4642	5034.18	7390.81	3399.58	2449.57	3851.51	14550.6	6630	2838.51		232.739	16403.8	2952.15		2789.89	602.318	2844.78	732.471	3472.06	2345.14	660.891	4311.46	21620.7	830.265	2818.89	6519.88	621.118	6720.45	1508.64		334.307	4112.5	403.72	1382.05	14799.2	4040.13	616.137	1105.16	2109.69	579.248	265.156	4358.9	663.737	1995.55
P13994	CC130_HUMAN	Coiled-coil domain-containing protein 130	CCDC130	7		1407.86	423.348	400.782	1574.14	351.704				1290.87						178.355	767.047																	3863.68					743.843	171.046
Q9UQ16	DYN3_HUMAN	Dynamin-3	DNM3	25	19980.4	21061.7	4029.75	3318.32	2128.46	2783.77	6325.74	14784.7	41657.5	4803.45	14575.3	8907.39	21553.2	9482.27	7111.33	10926.7	6455.76	20984.3	5214.72	99161.8	18938.8		2988.43	3414.89	7252.9	28404.2	21989	8093.46	11874.2	2174.4	18849.5	8184.96		23333.8	14467.5	19748.7	3434.96	2090.01	3008.51	237770	35508.4	122781	1992.02	42656.9	2457.96
Q9ULI3	HEG1_HUMAN	Protein HEG homolog 1	HEG1	6			524.862			334.251	475.033		562.609	1391.74		1278.12	1029.1	570.543					1135.73				1194.85			66.9163	1398.02	130.925	1400.49	1238.02	331.923			97.8413	850.538	509.176	2465.51	2649.12	1969.89	2729.96	7825.29	4145.69	2454.62	2942.65	2896.73
O14929	HAT1_HUMAN	Histone acetyltransferase type B catalytic subunit	HAT1	21	6218	4113.84	4151.06	189.862		1909.87	49387.3	42247.5	37722.3	32945.1		28271.4	32029.2	32224.1	41148.3	26251.7	34175.4	33266.4	33855.1	33282.2	36364.8		32541.6	37637	46569.8	50554	16402.5	25566.5	18505.3	31693.6	11976.6	26545		17096.1	12225.4	10922.9	16624.6	12523.1	20611.5	15570	16224	18102.7	12077.4	12719.3	11203.2
Q6Q0C0	TRAF7_HUMAN	E3 ubiquitin-protein ligase TRAF7	TRAF7	20	296253	9296.27	41114.2		346.939		158684	374.462			251337	2171.9	1581.58	603.061	1304.3		105922	114854					835.491	173516	453.969	6906.31		77368.8		1632.01			273201	57411.7	1115.45	83029.1	114556	832.212	102.685		3103.11	173067	698.213	404.909	828.066
A7KAX9	RHG32_HUMAN	Rho GTPase-activating protein 32	ARHGAP32	16	25279.2	4188.52	12481.6	4521.03	1920.61	11874.5	22371.8	5487.79	4012.08	17054.4	8674.1	6455.18	8767.85	12151.3	27912	11361.3	18974.4	10521.7	8989.81	17988.4	11246.7		7482.28	5597.61	13046	6255.09	3929.64	9673.88	8351.31		6867.51		7262.91	4035.54	4179.08	9689.66	11422.5	4785.97	2251.26	4429.63	3020.68	3063.23	6468.22	10274.9	3316.35
P00492	HPRT_HUMAN	Hypoxanthine-guanine phosphoribosyltransferase	HPRT1	29	7049.81	11964	3947.52	4541.21	6835.76	5931.31	63593.3	71149	62147.5	57355.8	7752.38	65136.7	62380	42825.3	39507.4	52206.2	36217	35045.7	49077.4	49269.2	47657.4	8793.81	45881.8	43693.5	44825	39258.5	78811.3	84471.9	81890.2	29098.2	28585.7	27096.1	7342.28	52035.2	90970.6	50545.3	29275.1	28285.2	32348.2	24194.4	21844.8	19456.3	23292.1	22700.6	23464.7
P14316	IRF2_HUMAN	Interferon regulatory factor 2	IRF2	6		3551.43	4580.01	4250.32						352.215		1794.84	59795.2	569.835	1079.28			975.374	17903.7					651.934		874.306	3018.39							17822.7		333.726	212.189	3079.34		6088.02		6504.38
Q92791	SC65_HUMAN	Endoplasmic reticulum protein SC65	P3H4	9	11217.7	7430.98	10599.6	6271.55	5535.39	3955.14	1507.96	2630.16	1860.62	904.74	120.377	585.534	729.571	4365.61	13351.3	3111.26	2474.06	1461.22	1874.33	1970.45	4180.41	524.819	2777.85	2317.55	2119.73	1855.84	562.592	615.442	506.248		267.006	339.777		544.548	354.424	1006.16	1978.6	6402.19	2471.23	1888.25	2974.57	2366.88	1150.2	3477.19	4076.36
Q9Y6W5	WASF2_HUMAN	Wiskott-Aldrich syndrome protein family member 2	WASF2	14	2796.31	2486.67	3542.59	1709.8	660.594	1011.37	6533.35	2546.42	4187.08	4310.84	2274.15	2302.4	5020.86	1938.34	1104.05	3413	2723.07	2322.94	3518.01	1142.64	2408.2	3312.27	1142.77	2437.45	1563.05	1918.49	1346.31	1317.87	1067.42	1273.32	1886.41	1527.86	4762.03	2779.92	1132.47	14822.6	2884.81	16582.4	3499.02	220.388	1565.9	448.174	997.781	835.316	5789.63
P08603	CFAH_HUMAN	Complement factor H	CFH	14	1643.99	168.898		930.228	8166.3		20057.2	17142.2	13987.9	12250.8	2653.56	18346.5	10304.5		933.633	2730.8	8366.74	477.758	13667.9	8776.74	12503.6	188.7	16437.1	23713.4	16149.5	3924.32	16706	216.945	1864.4		6792.59				124.819	97.0348	13842.1	18575	12421.3		1626.87	364.892	6467.88	5389.95	25406.3
Q9NX95	SYBU_HUMAN	Syntabulin	SYBU	12	3199.22	482.061			147.296					1419.25	121.714	9158.34	970.026				7770.44	1921.98			1067.67					7620.27	3765.06	780.295	2921.31		6414.03	231.536	31204.9	84.9536	6068.55	5219.75		126.373	5319.07				224.303	2445.9	65.7732
O95274	LYPD3_HUMAN	Ly6/PLAUR domain-containing protein 3	LYPD3	3	425.155	794.329	275.627	2077.18	1353.9	231.773											151.416	156.158	357.65	663.669	584.459		194.68	1699.89	1568.33	1325.35	2257.11	1939.37	2555.46	2648.96	2195.54	1599.15		1804.8	2697.69	2654	3867.01	4018.58	3771.11	3856.22	3593.36	4432.21	3805.37	4392.98	4032.53
O15212	PFD6_HUMAN	Prefoldin subunit 6	PFDN6	14	24994.4				467.818		11392.8	80.7823	2725.49	9409.66	4174.52	16474.8	9759.78	6071.21	384.483	8596.7	2715.99	3221.01	6663.34	3320.12	510.14	638.301	2737.54	9828.64	6495.43	1186.53			4814.55	855.954	61936.8	3300.7	1144.33	1625.42		1362.77	3359.71	8933.8	4636.61		3745.3	7370.71	3910.69	4880.93	3341.36
Q9NW75	GPTC2_HUMAN	G patch domain-containing protein 2	GPATCH2	7		714.052									769.011																328.926				1894.63			1288.98	1087.33		368.666		1223.99				932.114
Q9H5X1	CIA2A_HUMAN	Cytosolic iron-sulfur assembly component 2A	CIAO2A	5	5820.25	3890.1		3804.2	17166.1	2544.11	2400.59	3280.06	590.374		1076.52	2412.64	2865.53	2478.86	2161.01	2211.09	1875.91	2961.64	1936.8	7586.26	3927.68	2433.25	3191.34	1058.85	3946.71	6844.03	564.447	772.908	1061.24		2722.73	1208.92	2622.07	1784.89	1739.44	1725.27	497.424		1532.62		2789.48	2618.69	931.277
Q12851	M4K2_HUMAN	Mitogen-activated protein kinase kinase kinase kinase 2	MAP4K2	20	422.707	83.4383	954.916		32334.2	1432.39	7341.99	5927.27		3276.23			2562.95	5894.89	7254.62	4516.15	4928.43	729.611		502.708				42586.9	2874.7		505.729	3522.83	13062	7763.54		98.5573	2461.51	461.036		2262.92	10294.4		11004.6		21556.4		755.376	1466.31	2031.57
P06746	DPOLB_HUMAN	DNA polymerase beta	POLB	19	2986	9230.41	43760.3	6353	2799.92		2801.9	3303.84	2795.45	3548.2		3805.05	1084.47	1066.12	2802.57	4145.74	3960.56	6206.66	10546.9	2475.21	2701.94	703.972	2039.59	1249.95	2192.64	1352.48	5076.49	806.743	2419.35	934.867	1965.66	2090.76		1084.49	6238.97	638.949	323.769		1244.05	11419	232.148		1281.02	1500.02
Q9UDY8	MALT1_HUMAN	Mucosa-associated lymphoid tissue lymphoma translocation protein 1	MALT1	32	105059	4817.83	8513.1	10000.3	8877.6	8368.83	7560.63	3990.22	6658.01	17151.5	13681.8	483.635	4044.51	6263.57	5491.04	21727.1	4975.06	5811.18	5117.79	11883.5	18814.5	6540.08	5329.65	2196.65	5587.8	8367.68	3598.96	3046.77	9366.42	6331.44	6641.79	836.332	6732.93	4024.59	3108.16	8824.8	8269.65	4796.4	4406.6	2359.04	3423.22	5124.2	9061.38	8717.82	2943.93
Q14964	RB39A_HUMAN	Ras-related protein Rab-39A	RAB39A	6	8646.26	84321.6	76819.8	18292.2	19092.4	16711.6	22102	20943.8	16142.1	19805.4	18177.7	21922.3	26278.8	16688.9	17880.4	27699.9	29524.4	4110.89	23895.4	30129.7	44445.4	17168.9	37046.4	28261.3	27758.5	28882.7	20833.9	22251.5	22125.7		90399.2	90115.5	22306.1		17193.9	14544.5	49895.1	51915	57205.8	28674.4	30509.9	30715.9	54497.8	54897.3	55273.4
Q8IXW0	LMTD2_HUMAN	Lamin tail domain-containing protein 2	LMNTD2	3	3723.81	1246.39						3688.69					2126.41	4573.71		3476.05	2077.76	84.9232			3767.83		6933.21		1259.08								8230.25	4034.62					4105.81	8179.19	3499.02	5249.81	2179.64		1285.66
Q32NB8	PGPS1_HUMAN	CDP-diacylglycerol--glycerol-3-phosphate 3-phosphatidyltransferase, mitochondrial	PGS1	13	3826.03	980.075	6350.63		7596.76	6918.66	2662.57	6289.83	1870.48	1229.24	475.282	1171.02	4198.52	4690.83	3299.45	1585.66	3017.11	889.353	486.463	1505.79	427.074		622.13	1307.38	1443.04	2312.35	1305.64			460.718	2494.88	957.3	338.621	1366.68	3948.15	2836.84	1663.76	2667.36	3053.08	1661.61	2083.4	1832.1	9239.06	4246.65	4460.54
P31948	STIP1_HUMAN	Stress-induced-phosphoprotein 1	STIP1	115	233288	305532	263897	95289.3	113906	92671.6	217879	223183	187682	362269	84007.1	272192	252633	247630	632766	223404	231668	174416	246003	325897	223591	115096	226873	228848	237288	187603	279495	226905	243410	130745	133589	146514	112144	209782	267337	176698	150835	483838	467884	97144.5	73856.9	116010	471197	103568	119842
Q8TEL6	TP4AP_HUMAN	Short transient receptor potential channel 4-associated protein	TRPC4AP	14	1897.71			180.888	11753.7	1111.84	15387.1	127.689					987.508	243.713	8468.81	1540.04	1897.89	341.534		3598.05				317.627		1698.03	3141.32		3719.02			4662	1980.9	27401.2	25119.7	25983.4	4959.16			1407.2	167.505		163.833	8942.23
Q5U649	CL060_HUMAN	Uncharacterized protein C12orf60	C12orf60	5											329.164			1674.67		2131.13							505.357	955.709	666.323	1201.73				832.438			774.808	252.375	4297.59	594.935		159.094		299.309
Q9BRX2	PELO_HUMAN	Protein pelota homolog	PELO	21	30720.8	17907	22051.2	9996.43	12817.1	10298.7	10306.6	17146	5548.16	4118.13	11320.9	6523.95	32586.6	5605.1	5710.26	4069.15	5349.4	4692.37	7868.13	4665.39	8911.09	41029.5	5821.94	6581.47	8974.15	31566.5	3670.09	4785.93	3678.62	3616.65	4112.99	3816.87	11584.8	3550.47	4515.51	4727.11	9947.42	6613.59	8332.95	6388.99	8742.83	6955.17	7371.49	8219.69	5044.18
Q8WWK9	CKAP2_HUMAN	Cytoskeleton-associated protein 2	CKAP2	22	9813.82	2164.11	7844.07	389.487	730.325	8516.81	4321.82	4250.4	3729.21	3790.06	254.48	3262.87	6497.6	1742.5	4370.18	5275.95	4068.42	3682.54	5792.64	7484.24	5212.86		5846.58	11042.6	7989.72	10838.2	1510.04	5325.95	1388.92	1801.47	1600.51	1583.86	95.5212	854.427	1919.99	9510.02	3538.93	5037.22	3206.21	3006.4	6556.06	14958.5	7503.26	9394.98	6330.91
Q9BZK7	TBL1R_HUMAN	F-box-like/WD repeat-containing protein TBL1XR1	TBL1XR1	38	8118.4	10864.3	11922.1	93773.4	2271.01	2780.83	19125.5	23395.4	21410.6	16065.6	6682.89	20750.8	12248.2	20702.8	10657.6	11262.4	23032.5	16833.8	19141.1	19818.4	26933.5	1085.71	25606.2	23555.6	23622.9	35400.7	7965.69	6968.51	8824.08	6489.5	11301.5	9539.76	1325.52	7670.41	4550.37	4227.1	16098.7	16799.4	32265.8	36717.8	39491.4	32332.7	30307.4	42266.9	34497.8
Q8TBF4	ZCRB1_HUMAN	Zinc finger CCHC-type and RNA-binding motif-containing protein 1	ZCRB1	5			2558.49				940.635	1140.33	2062.35	1696.47		509.199	636.308	481.565	1434.87	674.713	104.067		532.194	689.855	411.03		265.134	3193.18	1551.92	379.608	1490.53	3065.29	1467.52	1098.33		721.924		572.196	383.24	458.575	3913.23	1367.93	1560.25	1546.02	2314.11	1690.68		221.648	866.283
O60281	ZN292_HUMAN	Zinc finger protein 292	ZNF292	8		976.277		1590.52				1354.79				319.853			1359.06	2838.07		853.585	1076.31			178827	2080.1	19099.5	1356.88	11312.8	1439.75	1233.6		757.8				66.2845	776.258	6407.14			1067.72	337.579		2464.36		1885.76
Q9NY27	PP4R2_HUMAN	Serine/threonine-protein phosphatase 4 regulatory subunit 2	PPP4R2	21	2434.57	8309.03	8479.59	2019.81	1929.98	4162.46	8468.68	7641.34	42567	5403.34	2343.9	4153.22	5244.23	18651.5	5056.37	4878.72	4340.37	4743.25	4110	4289.08	5334.34	8616.89	13395.9	7995.53	8866.55	124778	2760.8	88662.2	6234.53	4867.63	3551.52	4192.21	4011.78	6063.48	7032.5	4898.45	3053.98	12403.1	12843.5	71783.8	63778.4	3819.42	56963.3	59329	56241.8
O00115	DNS2A_HUMAN	Deoxyribonuclease-2-alpha	DNASE2	8	15043.9	16155.1	15968.7	8274.69	798.399	8215.04	7882.99	9044.22	7736.97	7363.66		9470.4	9337.5	7467.82	8640.44	8535.41	4416.56	5457.17	5660.57	6290.22	9971.25		7616.28	9756.19	11338.5	6849.25	7609.21	8619.23	8945.23	5257.01	6938.34	6587.56		8372.66	5307.26	8208.27	12772.5	9243.42	10778.5	4607.24	5066.09	6492.75	8862.19	7339.02	3457.23
Q6ZTW0	TPGS1_HUMAN	Tubulin polyglutamylase complex subunit 1	TPGS1	6			6380.97					841.751								267.261							116.967	2082.97		1552.52	44408.2		332.376					934.608		147.685			680.369					609.454
Q16881	TRXR1_HUMAN	Thioredoxin reductase 1, cytoplasmic	TXNRD1	66	46439.4	22389.4	79564.7	19014.2	8972.19	23496.3	140080	124517	118615	99314.5	44814.3	102397	100730	131003	134704	132410	87364.1	106480	104442	91004.6	117940	43125	115435	93220.4	98583.9	103971	120750	154760	204132	144952	130558	158655	37956.2	164234	133685	166154	117022	81533.9	83695.7	51378.1	49521.2	85852	65160.8	65204	58290.9
P07478	TRY2_HUMAN	Trypsin-2	PRSS2	5			1955.75					207.314		4530.63		1104.63							55.5656		674.4		4547.47				2434.36	1602.96
P49336	CDK8_HUMAN	Cyclin-dependent kinase 8	CDK8	21	11513	13521.2	730.722			8592.7	464.27	1241.52	5288.81	527.817		5382.88	3558.13	1789.01	10071.5	455.699	609.101	11095.9	9512.19	520.384	2185.94		4485.83	2260.87	1845.52	26289.6	9786.47	8034.03	9693.07	404.019	665.391	507.485		477.181	1763.06	738.742	1806.2	727.294	5031.45	3022.31	3002.85	324.321	9157.69	1893.92	16428.2
Q8NBQ5	DHB11_HUMAN	Estradiol 17-beta-dehydrogenase 11	HSD17B11	16	26033.1	40265.2	39213.4	9230.93	10126.6		909.121		711.63		6069.36	298.041	2610.86	6471.01	15828	4258.08	739.398	834.933	3451.45	828.504	4511.75		747.608	2126.68	1561.15	854.369	228.421	2945.81	341.9	7005.82			7664.59	1481.42	3343.28		7308.89	4348.66	4398.3	4635.5	3458.93	3323.89	2374.88	2840.49	2434.26
P25398	RS12_HUMAN	40S ribosomal protein S12	RPS12	38	88518.9	15460.4	88447.2	150630	1848.02	150059	50817.4	102706	104479	76695	29117.5	33686.5	60275.3	49706.2	48531.6	72404.6	87332.2	16694.2	85913.2	88662	24673.9	18895.4	30948.6	52664.1	56342.1	21162.2	50856.4	70932.7	54401.3	23376.7	46350.8	45391.2	25508.5	74198.5	76622.7	37170.1	72210.9	20572.6	83186.4	9502.87	73451.6	79464.7	75265.1	13613.4	15399.8
Q14192	FHL2_HUMAN	Four and a half LIM domains protein 2	FHL2	21	17680	19628.1	15683.4	8444.32	12309.5	137660	84765.7	78915.6	68141.3	68453.6	38999	60714.6	72253.6	65091	59510	66638.9	47853.6	46924.3	46611.5	55976.2	70020	62550.4	68095.8	59650.7	59322.6	60018.1	43585.8	34874.1	24927.8	13161.2	12615.1	11765.7	33748.9	17355.1	23187	22265.5	58860	25103	26034	37694.5	34093.6	55800.9	16233.7	17205.4	17256
Q05048	CSTF1_HUMAN	Cleavage stimulation factor subunit 1	CSTF1	18	13240.7	14967.5	11873.5	3581.61	3084.07	3451.05	17226.8	5969.01	6785.57	4194.65	1136.91	6436.34	9432.61	19643.9	6384.66	6255.3	8843.22	14946.9	3874.16	5147.88	4514.68	2040.99	11107	11508.3	5422.74	10836.5	7254.32	10646.2	8600.46	2551.7	7238.7	4708.34	2140.89	4203.35	5995.28	5821.75	6489.2	5749.1	7593.94	4875.61	4173.79	3452.61	5813.76	3138.15	5678.37
E9PRG8	CK098_HUMAN	Uncharacterized protein C11orf98	C11orf98	9	4213.93	42584.7	5477.73				4386.66	3939.03	2185.2	2325.74		2527.23	1929.37	1187.76	1590.35	778.524	2059.66	1561.1	2072.43	1719.49	3328.16	1701.03	2881.5	2480.27	4107.67	2457.95	3354.44	3201.28	4059.03		9037.2			805.203	443.051	628.433	3117.61	3063.65	4298.21	798.413	1033.8	939.158	2912.51	2599.68	3237.78
P30411	BKRB2_HUMAN	B2 bradykinin receptor	BDKRB2	7		216.863						3755.69		2561.05			4831.9				4007.74		219.196		6500.02		766.869	27394.1	234.604	2436.04				5181.22	1488.35	63.8709		67907.1	81190.7	20951.7	39512.3	33948.3					158.553		2139.36
Q6DN12	MCTP2_HUMAN	Multiple C2 and transmembrane domain-containing protein 2	MCTP2	11	7350.92	2519.61	154.148		8148.57	585.081		703.579	704.82		1840.76	219.967	3615.42	8373.44	5300.17	9582.18		3117.26	5997.89				464.8		1218.77			8661.18	1972.72					7785.92				402.024	2379.63	3352.03	7156.52	503.164		1071.42	377.521
P41223	BUD31_HUMAN	Protein BUD31 homolog	BUD31	14	1101.86	1468.72	1198.03	2647.39	1218.59	1391.54	17354.9	15838.5	11018.3	11925.4		9961.96	11759.5	12893.1	9896.41	9967.05	11947.4	13569.2	28744	16127	16222.8	661.168	17906.6	15979.1	15089.3	15506	8450.35	8320.59	8327.17	8587.83	6613.42	7256.68	457.335	9062.89	3703.41	3760.59	3102.09	5558.67	6039.13	4064.8	4490.2	4674.17	5098.62	5576.39	5734.21
Q8IVT5	KSR1_HUMAN	Kinase suppressor of Ras 1	KSR1	23	2176.38				2468.08	6907.89	910.174			712.314	162.339	197.016	968.695	9066.24	63141.1	278.356	1540.29		2431.09	978.526	389.173	636.516	2255.22		288.031	659.337	634.397	1042.85	2863.03	202.923	978.712	734.926	915.675	13409.7		2450.42		1063.14		650.78		2653.35	1738.82	520.749	702.678
Q9Y4D1	DAAM1_HUMAN	Disheveled-associated activator of morphogenesis 1	DAAM1	26	840.619	945.477	2066.4		3078.45	1630.32	5820.42	6332.88	566.715	116.646	230.473	11201.1	544.006						20037.5	56453.7		1671.49			2188.16	1558.07	3156.32	6575.96	2863.41	162.181	60.4664		1770.64	9891.58	311.145	4948.37	3197.33	970.312	767.534	27470.2	471.912	353.422	383.951	20113.7	2201.57
Q9HCM4	E41L5_HUMAN	Band 4.1-like protein 5	EPB41L5	16	15351.6	8735.94	6843.92	7286.56	8672.28	7062.26	791.176		206.761	496.697			1289.63	353.328	1420.53		925.056		1062.13	1313.98	6556.86	1661.28	734.214	3514.97	2230.42	811.365	1730.57	13426.6	731.724		1176.57	192.21	1924.51	919.166		638.942		863.97	12161.7	191.894	759.222	1847.98	6450.16	3241.23	1283.31
Q8TCE6	DEN10_HUMAN	DENN domain-containing protein 10	DENND10	14	2913.51		2731.15	3425.09	2925.96	2282.1	2598.21	1227.64	1030.14	1216.15	1169.36	2216.53	570.438	942.008	1651.65	1291.09	1061.19	323.131	789.412	1176.35	767.669		386.239	733.332	1863.79	991.325	17976.5	673.23	1566.29	1714.21	2154.32	1227.55	2266.82	10097.7	14547.3	1291.57	487.495	763.745	197.514	381.803	363.29	149.517	3520.02	159.081	587.896
Q96SI1	KCD15_HUMAN	BTB/POZ domain-containing protein KCTD15	KCTD15	19	191409	22827.9		3276.5	2079.75	2214.59	9441.52	5809.49	399.249	3771.12		1420.82	2370.88	1275.77	1714.62	1790.82	616.111	2849.54	1844.58	653.317	4702.35	2088.52	412.927	6724.42	3270.21	13410.1	1179.21	4102.78	1296.64		1258.81	2611.15		2138.86	1673.91	2180.08	5328.11	16112.4	11568.2	73056	34131.5	15752.2	3720.07	1909.72	3982.97
P69892	HBG2_HUMAN	Hemoglobin subunit gamma-2	HBG2	4			91.9791				4380.87		154.51					310.668			1809.16							4049.25	6313.52		1903.51
Q8TD22	SFXN5_HUMAN	Sideroflexin-5	SFXN5	6			351.108		633.519	1076.94	71349.9							592.591					240.736				475.034				183.81	2010.37							601.169	473.602	3066.04	204.285		3595.1					476.07
Q9UKT4	FBX5_HUMAN	F-box only protein 5	FBXO5	7	42234.7	35966.3	4923.78	282.781	35868.5			490.541	186.866			164.285					721.087			1752.38																									7083.06
Q15599	NHRF2_HUMAN	Na(+)/H(+) exchange regulatory cofactor NHE-RF2	SLC9A3R2	22	5147.23	20628.3	6240.3	2196.63	2543.54	3439.93	7937.01	7049.18	4245.49	5141.37	6625.33	3260.58	6075.43	3855.06	5029.33	10409.1	6256.94	4639.17	5089.51	4733.7	6297.12	1939.67	4169.05	3625.49	4682.71	4616.94	25018.7	978.544	1006.24	1296.13		5766.05	7461.64	821.079	1185.49	830.785	815.261	11055	493.781	2657.72	608.289	1605.72	1260.15	516.724	2057.23
O75916	RGS9_HUMAN	Regulator of G-protein signaling 9	RGS9	2
Q5HYA8	MKS3_HUMAN	Meckelin	TMEM67	15	1155.96			420.858				15547.1			5104.51	18896.5	219.74	738.412	1252.58	27138				21630.3	4772.69		280.046		1924.42	8020.23	914.254	2580.98	4289.09	1615.4	278.734		4428.3	12684.5	386.552	1530.92	532.93	223.179	297.27	2600.63			1136.31		1651.1
Q6NXR4	TTI2_HUMAN	TELO2-interacting protein 2	TTI2	12	1788.81	1009.37	6503.06				1420.75		2021.42	331.597					1124.75	270.552	766.614	1493.8	289.067	744.006		2322.82	1405.29	107.221	302.028	1162.56	797.824	1212.14	372.83	593.739		686.657	2605.76	4565.72	3805.82		2334.89	1337.28	1112.26	745.381	2090.02	1317.07	1379.48		464.09
Q8TEV9	SMCR8_HUMAN	Guanine nucleotide exchange protein SMCR8	SMCR8	19	281655	65972.9	32937.8	19652.3	8777.38	21701.2	9266.44	2021.23	7145.53	400.792			17285.4		113930	309.322	4747.66	3099.63		5114.67		4786.31	300.93	560.77	1331.33	216.466	69.6674	390.417	1332.42			3133.31		24390.3		403.546	258.171	255.473	8600.59					3171.96	2678.07
P61073	CXCR4_HUMAN	C-X-C chemokine receptor type 4	CXCR4	3							1341.75	2578.55	1312.15	2635.11			669.211	501.607	428.153	434.507	7242.41				12206.6		236.186	121.96		833.239	449.532	322.237	409.725					1682.65	1264.81				287.209				171.134	259.908	387.047
O95167	NDUA3_HUMAN	NADH dehydrogenase [ubiquinone] 1 alpha subcomplex subunit 3	NDUFA3	4	6894.23	5259.68	4808.64	4867.73	6049.67	6093.58	2170.74	2638.74	1984.07	2047.06		1761.71	1515.92	2284.05	1243.53	1121.85		1050.38	516.968	2407.4	3151.88		562.145	7921.32	5883.9	2616.87	1321.06	944.139	1259.36		2250.25			742.444	1291.28	731.731	4001.24	1328.97	1942.19	2721.53	2556.38	4255.83	3516.95	3699.6	3546.95
Q7Z2K6	ERMP1_HUMAN	Endoplasmic reticulum metallopeptidase 1	ERMP1	34	18010.5		21141.9	48486.9	9225.3		18234.1	9859.59	7853.91	13514.9	10372.3	13823.6	18379.5	114331	12394.6	120392	86542.2	90336.3	5102.49	3328.29	6318.96	13940.7	16408.9	6816.9	5757.57	16623.1	2439.87	52278.2	4401.2	2644.37	89138.1	93982.6	1425.52	4673.84	138814	3824.43	66154.1	67109.5	11341.2	7817.13	7286.13	86511	9401.39	40376.7	14413.7
Q99590	SCAFB_HUMAN	Protein SCAF11	SCAF11	49	20501.5	21148.4	14419.5	65436.9	28640.7	23097.9	10290.4	13345.2	11854.9	9991.09	2467.77	10314.8	20708.8	196578	20682.9	11841.4	12384.5	14185.8	6644.26	47249.4	61264	14432.5	67672.5	20235.3	19281.3	20642.9	9700.56	10523.4	7694.24	8448.29	15819.6	17805.4	3738.14	12564.7	55390.3	58156.6	12773.6	18799.9	27374.5	9817.26	12722.1	3400.61	9080.84	6014.68	6481.05
Q6JQN1	ACD10_HUMAN	Acyl-CoA dehydrogenase family member 10	ACAD10	41	25072.4	4904.94	8055.73	6126.77	5901.09	9463.63	14895.7	12503.3	29106.5	19717.9	4168	9781.26	3987.22	12598.9	12644.9	10291	19208.5	9928.47	16180.8	5658.16	6335.14	11967.2	5186	1217.12	7332.14	11579.4	19497.7	7415.94	24083.8	883.081	7192.87	3654.04	6745.97	5749.12	4085.6	1712.04	4908.36	4090.16	1877.3	1481.85	649.508	1692.12	4401.4	1287.68	1799.47
P02771	FETA_HUMAN	Alpha-fetoprotein	AFP	4	4670.22	5149.93	3600.15	4923.35	9285.72	8239.77	2033.27							56020.4		258.458	986.492					2726.93					821.807	657.035	374.977	1250.25			3222.3	454.831	1100.17	1030.89	3444.79	2762.73	4766.16	4545.69	4271.27	5262.94	5473.89	4328.73	9049.22
O94760	DDAH1_HUMAN	N(G),N(G)-dimethylarginine dimethylaminohydrolase 1	DDAH1	28	108764	98676.4	29109.4	12216.7	5514.34	4603.4	14607.5	13593.8	15640.2	18387.9	44292.6	18309.5	20694	15131.4	134233	19207.9	12174.1	9442.84	11739.6	13914.2	21872.9	19814	18417.8	55635.2	10325.2	4225.06	11934.4	8817.1	49893.8	3430.43	7386.44	1070.33	19311.8	15693	8366.1	11118.3	3942.87	6416.01	6102.17	4516.93	2555.06	4909.1	4049.48	26294.7	23312.8
Q8NBK3	SUMF1_HUMAN	Formylglycine-generating enzyme	SUMF1	6	18198	17885	18190.9	11803.1	14737.4	15792.2	2230.84	7822.13	2015.51	3377.97	52107.9	2122.16	1217.76	2783.04	1708.17	5598.36	3555.01	4160.72	1686.42	4671.25	2624.31	1831.42	2912.49	3403.83	4057.41	3110.11	5309.59	5072.63	5664.95	4054.79	3156.64	3595.99	2213.65	4861.25	4136.44	3567.37	8319.81	5772.63	4205.23	12565.3	24830.6	4022.26	18486	16868.1	21748.7
O76024	WFS1_HUMAN	Wolframin	WFS1	19	17559.7	21490.8	22078.9	12372.8	28916	11759.4	2382.78	2861.53	1598.94	6235.07	6838.59	5098.1	2621.59	5276.32	3733.22	3680.98	4758.57	3986.96	1842.43	3031.23	7443.78	7306.9	5551.35	5850.32	6670.06	12547	12165.3	15509.7	15629	17712.6	16949.4	17939.5	8898.7	16523	15622.9	16009	18347.9	18718.1	18246.7	19484.1	19728	26422.1	18119.4	17842.5	20138.6
Q9Y2H0	DLGP4_HUMAN	Disks large-associated protein 4	DLGAP4	16	11559.6	7912.83	4807.95	9124.32	5053.79	6831.75		10072.4	365.073	325.541		4269.33		752.295	1509.19	858.953		6302.46		9060.87	3565.69		585.82	154.984		1025.17	576.575	268.582	999.354	27552.1	2215.29	22103.6	644.625		1088.95	571.803	581.38	362.407	62.6727			264.429	1195.48		488.455
Q8TC44	POC1B_HUMAN	POC1 centriolar protein homolog B	POC1B	6	2319.27			24786.8		485.344										2890.09			357.809	866.935	15906	5673.76				1966.63										433.076			2531.18	26690.5	1500.27
Q8N9B5	JMY_HUMAN	Junction-mediating and -regulatory protein	JMY	18	10695.1			2180.3	2728.24	604.091	13677.3	554.557	180.881	147.188		95.4943	24757.7	28521.4	12214.5		80.2439	1276.31	249.652	4092.66	1272.38		324.188	742.789	533.727	427.664	560.879	545.988	1648.79	5102.35	44471.9	560.551	2585	2350.15	5099.91	3224.22	638.113	708.138		603.143	927.508	785.849	731.009	497.012	1265.82
Q8NI36	WDR36_HUMAN	WD repeat-containing protein 36	WDR36	60	98426.2	32036.1	71447.1	16100.6	36855.7	91170.1	39709.1	40122.1	19437.8	13712.4	21620.6	25080.8	21067.2	66439.7	41904.1	27302	14709.6	21531.9	28806	45339.4	69913.5	24303.9	45544.1	35143.2	41734.5	44523	46800.8	57907.9	49501.5	44114.7	27999.7	16083.8	30824.3	38379	14518.9	49167.5	44624.7	25772.1	67895.2	65140.1	76026.6	81590	24100.1	25159.6	25368.9
O00178	GTPB1_HUMAN	GTP-binding protein 1	GTPBP1	26	3937.34	5176.9	22144.3	1974.84	509.702	19739.9	4466.8	3308.53	15439.1	15114.3	143.807	14642.4	40192.7	8828	38086.9	12563.5	27810.2	16852.6	16994.3	6718.03	13908.8		4069.64	15110.9	7786.62	18262.8	15893.5	24406.3	6531.37	8351.06		304.107	26053.8	4979.05	6269.04	5444.68	5066.63	496.559	4664.39	3223.96	2002.96	3917.46	1317.72	825.786	1099.11
P16152	CBR1_HUMAN	Carbonyl reductase [NADPH] 1	CBR1	39	104977	102061	99746	90668.1	86395.6	88534.9	349717	321214	221061	228762	58865.4	243753	255799	206203	136185	161224	157066	183417	157023	171123	229853	93799.4	191478	195427	196976	199518	105944	110864	120979	55657.4	45893.9	41213.4	59420.3	104700	79468.1	116092	89270.2	75138.4	92056.6	68405.6	66993.7	65234.6	63665.1	66730.1	57593.7
Q9NV96	CC50A_HUMAN	Cell cycle control protein 50A	TMEM30A	17	2781.09	4057.66	6182.24	12966.5	2601.71	2772.03	2272.92	1366.59	1712.44	693.786	1178.01	1921.45	2344.98	365.672	867.96	1628.14	2265.26	399.737	372.942	5416.04	3877.81	9622.72	7035.33	11742.4	1827.14	7009.17	2696.5	1375.01	13175.2	419.01	569.49		7752.65	453.659		17370	13230.6	13265.2	650.907	184.296		14776.3	3180.88	659.255	5637.45
P63162	RSMN_HUMAN	Small nuclear ribonucleoprotein-associated protein N	SNRPN	21	2644.92	6704.41	101600	7379.64	6110.2	6080.58	24500.4	39322.6	22676.7	33070.2	809.555	21464.7	32076.8	27065.9	28258.3	15976.4	8854.4	22060.8	32537.1	32714.5	40534.3	492.779	38502.5	39325.4	39059.7	39450.4	16236.3	34560.4	46133.5	13683.6	18454.2	24375.7	14294.2	33950.5	58426.8	13449.3	220436	23217.4	29410.5	17566.8	32661	23311.7	12152.6	14678.7	11102.4
P49842	STK19_HUMAN	Serine/threonine-protein kinase 19	STK19	9			1332.06					582.14	130.288		488.129				90.0423	17413.2	372.22	5279.9	4441.8				2471		384.818	506.942		893.066	489.706								2198.04	301.512			708.163	298.225	117.365
Q9BWE0	REPI1_HUMAN	Replication initiator 1	REPIN1	13	3359.87	3279.17	3820.86	1954.48	2455.5	2232.57	3751.84	4265.06	1828.24	2573.54	791.955	1699.32	1769.19	1562.86	2128.68	1753.81	3787.05	2203.06	2448.62	2604.42	2944.82	1095.15	3061.12	3951.61	7184.24	4690.62	2291.54	2290.06	2383.21	2192.08	2042.22	1667.62	964.037	2663.63	3045.57	2233.33	512.712	1273.79	1154.09	1466.53	1361.88	18534	828.392	1068.57	1541.82
Q66PJ3	AR6P4_HUMAN	ADP-ribosylation factor-like protein 6-interacting protein 4	ARL6IP4	11	515.926	850.072	572.773		328.998	2277.99	2980.31	3388.39	2676.25	2583.22		2181.49	4217.56	2504.64	2581.64	1946.18	1075.65	1766.36	1611.59	4694.25	1333.76		3083.5	1080.2	5435.92	2231.86	2142.4	2817.16	5149.89	327.94	761.419	5674.69	244.029	2681.28	3023.02	2378.84	1337.76	3735.8	444.918	1990.99	11137.2	546.109	1157.63	1286.24	928.901
Q8ND30	LIPB2_HUMAN	Liprin-beta-2	PPFIBP2	31	3340.31	39429.1	41325.4	65136.1		2227.76	1304.98	10401.8	1002.33	3900.36	750.706	3391.34		1571.33	4239.26	531.035	1125.39	475.575	2814.24	5633.02	3731.87	554.621		5638.26	7027.03	34830.8	1488	7459.71	576.653		4509.36	519.932	1586.53	5108.12	5656.59	1593.05	2600.51	1579.23	20466	1713.23	1022.5	2039.55	3182.5		5421.11
P19438	TNR1A_HUMAN	Tumor necrosis factor receptor superfamily member 1A	TNFRSF1A	10	16573.2	7190.94	10025.1				6307.34	6463.13	6138.88	8683.66		7937.28	8186.99	10251.9	10799.9	9795.35	7075.2	43571.2	4460.76	2819.6	3418.33		3450.94	39188.8	5303.71	36933	5269.72	5621.41					275.884			846.626	1505.68	2459.08	483.498			566.989	1348.46
Q5T4F4	ZFY27_HUMAN	Protrudin	ZFYVE27	8				1190.35	1093.58	1007.31	584.268		463.957	288.647	635.617		155.645	345.582	191.028	230.831					452.259	368.465	441.51	1015.79	1059.17	1346.05			169.944		251.322		1076.05				752.076					332.998
Q9BQI3	E2AK1_HUMAN	Eukaryotic translation initiation factor 2-alpha kinase 1	EIF2AK1	13			467.314			5379.81	1155.01	2613.66	853.945	103.331		1330.15	422.046		201.03	920.978	493.295	1160.88	788.894	540.039	892.526	2661.41	3757.81	3964.77	3219.64	3397.96	4292.16	3389.87	3050.65	795.116					48789.7		5406.5			3370.86	217.403	4583.1	214.011
Q9BZE9	ASPC1_HUMAN	Tether containing UBX domain for GLUT4	ASPSCR1	22	20650.1	18763.2	20717	1318.49	834.27	4589.6	1343.19	2202.26	126.611	3064.83	191.351	1440.82	786.305	33184.7	30002	32008	18558.7	18677.1	1641.62	1848.94	26079		22872.4	21959.5	22077.5	20541.2	19818.6	20445.6	1062.19	325.821	261.507	20523.2	171.605		22354.7	23232.7	14157.5	9199.3	6282.69	3942.5	4009.92	4575.94	8369.69	1238.57	999.11
Q765P7	MTSS2_HUMAN	Protein MTSS 2	MTSS2	14		5702.49					799.717	2884.42	19796.5	1802.87		1690.33	1281.67	106203	964.194	930.054	932.568	4591.47	715.215	373.733	4427.36	4907.92	11825.8	1713.1	536.665	856.085	291.963	431.044	488.638	355.614	238.322	222.632		1786.3	888.605	508.119	4719.46					1743.03	39044.3	1749.19
P0CG12	DERPC_HUMAN	Decreased expression in renal and prostate cancer protein	DERPC	20	75474.6	71093.5		1828.06	212.002	2628.65	82131.8	57068.4	56551.5	54379.1			792.739	12991.3	2798.33	58668			44755.2	39379.8	40894.2	311.899	48461.3	4722.74	58850.4	56046.6	60187.8	5955.54	6086.58	43038	32063.2	34744.8	243.649	4047.66	60974	5760.34	4668.76	47312.6	567.329		2955.28	130.125	721.066	115.58
Q9H867	MT21D_HUMAN	Protein-lysine methyltransferase METTL21D	VCPKMT	5		46812.4	237.057		4746.45					5324.65				1895.36	307.345						5400.6		5481.37	985.248		8801.4			256.33									1752.6						2775.13
Q9HAH1	ZN556_HUMAN	Zinc finger protein 556	ZNF556	9				696.787		9414.06		596.911		4242.46		25864.9		23057.3	24023.6		1368.67				23807.5		2165.98					471.026		191.967	871.302		940.232	894.419	7391.45	777.755	1024.93			196.608		224.646
Q13464	ROCK1_HUMAN	Rho-associated protein kinase 1	ROCK1	71	26992.7	27887.4	11862.7	26482.6	48763.2	34321.1	20060	70624.6	89940.6	41679.9	50173.2	35469.9	38556	34469.4	33812.1	26910.7	16700.8	14548.7	30811.1	33163	18969.6	15420.3	56200	12259.8	19508.9	16107.6	10044.2	12553.6	34793.3	35714.5	25994.2	20120.9	90144.1	19523.3	73968.2	118786	5201.98	108245	215911	65837.9	10215	7929.08	2884.65	13979.5	15592.4
Q5T1J5	CHCH9_HUMAN	Putative coiled-coil-helix-coiled-coil-helix domain-containing protein CHCHD2P9, mitochondrial	CHCHD2P9	8	37826.6	30673.7	33887.8	5812.59	6371.33	22502.7	15773.8	24256.1	28413.7	24489.5		13012.1	27208.3			11896.1	19599.4	16232.6	15859.7	18996.1	22541.1	9935.97	8003.51	8844.8	8807.09	11169.5	7465.94	5191.61	5605.23	1108.48	3809.35	2343.85	11678.4	4453.58	4585.96	4491.7	4064.85	3519.05	4738.32	6036.69	2236.11	1446.67	2419.92	9581.9	3886.76
Q9UJU6	DBNL_HUMAN	Drebrin-like protein	DBNL	35	65517.1	62552.7	74195.6	44609.3	34378.3	34967.8	48273.9	47441.2	39918.1	35321.1	18532.6	29460.6	33729.9	34096.2	34034.2	30961.8	36043.4	40812.6	38225.4	40827.8	48420.5	31899.8	46626.8	47046.2	56001.6	61094.6	43398.2	47603.4	43433.5	22081.2	23331.5	21230.2	29423.2	36363.7	34039.7	41075.7	30547.3	28937.8	59692.5	18134.5	23550.2	21282.3	21204.1	25961.4	24786.1
P33527	MRP1_HUMAN	Multidrug resistance-associated protein 1	ABCC1	62	12063.5	10721.7	9050.05	8627.36	7161.15	41167	28070.7	12220.5	11459.1	9031.69	2420.08	15817.9	11758.2	24408.8	30167.5	7858.37	10496.1	12232.5	11793.2	18990	136965	2035.02	40153.4	11172.3	13803.3	10257.6	22842.5	35725.3	44512.8	14236.5	17712.8	21183.5	7779.94	63146.7	27683.8	30067.4	49502.7	45679.5	33340.1	34554.8	34617.8	26089.9	31152.5	20784	47884.9
Q9Y597	KCTD3_HUMAN	BTB/POZ domain-containing protein KCTD3	KCTD3	25	2289.91	29642.9			489.375	4364.48	4404.03	6263.26	44711.1	4437.75	1354.66	4204.03	4577.77	22958.5	11339.3	25636	1698.16	2962.9	3603.78	2189.99	1178.1	9690.99	4770.87	1864.47	1871.76	10247.8	329.644	6180.39	3958.04	541.889	1621.55	5554.39	679.512	27151.6	3095.81	34485	1421.14	560.243	6111.28		133.843	6024.24	437.008	33982	591.131
P00973	OAS1_HUMAN	2-5-oligoadenylate synthase 1	OAS1	7	452.576			204.047				6216.74		9022.14			2892.47			1014.47					5146.48				1132.06		2097.23	2589.97	376.533			216.593								2670.3			108.495	365.117	306.107
Q99543	DNJC2_HUMAN	DnaJ homolog subfamily C member 2	DNAJC2	36	11003.6	28902.8	8623.35	7927.96	457.985	5721.69	13452.5	11209.4	14927.6	9726.28	23649.2	9348.77	59358.9	9216.55	9361.04	12939	7183.66	11635	8716.27	20555.7	33657.6	2651.25	17008.2	35245.4	13965	21202.2	10236.9	12362.9	17800.3	9932.87	11496.5	16240.2	2946.16	17885.1	11189	19144.9	19467.2	124419	144215	20628.1	27200.6	32041.3	134529	131996	132597
Q8N3E9	PLCD3_HUMAN	1-phosphatidylinositol 4,5-bisphosphate phosphodiesterase delta-3	PLCD3	25	15800.6	39014.2	43142.4	13179.6	17745.6	26725.5	7069.97	7083.82	5000.74	1068.04	2529.91	13344.4	5798.38	1317.3	2825.34	515.846	2433.08	1416.43	1159.56	1351.84	1631.53	4957.5	1608.14	1308.95	2229.21	935.616		1672.96	2719.85	695.32		459.216	2380.58	46423.8	7418.11	4522.96	2851.39	1807.34	2442.15	1369.14	2217.27	2288.53	26696.3	2478.64	3620.23
Q9C0C7	AMRA1_HUMAN	Activating molecule in BECN1-regulated autophagy protein 1	AMBRA1	49	20045.2	9158.28	13470.3	13366	771.622	13504	6301.55	8813.34	10867.2	279.067	9421.91	855.835	15474.5	7387.87	9459.55	14422.2	8662.03	9907.86	10514.2	76374.9	11550.7	4166.2	456.229	13067.5	31500	19505.7	7307.12	5523.29	16208.7	5291.34	19519.7	14483.6	1075.1	10242.2	14125	2146.82	21042.8	21186.7	16347.8	33861.3	31107.2	45226.9	28001.1	12313.2	10853.4
Q9HCJ1	ANKH_HUMAN	Progressive ankylosis protein homolog	ANKH	6			169.308				1710.2						5458.57	3214.24	4071.77	4243.49	501.109			3671.48	955.376		1543.62	3516.47	58970.1									938.089	711.49		1878.42	1615.8						1351.54
O75575	RPC9_HUMAN	DNA-directed RNA polymerase III subunit RPC9	CRCP	4																							155.029	1444.85	756.009																	131.919
Q13363	CTBP1_HUMAN	C-terminal-binding protein 1	CTBP1	22	7448.93	4912.92	7306.08	5805.65	10913.9	6590.97	21080	19714.4	22977.8	14657.8	121.774	16995.3	18190.4	14019.7	10796.3	11313.6	18624.9	16057.8	11972.3	16328.2	26193.1	3080.43	17381	19181.4	20683.8	15912.8	13239.4	14335.8	16896.5	12005.4	15488.3	4871.31	3921.62	9856.67	22035.5	21629.1	14853.3	13486	20172.4	20227.5	9137.89	12794.6	5046.95	5408.15	2539.66
O14593	RFXK_HUMAN	DNA-binding protein RFXANK	RFXANK	4																1874.24					283.209								538.074											1028.93		1270.18
Q96PU4	UHRF2_HUMAN	E3 ubiquitin-protein ligase UHRF2	UHRF2	24	4637.84	60938.5	785.856	480.624	8452.22		11735.3	11638.2	9932.94	8461.06	179.845	9959.58	17841.7	12908.7	24221.6	10773	6125.43	16650.3	15931.1	8986.33	13279.5	4886.4	10669.9	12773.5	12660.7	12175	4883.76	5481.55	22502.2	4658.89	5852.23	6578.53	7049.59	5337.43	6585.26	7481.39	8559.23	7067.76	26540	14182.9	7552.16	6849.09	6077.17	12342.9	5671.75
A2AJT9	BCLA3_HUMAN	BCLAF1 and THRAP3 family member 3	BCLAF3	10	24126.3				5191.42	15365.1	2889.23	1375.45		5337.13		7963.85	1054.31	505.132			1569.19	8375.53	9285.52	2978.09			3381.74	2870.27	9873.07	3864.96	1972.81		1854.4	2114.12					1345.26	847.346			122126	5720.91	4818.73	3115.88			2707.49
Q96M94	KLH15_HUMAN	Kelch-like protein 15	KLHL15	16	423.177	2041.35	913.809					2582.42		2628.01			306.88		1551.26			277.953	665.534		484.412	183.097	10777.6	2325.54			472.03		301.489			698.766						3068.62	3410.67				2015.43
Q96B26	EXOS8_HUMAN	Exosome complex component RRP43	EXOSC8	15	8691.77	16948.4	19097.8	2911.52	2326.57	6093.3	12612.9	9463.38	7194.81	7427.62	1257.11	7036.03	7441.09	5958.43	6869.27	7828.63	11944.6	15486.5	12040.3	9722.47	8646.03	4165.2	27699.3	12056.7	31708.7	37578.1	7820.2	26927.6	8983.16	10752.9	11165.8	12329.6	3855.42	10307.5	7368.42	9317.91	9148.23	12883.1	6740.81	7122.17	9972.1	11731.8	6636.2	27120.5	25912.5
O43181	NDUS4_HUMAN	NADH dehydrogenase [ubiquinone] iron-sulfur protein 4, mitochondrial	NDUFS4	10	17859.7	20117.1	29335.1	28551.3	40502.3	36026.1	10564.1	9856.57	8728.37	8805.73	228113	8389.07	9126.89	11516	6717.07	3320.65	6431.84	6177.05	10588.4	7885.36	59184.2	14959.6	56042.4	5971.79	9734.14	6858.34	5039.26	2955.97	5612.91	1158.01	2172.03	7418.44	12814.8	8599.63	8470.6	4148.92	4380.43	3155.78	7445.03	8836.25	10085.7	10831.6	3822.02	7253.37	6215.58
P62491	RB11A_HUMAN	Ras-related protein Rab-11A	RAB11A	22	209458	220231	222987	161517	284812	213785	118020	114827	109540	98305.7	87033.3	110196	82838.6	57060.8	52822.8	41927.6	78234.5	73976.6	71824.4	81552.5	93569.9	61252.9	97652.8	93747.8	94306.3	73876.2	77054.6	84991.8	76309.7	44710.1	38182.1	52065.9	40522.6	43558.9	42280.3	63732.3	116089	109801	135184	119794	124692	125948	125697	121079	115513
Q53RE8	ANR39_HUMAN	Ankyrin repeat domain-containing protein 39	ANKRD39	9	211.777		20497.2	941.878			490.212		7178.29	22713.3			1677.59	1085.15			13112.5	502.554	646.332		20376.1	8484.41	16903.3				12643.9		2308.98			1799.41	4220.47	9439.47		1617.76	2993.2		3591.11			278.855
Q9NUT2	MITOS_HUMAN	Mitochondrial potassium channel ATP-binding subunit	ABCB8	22	4540.22	6770.34	6277.95	1377.05	4495.61	5249.22	1796.89	1092.16	591.949	2052.22	809.862	947.94	1822.82	242.312	528.65	955.251	5186.72	2258.93	1509.01	6396.07	2667.18	1773.34	322.568	1733.29	6615.46	9947.49	922.837	1766.78	1758.49	630.668	357.797	1426.79	4666.87		443.16	1576.19	3136.88	679.248	2000.14	367.202	6217.11	1734.79		2098.78	570.979
P20742	PZP_HUMAN	Pregnancy zone protein	PZP	16	13543.1	10331.4	7080.45	140.176			8958.82	20496.9	7255.38	6369.51		15741.8	11739.4	10943.2	21584.9	8643.6	7594.63	12714.9	12833.1	12244.5	11083.7		19528.4	9995.98	9956.86	9097.34	322.843	3704.83				31000.8		32389.8	3058.51	6477.99	3369.98	4272.02	1710.13	2493.93	3544.82	2112.23	5254.96	3278.47	3547.24
Q9UKA2	FBXL4_HUMAN	F-box/LRR-repeat protein 4	FBXL4	9		556.994	382.727				218.272						7400.63						268.641		276.895	36408.1	414.877	742.394			889.421	436.212					1270.65	213387			1344.97	262.584	1316.7	467.68		37318.8	131.723	1232.14
O43570	CAH12_HUMAN	Carbonic anhydrase 12	CA12	9	48238.4	3009.05	4796.4	1061.71	1416.84	1522.68						88.5674	279.767	8745.6						125.806			3781.34			671.703				4387.61				167.505							12707.6		435.613
Q6W2J9	BCOR_HUMAN	BCL-6 corepressor	BCOR	44	2824.1	35377.9	2722.48	5950.29	380.604	4450.09	11824.5	2145.01	3154.57	19588.2	8094.74	211.553	468.935	3702.57	36381.6	2177.47		6702.08	211.083	1112.74	2222.63	48598.2	22753.1	3650.98	602.079	1218.82	760.79	785.991	1601.44			5770.96	359.959	3382.71	865.123	16683.6	606.442	366.831	10882.8	14321.6	10586.8	40568.1	11240.3	3281.8	3263.64
Q9Y5V3	MAGD1_HUMAN	Melanoma-associated antigen D1	MAGED1	14	2991.44	9606.81	7082.05		1507.16	1808.91			9756.53			276.822	486.099		154.675		2312.41	7572.02	1728.07	6226.14				2715.56	2073.15		2832.48		2539.28	1489.23	4563.21	434.724				3632.63	1287.43	1340.29	959.559	3954.93	3774.55	3946.61	2145.49	1977.81	5973.83
Q9C091	GRB1L_HUMAN	GREB1-like protein	GREB1L	5	22253.7	5010.28	1907.31	4371.25		2241.15	120.871	208.022		261.354	158.364	30.8239							1944.25	8810.17	1902.33				360.897	357.144	2309.73				8542.52		8102.76	8448.32	9452.2	88.0294	965.427	513.409	511.015				236.355	281.603	1039.64
Q07912	ACK1_HUMAN	Activated CDC42 kinase 1	TNK2	18	216.554	970.519	3582.39			6715.15		2887.53	1665.93				221.375	2675.35	1918.26	2757.3	9819.73	2028.46	2923.75	150.184	929.622				169.158		6391.79	2703.62	33425.8			37162.8	679.13	912.166	5702.78	6803.26	5052.82		1242.59	1392.78	1477.62	1415.46	2478.42	339.225
Q9UID3	VPS51_HUMAN	Vacuolar protein sorting-associated protein 51 homolog	VPS51	36	58950.4	28069.7	26851.2	16624.7	21803.1	17753.8	8555.45	20965.2	17494.7	16906.2	1165.53	15255.6	8209.39	7949.07	9474.06	6489.59	7572.85	10792.7	10137.6	1754.46	8648.68	5190.39	10049.9	12328.2	56603	17354.1	9729.56	3316.64	2683.15	1458.95	2005.11	6006.87	14426.8	4948.29	7025.95	9437.55	5399.1	32376.5	12445.7	5525.36	5121.63	6365.06	2499.82	3213.37	984.195
O14556	G3PT_HUMAN	Glyceraldehyde-3-phosphate dehydrogenase, testis-specific	GAPDHS	22	44036.6	30996.7	36080.6	26109.8	31491	37489.5	43636.1	43707.1	58067.9	37020	15849.1	58444.4	41029.2	44052.2	37868.3	41518.3	31856.9	27815.8	19664.1	18600.1	37832.3	13530.8	35953.4	35859.9	38522.3	41111	49117.5	15490.3	50211.7	24160.9	24170.1	27658.5	17459.5	38241.4	38007.4	41197.5	30701.7	28147.2	29405.2	14335.5	23286.2	18926.4	20755.6	19524.4	18306
Q7Z6J8	UBE3D_HUMAN	E3 ubiquitin-protein ligase E3D	UBE3D	10							6941.48	2467.98	2702.05	8117.83	297.194				2680.82	4445.82	1076.56		891.378	1434.5	1102.01	1793.3			1636.11	1319.63		2270.04			1881.64	2098.48			9490.65				6303.85	419.537	450.89	795.202			1614.54
Q9H4Z3	CAPAM_HUMAN	mRNA (2-O-methyladenosine-N(6)-)-methyltransferase	PCIF1	16	7463.97	1118.75	1110.5	406.016	5273.7	4124.53	645.156	1599.67	1590.18	17993.3		13846.7	733.556	2150.98	1591.84	1238.16	5271.7	1958.78				1022.77	521.786			410.018	1693.14	444.246	6598.54	253.228	2935.7	321.211	23660.7	905.26	1882.92	916.232	367.852	211.701	15869.8	169.363	316.639	230.896	27649.4	1487.89	414.532
Q92570	NR4A3_HUMAN	Nuclear receptor subfamily 4 group A member 3	NR4A3	9			455.345				75.9011	6212.91		1615.66			5997.44	2617.63	42.3979	1279.85		1037.93	2783.91	230.194	156.862		2811.17	2457.25			2099.03	1433.65	921.629					3074.68	2980.25		6414.98	281.321		643.01			2105.13	744.516	2386.48
P54619	AAKG1_HUMAN	5-AMP-activated protein kinase subunit gamma-1	PRKAG1	22	37545.1	29526.2	38083.1	53793.8	39786.9	31514.2	73121.4	5955.2	78479.3	4634.81		4725.6	4306.95	3496.54	53728.8	54878.5	4683.43	5426.09	9320.78	9447.23	8369.41		8800.01	12112	8542.65	10222.1	5386.63	6833.41	6209.67	9649.21	4766.45	8740.44	27997.9	5118.14	6614.7	18562.5	6931.24	99760.9	13389.2	10699.8	11195.3	24691.1	8154.67	8877.58	9465.26
P48426	PI42A_HUMAN	Phosphatidylinositol 5-phosphate 4-kinase type-2 alpha	PIP4K2A	21	13428.9	13739	10111.9	6317.36	2620.89	8321.74	5377.99	4063.11	1706.05	1354.28	5177.39	4010.62	4981.07	2508.1	2423.42	3392.18	4102.13	2218.41	2720.01	5582.85	4081.1	5688.6	3914.12	5893.21	8011.62	5158.34	3226.21	7851.06	1515.96	10267.4	1502.38	2523.18	5752.4	1674.61	4654.07	2327.13	2544.28	8348.02	2155.91	2227.5	4671.34	6180.62	1341.1	2987.55	2464.91
P78380	OLR1_HUMAN	Oxidized low-density lipoprotein receptor 1	OLR1	5	10267.5	9779.46	18197	8488.51	17450.9	8107.95	1962.96	2698.39	7345.49	1105.63		1642.62	1176.95	1012.46	650.764	1002.19	10005.9	2924.17	3575.81	4713.26	5579.32		4351.07	4054.4	4038.14	4487.37	5831.73	3923.37	3983.13	1122.4	134.148		521.704		1897.47	1993.6	5374.71	5450.06	5776.14	3947.3	4018.78	6279.33	4346.43	6012.53	3967.5
Q9UHB9	SRP68_HUMAN	Signal recognition particle subunit SRP68	SRP68	60	103268	117314	96300.4	36512.2	52832.6	57296.7	38671.3	55805.8	30914.4	24933.2	15608.3	53012	35196.6	59247	28669.4	32022.6	34107.3	30770.4	28144.4	27954	37917.3	34890.9	31965.6	43275	44613	41030.3	34828	39990.1	69559.7	27230.5	31864.1	29707.7	25563.6	40346	69591.1	68477.6	25811.6	29496.5	34966.1	25496.8	21563.3	24127.4	24939.6	26420.3	25767.3
Q9Y6N7	ROBO1_HUMAN	Roundabout homolog 1	ROBO1	28	32221.5	9067.35	762.403	51500.4	22616.3	20047.5	34414.2	2367.16	19436.8	40692.5	3042.32	11562.7	20385.8	17248.1	34262	32401.7	50954.4	80166.1	54243	55923.5	54286.6	11131.6	93347.3	82689.9	54346.2	32691.9	31505.1		36210.2		2569.05	747.913	37618.4	73116.8	28851.6	38293.7	52602.2	79538.2	59756.6	38936.2	62901	80489.4	55737	42994.3	28727.1
Q6DKJ4	NXN_HUMAN	Nucleoredoxin	NXN	16	11652.2	9525.04	9546.02	4729.68	3762.38	12694	5206.35	5977.31	5473.34	13155.3	2097.77	5362.59	4471.31	4730.25	5850.24	40333.6	4723.21	4123.92	3333.26	4738.63	6826.06	3457.35	6847.23	7221.01	6869.56	7794.91	2664.47	2498.97	3219.88	3983.22	4194.39	9074.16	3133.43	3000.44	2211.8	70772.5	1548.13	1580.68	6239.61	1688.55	1415.66	2081.8	1230.71	285.262	1549.73
P55198	AF17_HUMAN	Protein AF-17	MLLT6	10			659.291				3770.55	1590.3	3151.88	1418.02		2667.98	5344.65	167.319	842.66	151.963		701.357	2779.82		28736.1					3080.63	8180.98				111.457	209.964		924.165	10804			2936.05		611.844
Q9Y3B8	ORN_HUMAN	Oligoribonuclease, mitochondrial	REXO2	16	13512.4	13397	14078.6	12852.8	18087.3	18650.1	6175.51	34330.3	4870.98	9156.74	2337.6	5036.53	7264.6	7819.9	4951.4	6229.91	6529.32	7537.43	7263.76	5075.84	5698.64	6700.03	7416.62	9592.37	9753.94	8468.44	8831.08	17009.5	8930.45	7167.99	7221.85	7692.93	12009	7898.59	10075	8165.39	2417.18	3502.93	6735.01	5176.7	3624.61	4172.77	1967.19	4273.26	2035.01
O95232	LC7L3_HUMAN	Luc7-like protein 3	LUC7L3	27	7863.87	21725.4	22224	33106.4	18793.3	23968.7	16993.8	10695	21107.3	10635.3	7922.41	37293.6	28960.4	17285	18760.3	19544.6	9745.33	17671.1	23419.1	27879.6	33573	12303.7	28813.8	32513.2	18934.3	20918.9	26297.3	26501	26367.5	22816.1	38810.9	23648.1	12003.6	7937.73	20477.8	30760.4	36732.6	10591	25894.8	34037.8	33207.4	18796.1	16034.5	10335.2	24636.9
Q6P1M3	L2GL2_HUMAN	LLGL scribble cell polarity complex component 2	LLGL2	39	13833	11441.5	34043.9	56491.8	5574.4	5065.01	2093.07	3020.23	1197.74	1551.32	14559.7	2105		1970.34	821.487	9996.56	11991.5	6693.23	2298.28	935.042	230.304	5278.96	1719.33	4721.92	11754.9	2590.78	4042.11	1758.52	1609.73	6153.12	1720.76	2105.3	2054.56	2751.68	3919.34	10659.1	1177.89	7873.11	698.441	7374.59	1487.61	4698.01	8495.42	712.047	22888.5
Q9NYU1	UGGG2_HUMAN	UDP-glucose:glycoprotein glucosyltransferase 2	UGGT2	26	12441.7	4601.7	15592	10608.1	1696.09	10442.3		13949.5	9644.17	3101.93	452.133	331.241	2081.38	9976.34	2658.56	316.855	139.438	14008.4	9558.26	43687.7	1375.61	129.663	970.896	118.357	960.544	7245.2	735.615	1345.67	308594	914.991	7533.83	1024.69	207.883	487.709	262.165	6099.8	2261.89	7955.27	2907.81	51749.7	2372.64	4665.41	2203.05	1905.89	559.685
O75629	CREG1_HUMAN	Protein CREG1	CREG1	11		430.576	293.185			1913.57	265.244	195.577	213.77	498.368		684.857	393.581	328.406	356.365	362.631	362.915	399.014	272.921	2179.45	1162.85		717.45	770.348	806.824	435.29	661.574	582.436	536.782		786.654				1079.68	1842.35	479.383	958.79	1087.8	1692.04	72.3827		608.369	1039.52
Q8IV50	LYSM2_HUMAN	LysM and putative peptidoglycan-binding domain-containing protein 2	LYSMD2	9	153.774	292.763				3878.38	1387.98	1256.51	2930.49	1493.65		938.546	550.846	1102.4	709.451	4236.11	1698.49			538.706	1188.15		1544.77		1300.13	686.737	703.607	1437.88	1272.53	359.022	2185.43	1071.31		1254.61	670.555	1015.6		2034.9		3493.11	470.98	1569.6	191.781	1172	4091.22
O43760	SNG2_HUMAN	Synaptogyrin-2	SYNGR2	9	13012.1	12039	15653.8	25608	26243	28682.4	8614.68	8694.12	8198.38	6956.11	272.671	6245.06	7007.19	6582.49	6982.2	7491.72	6551.49	7542.17	8108.99	7599.67	8778.99	6600.55	8828.91	6505.33	5515.97	5638.16	3276.18		222.078	2948.19	4571.81	3679.79	6812.34	23529.8	6197.07	2363.97	5926.08	5263.53	9166.12	6956.88	8014.25	8702.08	6587.01	6727.19	7433.75
Q8IVP5	FUND1_HUMAN	FUN14 domain-containing protein 1	FUNDC1	2			4212.41	9090.86	15751.3		326.05		354.333				4510.15				1540.25		6789.16					522.102	546.582				317.223											138.002
Q9UPY3	DICER_HUMAN	Endoribonuclease Dicer	DICER1	72	26994.1	17296.5	25610.6	6820.64	26443.2	6704.9	71676.1	71042.6	57156.4	62061.9	2869.63	74801.5	65591.4	40595.4	43880.4	104521	30897.8	61397.6	64950.4	47542.8	47512.1	12966	41768.3	57551.2	66458.4	66328.2	88207.5	66039.6	70405.6	5013.89	1278.19	7147.62	2556.69	70370.8	59974.8	68689.2	86203.6	81782.3	75434.5	10099.7	64340	34888	3504.26	38378.3	2721.94
Q5XPI4	RN123_HUMAN	E3 ubiquitin-protein ligase RNF123	RNF123	32	19257.8	12840.2	18859.5		25043.8	23916.2	17191.2	584.76	1019.22	1287.2	2627.58	744.272	366.474	128.874	2190.03	8404.48	11508.6	10179.1	12367.6	11038.9	28618	7007.36	29323.5	109965	1690.55	5661.03	91772.1	13222.8	2585.36	6350.87	5881.7	662.391	11045.8	1167.09	1391.93	7393.59	2549	22533.6	24306.6	2532.8	3089.25	15520.7	16827.1	4088.73	3231.93
A4D1E9	GTPBA_HUMAN	GTP-binding protein 10	GTPBP10	32	3450.63	483.388	5761.47	2491.41	1418.52	863.222	11403.3	1834.59	1327.77	5157.66	466.997	1305.38	2214.08	1954.42	3640.46	2185.81	3575.04	1546.88	1433.54	1612.96	9931.78	6122.14	6519.74	3317.05	7107.39	44957.9	1332.92	4897.15	9821.56	1763.24		923.888	818.452	2459.06	2021.49	3187.58	15403.6	10092.6	34016.4	33987.8	3963.83	1300.29	5548.14	604.468	8323.65
Q9NRG4	SMYD2_HUMAN	N-lysine methyltransferase SMYD2	SMYD2	19	1001.94	2938.33	2351.86	545.642		519.583	257.48	1055.36	806.618	3583.16		1147.81	1196.01		1705	5644.47	10345.2	1406.17	150.253	146.804	2649.01	1143.92	484.897	964.184	653.661	3052.54	3019.55	13736.2	4999.21	464.493	174.848		525.085	1113.71	1580.76	1519.97	12963.3	2705.94	3124.71	896.739	1897.8	2045.89	2443.74	978.414	3136.39
Q9UJU5	FOXD3_HUMAN	Forkhead box protein D3	FOXD3	4								1570.09		7564.22								2030.2			888.563		887.111	1627.19	1671.24	1845.21	1837.91	7832.85	1796.97	1050.89	1479.09	1594.07		977.264	1144.65	1070.31	242.058	439.245	406.887	141.858	231.244	175.268	685.728	394.808	572.763
Q1MSJ5	CSPP1_HUMAN	Centrosome and spindle pole-associated protein 1	CSPP1	30	2855.77	2237.2	11710.9	21991.2		8689.27	10967.2	440.206	37360	8941.8	156.621	15528	10593.1	28489	11290.5	11438.1	30794.8	11869.8	7490.11	3708.39	14629.3	1449.49	485.713	10502.2	35002	13419.7	8198.15	257.556	8768.58	7363.25	1109.54	6337.78	195.846	8655.21	8704.13	9743.13	11553.7	9113.52	9196.56	1066.98	5287.54	9500.75		516.723	5421.1
Q9NZ71	RTEL1_HUMAN	Regulator of telomere elongation helicase 1	RTEL1	26	1721.23	8672.1	1443.23	15602.6	495.147	789.626		625.05	1084.4	729.184			7213.76		1270.23	6702.81	540.742	400.222	1808.1	4255.22	5510.88	7268.77	10759.1	488.262	774.552	9058.26	51775.2	236.444	77433.8		748.958	2515.23	6451.61	33777.3	2812.34	8087.19	1721.59	28386.8	2027.3	3973.83	5712.49	281.559	1281.33	3818.86
Q8TDG4	HELQ_HUMAN	Helicase POLQ-like	HELQ	5	3432.11	1444.29	855.302	3690.74	1896.53	2147.15	180.969	1425.98	646.021	769.184	1129.5		472.581	6200.88	18481	863.986	1475.45	1247.88	1831.67	1458.98	1163.03	1362.29	1050.09	1197.84	2645.38	2781.25		777.063	340.586	750.878	579.174	374.785	1126.69	521.644	456.778	4227.1	187.553			697.298
P61009	SPCS3_HUMAN	Signal peptidase complex subunit 3	SPCS3	15	20105.2	20971.6	25006.1	5820.26	14400.6	9271.06	13327.2	7692.99	6069.39	6629.66	5785.58	5696.53	18054.6	11198.7	6399.39	5160.48	6915.84	5866.76	6650.55	4914.79	6201.3	6359.4	5711.99	6646.16	5210.2	5164.2	5304.96	5311.74	4180.85	6348.6	6139.78	5283.27	8989.22	4785.24	8351.56	16294.8	5509.2	16032.3	14038.4	17162.6	13127.6	11211.5	12402.1	12503.2	10511.9
P35232	PHB_HUMAN	Prohibitin	PHB	57	822442	694501	672953	511933	514235	591100	188236	227769	194410	175142	207583	198569	173973	99561.3	160946	137291	180311	207585	282580	238985	370581	266386	282389	264768	247609	248991	151422	200785	162195	129146	147221	138713	129840	198570	229425	166658	271652	282663	287292	319064	362396	320872	284868	269998	214411
Q14141	SEPT6_HUMAN	Septin-6	SEPTIN6	26	29970.5	1757.77	27166.9	3165.77	29996.5	22862.8	19656.2	23401.3	20681.8	15154.2	7264.29	19286.4	19980	16971.7	14923.2	17880.4	11339.6	12020.5	14919.3	23349	25943.9	7573.66	22570.5	15930	10732.9	55024.8	17123.3	26129.2	21153.2	10517.2	12404.9	27991.1	7554.3	18895.5	25134.1	30453.3	13507.6	9247.34	18440.3	17966.4	15676.7	21783.8	15250.6	16374	11088.5
Q86YT6	MIB1_HUMAN	E3 ubiquitin-protein ligase MIB1	MIB1	43	6372.65	7569.49	14990.6	11082.7	1933.36	2370.7	6182.42	4079.06	6626.44	13420.3	7890.54	8375	10528.4	10530.5	4396.32	5905.2	2910.65	2685.83	1390.43	2613.24	6155.67	22922.7	5999.87	10741.6	5659.67	3985.78	2243.46	36406.1	15733.3	2449.1	4621.56	4827.13	10355.7	2076.59	3494.69	46367.6	16093.9	11132.9	21087.6	15316	20320	12138.8	10345.8	16876.5	15205.2
Q53S58	TM177_HUMAN	Transmembrane protein 177	TMEM177	9	3698.57	4762.82	3983.48	2395.57	5765.68	5344.07	884.36	395.341		504.406		2162.81				3723.36		6754.89		1365.89			1776.14		1619.61	3460.93	32515.2	3607.3	2107.63								6393.76	5519.06	1446.8	2407.17	2765.83	1870.41	3974.93	1122	7539.18
Q99959	PKP2_HUMAN	Plakophilin-2	PKP2	42	139281	131457	134265	87826.4	92951.1	83191.6	261848	40360.6	12086	9552.71	24256.7	7864.92	11955.6	9926.36	38688.8	13101.8	179136	8650.88	20332.6	10724.3	22719	28334.2	232488	13737	29803.9	28237.9	12122.9	7561.72	5535.74	3205.21	5767.56	2086.86	35989.6	4334.3	370911	373798	3691.61	3604.08	5245.81	10200.9	6465.48	1795.28	1227.85	2976.38	4177.66
Q96JW4	S41A2_HUMAN	Solute carrier family 41 member 2	SLC41A2	4	737.052	582.812			1046.83			473.984	427.287	312.796		234.733			390.106					112.149		1308.35	4961.86			319.158		3702.96				81.9629		677.615			538.828	254.162			1182.63		488.299	1056.52	530.322
Q9Y2L1	RRP44_HUMAN	Exosome complex exonuclease RRP44	DIS3	70	46496.7	53912.4	39627.3	57391.1	38473.7	33576.8	48234.1	40683.7	53697	38904.6	2279.41	38316.8	31425.4	61022.4	47470	69597.8	57073.6	63159.8	53385.4	21833.2	69741.5	312.162	53278	37227.2	44791.5	50547.2	20901	27640.4	26269	18205.2	15345	14628.7	10836	16853.1	24646.1	20699.7	140402	80240.9	78186.6	28864.2	39820.2	37936.3	25565.3	25401.7	17038.5
P10620	MGST1_HUMAN	Microsomal glutathione S-transferase 1	MGST1	20	5447.8	4354.26	4044.73	6527.78	701.009	2635.63	15233.1	10860.8	8214.77	5544.68	957.686	5519.15	4503.93	10789.6	2435.39	22770.8	10152.7	26776.8	11298.9	10071.9	9404.56	707.484	9117.36	12512	96566	13423.5	26957.7	28552.5	20388.5	5666.66	6351.45	5215.71		18776.2	16782.7	17379.8	71707.8	83052.8	86484	59546.2	72162.9	82780.5	65599.1	66774.7	61965.7
P36578	RL4_HUMAN	60S ribosomal protein L4	RPL4	130	112549	85540.8	128433	32265.5	88538.8	63402.2	310190	284384	256266	318423	176704	301323	348538	299961	346835	289747	227690	294078	206542	202110	269661	138479	228892	249864	200220	230335	174087	263097	189734	113471	223470	118831	172926	221894	243963	207305	171930	171235	203976	137231	156971	143045	142621	221636	163802
Q7Z6J0	SH3R1_HUMAN	E3 ubiquitin-protein ligase SH3RF1	SH3RF1	14	10233.5	5090.34	29832.2	39530.6	41364.6	45613.9	110224		115444	110936	50120.2	115683	28961.6	119561	109501	104952	95841	99191.9	100358	95353.8	96023.3	55553.1	83453.8	86435.1	84319.6	84376.2	66479.8	69739	69014.2	72858.9	86921.5	83507.7	44649.3	84692.1	77388.9	72758.1	67291.2	69627.5	82935.4	83780.4	101811	82044.2	71007	60982.8	60584.7
Q9Y5B6	PAXB1_HUMAN	PAX3- and PAX7-binding protein 1	PAXBP1	37	3348.42	23664.2	10084.2	10380.8	11307.5	3579.07	2773.68	6387.97	9593.59	5411.65	3282.66	3283.58	724.853	2189.72	3068.09	2868.09	7596.57	911.216	5332.45	1629.18	6470.33	23492.1	9285.11	10491.8	10207.5	3517.48	3941.27	1511.4	15399.3	883.166	11680.3	13414.1	11903.6	9126.74		12141.3	15445.9	3579.26	18062.1	10009.8	4690.6	5152.55	12567.6	9417.27	3394.65
Q8TF46	DI3L1_HUMAN	DIS3-like exonuclease 1	DIS3L	28	1219.29			7389.11		1770.08	6998.84	5717.59	13453.8	11805.2		2767.16	2540	177.301	3352.18	15686.2	7056.3	1378.17	6510.71			1195.27	23498.8	2951.55	23458	11966.1	2725.94	4717.57	3566.42			517.338	5296.36	39396.4	39826.1	1920.24	4497.24	17741.5	9398.89	2842.81	795.663	21916.2	20100.9	10334.9	16477.6
Q93009	UBP7_HUMAN	Ubiquitin carboxyl-terminal hydrolase 7	USP7	71	119999	36846.6	59734.6	21590.6	20765.4	32410.8	68292.9	97435.6	38088.9	263148	5228.11	43325.2	52295.3	39324.9	41993.3	32960.5	45575	37367.9	44571.5	34753.7	40700.7	12137.7	38896.5	43386.4	37928.1	53298.6	36893.2	30781.5	29041.3	36422.8	33243.3	22374.4	30015.3	83016.4	34401.9	29392.3	63206.7	25744.8	94882.3	82641	58018.7	75974.9	37552.7	68344.1	59883.9
Q2VYF4	LETM2_HUMAN	LETM1 domain-containing protein LETM2, mitochondrial	LETM2	3				8895.33	2291.64	1192.56																											5694.99						575.839
Q5JPE7	NOMO2_HUMAN	Nodal modulator 2	NOMO2	68	186960	190178	172831	89173.2	94499.3	75619.4	48634	49914.4	52878.2	35083	29236.2	37541.9	64880.3	28134.3	37830.8	38557.2	56281.7	47890.3	42847.7	45485.3	54942.2	24333.5	40131.9	75345.8	58199.3	51555.8	53778.1	31953.5	44028.3	15521.7	23062.9	25458	18933.2	75664.9	41094.6	24601.4	94396.2	78326.2	100127	94164.3	97505.4	167306	76119.7	78757.5	94185.7
O43739	CYH3_HUMAN	Cytohesin-3	CYTH3	11	3970.1	5626.85	981.621	565.36			6142.49		4447.5	4280.11		237.257			413.998			2303.17	473.581	61.1593	897.028				948.305	241.64	85.6749		182.755					622.901		524.318	4702.43			329.243	3012.09	1068.14	360.676	2120.37
[truncated: 8,224 more rows]
[truncated: 6 more columns]

## Sheet: 9 DEPs 
Accession	ID	ProteinName	GeneName	Location	Regulated	IHC	Type	Prognostic marker
[truncated: 9 more rows]
